# Supplementary material
Source: publisher figshare collection journal article supplement (https://acs.figshare.com/ndownloader/files/25756980)
Supplement: Supplementary file 1 [file 25756980]

## Sheet: Proteins
Checked	Protein FDR Confidence: Combined	Master	Accession	Description	Exp. q-value: Combined	Contaminant	Marked as	Sum PEP Score	Coverage [%]	# Peptides	# PSMs	# Unique Peptides	# AAs	MW [kDa]	calc. pI	Score Sequest HT: A Sequest HT	Score Sequest HT: B Sequest HT	Score Sequest HT: C Sequest HT	Score Sequest HT: D Sequest HT	Score Sequest HT: E Sequest HT	Score Sequest HT: F Sequest HT	Score Sequest HT: G Sequest HT	Score Sequest HT: H Sequest HT	Score Sequest HT: I Sequest HT	Score Sequest HT: J Sequest HT	Score Sequest HT: K Sequest HT	Score Sequest HT: L Sequest HT	Score Sequest HT: M Sequest HT	Score Sequest HT: N Sequest HT	Score Sequest HT: O Sequest HT	Score Sequest HT: P Sequest HT	Score Sequest HT: Q Sequest HT	# Peptides (by Search Engine): A Sequest HT	# Peptides (by Search Engine): B Sequest HT	# Peptides (by Search Engine): C Sequest HT	# Peptides (by Search Engine): D Sequest HT	# Peptides (by Search Engine): E Sequest HT	# Peptides (by Search Engine): F Sequest HT	# Peptides (by Search Engine): G Sequest HT	# Peptides (by Search Engine): H Sequest HT	# Peptides (by Search Engine): I Sequest HT	# Peptides (by Search Engine): J Sequest HT	# Peptides (by Search Engine): K Sequest HT	# Peptides (by Search Engine): L Sequest HT	# Peptides (by Search Engine): M Sequest HT	# Peptides (by Search Engine): N Sequest HT	# Peptides (by Search Engine): O Sequest HT	# Peptides (by Search Engine): P Sequest HT	# Peptides (by Search Engine): Q Sequest HT
FALSE	High	Master Protein	A0A0F6KUH0	10 kDa chaperonin OS=Serratia marcescens OX=615 GN=groES PE=3 SV=1	0	FALSE	Bacteria	11.155	29	2	4	2	97	10.3	5.5								8.46																	2
FALSE	High	Master Protein	A0A087ZUP0	14_3_3 domain-containing protein OS=Apis mellifera OX=7460 GN=14-3-3epsilon PE=3 SV=1	0	FALSE		37.282	44	11	77	9	256	29.1	4.89	10.59		5.98	17.61	11.65	19.38		7.82	10.56	5.33	5.63	10.06	3.84	4.23	0	5.88	0	2		2	7	2	5		3	2	2	2	3	2	1	1	6	2
FALSE	High	Master Protein	A0A0A5L8C3	2,3,4,5-tetrahydropyridine-2,6-dicarboxylate N-succinyltransferase OS=Serratia marcescens OX=615 GN=dapD PE=3 SV=1	0.006	FALSE	Bacteria	3.557	5	1	2	1	274	29.9	5.74								3.13			2.15														1			1
FALSE	High	Master Protein	A0A093T4H2	2,3-bisphosphoglycerate-dependent phosphoglycerate mutase OS=Pectobacterium carotovorum subsp. carotovorum OX=555 GN=gpmA PE=3 SV=1	0	FALSE	Bacteria	9.496	10	2	4	1	250	28.4	5.76			2.56					5.98												1					2
FALSE	High	Master Protein	A0A086FM71	2,3-bisphosphoglycerate-dependent phosphoglycerate mutase OS=Serratia marcescens OX=615 GN=gpmA PE=3 SV=1	0	FALSE	Bacteria	5.436	8	2	5	1	250	28.6	5.44			2.56					5.62												1					2
FALSE	High	Master Protein	A0A088A1W8	26S proteasome non-ATPase regulatory subunit 2 OS=Apis mellifera OX=7460 GN=Psmd2 PE=3 SV=1	0	FALSE		164.066	43	26	97	26	892	98.6	5.52	5.94		12.7		17.09	14.89			66.24	0		6.6	22.98	19.73	46.36	3.6		2		4		8	6			19	2		3	9	6	12	5
FALSE	High	Master Protein	A0A088A189	2-oxoacid_dh domain-containing protein OS=Apis mellifera OX=7460 PE=4 SV=1	0	FALSE		82.523	39	10	118	10	311	33.8	9.45	17.97		15.68	6.01	51.74	19.02	1.99		46.46	1.66		20.72	21.32	17.44	32.03	2.28		7		5	6	8	7	2		8	2		7	5	6	6	3
FALSE	High	Master Protein	A0A084X126	30S ribosomal protein S1 OS=Serratia marcescens OX=615 GN=rpsA PE=3 SV=1	0	FALSE	Bacteria	15.557	10	4	7	4	557	61.2	5							0	7.44																1	4
FALSE	High	Master Protein	A0A086FJL8	30S ribosomal protein S10 OS=Serratia marcescens OX=615 GN=rpsJ PE=3 SV=1	0	FALSE	Bacteria	11.463	24	2	5	2	103	11.8	9.86								4.57			0														2			1
FALSE	High	Master Protein	A0A086FJJ7	30S ribosomal protein S11 OS=Serratia marcescens OX=615 GN=rpsK PE=3 SV=1	0	FALSE	Bacteria	7.403	22	2	2	2	129	13.9	11.33								4.24																	2
FALSE	High	Master Protein	A0A1S6LRK7	30S ribosomal protein S14 OS=Serratia marcescens OX=615 GN=rpsN PE=3 SV=1	0.006	FALSE	Bacteria	3.428	19	1	1	1	101	11.5	11.02								0																	1
FALSE	High	Master Protein	A0A093SZE9	30S ribosomal protein S16 OS=Pectobacterium carotovorum subsp. carotovorum OX=555 GN=rpsP PE=3 SV=1	0.001	FALSE	Bacteria	3.803	16	1	2	1	82	9.1	10.55								4.4																	1
FALSE	High	Master Protein	A0A080UUJ8	30S ribosomal protein S18 OS=Serratia marcescens OX=615 GN=rpsR PE=3 SV=1	0.001	FALSE	Bacteria	3.771	37	2	3	2	75	9	10.59								0																	2
FALSE	High	Master Protein	A0A0P0QIA0	30S ribosomal protein S2 OS=Serratia marcescens OX=615 GN=rpsB PE=3 SV=1	0	FALSE	Bacteria	10.376	19	3	6	3	241	26.6	8.13			1.88					0												1					3
FALSE	High	Master Protein	A0A093S414	30S ribosomal protein S3 OS=Pectobacterium carotovorum subsp. carotovorum OX=555 GN=rpsC PE=3 SV=1	0	FALSE	Bacteria	12.391	22	3	4	1	233	26.1	10.2								5.38																	3
FALSE	High	Master Protein	A0A086FJL1	30S ribosomal protein S3 OS=Serratia marcescens OX=615 GN=rpsC PE=3 SV=1	0	FALSE	Bacteria	19.181	22	4	5	2	232	25.9	10.24								11.4																	4
FALSE	High	Master Protein	A0A0P0Q7M8	30S ribosomal protein S4 OS=Serratia marcescens OX=615 GN=rpsD PE=3 SV=1	0	FALSE	Bacteria	11.614	9	1	2	1	206	23.6	10.02								3.08																	1
FALSE	High	Master Protein	A0A093RB73	30S ribosomal protein S5 OS=Pectobacterium carotovorum subsp. carotovorum OX=555 GN=rpsE PE=3 SV=1	0	FALSE	Bacteria	23.291	27	3	8	3	166	17.4	10.23							0	15.04																1	3
FALSE	High	Master Protein	A0A093RV71	30S ribosomal protein S6 OS=Pectobacterium carotovorum subsp. carotovorum OX=555 GN=rpsF PE=3 SV=1	0	FALSE	Bacteria	12.832	25	2	4	2	130	15	5.38								7.16																	2
FALSE	High	Master Protein	A0A093SE37	30S ribosomal protein S7 OS=Pectobacterium carotovorum subsp. carotovorum OX=555 GN=rpsG PE=3 SV=1	0	FALSE	Bacteria	12.771	17	3	4	3	156	17.6	10.3								9.23																	3
FALSE	High	Master Protein	A0A093SSI8	30S ribosomal protein S9 OS=Pectobacterium carotovorum subsp. carotovorum OX=555 GN=rpsI PE=3 SV=1	0	FALSE	Bacteria	5.197	15	2	4	2	130	14.8	11.09								3.6																	2
FALSE	High	Master Protein	A0A087ZZQ9	3-hydroxy-3-methylglutaryl coenzyme A synthase OS=Apis mellifera OX=7460 GN=Hmgs PE=3 SV=1	0	FALSE		5.989	4	1	1	1	453	50.8	7.74														0																	1
FALSE	High	Master Protein	A0A093SJQ9	3-hydroxyacyl-[acyl-carrier-protein] dehydratase FabZ OS=Pectobacterium carotovorum subsp. carotovorum OX=555 GN=fabZ PE=3 SV=1	0.009	FALSE	Bacteria	2.693	5	1	2	1	151	17.1	6.33								1.66																	1
FALSE	High	Master Protein	A0A088AET4	3-hydroxyisobutyryl-CoA hydrolase, mitochondrial OS=Apis mellifera OX=7460 GN=LOC412796 PE=3 SV=1	0	FALSE		66.521	39	13	59	13	440	48.7	8.75	13.97		20.89		2.21	9.41			11.2		6.13	7.23	1.71	4.59	3.7	0		6		6		4	3			5		7	5	2	2	2	2
FALSE	High	Master Protein	A0A1Q5W317	3-ketoacyl-CoA thiolase OS=Serratia marcescens OX=615 GN=fadA PE=3 SV=1	0.006	FALSE	Bacteria	3.473	5	1	1	1	387	41.2	6.71								0																	1
FALSE	High	Master Protein	A0A0G8B235	3-oxoacyl-ACP reductase OS=Serratia marcescens OX=615 GN=fabG PE=4 SV=1	0.01	FALSE	Bacteria	2.558	7	1	1	1	244	25.6	6.24								0																	1
FALSE	High	Master Protein	A0A2G4QPI7	3-phosphoserine/phosphohydroxythreonine transaminase (Fragment) OS=Serratia marcescens OX=615 GN=CS370_17160 PE=3 SV=1	0.009	FALSE	Bacteria	2.626	6	1	1	1	215	23.5	5.17								0																	1
FALSE	High	Master Protein	A0A088AI57	40S ribosomal protein S12 OS=Apis mellifera OX=7460 PE=3 SV=1	0	FALSE		15.131	30	4	7	4	168	18.6	7.12	0													2.63		4.17		1													3		1
FALSE	High	Master Protein	A0A088AVR2	40S ribosomal protein S21 OS=Apis mellifera OX=7460 GN=LOC551479 PE=3 SV=1	0	FALSE		14.333	34	2	8	2	83	9.2	6.52	1.73				0	1.8								8.13	1.96	4.34	0	1				1	1								1	1	1	1
FALSE	High	Master Protein	A0A088A5I5	40S ribosomal protein S24 OS=Apis mellifera OX=7460 GN=LOC408799 PE=3 SV=1	0	FALSE		29.239	23	3	38	3	132	15.3	10.89	6.05		8.44	0	13.02	6.91			20.63			4.33	3.62	2.12	13.12			1		2	1	2	2			3			2	1	1	2
FALSE	High	Master Protein	A0A088AFP5	40S ribosomal protein S25 OS=Apis mellifera OX=7460 GN=RpS25 PE=3 SV=1	0	FALSE		39.236	36	6	68	6	119	13.4	10.36	11	0	13.35	4.17	7.8	16.03	1.64		17.86	1.8	1.64	11.01	18.17	7.43	28.66	6.72	1.99	3	1	5	1	3	4	1		4	1	1	5	5	3	5	3	1
FALSE	High	Master Protein	A0A088AKL1	40S ribosomal protein S26 OS=Apis mellifera OX=7460 GN=RpS26 PE=3 SV=1	0	FALSE		8.855	21	2	15	2	114	13.1	11.14	2.45		5.28	0	4.98	2.03			5.26			0	6.31		4.92			1		2	1	2	1			2			1	2		2
FALSE	High	Master Protein	A0A088A003	40S ribosomal protein S30 OS=Apis mellifera OX=7460 GN=RpS30 PE=3 SV=1	0	FALSE		4.528	8	1	3	1	132	14.7	10.14	2.52				2.67				2.72									1				1				1
FALSE	High	Master Protein	A0A088AD55	40S ribosomal protein S3a OS=Apis mellifera OX=7460 GN=RpS3A PE=3 SV=1	0	FALSE		103.685	61	18	139	18	267	30	9.66	13.82		23.56	6.42	39.62	27.1			42.03	2.51		27.28	31.83	24.88	45.61	12.19	0	7		8	4	11	11			11	2		7	10	6	10	9	2
FALSE	High	Master Protein	A0A088AHT9	40S ribosomal protein S4 OS=Apis mellifera OX=7460 GN=LOC550651 PE=3 SV=1	0	FALSE		64.187	49	13	136	13	262	29.4	10.24	20.66		37.76	0	37.74	32.48			51.73	4.06		12.49	35.54	12.23	24.42	5.06	0	6		7	2	8	7			10	2		5	10	5	9	4	1
FALSE	High	Master Protein	A0A088AFT2	40S ribosomal protein S6 OS=Apis mellifera OX=7460 GN=LOC725647 PE=3 SV=1	0	FALSE		32.799	22	5	34	5	251	28.9	10.95			1.9		4.06	5.95			10.11	0		4.13	13.15	5.44	11.38	3.8	0			1		1	3			3	1		2	3	3	4	2	1
FALSE	High	Master Protein	A0A088A8A7	40S ribosomal protein S7 OS=Apis mellifera OX=7460 GN=RpS7 PE=3 SV=1	0	FALSE		68.933	56	9	106	9	214	24.6	9.76	6.26		21.26	1.62	19.06	11.27			29.61	0	0	10.64	14.56	9.08	19.88	3.78		6		6	2	9	5			8	2	1	7	4	2	4	4
FALSE	High	Master Protein	A0A087ZV06	40S ribosomal protein S8 OS=Apis mellifera OX=7460 GN=Rps8 PE=3 SV=1	0	FALSE		60.298	51	10	65	10	208	23.9	10.59	10.52		17.36	0	21.45	8.63			21.95			7.23	24.8	4.75	24.79	9.41	1.94	5		5	1	5	4			6			3	6	3	7	4	1
FALSE	High	Master Protein	T0L9B2	40s ribosomal protein s9 OS=Nosema apis BRL 01 OX=1037528 GN=NAPIS_ORF01340 PE=4 SV=1	0.006	FALSE	Nosema	3.244	5	1	2	1	187	22	9.58	0															0		1															1
FALSE	High	Master Protein	A0A087ZXD5	40S ribosomal protein SA OS=Apis mellifera OX=7460 GN=RpSA PE=3 SV=1	0	FALSE		68.848	38	9	79	9	310	33.7	5.05	15.65		11.36	2.68	8.18	17.39			30.94	2.85	1.96	8.54	8.15	7.07	26.44	6.69		4		3	1	4	6			6	2	4	4	3	3	4	4
FALSE	High	Master Protein	C5C9S4	4-hydroxy-3-methylbut-2-en-1-yl diphosphate synthase (flavodoxin) OS=Micrococcus luteus (strain ATCC 4698 / DSM 20030 / JCM 1464 / NBRC 3333 / NCIMB 9278 / NCTC 2665 / VKM Ac-2230) OX=465515 GN=ispG PE=3 SV=1	0.009	FALSE	Bacteria	2.624	4	1	1	1	383	40.5	5.29						0																	1
FALSE	High	Master Protein	A0A093SBV7	50S ribosomal protein L1 OS=Pectobacterium carotovorum subsp. carotovorum OX=555 GN=rplA PE=3 SV=1	0	FALSE	Bacteria	10.578	11	2	4	1	234	24.7	9.61								8.5																	2
FALSE	High	Master Protein	A0A0J5CEK9	50S ribosomal protein L1 OS=Serratia marcescens OX=615 GN=rplA PE=3 SV=1	0	FALSE	Bacteria	17.353	26	4	7	3	234	24.7	9.64								12.97																	4
FALSE	High	Master Protein	A0A093UQ21	50S ribosomal protein L10 OS=Pectobacterium carotovorum subsp. carotovorum OX=555 GN=rplJ PE=3 SV=1	0	FALSE	Bacteria	7.916	15	2	3	2	165	17.8	8.98								4.91			1.71														2			1
FALSE	High	Master Protein	A0A093U0Z4	50S ribosomal protein L13 OS=Pectobacterium carotovorum subsp. carotovorum OX=555 GN=rplM PE=3 SV=1	0	FALSE	Bacteria	5.078	14	1	1	1	142	16	9.91								2.51																	1
FALSE	High	Master Protein	A0A080UVX0	50S ribosomal protein L14 OS=Serratia marcescens OX=615 GN=rplN PE=3 SV=1	0	FALSE	Bacteria	13.144	30	2	3	2	123	13.6	10.42								2.77			2.66														2			1
FALSE	High	Master Protein	A0A093RB82	50S ribosomal protein L16 OS=Pectobacterium carotovorum subsp. carotovorum OX=555 GN=rplP PE=3 SV=1	0	FALSE	Bacteria	9.334	21	2	3	2	136	15.3	11.05								3.98																	2
FALSE	High	Master Protein	A0A086FJJ4	50S ribosomal protein L17 OS=Serratia marcescens OX=615 GN=rplQ PE=3 SV=1	0	FALSE	Bacteria	7.261	18	2	3	2	129	14.6	11.03								3.9			0														2			1
FALSE	High	Master Protein	A0A0G8B917	50S ribosomal protein L19 OS=Serratia marcescens OX=615 GN=rplS PE=3 SV=1	0	FALSE	Bacteria	4.561	17	2	3	2	118	13.5	10.78								0			0														2			1
FALSE	High	Master Protein	A0A093SBE1	50S ribosomal protein L2 OS=Pectobacterium carotovorum subsp. carotovorum OX=555 GN=rplB PE=3 SV=1	0	FALSE	Bacteria	22.721	19	4	9	1	273	29.9	10.93								6.93			0														4			2
FALSE	High	Master Protein	A0A1Q4NU74	50S ribosomal protein L2 OS=Serratia marcescens OX=615 GN=rplB PE=3 SV=1	0	FALSE	Bacteria	20.892	19	4	9	1	274	30	10.95								4.85			0														4			2
FALSE	High	Master Protein	A0A080UXX3	50S ribosomal protein L20 OS=Serratia marcescens OX=615 GN=rplT PE=3 SV=1	0.008	FALSE	Bacteria	3.038	8	1	2	1	118	13.5	11.47								1.98			1.68														1			1
FALSE	High	Master Protein	A0A093UVI3	50S ribosomal protein L21 OS=Pectobacterium carotovorum subsp. carotovorum OX=555 GN=rplU PE=3 SV=1	0.008	FALSE	Bacteria	2.71	10	1	1	1	103	11.6	9.92								1.66																	1
FALSE	High	Master Protein	A0A084WVF9	50S ribosomal protein L22 OS=Serratia marcescens OX=615 GN=rplV PE=3 SV=1	0	FALSE	Bacteria	4.279	19	1	2	1	110	12.2	10.23								2.45			0														1			1
FALSE	High	Master Protein	A0A0G8BDT6	50S ribosomal protein L25 OS=Serratia marcescens OX=615 GN=rplY PE=3 SV=1	0.005	FALSE	Bacteria	3.598	10	1	2	1	94	10.5	9.64								3.81																	1
FALSE	High	Master Protein	A0A093SJ59	50S ribosomal protein L3 OS=Pectobacterium carotovorum subsp. carotovorum OX=555 GN=rplC PE=3 SV=1	0	FALSE	Bacteria	11.057	19	3	5	3	209	22.2	9.99								8.17			0														3			1
FALSE	High	Master Protein	A0A093TNJ0	50S ribosomal protein L30 OS=Pectobacterium carotovorum subsp. carotovorum OX=555 GN=rpmD PE=3 SV=1	0	FALSE	Bacteria	11.316	39	2	6	2	59	6.5	10.59								6.42			0														2			1
FALSE	High	Master Protein	A0A093S407	50S ribosomal protein L4 OS=Pectobacterium carotovorum subsp. carotovorum OX=555 GN=rplD PE=3 SV=1	0	FALSE	Bacteria	22.229	33	5	9	5	201	22	9.6	2.26							12.08			0							1							4			1
FALSE	High	Master Protein	A0A0M4QZH8	50S ribosomal protein L5 OS=Serratia marcescens OX=615 GN=rplE PE=3 SV=1	0	FALSE	Bacteria	14.071	28	3	6	1	179	20.2	9.51								12.14																	3
FALSE	High	Master Protein	A0A086FJK5	50S ribosomal protein L5 OS=Serratia marcescens OX=615 GN=rplE PE=3 SV=1	0	FALSE	Bacteria	11.368	21	3	6	1	179	20.2	9.51								7.85																	3
FALSE	High	Master Protein	A0A080UYA0	50S ribosomal protein L6 OS=Serratia marcescens OX=615 GN=rplF PE=3 SV=1	0.01	FALSE	Bacteria	2.569	6	1	2	1	177	18.9	9.82								0			0														1			1
FALSE	High	Master Protein	A0A086FBY2	50S ribosomal protein L7/L12 OS=Serratia marcescens OX=615 GN=rplL PE=3 SV=1	0	FALSE	Bacteria	10.62	30	3	9	3	121	12.3	4.65								10.07			1.61					0									3			2					1
FALSE	High	Master Protein	A0A086FJA0	50S ribosomal protein L9 OS=Serratia marcescens OX=615 GN=rplI PE=3 SV=1	0	FALSE	Bacteria	10.706	25	3	4	3	150	15.8	6.33								7.7																	3
FALSE	High	Master Protein	A0A088A7I3	5-formyltetrahydrofolate cyclo-ligase OS=Apis mellifera OX=7460 GN=100577699 PE=3 SV=1	0	FALSE		8.982	12	2	10	2	195	22.7	8.31	5.48					2.61			1.93		0	0		0	2.03			1					1			1		1	1		1	1
FALSE	High	Master Protein	A0A0U5WAU1	6,7-dimethyl-8-ribityllumazine synthase OS=Serratia marcescens OX=615 GN=ribH PE=3 SV=1	0	FALSE	Bacteria	12.754	30	3	5	3	156	16.1	5.54								4.25																	3
FALSE	High	Master Protein	O66220	60 kDa chaperonin (Fragment) OS=Pectobacterium carotovorum subsp. carotovorum OX=555 GN=groL PE=3 SV=1	0	FALSE	Bacteria	25.539	18	6	12	1	540	56.3	4.91							1.62	11.94																1	6
FALSE	High	Master Protein	A0A0G2R3H2	60 kDa chaperonin (Fragment) OS=Serratia marcescens OX=615 GN=groEL PE=3 SV=1	0	FALSE	Bacteria	39.622	29	10	19	5	540	56.6	4.97							1.62	16.58																2	9
FALSE	High	Master Protein	A0A087ZPA5	60S acidic ribosomal protein P0 OS=Apis mellifera OX=7460 GN=RpLP0 PE=3 SV=1	0	FALSE		98.145	47	11	140	11	317	34.4	6	30.73		33.15	8.09	38.66	22.58			41.75	0	3.52	31.42	27.15	36.19	66.33	18.01	0	6		5	4	7	4			8	2	3	5	8	6	11	7	2
FALSE	High	Master Protein	A0A088ARA9	60S ribosomal protein L13 OS=Apis mellifera OX=7460 GN=RpL13 PE=3 SV=1	0	FALSE		27.825	30	7	86	7	219	25.3	10.93	11.09		16.72	2.03	16.76	19.96	0		24.36	0		10.68	23.14	8.13	17.6	5.21		3		4	2	5	6	1		7	1		3	5	3	5	2
FALSE	High	Master Protein	A0A088AH51	60S ribosomal protein L18 OS=Apis mellifera OX=7460 GN=102654426 PE=4 SV=1	0	FALSE		41.159	38	6	75	6	188	21.7	11.75	3.02		25.87		24.71	17.82			32.69			10.57	21.1	11.94	23.57	9.96	0	1		4		3	4			4			2	3	3	4	2	1
FALSE	High	Master Protein	A0A088A7V4	60S ribosomal protein L18a OS=Apis mellifera OX=7460 GN=RpL18A PE=3 SV=1	0	FALSE		46.713	37	10	79	10	177	21	10.7	3.29		18.14		8.53	7.83			23.08			7.57	9.79	14.35	37.14	3.53		2		6		5	3			8			5	4	4	7	4
FALSE	High	Master Protein	A0A088ACL1	60S ribosomal protein L27 OS=Apis mellifera OX=7460 GN=RpL27 PE=3 SV=1	0	FALSE		24.694	33	5	13	5	134	16.1	10.59			1.88						12.28				0	5.51	5.66	0				1						4				2	2	2	1
FALSE	High	Master Protein	H9K170	60S ribosomal protein L32 OS=Apis mellifera OX=7460 GN=RpL32 PE=4 SV=1	0	FALSE		34.468	40	7	30	7	134	15.9	11.6	1.68		4.63		4.02	1.83			12.7			0	9.03	2.55	16.43	2.32		2		3		1	1			4			2	3	1	4	2
FALSE	High	Master Protein	A0A0B4J2P3	60S ribosomal protein L36 OS=Apis mellifera OX=7460 GN=RpL36 PE=3 SV=1	0	FALSE		16.984	28	4	13	4	115	13.4	11.5	2.02		1.89		1.96	2.01			6.03			2.32	4.34	2.92	6.49			1		1		1	1			2			1	1	1	2
FALSE	High	Master Protein	A0A087ZWB6	6PF2K domain-containing protein OS=Apis mellifera OX=7460 PE=4 SV=1	0	FALSE		10.099	10	3	5	3	452	52.3	6.54	1.82										0		0	2.17	1.71			1										1		1	1	1
FALSE	High	Master Protein	A0A088AHG6	6-phosphofructokinase OS=Apis mellifera OX=7460 PE=3 SV=1	0	FALSE		263.99	43	31	424	31	886	98.5	6.68	68.74		60.65	13.39	67.11	105.33	0	5.51	139.34	0	75.98	73.05	95.82	53.84	111.44	27.5	0	17		13	5	17	20	2	9	22	3	19	23	20	11	16	14	2
FALSE	High	Master Protein	A0A088AKI3	6-phosphogluconate dehydrogenase, decarboxylating OS=Apis mellifera OX=7460 GN=Pgd PE=3 SV=1	0	FALSE		116.663	51	19	179	19	482	52.9	7.46	44.07	1.72	10.51	8.23	8.43	25.07	4.24	6.69	39.12	0	26.37	23.74	17.89	22.68	19.27	20.43	0	13	2	6	4	4	11	3	8	13	1	10	9	5	7	7	11	2
FALSE	High	Master Protein	A0A087EQF2	6-phosphogluconate dehydrogenase, decarboxylating OS=Lactobacillus kunkeei OX=148814 GN=JI66_01835 PE=3 SV=1	0	FALSE		5.312	5	2	2	1	479	52.9	5.08								1.6																	2
FALSE	High	Master Protein	A0A221H706	6-phosphogluconate dehydrogenase, decarboxylating OS=Serratia marcescens OX=615 GN=BVG84_04605 PE=3 SV=1	0	FALSE	Bacteria	7.138	7	3	3	2	468	51.6	5.34								0																	3
FALSE	High	Master Protein	A0A088A588	6-phosphogluconolactonase OS=Apis mellifera OX=7460 GN=LOC551785 PE=3 SV=1	0	FALSE		13.084	18	3	5	3	238	26.2	5.97	5.24													2.16		0		2													1		2
FALSE	High	Master Protein	A0A088A551	Aa_trans domain-containing protein OS=Apis mellifera OX=7460 GN=path PE=4 SV=1	0.009	FALSE		2.62	4	1	1	1	468	51.6	6.95	1.76																	1
FALSE	High	Master Protein	A0A088AMB2	AA_TRNA_LIGASE_II domain-containing protein OS=Apis mellifera OX=7460 GN=Aats-asp PE=3 SV=1	0	FALSE		4.904	3	1	1	1	533	60.5	7.05															2.57																	1
FALSE	High	Master Protein	A0A087ZP92	AA_TRNA_LIGASE_II domain-containing protein OS=Apis mellifera OX=7460 GN=LOC412200 PE=3 SV=1	0	FALSE		10.787	5	3	3	3	714	83.3	7.03	0													0	2.1			1													1	1
FALSE	High	Master Protein	A0A088ADF9	AA_TRNA_LIGASE_II domain-containing protein OS=Apis mellifera OX=7460 GN=LOC726436 PE=4 SV=1	0	FALSE		8.841	6	2	4	2	433	49.4	8.76						0			2.73			0											1			2			1
FALSE	High	Master Protein	A0A088ARS3	AAA domain-containing protein OS=Apis mellifera OX=7460 GN=bor PE=4 SV=1	0	FALSE		33.846	19	10	15	10	608	68.8	9.03	0		2.59		1.64	1.9			2.02			1.77	2.13		9.76	0		1		1		2	1			1			1	3		4	1
FALSE	High	Master Protein	A0A0B4J2L4	AAA domain-containing protein OS=Apis mellifera OX=7460 GN=LOC410026 PE=3 SV=1	0	FALSE		79.169	47	13	34	13	415	47	5.33			2.45		5.25	2.71			27.86			0	0	17.27	23.83	3.62				1		3	1			7			1	2	4	7	2
FALSE	High	Master Protein	A0A088A5P5	AAA domain-containing protein OS=Apis mellifera OX=7460 GN=LOC410289 PE=4 SV=1	0	FALSE		4.599	3	2	2	2	752	85.5	9.23												2.04	1.72																1	1
FALSE	High	Master Protein	A0A088AW81	AAA domain-containing protein OS=Apis mellifera OX=7460 GN=LOC411858 PE=3 SV=1	0	FALSE		5.363	5	1	1	1	376	42.5	6.8									2.14																	1
FALSE	High	Master Protein	A0A0B4J2N0	AAA domain-containing protein OS=Apis mellifera OX=7460 GN=LOC550794 PE=3 SV=1	0	FALSE		94.548	51	16	81	15	405	45.7	8.5	8.97		6.71	2.12	17.65	14.98			52.47			16.28	4.61	22.21	51.84	8.13		4		2	2	5	5			11			5	3	8	10	4
FALSE	High	Master Protein	A0A0B4J2P2	AAA domain-containing protein OS=Apis mellifera OX=7460 GN=LOC551386 PE=3 SV=1	0	FALSE		77.372	49	14	50	14	393	44.5	7.44	3.54		5.46		17.3	2.95			29.95				1.79	20.78	25.91	0		3		2		6	2			9				2	6	6	1
FALSE	High	Master Protein	A0A088A5D5	AAA domain-containing protein OS=Apis mellifera OX=7460 GN=LOC552166 PE=3 SV=1	0	FALSE		153.565	46	27	135	27	803	91	8.76	9.71		30.38	6.96	33.83	27.96	0		52.29			14.45	19.87	5.85	30.35	0		7		12	7	16	12	3		18			7	11	3	9	1
FALSE	High	Master Protein	A0A0B4J2L7	AAA domain-containing protein OS=Apis mellifera OX=7460 GN=Pros26.4 PE=3 SV=1	0	FALSE		58.442	31	9	27	9	440	49.2	6.76	2.38		4.5		3.28	2.05			12.47			4.59		8.53	25.72	3.24		2		2		2	1			3			2		3	7	3
FALSE	High	Master Protein	A0A088A957	AAA domain-containing protein OS=Apis mellifera OX=7460 GN=Rpt1 PE=3 SV=1	0	FALSE		105.585	58	20	62	20	434	48.4	6.07	2.54		2.05		14.72	6.4			40.5				15.38	16.73	35.93	1.9		2		1		6	4			12				7	6	8	5
FALSE	High	Master Protein	A0A088AC90	AAA domain-containing protein OS=Apis mellifera OX=7460 GN=Tbp-1 PE=3 SV=1	0	FALSE		124.672	60	18	83	17	428	47.6	5.17	6.56		2.61		17.72	22.95			60.45			4.68	4.76	31.18	39.38	0		5		1		6	8			11			4	5	8	9	4
FALSE	High	Master Protein	A0A088AB81	Aamy domain-containing protein OS=Apis mellifera OX=7460 GN=AGLU-like2 PE=4 SV=1	0	FALSE		20.21	13	6	7	6	616	69.7	5.17				0		0			4.57						0						3		1			2						1
FALSE	High	Master Protein	A0A088AC12	AB hydrolase-1 domain-containing protein OS=Apis mellifera OX=7460 PE=4 SV=1	0.008	FALSE		2.942	4	1	1	1	305	35.2	8.95									0																	1
FALSE	High	Master Protein	Q8WSY9	Abaecin (Fragment) OS=Apis mellifera OX=7460 PE=2 SV=1	0	FALSE		4.678	45	1	2	1	33	3.6	10.02								5.65																	1
FALSE	High	Master Protein	A0A088AF57	ABC transporter domain-containing protein OS=Apis mellifera OX=7460 GN=LOC409666 PE=4 SV=1	0	FALSE		136.863	31	18	86	17	799	89.4	6.96	1.94		95.29		18.14	17.73			21.63				18.72	7.96	33.53	3.55	0	2		17		6	6			8				7	3	7	3	1
FALSE	High	Master Protein	A0A088AN63	ABC transporter domain-containing protein OS=Apis mellifera OX=7460 GN=LOC414051 PE=4 SV=1	0	FALSE		5.948	2	1	1	1	703	79.2	7.58			2.35																	1
FALSE	High	Master Protein	A0A087ZSN8	ABC transporter domain-containing protein OS=Apis mellifera OX=7460 GN=LOC726513 PE=4 SV=1	0	FALSE		5.335	4	2	2	2	625	69.1	8.76			0			1.75														1			1
FALSE	High	Master Protein	A0A087ZS34	ABC transporter domain-containing protein OS=Apis mellifera OX=7460 PE=4 SV=1	0.007	FALSE		3.298	2	1	2	1	601	68.3	8.16			0																	1
FALSE	High	Master Protein	A0A087ZQY9	ABC transporter domain-containing protein OS=Apis mellifera OX=7460 PE=4 SV=1	0	FALSE		47.035	23	11	42	10	620	69.4	6.68			26.23		2.08	4.94			4.17				2.02	4.21	13.71	1.61	2.09			9		2	4			2				4	3	4	2	1
FALSE	High	Master Protein	A0A088AHK0	Abhydrolase_2 domain-containing protein OS=Apis mellifera OX=7460 GN=LOC409201 PE=4 SV=1	0	FALSE		10.143	11	2	19	2	219	23.8	7.53	4.47		1.98	0	0	7.16				0	0	2.22		0				2		1	2	1	2				2	2	1		1
FALSE	High	Master Protein	A0A087ZSM9	ACB domain-containing protein OS=Apis mellifera OX=7460 GN=LOC411272 PE=4 SV=1	0	FALSE		61.134	78	10	155	10	89	10	7.18	9	0	4.35	9.92	7.23	18.67		25.63	20.38	5.13	15.91	10.93	4.78	59.34		45.96	19.84	4	1	2	2	3	4		5	4	3	4	3	2	8		8	7
FALSE	High	Master Protein	A0A0G8BEZ5	Acetate kinase OS=Serratia marcescens OX=615 GN=ackA PE=3 SV=1	0.004	FALSE	Bacteria	3.716	4	1	1	1	400	43.1	6.29								0																	1
FALSE	High	Master Protein	A0A088ADC5	AcetylCoA_hyd_C domain-containing protein OS=Apis mellifera OX=7460 PE=4 SV=1	0	FALSE		28.553	20	6	11	6	448	49.6	7.81			7.07									0	4.45	4.28	2.02					3									1	3	1	1
FALSE	High	Master Protein	A0A1Q5WEC6	Acetyl-coenzyme A synthetase OS=Serratia marcescens OX=615 GN=acs PE=3 SV=1	0	FALSE	Bacteria	12.088	6	3	5	2	652	72.1	6.93								8.95																	3
FALSE	High	Master Protein	A0A0G3SM13	Acetyl-coenzyme A synthetase OS=Serratia marcescens OX=615 GN=acs PE=3 SV=1	0	FALSE	Bacteria	7.964	5	2	4	1	652	71.9	6.27								3.41																	2
FALSE	High	Master Protein	A0A1C3HIY2	Acetyltransferase component of pyruvate dehydrogenase complex OS=Serratia marcescens OX=615 GN=aceF PE=3 SV=1	0	FALSE	Bacteria	7.307	4	2	2	2	627	65.3	5.27								3.73																	2
FALSE	High	Master Protein	A0A088ADU5	acidPPc domain-containing protein OS=Apis mellifera OX=7460 GN=LOC552437 PE=4 SV=1	0	FALSE		6.838	6	1	2	1	212	24.4	9									2.41						3.26											1						1
FALSE	High	Master Protein	A0A0G3SPU3	Aconitate hydratase B OS=Serratia marcescens OX=615 GN=acnB PE=3 SV=1	0	FALSE	Bacteria	27.244	11	7	10	7	865	93.5	5.36								13.37			0														7			1
FALSE	High	Master Protein	A0A093T0Z7	Aconitate hydratase OS=Pectobacterium carotovorum subsp. carotovorum OX=555 GN=KP17_02655 PE=3 SV=1	0	FALSE	Bacteria	9.334	5	3	4	1	890	97.9	5.8								2.25																	3
FALSE	High	Master Protein	A0A1C3HEB7	Aconitate hydratase OS=Serratia marcescens OX=615 GN=acnA PE=3 SV=1	0	FALSE	Bacteria	10.466	5	3	3	1	890	97.3	5.92								1.69																	3
FALSE	High	Master Protein	A0A087ZXK3	Aconitate hydratase, mitochondrial OS=Apis mellifera OX=7460 GN=LOC408446 PE=3 SV=1	0	FALSE		301.418	56	40	388	40	788	85.9	8.44	182.57		45.26	1.73	4.37	48.3		25.13	63.47	0	69.85	41.4	117.27	207.84	44.64	62.3	0	28		14	3	3	16		16	17	1	22	15	22	27	13	17	1
FALSE	High	Master Protein	A0A0G3Z809	Actin OS=Nosema pernyi OX=1112939 PE=2 SV=1	0	FALSE	Nosema	59.847	11	5	686	1	375	42.2	6.2	74.61	7.78	133.02	27.45	147.71	57.26	65.32	12.59	92.52	14.52	15.1	70.64	342.76	128.26	213.48	14.95	2.31	3	1	4	3	4	2	3	2	2	1	2	3	5	3	3	2	1
FALSE	High	Master Protein	A0A088AJ79	Actin-related protein 2 OS=Apis mellifera OX=7460 GN=LOC409313 PE=3 SV=1	0	FALSE		8.802	7	2	3	2	406	46	6.47	0													1.97		1.8		1													1		1
FALSE	High	Master Protein	A0A087ZYS4	Actin-related protein 2/3 complex subunit 3 OS=Apis mellifera OX=7460 GN=Arpc3A PE=3 SV=1	0	FALSE		7.888	11	2	7	2	177	20.2	8.51	2.66		2.45		2.33	2.35						1.69	3.8					1		1		1	1						1	2
FALSE	High	Master Protein	A0A088A168	Actin-related protein 2/3 complex subunit 4 OS=Apis mellifera OX=7460 GN=Arpc4 PE=3 SV=1	0.006	FALSE		3.51	7	1	3	1	168	19.7	8.57				0	1.81	2.16															1	1	1
FALSE	High	Master Protein	A0A088A6E7	Actin-related protein 2/3 complex subunit 5 OS=Apis mellifera OX=7460 GN=p16-ARC PE=3 SV=1	0.006	FALSE		3.455	6	1	3	1	157	17.3	5.64				0												1.91	1.79				1												1	1
FALSE	High	Master Protein	A0A088AVR3	Acyl carrier protein OS=Apis mellifera OX=7460 PE=3 SV=1	0	FALSE		19.383	23	5	52	5	187	21.5	8.43	4.06		8.74	10.47	10.76	12.88	8.16		4.43	1.63	1.71	10.92	0	9.96	1.99	4		2		3	4	3	3	3		1	1	1	4	1	3	1	2
FALSE	High	Master Protein	A0A088ARZ1	Acyl-coenzyme A oxidase OS=Apis mellifera OX=7460 PE=3 SV=1	0	FALSE		22.046	6	3	6	3	663	75	7.46			14.1												2.89					3												1
FALSE	High	Master Protein	A0A088A1B6	Adenosylhomocysteinase OS=Apis mellifera OX=7460 GN=LOC408368 PE=3 SV=1	0	FALSE		23.243	15	5	9	5	433	47.9	7.28	3.04		2.63			2.83			0		1.86	0				5.15		1		1			1			1		1	1				3
FALSE	High	Master Protein	A0A0B4J2L5	Adenylate kinase OS=Apis mellifera OX=7460 GN=Adk2 PE=3 SV=1	0	FALSE		93.598	68	18	137	17	252	28.5	8.05	21.1		11.65	1.6	11	39.19	0	3.63	13.22	0	21.63	34.2	16.61	23.65	14.4	17.8	0	10		7	2	5	12	1	2	4	1	11	10	7	6	4	9	2
FALSE	High	Master Protein	A0A084X5D1	Adenylate kinase OS=Serratia marcescens OX=615 GN=adk PE=3 SV=1	0	FALSE	Bacteria	15.286	21	4	38	3	214	23.6	6.02	5.83		4.33	1.6	3.99	6.5	0	11.99	3.98	0	5.78	6.52	1.86	6.57	4.47	4.17	0	1		1	1	1	1	1	4	1	1	1	1	1	1	1	1	1
FALSE	High	Master Protein	A0A087ZXT6	Adenylosuccinate synthetase OS=Apis mellifera OX=7460 GN=LOC409299 PE=3 SV=1	0	FALSE		8.739	9	3	10	3	449	49.3	8.12			0			2.5						0								1			3						1
FALSE	High	Master Protein	A0A093S6A1	Adenylosuccinate synthetase OS=Pectobacterium carotovorum subsp. carotovorum OX=555 GN=purA PE=3 SV=1	0	FALSE	Bacteria	6.235	7	2	3	2	432	47	5.88								2.61																	2
FALSE	High	Master Protein	A0A087ZPC0	Adenylyl cyclase-associated protein OS=Apis mellifera OX=7460 GN=LOC410158 PE=4 SV=1	0	FALSE		77.889	28	13	75	13	767	85.1	5.36	20.35			0	4.38	15.46		5.81	9.58	1.61	13.06	2.12	14.79	32.91	5.6	11.27		7			2	3	6		4	5	3	7	3	6	6	2	6
FALSE	High	Master Protein	A0A088AUH4	ADF-H domain-containing protein OS=Apis mellifera OX=7460 GN=LOC725718 PE=3 SV=1	0	FALSE		75.513	66	10	120	10	148	16.8	6.57	27		5.98	7.36	18.03	14.51	4.03	40.63	5.8	8.87	16.75	26.24	7.77	15.5		20.65	11.43	7		2	3	4	5	2	9	2	5	7	7	3	3		8	3
FALSE	High	Master Protein	Q6VQ13	ADP/ATP translocase OS=Apis mellifera OX=7460 GN=Ant PE=2 SV=1	0	FALSE		252.753	83	26	1256	26	300	33	9.69	105.25	0	221.37	126.88	252.47	163.69	59.89	1.79	203.57	47.47	7.5	122.84	269.38	201.03	512.78	95.45	26.91	18	1	20	21	19	22	15	5	20	14	9	20	17	13	20	17	5
FALSE	High	Master Protein	Q936B8	ADP-L-glycero-D-manno-heptose-6-epimerase (Fragment) OS=Serratia marcescens OX=615 GN=gmhD PE=3 SV=1	0	FALSE	Bacteria	5.015	11	2	2	2	257	29.3	4.96								1.8																	2
FALSE	High	Master Protein	A0A1C3HIW2	Agmatinase OS=Serratia marcescens OX=615 GN=speB PE=3 SV=1	0.009	FALSE	Bacteria	2.624	5	1	1	1	306	33.4	5.81								0																	1
FALSE	High	Master Protein	A0A088AJL2	Aha1_N domain-containing protein OS=Apis mellifera OX=7460 GN=LOC551720 PE=4 SV=1	0	FALSE		6.269	5	1	2	1	338	39.1	5.97												0		2.42															1		1
FALSE	High	Master Protein	A0A087ZSV1	AIP3 domain-containing protein OS=Apis mellifera OX=7460 PE=4 SV=1	0	FALSE		5.204	4	1	1	1	392	42.2	7.3						3.54																	1
FALSE	High	Master Protein	A0A087ZSV2	AIP3 domain-containing protein OS=Apis mellifera OX=7460 PE=4 SV=1	0	FALSE		31.103	15	6	9	6	577	63.1	9.04						6.84			4.4			0		0	5.71								3			2			1		1	2
FALSE	High	Master Protein	A0A088AL04	AIRC domain-containing protein OS=Apis mellifera OX=7460 GN=ade5 PE=3 SV=1	0	FALSE		7.688	3	1	1	1	420	47.2	7.43															2.95																	1
FALSE	High	Master Protein	A0A088ACS2	Aldedh domain-containing protein OS=Apis mellifera OX=7460 GN=Aldh PE=3 SV=1	0	FALSE		228.922	73	28	353	28	510	55.7	7.14	78.38		51.61	1.73	2.94	23.82		12	132.88		84.52	34.94	68.31	109.93	164.85	57.98	2.23	16		12	1	1	9		8	21		22	10	15	13	21	17	6
FALSE	High	Master Protein	A0A087ZNH4	Aldedh domain-containing protein OS=Apis mellifera OX=7460 GN=LOC409736 PE=4 SV=1	0	FALSE		14.105	10	4	7	4	520	56	8.03	1.95										0	1.82				2.88		1										2	2				2
FALSE	High	Master Protein	A0A088AVE3	Aldedh domain-containing protein OS=Apis mellifera OX=7460 GN=LOC411140 PE=3 SV=1	0.005	FALSE		3.659	2	1	1	1	527	56.6	8.1	2																	1
FALSE	High	Master Protein	A0A088AAD1	Aldedh domain-containing protein OS=Apis mellifera OX=7460 GN=Ssadh PE=4 SV=1	0	FALSE		98.072	51	19	75	19	503	55.6	8.4	10.41		23.59	6.76		13.31			28.08		12.58	6.36	0	10.48	15.22	0		6		8	4		7			9		11	6	2	6	4	1
FALSE	High	Master Protein	A0A088AID7	Aldedh domain-containing protein OS=Apis mellifera OX=7460 PE=3 SV=1	0	FALSE		36.896	28	9	25	9	487	52.9	5.8	9.77			8.26				2.16			0		3.41	1.7		0		5			5				4			1		2	1		4
FALSE	High	Master Protein	A0A088ANX1	Aldehyde dehydrogenase OS=Apis mellifera OX=7460 PE=3 SV=1	0	FALSE		122.397	47	21	91	21	551	62.3	7.33	13.32		6.53	2.45	6.24	2.23			59.27			4.31	4.99	5.79	67.6			7		4	4	5	2			17			3	4	3	10
FALSE	High	Master Protein	A0A093SUM2	Aldehyde dehydrogenase OS=Pectobacterium carotovorum subsp. carotovorum OX=555 GN=KP17_07145 PE=3 SV=1	0.001	FALSE	Bacteria	3.764	3	1	2	1	511	55.9	6.13								0																	1
FALSE	High	Master Protein	A0A093SLF0	Aldehyde-alcohol dehydrogenase OS=Pectobacterium carotovorum subsp. carotovorum OX=555 GN=KP17_17235 PE=3 SV=1	0	FALSE	Bacteria	19.995	12	6	6	6	891	96.6	6.95								3.92																	6
FALSE	High	Master Protein	A0A087ZZ66	Aldo_ket_red domain-containing protein OS=Apis mellifera OX=7460 GN=LOC411202 PE=4 SV=1	0	FALSE		6.222	8	2	2	2	321	37.2	7.87	1.68												2.44					1												1
FALSE	High	Master Protein	A0A088AGI6	Aldo_ket_red domain-containing protein OS=Apis mellifera OX=7460 GN=LOC412163 PE=4 SV=1	0	FALSE		51.844	42	11	58	11	311	35.2	7.87	21.41			0		6.74	3.47	11		2.16	2.36	13.7	2.3			2.1	1.87	7			1		4	5	9		3	3	5	1			4	3
FALSE	High	Master Protein	A0A087ZZR5	Aldo_ket_red domain-containing protein OS=Apis mellifera OX=7460 GN=LOC551927 PE=4 SV=1	0	FALSE		13.403	22	6	11	6	328	37.7	6.92	0			0		3.64		0			0	1.64				0		1			1		2		3			2	1				1
FALSE	High	Master Protein	A0A088AGI8	Aldo_ket_red domain-containing protein OS=Apis mellifera OX=7460 GN=LOC551968 PE=4 SV=1	0	FALSE		90.357	70	17	138	17	318	36.1	6.73	83.9	0		8.55		9.58	1.67	30.32		0	12.86	7.97	19.68	1.6	7.48	20.37	9.07	17	1		3		8	1	14		1	11	7	6	2	4	8	3
FALSE	High	Master Protein	A0A088AGI5	Aldo_ket_red domain-containing protein OS=Apis mellifera OX=7460 PE=4 SV=1	0	FALSE		55.553	44	12	67	12	318	36.4	7.09	17.45	0	2.29	6.17	1.68	7.89	3.71	6.01		0	9.03	7.4	19.09	2.7		13.94	2.6	6	1	1	3	1	3	2	3		4	6	4	9	1		7	3
FALSE	High	Master Protein	A0A088AEU8	Aldolase_II domain-containing protein OS=Apis mellifera OX=7460 GN=LOC409713 PE=4 SV=1	0	FALSE		243.44	28	30	282	30	1325	150.9	5.08	25.86		89.23	45.84	61.37	99.61	1.62		127.18	6.61		33.06	58.18	67.58	95.08	13.9	0	6		15	17	13	20	1		21	8		12	14	14	17	9	1
FALSE	High	Master Protein	A0A093SCL2	Alkyl hydroperoxide reductase OS=Pectobacterium carotovorum subsp. carotovorum OX=555 GN=KP17_18020 PE=4 SV=1	0	FALSE	Bacteria	21.358	30	4	8	4	187	20.8	5.26								5.93			1.63						0								4			1						1
FALSE	High	Master Protein	A0A088A8P3	Alkylglycerone-phosphate synthase OS=Apis mellifera OX=7460 PE=3 SV=1	0	FALSE		202.49	52	20	138	20	562	63.3	8.09	1.79		18.18	4.79	51.65	25.9			123.44		1.76	19.56	8.25	30.08	74.64	43.78	0	1		5	2	12	7			16		3	4	4	5	11	9	1
FALSE	High	Master Protein	P83563	Allergen Api m 6.03 / Api m 6.04 OS=Apis mellifera OX=7460 PE=1 SV=2	0	FALSE		19.122	36	4	54	4	92	9.8	9.69		0		15.76	1.63	0	5.45	0	0	0	0					8.29	0		1		3	1	1	3	1	1	2	2					2	1
FALSE	High	Master Protein	A0A087ZVF4	Alpha-1,4 glucan phosphorylase OS=Apis mellifera OX=7460 GN=GlyP PE=3 SV=1	0	FALSE		99.204	35	22	77	22	844	97.3	6.37	20.06			0	4.27	10.25		0	1.97		1.77	1.68	11.95	45.05	10.02	6.48		11			1	3	5		6	1		5	1	6	14	3	10
FALSE	High	Master Protein	A0A088ATP0	Alpha-carbonic anhydrase domain-containing protein OS=Apis mellifera OX=7460 GN=727237 PE=3 SV=1	0	FALSE		4.739	6	1	1	1	343	38.6	5.35					1.63																	1
FALSE	High	Master Protein	A0A088A332	Alpha-galactosidase OS=Apis mellifera OX=7460 PE=3 SV=1	0.008	FALSE		2.707	3	1	2	1	388	44.6	5.3																0	1.62																1	1
FALSE	High	Master Protein	Q25BT8	Alpha-glucosidase OS=Apis mellifera OX=7460 GN=hbg1 PE=4 SV=1	0	FALSE		38.761	25	11	28	11	588	67.3	6.61	2.61					2.84		21.16			0	2.9				8.46		1					1		9			1	1				7
FALSE	High	Master Protein	Q25BT7	Alpha-glucosidase OS=Apis mellifera OX=7460 GN=hbg2 PE=4 SV=1	0	FALSE		160.951	36	19	154	19	580	66.5	6.28	60.47		11.74	15.36		6.77	1.65	141.58			15.34	10.82	5.51		5.49	12.25	12.86	12		3	7		2	1	19			9	3	2		2	4	10
FALSE	High	Master Protein	Q17058	Alpha-glucosidase OS=Apis mellifera OX=7460 PE=1 SV=1	0	FALSE		100.075	49	17	94	17	567	65.5	5.24	17.07					13.21		9.98				0				90.08	4.56	10					8		6				3				16	5
FALSE	High	Master Protein	A0A088APY3	Amidase domain-containing protein OS=Apis mellifera OX=7460 GN=LOC408742 PE=4 SV=1	0	FALSE		171.32	60	20	189	20	536	60.1	8.76			39.22		72.34	12.61			109.51		0	19.63	37.83	56.88	99.09	23.26	2.86			9		12	7			14		1	10	7	7	12	10	1
FALSE	High	Master Protein	A0A088A8Y7	Amidase domain-containing protein OS=Apis mellifera OX=7460 PE=4 SV=1	0	FALSE		29.76	16	6	14	6	540	60.9	7.93			0		0				10.8			1.77		5.12	8.96					1		1				5			1		2	3
FALSE	High	Master Protein	A0A088ABQ0	Amidase domain-containing protein OS=Apis mellifera OX=7460 PE=4 SV=1	0	FALSE		32.592	18	6	15	6	496	55.4	8.81					7.13				19.72			0	0		7.53							2				5			1	1		3
FALSE	High	Master Protein	A0A088ALH3	Amidohydro-rel domain-containing protein OS=Apis mellifera OX=7460 PE=4 SV=1	0	FALSE		29.667	16	8	12	8	688	74.9	6.23				2.5		1.79		0				0	5.9			2.97					3		1		2				1	2			2
FALSE	High	Master Protein	A0A0G8BDU3	Amino acid ABC transporter substrate-binding protein OS=Serratia marcescens OX=615 GN=BVG93_04190 PE=3 SV=1	0	FALSE	Bacteria	15.878	19	3	4	3	247	27	8.78								9.69																	3
FALSE	High	Master Protein	Q9XZJ1	Amino acid transporter OS=Apis mellifera OX=7460 GN=EAAT PE=2 SV=1	0	FALSE		5.728	5	2	2	2	543	59.1	5.97				1.99																	2
FALSE	High	Master Protein	A0A088A150	Amino acid transporter OS=Apis mellifera OX=7460 GN=LOC409919 PE=3 SV=1	0	FALSE		48.792	14	6	41	6	503	54.6	6.65			24.69	2.43	5.67	4.06			7.13			2.28	14.79	3.08	8.73					5	2	2	2			3			1	4	1	3
FALSE	High	Master Protein	A0A088A624	Amino acid transporter OS=Apis mellifera OX=7460 PE=3 SV=1	0	FALSE		53.225	27	9	43	9	486	52.9	6.57	4.55		11.63		14.33	6.07			24.67	1.9		4.89	12.33		18.05	2.1		2		3		4	4			7	1		2	2		3	1
FALSE	High	Master Protein	A0A093SPY6	Amino acid transporter OS=Pectobacterium carotovorum subsp. carotovorum OX=555 GN=KP17_06275 PE=4 SV=1	0	FALSE	Bacteria	14.852	8	2	11	1	298	33	8.54								11.99			5.15					0									2			2					1
FALSE	High	Master Protein	A0A088AF33	Amino_oxidase domain-containing protein OS=Apis mellifera OX=7460 GN=LOC413478 PE=4 SV=1	0	FALSE		67.848	34	11	50	11	500	57.1	5.38	26.82			0	9.25	2.86	2.04	42.34				0				0	1.72	6			1	3	2	1	11				1				1	5
FALSE	High	Master Protein	A0A087ZWN2	Aminopeptidase OS=Apis mellifera OX=7460 GN=LOC409077 PE=3 SV=1	0	FALSE		8.406	2	2	2	2	973	112.5	5.71				4.48																	2
FALSE	High	Master Protein	A0A087ZUG8	Aminopeptidase OS=Apis mellifera OX=7460 GN=LOC412808 PE=3 SV=1	0	FALSE		31.155	15	10	27	9	982	112.4	7.15			7.55		4.25	7.54	0	7.19	0		2.61		3.62		3	4.04	3.84			5		3	4	1	1	2		1		3		1	1	1
FALSE	High	Master Protein	A0A087ZUB3	Aminopeptidase OS=Apis mellifera OX=7460 GN=LOC551180 PE=3 SV=1	0	FALSE		59.061	23	17	40	16	928	108	6.76			2.83			2.68	0	23.65			2.61				3	6.11	5.48			1			1	1	15			4				1	3	3
FALSE	High	Master Protein	A0A087ZTK0	Aminopeptidase OS=Apis mellifera OX=7460 GN=Psa PE=3 SV=1	0	FALSE		51.874	19	12	19	12	867	98.5	5.54	0							0	5.27				4.14	2.4	3.28	9.88		2							2	2				3	1	1	8
FALSE	High	Master Protein	A0A087ZWR8	Aminopeptidase OS=Apis mellifera OX=7460 PE=3 SV=1	0	FALSE		7.196	3	2	3	2	971	111.2	5.2			3.04																	2
FALSE	High	Master Protein	A0A087ZNZ2	Aminotran_1_2 domain-containing protein OS=Apis mellifera OX=7460 GN=LOC409196 PE=4 SV=1	0	FALSE		72.422	43	16	48	16	543	60.8	8.32	22.27		2.78			5.09		2.38	2.16		1.82	0	13.12	22.09	10.68	1.74		8		1			2		3	3		2	1	7	7	5	2
FALSE	High	Master Protein	A0A088A6R0	Aminotran_1_2 domain-containing protein OS=Apis mellifera OX=7460 PE=4 SV=1	0.01	FALSE		2.469	9	1	1	1	141	16.6	5.63														0																	1
FALSE	High	Master Protein	A0A088ADX3	Aminotran_5 domain-containing protein OS=Apis mellifera OX=7460 GN=LOC412670 PE=3 SV=1	0	FALSE		7.457	11	3	4	3	371	41.4	8.15								0								1.71	0								1								2	1
FALSE	High	Master Protein	A0A088AJ72	AMP-binding domain-containing protein OS=Apis mellifera OX=7460 GN=bgm PE=4 SV=1	0	FALSE		148.073	37	21	97	21	687	76.9	7.36	11.51		10.34		34.53	7.26			37.56			0	8.18	7.85	69.91	14.4	2.02	6		5		11	5			10			1	5	4	13	10	2
FALSE	High	Master Protein	A0A087ZV52	AMP-binding domain-containing protein OS=Apis mellifera OX=7460 GN=LOC409515 PE=4 SV=1	0	FALSE		93.026	30	18	98	18	715	80.8	8.32	5.05		21.34	4.72	18.13	4.15			39.95			5.45	14.95	15.26	34.21	6.39		3		8	6	8	4			13			5	7	5	12	4
FALSE	High	Master Protein	A0A088AEI4	AMP-binding domain-containing protein OS=Apis mellifera OX=7460 GN=LOC412541 PE=4 SV=1	0	FALSE		36.436	12	6	13	6	657	73.5	8.07					2.01				7.59				1.79		12.08							2				2				2		4
FALSE	High	Master Protein	A0A087ZYX1	AMPKBI domain-containing protein OS=Apis mellifera OX=7460 GN=alc PE=4 SV=1	0	FALSE		6.576	9	2	2	2	283	31.8	7.25									2.73							0										1							1
FALSE	High	Master Protein	A0A087ZNG8	ANAPC4_WD40 domain-containing protein OS=Apis mellifera OX=7460 GN=100576146 PE=4 SV=1	0	FALSE		5.414	3	1	1	1	527	59.3	6.68															2.23																	1
FALSE	High	Master Protein	Q4PKR8	Anarchy 1 OS=Apis mellifera OX=7460 PE=2 SV=1	0	FALSE		39.179	25	9	17	9	495	55.6	6.54				17.88					1.48												8					1
FALSE	High	Master Protein	A0A087ZRC1	Angiotensin-converting enzyme OS=Apis mellifera OX=7460 PE=3 SV=1	0	FALSE		8.63	9	3	3	3	621	72.6	5.97								1.76																	3
FALSE	High	Master Protein	A0A2G4P5E8	Anhydro-N-acetylmuramic acid kinase OS=Serratia marcescens OX=615 GN=anmK PE=3 SV=1	0.005	FALSE	Bacteria	3.665	5	1	18	1	373	39.6	5.5	0		0		0	0	0		0			0						1		1		1	1	1		1			1
FALSE	High	Master Protein	A0A088APR9	ANK_REP_REGION domain-containing protein OS=Apis mellifera OX=7460 GN=LOC551350 PE=4 SV=1	0	FALSE		23.798	41	3	18	3	124	13.8	5.3	4.45					2.34		11.95			2.18	0		3.04		7.06	4.56	1					1		3			2	1		1		3	2
FALSE	High	Master Protein	A0A088ANW7	ANK_REP_REGION domain-containing protein OS=Apis mellifera OX=7460 PE=3 SV=1	0.01	FALSE		2.545	2	1	1	1	628	71.5	6.11				0																	1
FALSE	High	Master Protein	A0A087ZQN0	ANK_REP_REGION domain-containing protein OS=Apis mellifera OX=7460 PE=4 SV=1	0.008	FALSE		2.753	2	1	1	1	801	88.7	5.6															2.1																	1
FALSE	High	Master Protein	A0A088A1W4	Annexin OS=Apis mellifera OX=7460 GN=LOC409068 PE=3 SV=1	0	FALSE		49.491	27	11	39	11	508	56.5	5.55	11.09		0	0		0			1.85		2.08		17.11	6.49	23.23	10.43		6		1	1		1			1		2		7	2	5	5
FALSE	High	Master Protein	A0A088AJH1	Annexin OS=Apis mellifera OX=7460 GN=LOC409533 PE=3 SV=1	0	FALSE		160.492	76	22	197	21	323	35.9	4.74	38.24		22.16	33.32	19.18	41.52	0	34.09	28.43	8.43	6.71	19.05	28	66.97	15.87	49.05	11.5	9		5	13	7	10	2	11	7	6	4	6	7	13	3	12	6
FALSE	High	Master Protein	A0A087ZR92	Annexin OS=Apis mellifera OX=7460 PE=3 SV=1	0	FALSE		94.046	61	15	115	14	323	35.7	5.48	12.9		13.77	12.91	12.13	9.86	0	1.92	5.62	7.98	0	6.22	18.14	39.05	41.32	8.07	0	6		3	8	4	5	1	2	4	4	1	4	8	8	9	6	4
FALSE	High	Master Protein	Q8I6X7	Antennal-specific protein 3c OS=Apis mellifera OX=7460 GN=ASP3c PE=2 SV=1	0	FALSE		67.737	62	12	301	12	130	14.9	7.68	57.62	12.14	12.87	35.21	25.48	20.16	4.56	57.31	19.48	20.49	13.31	24.8	3.99	25.61	7.12	20.9	102.95	8	3	7	7	7	5	1	9	4	4	3	6	4	4	1	6	7
FALSE	High	Master Protein	A0A088AH86	AP complex subunit beta OS=Apis mellifera OX=7460 PE=3 SV=1	0	FALSE		19.245	9	6	8	6	918	101.3	5.27			0	0		1.74			0					0	1.68	0				1	1		1			1					1	1	1
FALSE	High	Master Protein	A0A088APJ2	AP-2 complex subunit alpha OS=Apis mellifera OX=7460 GN=alpha-Adaptin PE=3 SV=1	0	FALSE		11.029	5	3	3	3	937	104.9	7.21				0					0						3.16						1					1						1
FALSE	High	Master Protein	P01500	Apamin OS=Apis mellifera OX=7460 PE=1 SV=2	0.007	FALSE		3.201	20	1	6	1	46	5.2	8.4				8.43							4.05										1							1
FALSE	High	Master Protein	A0A088ANC5	APD-3-like protein; Apidermin 1-like protein; Apidermin 3-like protein OS=Apis mellifera OX=7460 GN=apd-3 PE=4 SV=1	0	FALSE		108.767	29	6	398	6	275	24.2	7.56	1163.14	25.09	18.68	8.76	23.99	5.52	13.42	21.21		8.06	0	1.89	10.53		23.35	2.19	13.79	6	3	3	3	3	1	2	2		2	1	1	2		2	1	2
FALSE	High	Master Protein	B0LUE8	Apolipophorin-III-like protein OS=Apis mellifera OX=7460 GN=A4 PE=2 SV=1	0	FALSE		80.097	66	7	292	7	193	21.3	5.66	144.66	57.18	30.08	22.36	65.6	28.98	31.56	104.81	1.94	66.98	25.78	25.23	11.1	7.23	30.91	50.85	64.25	7	6	5	4	6	4	6	6	2	5	5	4	2	3	5	5	5
FALSE	High	Master Protein	A0A221H6M5	Arginine ABC transporter substrate-binding protein OS=Serratia marcescens OX=615 GN=BVG84_04945 PE=3 SV=1	0	FALSE	Bacteria	8.88	13	2	2	2	243	26.8	7.27								5.84																	2
FALSE	High	Master Protein	A0A088ARZ8	Arginine kinase OS=Apis mellifera OX=7460 PE=3 SV=1	0	FALSE		313.654	68	33	829	33	383	43.4	6.55	193.32	0	2.83	154.3	73.54	108.72	25.46	157.24	114.74	12.65	112.2	104.41	99.84	239.05	89.65	133.69	8.18	21	1	1	23	18	21	10	22	21	9	22	19	19	27	18	26	8
FALSE	High	Master Protein	A0A087ZUT4	Arrestin_C domain-containing protein OS=Apis mellifera OX=7460 GN=409006 PE=4 SV=1	0	FALSE		12.972	11	3	3	3	492	54.2	5.62	5.81					2.23												2					1
FALSE	High	Master Protein	A0A088AH00	Arrestin_C domain-containing protein OS=Apis mellifera OX=7460 GN=ArrL2 PE=4 SV=1	0	FALSE		32.476	34	8	16	8	338	37.7	8.81			14.65			2.12	2.23								2.56					3			1	6								1
FALSE	High	Master Protein	A0A0A5LVI8	Asparagine--tRNA ligase OS=Serratia marcescens OX=615 GN=asnS PE=3 SV=1	0.006	FALSE	Bacteria	3.453	3	1	1	1	466	52.2	5.15								0																	1
FALSE	High	Master Protein	A0A088A4B2	Aspartate aminotransferase OS=Apis mellifera OX=7460 GN=Got2 PE=4 SV=1	0	FALSE		58.658	30	10	25	10	429	48	9.22			6.61			0		2.63				0	9.88	22.32		8.87	0			3			1		1				1	4	4		5	2
FALSE	High	Master Protein	A0A088ASL4	Aspartate aminotransferase OS=Apis mellifera OX=7460 PE=4 SV=1	0	FALSE		64.97	48	10	72	10	365	41.5	7.24	19.13		7.49	14.14	6.92	29.46	5.61	22.06	10.7	2.56	6.26	8.53	1.9	17.89		12.54	0	4		2	6	3	6	3	8	3	1	3	4	1	3		5	2
FALSE	High	Master Protein	M9SXX0	ATP synthase alpha subunit (Fragment) OS=Lactobacillus apis OX=303541 GN=atpA PE=4 SV=1	0	FALSE		18.349	8	2	126	1	303	32.8	5.06	19.96		20.67	18.81	21.71	15.35	13.84	4.52	14.99	7.56	4.12	14.86	51.84	65.89	70.06	4.5		1		2	1	1	1	1	1	1	1	1	1	1	1	1	1
FALSE	High	Master Protein	Q0GKR1	ATP synthase beta subunit (Fragment) OS=Serratia marcescens OX=615 GN=atpD PE=3 SV=1	0	FALSE	Bacteria	48.062	31	9	19	1	421	46.1	5.12							2.46	25.25			0													2	9			2
FALSE	High	Master Protein	A0A343ITD7	ATP synthase subunit a OS=Apis mellifera syriaca OX=279977 PE=4 SV=1	0	FALSE		8.346	8	2	25	2	226	26.6	8.94	2.43		3.81		8.26	3.98			11.27	1.92		1.91	0					1		2		2	2			2	1		2	1
FALSE	High	Master Protein	A0A087ZQI5	ATP synthase subunit alpha OS=Apis mellifera OX=7460 GN=Atp5a1 PE=3 SV=1	0	FALSE		307.949	62	30	1064	29	547	59.5	8.9	208.79	1.69	229.9	169.21	267.44	154.41	112.94	23.29	194.48	45.85	33.9	134.6	298.02	473.05	447.84	118.59	9.71	22	1	23	20	24	19	18	11	21	14	12	19	18	21	22	19	5
FALSE	High	Master Protein	A0A2G4QH48	ATP synthase subunit alpha OS=Serratia marcescens OX=615 GN=atpA PE=3 SV=1	0	FALSE	Bacteria	32.861	18	7	132	6	513	55.3	6.48	19.96		17.81	18.81	21.71	15.35	13.84	14.48	14.99	7.56	4.12	14.86	51.84	65.89	70.06	4.5		1		1	1	1	1	1	7	1	1	1	1	1	1	1	1
FALSE	High	Master Protein	A0A093S4E2	ATP synthase subunit b OS=Pectobacterium carotovorum subsp. carotovorum OX=555 GN=atpF PE=3 SV=1	0.009	FALSE	Bacteria	2.65	8	1	1	1	156	17.3	6.83								0																	1
FALSE	High	Master Protein	A0A088AMB8	ATP synthase subunit beta OS=Apis mellifera OX=7460 GN=Atp5b PE=3 SV=1	0	FALSE		616.709	82	33	2033	33	516	55.1	5.41	410.14	13.8	441.29	458.45	585.7	405.54	241.11	68.56	431	149.25	82	361.8	656.73	689.53	751.11	233.36	46.76	27	11	26	27	27	28	25	21	28	23	21	28	26	31	31	27	14
FALSE	High	Master Protein	A0A087ENJ2	ATP synthase subunit beta OS=Lactobacillus kunkeei OX=148814 GN=atpD PE=3 SV=1	0	FALSE		14.879	8	3	20	2	468	50.9	4.75				10.18	16.86	6.35	3.07	1.84				5.77									2	2	2	2	1				2
FALSE	High	Master Protein	A0A093SJJ8	ATP synthase subunit beta OS=Pectobacterium carotovorum subsp. carotovorum OX=555 GN=atpD PE=3 SV=1	0	FALSE	Bacteria	49.246	30	10	18	2	460	50.2	5							2.46	27.68			0													2	10			2
FALSE	High	Master Protein	A0A093TQ71	ATP synthase subunit c OS=Pectobacterium carotovorum subsp. carotovorum OX=555 GN=atpE PE=3 SV=1	0	FALSE	Bacteria	4.354	20	2	7	2	79	8.2	4.61	1.72							3.83			0					0		1							2			1					1
FALSE	High	Master Protein	A0A087ZS51	ATP synthase subunit d, mitochondrial OS=Apis mellifera OX=7460 GN=ATPsyn-d PE=3 SV=1	0	FALSE		133.592	79	15	351	15	174	20.3	5.12	72.73		88.51	40.96	100.45	73.77	31.66	2.71	70.37	16.57	25.95	68.2	57.37	50.32	85.9	19.75	0	9		9	8	12	12	10	3	12	7	9	12	10	7	10	6	1
FALSE	High	Master Protein	A0A088ACY7	ATP synthase subunit gamma OS=Apis mellifera OX=7460 GN=Atp5c1 PE=3 SV=1	0	FALSE		114.423	51	15	284	15	296	32.8	9.42	41.05		84.11	56.49	96.03	43.34	22.13	0	65.86	3.89	0	41.4	65.06	49.89	97.64	5.6		12		12	13	12	9	8	1	11	2	1	8	9	11	11	5
FALSE	High	Master Protein	A0A088A2G0	ATP synthase subunit OS=Apis mellifera OX=7460 PE=3 SV=1	0	FALSE		24.156	40	5	117	5	107	12.2	9.83	19.59		25.73	15.78	31.26	15.03	7.8		13.14	5.45		10.73	15.96	4.21	19.05	12.11	1.66	5		5	4	5	4	3		5	2		4	5	2	4	4	2
FALSE	High	Master Protein	A0A087ZY48	ATPase ASNA1 homolog OS=Apis mellifera OX=7460 GN=LOC409264 PE=3 SV=1	0	FALSE		21.559	23	5	9	5	339	38.3	5.29			2.49								2.43		0	2.21		1.81				2								3		1	1		1
FALSE	High	Master Protein	A0A088ARD2	ATP-citrate synthase OS=Apis mellifera OX=7460 GN=ATPCL PE=3 SV=1	0	FALSE		397.5	68	52	314	52	1086	120	7.74	38.87		27.47	1.86	21.42	11.99		1.82	197.3		13.61	21.88	26.47	120.01	140.87	48.37	0	14		10	1	7	7		4	43		10	10	11	21	26	22	1
FALSE	High	Master Protein	A0A087ZNI5	ATP-dependent (S)-NAD(P)H-hydrate dehydratase OS=Apis mellifera OX=7460 PE=3 SV=1	0	FALSE		6.683	9	2	3	2	350	38.4	9.28						0			2.55							0							1			1							1
FALSE	High	Master Protein	A0A093SM73	ATP-dependent 6-phosphofructokinase OS=Pectobacterium carotovorum subsp. carotovorum OX=555 GN=pfkA PE=3 SV=1	0	FALSE	Bacteria	5.319	8	2	2	1	320	34.9	5.6								0																	2
FALSE	High	Master Protein	A0A084WZB2	ATP-dependent 6-phosphofructokinase OS=Serratia marcescens OX=615 GN=pfkA PE=3 SV=1	0	FALSE	Bacteria	4.354	6	2	2	1	320	35.1	5.6								0																	2
FALSE	High	Master Protein	A0A087ZVI9	ATP-dependent Clp protease proteolytic subunit OS=Apis mellifera OX=7460 GN=LOC409011 PE=3 SV=1	0	FALSE		5.991	6	1	4	1	237	26.3	8.63	0												2.41		4.61			1												1		1
FALSE	High	Master Protein	A0A087ZZ68	ATP-grasp_2 domain-containing protein OS=Apis mellifera OX=7460 PE=4 SV=1	0	FALSE		7.501	7	2	3	2	322	36.1	5.66	2.11															1.67		1															2
FALSE	High	Master Protein	A0A087ZNZ7	ATP-synt_C domain-containing protein OS=Apis mellifera OX=7460 GN=ATP5G2 PE=3 SV=1	0	FALSE		4.807	22	1	1	1	142	15	9.8													0																	1
FALSE	High	Master Protein	A0A088AHV3	ATP-synt_DE_N domain-containing protein OS=Apis mellifera OX=7460 GN=Atp5d PE=3 SV=1	0	FALSE		77.539	77	8	100	8	161	17.6	5.17	15.17		15.73	20.65	36.76	6.09	7.79		24.17	0		23.74	0	35.81	12.11	3.68		4		5	6	7	4	5		5	2		7	1	4	3	4
FALSE	High	Master Protein	A1YZD6	Autonomous glycyl radical cofactor OS=Serratia marcescens OX=615 GN=grcA PE=3 SV=1	0	FALSE	Bacteria	7.794	24	3	5	2	126	14.3	5.12								6.11			0														3			1
FALSE	High	Master Protein	A0A088APR0	Bac_surface_Ag domain-containing protein OS=Apis mellifera OX=7460 GN=LOC413450 PE=4 SV=1	0	FALSE		42.668	23	10	51	10	483	54	9.09	2.2		18.57	3.96	16.99	9.48			11.3	0		9.4	8.73		4.43	0		2		7	3	6	3			3	1		4	5		2	1
FALSE	High	Master Protein	A0A088AC81	BAR domain-containing protein OS=Apis mellifera OX=7460 GN=endoB PE=4 SV=1	0	FALSE		8.635	12	3	4	3	314	35.1	6.34	0			0								0						1			1								2
FALSE	High	Master Protein	A0A088A3V9	Beta-galactosidase OS=Apis mellifera OX=7460 GN=LOC725756 PE=3 SV=1	0	FALSE		27.924	15	6	13	6	644	73	6.38	4.99			0				6.64			0						2.14	2			2				5			1						2
FALSE	High	Master Protein	A0A088AJN6	Beta-glucuronidase OS=Apis mellifera OX=7460 GN=LOC409814 PE=3 SV=1	0	FALSE		36.517	23	12	17	12	669	76.9	6.11	1.94		8.11		0				4.97	0				2.19	7.12	0	0	1		4		2				3	1				1	3	1	1
FALSE	High	Master Protein	A0A087ZUU5	Beta-hexosaminidase OS=Apis mellifera OX=7460 PE=3 SV=1	0	FALSE		81.836	41	15	50	15	541	61.3	6.99	27.2			0	2.46			32.07			2.36					1.61	2.05	10			1	2			13			1					3	3
FALSE	High	Master Protein	A0A087ZYM4	BPL/LPL catalytic domain-containing protein OS=Apis mellifera OX=7460 GN=411759 PE=4 SV=1	0	FALSE		5.021	4	2	2	2	981	111.4	5.94				0																	2
FALSE	High	Master Protein	A0A088ANI4	BRO1 domain-containing protein OS=Apis mellifera OX=7460 GN=ALiX PE=4 SV=1	0	FALSE		40.688	15	10	17	10	816	91.6	5.77	6.61					2.13			0				1.88	2.42	5	2.36		5					2			2				2	2	2	2
FALSE	High	Master Protein	A0A088ALI7	BSD domain-containing protein OS=Apis mellifera OX=7460 GN=726924 PE=4 SV=1	0	FALSE		5.871	5	2	4	2	438	47.4	4.56				2.14						0											2						1
FALSE	High	Master Protein	A0A088ABD2	BTB domain-containing protein OS=Apis mellifera OX=7460 PE=4 SV=1	0	FALSE		5.243	3	1	7	1	429	48.7	9.17	4.02				4.34	2.41			2.46	0								1				1	1			1	1
FALSE	High	Master Protein	A0A087ZXG5	C1q-like venom protein OS=Apis mellifera OX=7460 PE=4 SV=1	0	FALSE		7.993	12	2	5	2	177	18.7	8.4								4.29								1.98	1.67								2								1	1
FALSE	High	Master Protein	A0A088AWA1	C2 domain-containing protein OS=Apis mellifera OX=7460 GN=LOC724498 PE=4 SV=1	0	FALSE		47.366	43	13	37	13	409	46	9.61	0	0	1.7	0	23.66	6.59			5.06	9.33			0					1	1	1	1	11	3			4	7			1
FALSE	High	Master Protein	A0A087ZTJ1	C2H2-type domain-containing protein OS=Apis mellifera OX=7460 GN=LOC408565 PE=4 SV=1	0	FALSE		6.798	3	2	2	2	761	85.7	6.71									0					2.2												1					1
FALSE	High	Master Protein	A0A087ZQ49	CAAX prenyl protease OS=Apis mellifera OX=7460 GN=LOC551466 PE=3 SV=1	0	FALSE		15.006	11	4	8	4	442	52.1	7.77	0		1.86		1.86				4.25						4.44			1		1		2				2						2
FALSE	High	Master Protein	A0A088AAI1	Calcium load-activated calcium channel OS=Apis mellifera OX=7460 GN=LOC552501 PE=3 SV=1	0	FALSE		13.876	16	2	16	2	183	21.1	9.6	0		8.62	0	5.22	6.66			10.4	0		3.03	0	1.68				1		1	1	1	1			1	1		1	1	1
FALSE	High	Master Protein	A0A088ACZ9	Calcium-transporting ATPase OS=Apis mellifera OX=7460 GN=LOC410371 PE=3 SV=1	0	FALSE		679.324	59	63	1719	63	1002	110	5.64	224.05		245.72	0	580.18	380.16	297.22		595.58	40.93	6.84	210.26	557.29	365.9	758.48	88.99		38		35	1	51	46	45		54	24	7	42	42	31	46	30
FALSE	High	Master Protein	A0A087ZYD1	Calcium-transporting ATPase OS=Apis mellifera OX=7460 PE=3 SV=1	0	FALSE		334.434	44	37	315	37	1080	119.2	8.24	11.79		90.59	2.79	135.61	45.91	11.76		103.14	0		37.53	96.48	62.38	200.72	18.54		6		19	2	22	13	5		26	2		14	24	16	30	6
FALSE	High	Master Protein	A0A088ADK9	Calmodulin kinase II OS=Apis mellifera OX=7460 PE=4 SV=1	0	FALSE		24.262	13	4	7	4	576	64.3	7.68									9.77					4.05												3					2
FALSE	High	Master Protein	A0A088AF78	Calponin OS=Apis mellifera OX=7460 GN=LOC408532 PE=3 SV=1	0	FALSE		103.667	66	12	317	11	169	19.1	8.4	96.45	0	53.76	1.76	40.89	95.02	10.04	31.22	28.75	34.69	45.29	72.83	52.24	59.27	25.68	54.37	0	10	3	8	4	10	10	6	8	5	8	8	10	6	7	5	8	1
FALSE	High	Master Protein	A0A088AF68	Calponin OS=Apis mellifera OX=7460 PE=3 SV=1	0	FALSE		18.472	39	5	8	4	153	17.1	9.22	3.78					1.26				0				0		0		3					1				1				1		2
FALSE	High	Master Protein	A0A088AIY0	Calponin-homology (CH) domain-containing protein OS=Apis mellifera OX=7460 PE=4 SV=1	0	FALSE		68.129	11	13	50	13	1514	172.3	7.97	7.53		14.73		0	14.34			10.47		2.46	10.85	5.34	2.78	11.17			4		3		2	7			5		2	5	3	1	5
FALSE	High	Master Protein	A0A087ZYV0	Calponin-homology (CH) domain-containing protein OS=Apis mellifera OX=7460 PE=4 SV=1	0	FALSE		165.232	30	30	68	30	1316	152.5	6.77	0		6.27			2.4	99.45						4.81		14.63			2		4			1	30						2		4
FALSE	High	Master Protein	A0A087ZP00	Calreticulin OS=Apis mellifera OX=7460 GN=Crc PE=3 SV=1	0	FALSE		96.291	43	13	66	13	403	47.1	4.6	12.66		7.01	0				4.53	8.51		3.92	2.43	9.91	46.4	27.47	13.74	0	5		3	1				5	2		3	1	4	9	5	8	2
FALSE	High	Master Protein	Q6ZXJ1	cAMP-dependent protein kinase type II regulatory chain OS=Apis mellifera carnica OX=88217 GN=pkar2 PE=2 SV=1	0	FALSE		105.946	69	17	95	17	383	43.8	5	24.44		0	6.31	0	50.22		0	21.39	1.62	7.98	18.12	6.59	23.03	24.37	8.61		8		2	3	1	12		1	5	2	6	5	2	10	8	5
FALSE	High	Master Protein	A0A088AEZ5	CAP-Gly domain-containing protein OS=Apis mellifera OX=7460 PE=4 SV=1	0	FALSE		8.865	2	2	2	2	1266	142.1	6.01															1.78																	2
FALSE	High	Master Protein	A0A088AUR2	Caprin-1_dimer domain-containing protein OS=Apis mellifera OX=7460 GN=LOC409086 PE=4 SV=1	0.006	FALSE		3.419	2	1	1	1	668	74.7	5.74																0																	1
FALSE	High	Master Protein	A0A088A5D7	Carboxylic ester hydrolase OS=Apis mellifera OX=7460 GN=552229 PE=3 SV=1	0	FALSE		21.026	12	5	6	5	553	61.7	4.74	11.03					1.83												5					1
FALSE	High	Master Protein	A0A087ZWF0	Carboxylic ester hydrolase OS=Apis mellifera OX=7460 GN=AChE-1 PE=2 SV=1	0.001	FALSE		3.997	3	1	1	1	657	73.9	6.05				2.12																	1
FALSE	High	Master Protein	A0A087ZXF6	Carboxylic ester hydrolase OS=Apis mellifera OX=7460 GN=LOC406105 PE=3 SV=1	0	FALSE		9.884	10	4	4	4	527	59.6	5.81							0																	4
FALSE	High	Master Protein	A0A088AKG2	Carboxylic ester hydrolase OS=Apis mellifera OX=7460 GN=LOC408395 PE=3 SV=1	0	FALSE		34.84	13	6	22	6	582	65.6	8.16	8.88		2.43						1.99		0		4.65	13.37	10.99	2.12		4		1						1		1		3	4	3	3
FALSE	High	Master Protein	A0A088A7H8	Carboxylic ester hydrolase OS=Apis mellifera OX=7460 GN=LOC409171 PE=3 SV=1	0	FALSE		88.82	44	19	162	19	538	61.2	6.71	34.49		8.85	7.55	4.89	15.42	0	19.22	22.14	2.32	8.18	20.26	20.39	49.06	9.21	35.28	2.21	11		4	7	3	6	2	9	7	4	8	10	11	9	5	13	5
FALSE	High	Master Protein	A0A088AQ81	Carboxylic ester hydrolase OS=Apis mellifera OX=7460 GN=LOC409801 PE=3 SV=1	0	FALSE		57.73	32	14	60	14	572	65.2	6.54	32.44			4.7			0	10.7		14.85		3.39				6.24	13.89	11			5			3	6		7		2				5	7
FALSE	High	Master Protein	A0A088A9C3	Carboxylic ester hydrolase OS=Apis mellifera OX=7460 GN=LOC726134 PE=3 SV=1	0.004	FALSE		3.731	2	1	1	1	527	58.7	7.46								0																	1
FALSE	High	Master Protein	A0A087ZN44	Carboxypeptidase OS=Apis mellifera OX=7460 PE=3 SV=1	0	FALSE		55.882	28	9	84	9	409	46.8	8.85	22.23		18.47	3.61	14.51	8.63	1.81	13.8	18.09	2.38	4.61	9.82	4.33	9.2	12.51	8.37	5.65	6		6	1	4	3	1	7	6	2	3	3	1	2	4	3	3
FALSE	High	Master Protein	A0A088A7X0	Carn_acyltransf domain-containing protein OS=Apis mellifera OX=7460 PE=3 SV=1	0	FALSE		38.428	17	10	18	10	662	76.8	8.72			7.06		2.3	0			5.29				0	0	9.03	0				4		3	1			3				2	1	3	1
FALSE	High	Master Protein	A0A088AP68	Carrier domain-containing protein OS=Apis mellifera OX=7460 GN=LOC412815 PE=4 SV=1	0	FALSE		515.588	45	79	347	79	2388	264.3	6.52	13.92		9.43		0	25.63		2.34	234.86			0	57.54	146.59	193.18	53.19	0	12		5		2	12		2	56			1	27	31	45	34	3
FALSE	High	Master Protein	A0A088ACC2	Casein kinase II subunit beta OS=Apis mellifera OX=7460 GN=CkIIbeta PE=3 SV=1	0	FALSE		23.677	26	4	8	4	227	26.2	6.09						2.27			6.12				4.94	2.44									1			2				2	1
FALSE	High	Master Protein	Q6S974	Catalase (Fragment) OS=Apis mellifera ligustica OX=7469 PE=2 SV=1	0	FALSE		31.6	39	6	40	1	182	21.4	6.89	0		4.6		0	15.66			14.98				0	2.29	9.71	0		2		3		1	5			3				2	2	2	2
FALSE	High	Master Protein	A0A087ZRK9	Catalase OS=Apis mellifera OX=7460 PE=3 SV=1	0	FALSE		133.151	56	19	118	14	489	55.3	8.28	14.78		21.74		2.53	69.69	2.3	2.28	50.05	0		1.89	10.06	6.86	19.04	5.22	2.13	8		7		3	16	2	3	11	1		1	6	5	5	4	4
FALSE	High	Master Protein	A0A0F9YN99	Cdc48-like aaa atpase OS=Nosema ceranae OX=40302 GN=AAJ76_1040006841 PE=3 SV=1	0	FALSE	Nosema	9.977	4	2	4	1	708	78.6	5.72					0				0					4.62								1				1					1
FALSE	High	Master Protein	A0A087ZPQ1	CDP-diacylglycerol--inositol 3-phosphatidyltransferase OS=Apis mellifera OX=7460 GN=LOC411408 PE=3 SV=1	0.007	FALSE		3.169	5	1	1	1	217	24.9	8									2.06																	1
FALSE	High	Master Protein	A0A080V639	Cell division protein FtsZ OS=Serratia marcescens OX=615 GN=ftsZ PE=3 SV=1	0	FALSE	Bacteria	6.536	9	2	2	2	384	40.4	4.82								4.03																	2
FALSE	High	Master Protein	D3XL64	CG8192-PA-like protein (Fragment) OS=Apis mellifera OX=7460 PE=2 SV=1	0	FALSE		74.547	52	11	21	11	316	35.7	7.17	47.7																	11
FALSE	High	Master Protein	A0A1Q5W004	Chaperone protein ClpB OS=Serratia marcescens OX=615 GN=clpB PE=3 SV=1	0	FALSE	Bacteria	7.743	5	3	3	3	857	95.3	5.86								0																	3
FALSE	High	Master Protein	A0A093S5W9	Chaperone protein DnaK OS=Pectobacterium carotovorum subsp. carotovorum OX=555 GN=dnaK PE=2 SV=1	0	FALSE	Bacteria	46.049	18	7	28	6	635	68.9	5	5.05			0	3.28			14.36	6.42		2.6		10.81		6.72	2.93	0	2			1	1			6	1		1		1		1	1	1
FALSE	High	Master Protein	A0A088A199	CHCH domain-containing protein OS=Apis mellifera OX=7460 GN=LOC408308 PE=4 SV=1	0.006	FALSE		3.261	16	1	1	1	147	14.6	8.57														2.51																	1
FALSE	High	Master Protein	Q3LBA7	Chemosensory protein 1 OS=Apis mellifera OX=7460 GN=CSP1 PE=2 SV=1	0	FALSE		8.777	29	2	3	2	116	13.8	5.11								2.16																	2
FALSE	High	Master Protein	Q3LBA8	Chemosensory protein 2 OS=Apis mellifera OX=7460 GN=CSP2 PE=2 SV=1	0	FALSE		5.769	10	1	3	1	117	13	9.07	0				2.04	0												1				1	1
FALSE	High	Master Protein	A0A088APL1	Chitin-binding type-2 domain-containing protein OS=Apis mellifera OX=7460 GN=Cht5 PE=4 SV=1	0	FALSE		10.994	8	4	4	4	605	69	6.19								0																	4
FALSE	High	Master Protein	A0A088AAP6	Chitin-binding type-2 domain-containing protein OS=Apis mellifera OX=7460 GN=LOC413481 PE=4 SV=1	0	FALSE		44.389	17	10	14	10	968	110	5.88	20.96																	10
FALSE	High	Master Protein	A0A088A611	Chitin-binding type-2 domain-containing protein OS=Apis mellifera OX=7460 GN=LOC413705 PE=3 SV=1	0	FALSE		9.27	6	3	7	3	508	56.1	6.95	4.21							5.46										1							3
FALSE	High	Master Protein	A0A088AQI9	Chitin-binding type-2 domain-containing protein OS=Apis mellifera OX=7460 GN=LOC725725 PE=4 SV=1	0	FALSE		34.109	41	2	74	2	96	10.3	4.59	18.2			3.2		0		50.47			19.06	0				40.13	41.48	2			2		1		2			2	1				2	2
FALSE	High	Master Protein	A0A087ZS42	Chitin-binding type-2 domain-containing protein OS=Apis mellifera OX=7460 GN=LOC727129 PE=4 SV=1	0	FALSE		5.647	9	1	2	1	124	14.1	6	5.18																	1
FALSE	High	Master Protein	A0A088A1P6	Chitin-binding type-2 domain-containing protein OS=Apis mellifera OX=7460 GN=serp PE=4 SV=1	0	FALSE		43.272	20	8	14	8	532	60.6	5.08	20.79																	8
FALSE	High	Master Protein	A0A088A1P7	Chitin-binding type-2 domain-containing protein OS=Apis mellifera OX=7460 GN=verm PE=4 SV=1	0	FALSE		25.788	19	7	11	7	549	62.2	5.14	13.31							0					0					4							2					1
FALSE	High	Master Protein	A0A087ZN59	CHK domain-containing protein OS=Apis mellifera OX=7460 GN=LOC408421 PE=4 SV=1	0	FALSE		92.405	51	18	165	18	401	46.5	7.75	19.16		27.03	19.22	0	32.08	1.68	10.31	20.72	2.07	19.58	12.41	25.32	16.84	29.15	28.81	4.22	10		10	10	2	10	1	9	7	4	12	6	9	4	11	13	9
FALSE	High	Master Protein	A0A088AFG5	CHK domain-containing protein OS=Apis mellifera OX=7460 GN=LOC409502 PE=4 SV=1	0	FALSE		6.505	5	2	3	2	427	49.6	7.02				1.83																	2
FALSE	High	Master Protein	A0A088AS57	CHK domain-containing protein OS=Apis mellifera OX=7460 GN=LOC725439 PE=4 SV=1	0	FALSE		17.207	11	3	6	3	417	48.3	6.29	4.09			0						2.65								2			2						1
FALSE	High	Master Protein	P56682	Chymotrypsin inhibitor OS=Apis mellifera OX=7460 PE=1 SV=1	0	FALSE		17.866	84	3	38	3	56	6	4.73	0	0		6.8	0	0		19.43	0							2.09	2.16	1	1		3	1	2		3	1							3	1
FALSE	High	Master Protein	A0A088AKI2	Citrate synthase OS=Apis mellifera OX=7460 GN=LOC410059 PE=3 SV=1	0	FALSE		197.621	59	23	322	23	462	51.9	9	142.46		26.34	7.95	9.16	58.2	0	37.89	70.97	0	72.05	36.58	63.88	149.04	58.01	41.07	5.26	18		8	3	5	14	1	14	11	3	16	11	8	13	11	11	2
FALSE	High	Master Protein	A0A093SP22	Citrate synthase OS=Pectobacterium carotovorum subsp. carotovorum OX=555 GN=gltA PE=3 SV=1	0	FALSE	Bacteria	18.011	12	3	6	1	428	48.1	6.57								12.16																	3
FALSE	High	Master Protein	A0A084WVY8	Citrate synthase OS=Serratia marcescens OX=615 GN=gltA PE=3 SV=1	0	FALSE	Bacteria	19.886	16	3	8	1	430	48.4	6.77								16.51			0														3			1
FALSE	High	Master Protein	A0A1Q5VZC9	Class II fructose-bisphosphate aldolase OS=Serratia marcescens OX=615 GN=A8A12_20100 PE=3 SV=1	0	FALSE	Bacteria	19.653	13	4	7	4	359	39	5.88								8.11																	4
FALSE	High	Master Protein	A0A088AFV6	Clathrin heavy chain OS=Apis mellifera OX=7460 GN=LOC550716 PE=3 SV=1	0	FALSE		200.5	34	40	111	40	1678	192	5.94	0		11.78	1.82	17.02	11.14			59.57			4.52	18.47	24.44	45.96	2.82		1		4	1	10	6			20			2	9	9	11	5
FALSE	High	Master Protein	A0A087ZRM7	Clathrin light chain OS=Apis mellifera OX=7460 GN=Clc PE=3 SV=1	0	FALSE		10.711	15	3	6	3	209	23.5	4.79					4.88								0		5.02							2								1		3
FALSE	High	Master Protein	A0A088A0J5	Cleavage and polyadenylation specificity factor subunit 5 OS=Apis mellifera OX=7460 GN=LOC552140 PE=3 SV=1	0	FALSE		12.458	32	4	5	4	228	26.1	8.85	1.78		2.49						0				0	0				1		1						1				1	1
FALSE	High	Master Protein	A0A087ZNX2	CN hydrolase domain-containing protein OS=Apis mellifera OX=7460 GN=LOC409250 PE=4 SV=1	0.006	FALSE		3.366	5	1	1	1	383	43.4	5.92								0																	1
FALSE	High	Master Protein	A0A088AAA2	CN hydrolase domain-containing protein OS=Apis mellifera OX=7460 GN=LOC413631 PE=4 SV=1	0.005	FALSE		3.68	3	1	1	1	516	59.1	8.54								0																	1
FALSE	High	Master Protein	A0A088ALI4	Coatomer subunit alpha OS=Apis mellifera OX=7460 GN=alphaCop PE=4 SV=1	0	FALSE		18.537	4	3	3	3	1214	137.9	7.36									2.62						7.28											1						2
FALSE	High	Master Protein	A0A088A977	Coatomer subunit beta OS=Apis mellifera OX=7460 GN=betaCop PE=4 SV=1	0	FALSE		5.582	5	2	3	2	949	104.7	6.07									1.66																	2
FALSE	High	Master Protein	A0A088AGY8	Coatomer subunit delta OS=Apis mellifera OX=7460 GN=deltaCOP PE=3 SV=1	0	FALSE		8.609	4	2	3	2	515	57.8	5.62					1.62				2.02						3.41							1				1						1
FALSE	High	Master Protein	A0A088A207	Coatomer subunit epsilon OS=Apis mellifera OX=7460 PE=3 SV=1	0.009	FALSE		2.606	3	1	2	1	300	34.7	5.55															2.25	0																1	1
FALSE	High	Master Protein	A0A088AII7	Coatomer subunit gamma OS=Apis mellifera OX=7460 GN=gammaCop PE=3 SV=1	0	FALSE		25.786	10	5	10	5	876	96.4	5.58	0		0			0			10.17				3.08		2.97			1		1			1			4				1		1
FALSE	High	Master Protein	A0A088ABF6	COesterase domain-containing protein OS=Apis mellifera OX=7460 GN=LOC410187 PE=4 SV=1	0	FALSE		84.857	42	18	94	18	653	73.3	9.1	49.26	53.35	0	9.94	11.8		4.6	13.36		4.91							1.96	12	14	1	6	6		4	8		9							1
FALSE	High	Master Protein	A0A093SQ08	Cold-shock protein OS=Pectobacterium carotovorum subsp. carotovorum OX=555 GN=KP17_06375 PE=4 SV=1	0	FALSE	Bacteria	6.994	32	2	6	2	69	7.4	7.25								8.99																	2
FALSE	High	Master Protein	A0A086FC80	Cold-shock protein OS=Serratia marcescens OX=615 GN=A8A12_02415 PE=4 SV=1	0	FALSE	Bacteria	14.13	42	2	13	2	69	7.4	7.24	1.83							15.54			5.39					0		1							2			2					1
FALSE	High	Master Protein	A0A088A3U7	Collagen IV NC1 domain-containing protein OS=Apis mellifera OX=7460 GN=LOC408551 PE=4 SV=1	0	FALSE		101.969	5	9	310	9	1833	183.2	6.98	39.83		87.72	18.1	15.22	93.97	11.83		78.3			41.44	63.97	7.51	143.91	15.11		9		9	7	6	9	4		9			8	8	2	6	3
FALSE	High	Master Protein	A0A088A3X0	Collagen IV NC1 domain-containing protein OS=Apis mellifera OX=7460 GN=LOC408552 PE=4 SV=1	0	FALSE		275.5	13	20	509	20	1929	190.9	7.09	86.19		184	47.5	45.43	211.41	19		210.57	6.37		74.81	188.5	49.52	311.42	43.43		13		11	9	10	14	4		14	5		10	14	6	12	8
FALSE	High	Master Protein	A0A088A6D6	Complex1_30kDa domain-containing protein OS=Apis mellifera OX=7460 GN=Ndufs3 PE=3 SV=1	0	FALSE		101.272	55	11	127	11	261	30.5	6.06	17.92		34.87	27.49	25.94	27.29	16.91		44.83	4.07	0	21.01	9.17	11.02	36.72	6.89		6		8	5	9	6	4		10	4	1	6	3	4	7	3
FALSE	High	Master Protein	A0A087ZNK1	Complex1_49kDa domain-containing protein OS=Apis mellifera OX=7460 GN=Ndufs2 PE=3 SV=1	0	FALSE		160.132	61	20	148	20	480	55.4	6.76	9.89		34.35	13.23	47.34	38.05	2.34		45.14	0		19.78	11.88	20.98	58.01	19.16		5		9	7	13	9	3		12	1		8	4	8	11	4
FALSE	High	Master Protein	A0A087ZSK9	Coronin OS=Apis mellifera OX=7460 GN=LOC412080 PE=3 SV=1	0	FALSE		17.286	14	6	11	6	494	54.8	6.54						2.01		0				2.2	2.26	5.4		2.53							2		1				1	3	2		1
FALSE	High	Master Protein	A0A088A2Z3	COX assembly mitochondrial protein OS=Apis mellifera OX=7460 GN=Ndufs5 PE=3 SV=1	0	FALSE		19.217	36	4	17	4	106	12.6	6.16	1.65			2.98	5.87	0	2.79		5.31			5.34		4.95	3.44	0		1			1	1	1	2		1			2		2	1	1
FALSE	High	Master Protein	A0A088AI62	COX6C domain-containing protein OS=Apis mellifera OX=7460 GN=Cox6c PE=4 SV=1	0	FALSE		34.055	75	6	80	6	75	8.8	9.16	0		22.75	6.13	13.26	8.09	1.7		31.7	0		4.15	6.5	1.65	9.02	2.37		2		4	4	4	5	2		5	1		3	4	1	3	1
FALSE	High	Master Protein	A0A088A1C5	CRAL-TRIO domain-containing protein OS=Apis mellifera OX=7460 GN=408361 PE=4 SV=1	0	FALSE		46.859	38	10	47	10	306	35.6	8.51	3.02	9.02		4.6	31.12	2.01	5.07		0	5.76			1.75		3.03			4	5		3	9	2	5		1	6			1		1
FALSE	High	Master Protein	A0A088ADH8	CRAL-TRIO domain-containing protein OS=Apis mellifera OX=7460 GN=LOC409740 PE=4 SV=1	0	FALSE		102.34	53	17	164	17	310	36.2	8.59	9.11		15.29	3.96	18.63	21.86		1.78	37.99		25.64	37.52	4.31	31.99	34.9	35.41	21.67	4		5	3	7	7		4	8		9	12	2	7	8	13	8
FALSE	High	Master Protein	A0A088A1P2	CRAL-TRIO domain-containing protein OS=Apis mellifera OX=7460 GN=LOC552447 PE=4 SV=1	0	FALSE		9.929	8	2	4	2	288	34.1	8.62	2.61	1.7					0			1.96								1	1					1			1
FALSE	High	Master Protein	A0A088AC27	CRAL-TRIO domain-containing protein OS=Apis mellifera OX=7460 PE=4 SV=1	0	FALSE		79.221	57	13	66	13	279	32.4	6.9	51.06	10.91		17.37	9.89		3.35	1.96		4.68		0					14.38	12	6		7	5		2	4		2		1					7
FALSE	High	Master Protein	B2BZC0	Crp OS=Serratia marcescens OX=615 GN=crp PE=4 SV=1	0	FALSE	Bacteria	12.427	16	3	5	3	210	23.5	8.25								6.98																	3
FALSE	High	Master Protein	A0A088ARS8	CS domain-containing protein OS=Apis mellifera OX=7460 PE=4 SV=1	0	FALSE		10.367	14	2	20	2	176	20.1	4.46	1.87			1.63	0	3.88		1.76	0	0	0	3.72				2.65	2.12	1			1	1	1		1	1	1	1	1				1	1
FALSE	High	Master Protein	A0A088AWB1	CS domain-containing protein OS=Apis mellifera OX=7460 PE=4 SV=1	0.005	FALSE		3.621	13	2	2	2	159	18.4	7.33	0										0							1										1
FALSE	High	Master Protein	A0A088ARR5	CSD_1 domain-containing protein OS=Apis mellifera OX=7460 GN=yps PE=4 SV=1	0	FALSE		22.397	20	4	11	4	279	30.2	9.95					2.94	1.78								9.52	6.18	2.31						2	1								2	2	2
FALSE	High	Master Protein	A0A088AKE3	C-type lectin domain-containing protein OS=Apis mellifera OX=7460 GN=100578121 PE=4 SV=1	0	FALSE		25.88	15	5	16	5	315	37.2	9.91			6.43		1.91	0				0		2.35	0		2.35					2		1	2				1		2	1		2
FALSE	High	Master Protein	A0A088ACU2	C-type lectin domain-containing protein OS=Apis mellifera OX=7460 GN=CTL1 PE=4 SV=1	0	FALSE		30.353	19	6	23	6	429	47.6	4.61	8.07			10.66				0							0			3			6				3							1
FALSE	High	Master Protein	A0A087ZXS4	C-type lectin domain-containing protein OS=Apis mellifera OX=7460 GN=CTL11 PE=4 SV=1	0	FALSE		29.726	32	5	16	4	219	25.3	7.36	0		16.28		10.2	1.69				0					3.37			1		4		3	1				3					1
FALSE	High	Master Protein	A0A087ZNY6	C-type lectin domain-containing protein OS=Apis mellifera OX=7460 GN=CTL5 PE=4 SV=1	0	FALSE		109.717	59	10	171	9	217	25	8.32	5.65	17.38	125.17	19.22	108.88	46.15	12.29		0	43.21			7.39		18.07			2	6	10	5	8	9	4		2	7			4		5
FALSE	High	Master Protein	A0A088AM42	C-type lectin domain-containing protein OS=Apis mellifera OX=7460 PE=4 SV=1	0	FALSE		62.169	44	7	71	7	231	26.8	7.36	5.48		77.1	0	11.82	22.58	8.92			4.12			6.63		9.88			3		7	2	4	6	4			3			3		3
FALSE	High	Master Protein	A0A1Q1FTQ0	Cupin OS=Enterococcus faecalis OX=1351 GN=BZG32_06965 PE=4 SV=1	0.009	FALSE	Bacteria	2.681	5	1	3	1	143	16.6	6.52	1.64			0													0	1			1													1
FALSE	High	Master Protein	A0A088A6G8	CYCLIN domain-containing protein OS=Apis mellifera OX=7460 GN=LOC412342 PE=3 SV=1	0	FALSE		6.512	10	2	2	2	271	31.2	5.99									2.12																	2
FALSE	High	Master Protein	A0A093SE41	Cysteine synthase OS=Pectobacterium carotovorum subsp. carotovorum OX=555 GN=KP17_11610 PE=3 SV=1	0	FALSE	Bacteria	12.308	15	3	8	3	322	34.6	6.4								6.47			2.22														3			2
FALSE	High	Master Protein	A0A347ZMU3	Cytochrome b OS=Apis mellifera OX=7460 GN=Cytb PE=3 SV=1	0	FALSE		19.15	11	4	31	1	383	45.2	9.29	5.33		4.43		10.76	7.5	1.7		7.27			6.31	3.74		2.33			2		4		4	2	1		1			2	1		1
FALSE	High	Master Protein	A0A0B5HAV3	Cytochrome b OS=Apis mellifera syriaca OX=279977 GN=CYTB PE=3 SV=1	0	FALSE		18.149	11	4	30	1	383	45.2	9.29	5.33		4.43		7.44	7.5	1.7		7.27			6.31	3.74		2.33			2		3		3	2	1		2			2	1		1
FALSE	High	Master Protein	A0A088AV27	Cytochrome b5 heme-binding domain-containing protein OS=Apis mellifera OX=7460 GN=LOC413164 PE=3 SV=1	0	FALSE		82.913	56	11	82	11	198	22.1	5.08	15.78		14.17	9.88	22.38	13.08			27.31	12.03		7.99	6.96	24.72	52.14	8.43	2.32	3		3	1	4	3			7	2		3	3	6	9	4	1
FALSE	High	Master Protein	A0A088A5G3	Cytochrome b5 heme-binding domain-containing protein OS=Apis mellifera OX=7460 GN=LOC413486 PE=3 SV=1	0	FALSE		22.482	38	2	13	2	138	15.8	4.7			6.23	5.24	2.51	2.65			6.85			0		0	9.04					1	1	1	1			1			1		1	1
FALSE	High	Master Protein	A0A087ZUT7	Cytochrome b5 heme-binding domain-containing protein OS=Apis mellifera OX=7460 GN=LOC726850 PE=3 SV=1	0	FALSE		4.991	13	1	1	1	135	15.3	4.7	1.88																	1
FALSE	High	Master Protein	A0A087ZUT8	Cytochrome b5 heme-binding domain-containing protein OS=Apis mellifera OX=7460 GN=LOC726860 PE=3 SV=1	0	FALSE		32.695	49	3	87	3	130	14.5	5.29	10.08	0	18.42	8.13	13.26	19.7	0		26.35	2.37		15.37	10.63	18.45	31.21	6.49	2.47	3	1	3	3	3	3	1		3	3		3	2	3	3	3	3
FALSE	High	Master Protein	A0A088AJP5	Cytochrome b5 heme-binding domain-containing protein OS=Apis mellifera OX=7460 PE=4 SV=1	0	FALSE		4.567	3	1	1	1	427	50.1	7.74	2.04																	1
FALSE	High	Master Protein	A0A088AFT4	Cytochrome b-c1 complex subunit 6 OS=Apis mellifera OX=7460 GN=LOC726316 PE=3 SV=1	0	FALSE		23.353	44	3	32	3	87	10.2	6.99						0			16.58			0		0	14.34								2			3			1		2	3
FALSE	High	Master Protein	A0A088ASD9	Cytochrome b-c1 complex subunit 7 OS=Apis mellifera OX=7460 GN=LOC551757 PE=3 SV=1	0	FALSE		108.296	70	11	193	11	110	13.5	5.92	34.24		37.73	30.57	52.15	54	13.82		66.12	14.01		48.14	29.4	26.97	56.53	2.55		5		6	7	7	9	6		9	5		7	5	5	8	1
FALSE	High	Master Protein	A0A088AI48	Cytochrome b-c1 complex subunit Rieske, mitochondrial OS=Apis mellifera OX=7460 PE=4 SV=1	0	FALSE		74.069	59	13	185	13	246	26.7	9.13	27.55		51.54	30.6	66.08	52.12	21.31		59.03	4.81		42.5	32.15	11.21	25.99	3.68		6		8	8	9	9	6		10	2		8	8	2	6	2
FALSE	High	Master Protein	A0A087ZSK5	Cytochrome c heme lyase OS=Apis mellifera OX=7460 GN=LOC408968 PE=3 SV=1	0.006	FALSE		3.477	8	1	2	1	276	32.2	6.25			0						0											1						1
FALSE	High	Master Protein	P00038	Cytochrome c OS=Apis mellifera OX=7460 GN=cytC PE=1 SV=2	0	FALSE		29.054	52	6	53	6	108	11.9	9.47	11.57		4.15	1.83	4.17	12.22	0	11.53	4.11	1.64	3.67	2.11		6.34	1.75	3.38	1.84	3		1	1	1	5	1	6	1	1	2	3		2	1	4	2
FALSE	High	Master Protein	A0A0B5HAU2	Cytochrome c oxidase subunit 1 OS=Apis mellifera syriaca OX=279977 GN=COX1 PE=3 SV=1	0	FALSE		9.413	7	2	22	2	520	59.1	8.15			11.74	0	0				3.41			0	1.6		4.05	4.15				1	1	1				1			1	1		1	1
FALSE	High	Master Protein	P20375	Cytochrome c oxidase subunit 2 OS=Apis mellifera ligustica OX=7469 GN=COII PE=3 SV=1	0	FALSE		42.883	24	4	107	4	225	26.6	6.37	19.91		31.43	16.01	42.42	23.09	11.46	0	39.05	6.12		19.37	35.48	9.08	26.49	11.65	0	3		3	2	4	4	2	1	4	3		4	2	1	2	2	1
FALSE	High	Master Protein	A0A087ZUZ0	Cytochrome c oxidase subunit OS=Apis mellifera OX=7460 GN=Cox6b1 PE=3 SV=1	0	FALSE		33.227	83	5	63	5	92	10.9	7.78	6.98		16.85	0	27.84	7.92	5.36	2.11	4.87	0	0	19.63	3.28	11.36		2.48	0	3		3	1	5	3	4	3	2	2	2	3	1	4		2	1
FALSE	High	Master Protein	A0A1Q5W5F2	Cytochrome d terminal oxidase subunit 1 OS=Serratia marcescens OX=615 GN=A8A12_16780 PE=4 SV=1	0.008	FALSE	Bacteria	2.882	3	1	1	1	522	57.9	7.12								0																	1
FALSE	High	Master Protein	Q9NIM0	Cytochrome P450 (Fragment) OS=Trichogramma cacaeciae OX=1667566 GN=CYP4G12 PE=4 SV=1	0	FALSE		7.877	28	2	2	1	127	14.5	5.47	1.75				2.26													1				1
FALSE	High	Master Protein	Q309A5	Cytochrome P450 monooxygenase OS=Apis mellifera OX=7460 GN=CYP6AS5 PE=2 SV=1	0	FALSE		155.039	49	26	207	2	499	57.9	8.38	6.39		106.01	4.77	40.8	81.64			84.12	5.36	2.27	15.68	12.74	32.25	83.1	15.09	0	2		20	4	12	17			18	5	3	7	6	10	17	12	1
FALSE	High	Master Protein	A0A088AEK4	Cytochrome P450 monooxygenase OS=Apis mellifera OX=7460 PE=4 SV=1	0	FALSE		147.689	49	24	189	1	491	57.1	8.56	6.39		97.51	4.77	42.55	75.34			72.07	5.36	2.27	13.26	7.25	26.7	75.83	15.09	0	2		18	3	11	16			16	4	2	6	4	8	15	11	1
FALSE	High	Master Protein	A0A088ADG9	CYTOSOL_AP domain-containing protein OS=Apis mellifera OX=7460 PE=4 SV=1	0	FALSE		109.659	45	15	63	15	457	49.3	6.98	7.5			5.08		2.93		0	38.57		8.92	2.28	16.27	13.79	34.46	10.09		4			3		1		1	10		6	1	5	4	8	5
FALSE	High	Master Protein	A0A088AR65	Cytosolic Fe-S cluster assembly factor NUBP2 homolog OS=Apis mellifera OX=7460 GN=LOC410516 PE=3 SV=1	0	FALSE		26.301	36	6	10	6	260	28	6.13	2.84					3.55					2.5	6.66				0		1					1					3	4				1
FALSE	High	Master Protein	B9UKF1	Defensin OS=Apis cerana cerana OX=94128 GN=Def PE=2 SV=1	0	FALSE		11.816	27	2	28	2	95	10.7	7.24	6.44	1.76			5.07	4.77		7.33		8.51			0			4.8	8.53	2	1			2	1		2		2			1			1	2
FALSE	High	Master Protein	A0A088A822	Delta-1-pyrroline-5-carboxylate synthase OS=Apis mellifera OX=7460 GN=LOC412948 PE=3 SV=1	0	FALSE		21.634	11	5	6	5	784	85	7.81	5.81																	5
FALSE	High	Master Protein	A0A088AQM2	Deltameth_res domain-containing protein OS=Apis mellifera OX=7460 GN=LOC551381 PE=4 SV=1	0	FALSE		41.023	62	3	94	3	94	10.5	9.76	13.19		34.06	15.58	39.34	21.96	12.17		23.81	7.09		19.24	2.41	5.5	27.69	0		2		2	2	2	2	2		2	2		2	2	1	2	1
FALSE	High	Master Protein	A0A0U8TLS0	Deoxyribose-phosphate aldolase OS=Serratia marcescens OX=615 GN=deoC PE=3 SV=1	0	FALSE	Bacteria	4.091	7	1	1	1	259	27.6	6.14								0																	1
FALSE	High	Master Protein	A0A087ZR38	DEP domain-containing protein OS=Apis mellifera OX=7460 GN=Trp1 PE=4 SV=1	0	FALSE		17.878	12	4	4	4	364	42.6	8.56															9.86																	4
FALSE	High	Master Protein	A0A088A2G9	Dephospho-CoA kinase OS=Apis mellifera OX=7460 PE=3 SV=1	0	FALSE		7.394	14	2	3	2	236	27.2	9.26					0				0						2.01							1				1						1
FALSE	High	Master Protein	A0A088A6M4	Derlin OS=Apis mellifera OX=7460 GN=727262 PE=3 SV=1	0	FALSE		13.831	14	3	3	3	250	29.2	8.18			1.81		2.84										3.24					1		1										1
FALSE	High	Master Protein	A0A088AI75	Diacylglycerol kinase OS=Apis mellifera OX=7460 GN=rdgA PE=3 SV=1	0	FALSE		10.649	1	1	1	1	1358	149.8	7.05															2.93																	1
FALSE	High	Master Protein	A0A088APL2	Dihydrolipoamide acetyltransferase component of pyruvate dehydrogenase complex OS=Apis mellifera OX=7460 GN=LOC551631 PE=3 SV=1	0	FALSE		105.316	42	16	93	16	622	66.9	6.74	8.08		7	9.09	50.7	16.33			37.61	0		9.31	2.98	20.94	41.35	0		3		3	8	10	7			10	1		6	3	6	9	3
FALSE	High	Master Protein	A0A088AII9	Dihydrolipoyl dehydrogenase OS=Apis mellifera OX=7460 GN=LOC551039 PE=3 SV=1	0	FALSE		82.592	33	10	41	10	507	54.5	7.64	4.05		13.27	0	18.19	6.53			8.65			1.65	2.99	18.1	12.6	0		2		4	1	6	2			4			1	1	6	4	1
FALSE	High	Master Protein	A0A2G4PMH8	Dihydrolipoyl dehydrogenase OS=Serratia marcescens OX=615 GN=lpdA PE=3 SV=1	0	FALSE	Bacteria	37.573	26	8	16	8	475	50.7	5.94								17.53			2.1														8			1
FALSE	High	Master Protein	A0A2H4MD19	Dihydropteridine reductase (Fragment) OS=Apis mellifera OX=7460 GN=DHPR PE=2 SV=1	0	FALSE		29.724	46	7	33	1	230	24.9	8.76	12.18		2.72	7.89	3.67	4.79		5.97		0	0	0	1.64			7.75	1.69	7		1	3	1	1		3		2	1	1	1			3	3
FALSE	High	Master Protein	A0A087ZQA2	Dipeptidase OS=Apis mellifera OX=7460 PE=3 SV=1	0	FALSE		43.613	27	9	27	9	418	47	7.24	16.6			0	2.11	3.05	0	17.46		0		0				0	0	4			1	1	1	1	8		1		1				1	2
FALSE	High	Master Protein	A0A088ARC7	DJ-1_PfpI domain-containing protein OS=Apis mellifera OX=7460 PE=4 SV=1	0	FALSE		29.729	53	8	31	8	186	20.2	6.57	8.56			2.91		4.24		4.93			1.92	8.68		4.92		11.37	1.91	3			2		2		4			2	5		2		5	2
FALSE	High	Master Protein	A0A1Q4P430	DNA protection during starvation protein OS=Serratia marcescens OX=615 GN=dps PE=3 SV=1	0	FALSE	Bacteria	12.22	13	2	7	2	167	18.8	5.78								9.2			6.45														1			2
FALSE	High	Master Protein	A0A093TNL4	DNA-binding protein OS=Pectobacterium carotovorum subsp. carotovorum OX=555 GN=KP17_19060 PE=3 SV=1	0	FALSE	Bacteria	26.074	58	4	15	4	90	9.5	9.58								34.24			2.05														4			2
FALSE	High	Master Protein	A0A080UVZ0	DNA-binding protein OS=Serratia marcescens OX=615 GN=hns PE=3 SV=1	0	FALSE	Bacteria	6.467	16	2	3	2	135	15.4	5.47								7.24																	2
FALSE	High	Master Protein	A0A221HGA1	DNA-binding response regulator OS=Serratia marcescens OX=615 GN=BVG84_21095 PE=4 SV=1	0.007	FALSE	Bacteria	3.132	8	1	1	1	232	26.3	5.67								0																	1
FALSE	High	Master Protein	A0A221HH74	DNA-binding response regulator OS=Serratia marcescens OX=615 GN=BVG84_24795 PE=4 SV=1	0	FALSE	Bacteria	8.756	11	2	2	2	238	27.2	5.68								0																	2
FALSE	High	Master Protein	A0A080UX61	DNA-binding response regulator OS=Serratia marcescens OX=615 GN=ompR_2 PE=4 SV=1	0.008	FALSE	Bacteria	2.879	4	1	1	1	239	27.3	6.58								1.64																	1
FALSE	High	Master Protein	A0A084WVH6	DNA-directed RNA polymerase subunit alpha OS=Serratia marcescens OX=615 GN=rpoA PE=3 SV=1	0	FALSE	Bacteria	28.566	40	9	11	9	329	36.4	5.06								6.16																	9
FALSE	High	Master Protein	A0A1Q4NUD5	DNA-directed RNA polymerase subunit beta' OS=Serratia marcescens OX=615 GN=rpoC PE=3 SV=1	0	FALSE	Bacteria	19.399	6	6	7	6	1407	154.8	6.52								5.45																	6
FALSE	High	Master Protein	A0A080V3I7	DNA-directed RNA polymerase subunit omega OS=Serratia marcescens OX=615 GN=rpoZ PE=3 SV=1	0.006	FALSE	Bacteria	3.211	25	1	1	1	91	10.2	4.92								2.03																	1
FALSE	High	Master Protein	A0A087ZYS0	Dolichol-phosphate mannosyltransferase subunit 1 OS=Apis mellifera OX=7460 GN=LOC409115 PE=3 SV=1	0	FALSE		10.494	13	2	2	2	253	29	8.4									2.9						3											1						1
FALSE	High	Master Protein	A0A087ZSQ6	Dolichyl-diphosphooligosaccharide--protein glycosyltransferase 48 kDa subunit OS=Apis mellifera OX=7460 GN=LOC552051 PE=3 SV=1	0	FALSE		60.769	32	8	53	8	434	48.4	5.55	12.32		15.58	2.24	20.84	8.56			20.47	0		6.22	2.28	8.67	18.51	1.83		6		3	1	4	3			6	2		4	1	3	2	1
FALSE	High	Master Protein	A0A087ZUX6	Dolichyl-diphosphooligosaccharide--protein glycosyltransferase subunit 1 OS=Apis mellifera OX=7460 PE=3 SV=1	0	FALSE		95.288	42	18	88	18	566	65.5	7.34	14.04		34.31	0	20.49	13.42			26.81	1.68		5.85	7.18	9.09	32.33	0		6		10	3	9	5			9	6		6	4	4	9	1
FALSE	High	Master Protein	A0A088A702	Dolichyl-diphosphooligosaccharide--protein glycosyltransferase subunit 2 OS=Apis mellifera OX=7460 PE=3 SV=1	0	FALSE		32.783	11	5	9	5	651	73.3	8.92	0				0				6.16	0					11.89			1				1				1	1					4
FALSE	High	Master Protein	Q86DH6	Dorsal protein splice variant B OS=Apis mellifera OX=7460 GN=Dl PE=2 SV=1	0	FALSE		6.075	3	2	2	2	810	92.2	6.14									4.09																	2
FALSE	High	Master Protein	A0A093SBL7	D-ribose transporter subunit RbsB OS=Pectobacterium carotovorum subsp. carotovorum OX=555 GN=KP17_19325 PE=4 SV=1	0	FALSE	Bacteria	4.394	4	1	1	1	295	30.7	8.66								2.02																	1
FALSE	High	Master Protein	A0A088A6Q4	DUF1279 domain-containing protein OS=Apis mellifera OX=7460 GN=LOC725167 PE=4 SV=1	0	FALSE		9.092	7	2	10	2	353	39.7	9.58	0		2.53	0	2.16	2.18			4.61									1		1	1	2	1			2
FALSE	High	Master Protein	A0A088A7I9	DUF1681 domain-containing protein OS=Apis mellifera OX=7460 GN=LOC409531 PE=4 SV=1	0	FALSE		5.516	11	2	4	2	243	27.3	8.51	0			0														1			2
FALSE	High	Master Protein	A0A088A055	DUF1907 domain-containing protein OS=Apis mellifera OX=7460 GN=LOC411385 PE=4 SV=1	0	FALSE		13.937	20	4	12	4	319	35.4	6.57	9.76			0				0		0	0	2.14						4			1				2		1	1	1
FALSE	High	Master Protein	A0A088ABN7	DUF862 domain-containing protein OS=Apis mellifera OX=7460 GN=LOC409784 PE=4 SV=1	0	FALSE		9.9	7	3	4	3	558	63.5	5.29						0						0	2.35										1						1	1
FALSE	High	Master Protein	A0A088A6F7	DUF953 domain-containing protein OS=Apis mellifera OX=7460 GN=cl PE=4 SV=1	0	FALSE		8.135	30	2	4	2	126	14.6	5.55								0								3.34									2								2
FALSE	High	Master Protein	A0A093SN46	D-xylose transporter subunit XylF OS=Pectobacterium carotovorum subsp. carotovorum OX=555 GN=xylF PE=4 SV=1	0.008	FALSE	Bacteria	2.737	3	1	1	1	331	35.6	5.85								0																	1
FALSE	High	Master Protein	A0A088A1V1	Dynamin-type G domain-containing protein OS=Apis mellifera OX=7460 GN=410263 PE=3 SV=1	0	FALSE		48.166	17	12	17	12	766	87.7	7.03			0		0	0						1.73	0		21.53					2		3	2						1	1		8
FALSE	High	Master Protein	A0A088AMM2	Dynamin-type G domain-containing protein OS=Apis mellifera OX=7460 GN=opa1-like PE=3 SV=1	0	FALSE		20.595	6	5	8	5	976	113.6	8.47	0				0				4.22			1.81	3.18		6.47			1				1				1			1	2		2
FALSE	High	Master Protein	A0A087ZRS3	Dynamin-type G domain-containing protein OS=Apis mellifera OX=7460 PE=3 SV=1	0	FALSE		255.333	49	32	338	32	868	97.9	4.44	57.01		71.27		63.75	70.47	7.75	0	139.65	1.95	31.87	54.68	80.41	80.79	99.11	11.57		11		15		16	15	9	1	24	2	12	15	18	16	13	8
FALSE	High	Master Protein	A0A087ZYC6	Dynein light chain OS=Apis mellifera OX=7460 GN=DLC-D PE=3 SV=1	0	FALSE		17.353	51	4	42	4	89	10.4	7.37	7.4		3.27	5.52	7.71	13.03		3.23	6.93	2.72	2.5	7.67		12.51	3.48	0		3		2	2	2	3		2	2	2	1	2		3	1	1
FALSE	High	Master Protein	A0A088ADJ6	Dynein light chain roadblock OS=Apis mellifera OX=7460 GN=robl PE=3 SV=1	0	FALSE		4.945	12	1	1	1	97	10.8	6.55														0																	1
FALSE	High	Master Protein	A0A088A8B6	Dynein light intermediate chain OS=Apis mellifera OX=7460 GN=Dlic PE=3 SV=1	0	FALSE		12.722	9	3	3	3	480	53.4	5.81									3.79				1.76													2				1
FALSE	High	Master Protein	A0A088AKW6	DZF domain-containing protein OS=Apis mellifera OX=7460 GN=Zn72D PE=4 SV=1	0	FALSE		12.791	4	3	5	3	997	108.1	9.04	2				2.62									2.01	0			1				1									2	1
FALSE	High	Master Protein	A0A088ADR7	E2_bind domain-containing protein OS=Apis mellifera OX=7460 GN=LOC409394 PE=4 SV=1	0.008	FALSE		2.961	2	1	1	1	439	49.4	6.3														0																	1
FALSE	High	Master Protein	A0A088A142	ECSIT_Cterm domain-containing protein OS=Apis mellifera OX=7460 PE=4 SV=1	0.01	FALSE		2.493	3	1	1	1	289	34.1	8.47									1.69																	1
FALSE	High	Master Protein	A0A088AUN3	EF-hand domain-containing protein OS=Apis mellifera OX=7460 GN=LOC552747 PE=4 SV=1	0	FALSE		12.448	6	2	3	2	526	59.8	4.5														0		3.85															1		2
FALSE	High	Master Protein	A0A088AAX0	EF-hand domain-containing protein OS=Apis mellifera OX=7460 GN=Manf PE=4 SV=1	0.008	FALSE		2.759	6	1	2	1	175	20.1	7.52												2.26				0													1				1
FALSE	High	Master Protein	A0A088AA85	eIF2B_5 domain-containing protein OS=Apis mellifera OX=7460 PE=4 SV=1	0	FALSE		20.034	25	7	8	7	335	38.3	7.64			0		0				2.08			2.03	0		7.03					1		1				1			1	1		3
FALSE	High	Master Protein	A0A0B4J2M5	Electron transfer flavoprotein-ubiquinone oxidoreductase OS=Apis mellifera OX=7460 GN=Etfdh PE=4 SV=1	0	FALSE		15.02	11	4	7	4	606	67	7.53			5.75						0					0	1.91					1						1					2	1
FALSE	High	Master Protein	A0A087ZS68	ELFV_dehydrog domain-containing protein OS=Apis mellifera OX=7460 GN=Gdh PE=3 SV=1	0	FALSE		181.76	61	29	279	29	553	61.6	8.09	36.83		49.29	14.48	49.15	65.98		0	99.32	0	13.74	41.08	40.05	100.38	47.97	16.47	0	13		14	9	16	17		6	21	4	12	15	13	20	14	12	2
FALSE	High	Master Protein	A0A087ZRE3	Elongation factor 1-alpha OS=Apis mellifera OX=7460 GN=EF1a-F2 PE=3 SV=1	0	FALSE		220.995	55	21	671	10	461	50.3	9.03	177.64	17.81	134.27	84.91	134.53	128.68	37.16	50.74	121.26	39.97	109.4	117.63	239.61	94.06	195.28	113.08	18.46	17	6	15	13	12	14	11	13	15	12	14	13	13	9	15	14	9
FALSE	High	Master Protein	P19039	Elongation factor 1-alpha OS=Apis mellifera OX=7460 PE=3 SV=1	0	FALSE		156.267	52	18	479	7	461	50.5	9.09	135.19	1.87	89.95	44.54	75.5	104.56	21.64	34.02	98.75	18.64	86.21	97.52	65.53	60.69	82.96	53.31	16.08	15	2	13	11	11	14	8	12	13	9	13	14	11	7	12	9	7
FALSE	High	Master Protein	A0A093SUC9	Elongation factor G OS=Pectobacterium carotovorum subsp. carotovorum OX=555 GN=fusA PE=3 SV=1	0	FALSE	Bacteria	73.875	34	15	22	2	704	77.4	5.3								29.45			0														15			1
FALSE	High	Master Protein	A0A0G3SNS0	Elongation factor G OS=Serratia marcescens OX=615 GN=fusA_1 PE=3 SV=1	0	FALSE	Bacteria	85.219	36	17	25	4	704	77.6	5.27								40.57			0														17			1
FALSE	High	Master Protein	A0A080UYV2	Elongation factor P OS=Serratia marcescens OX=615 GN=efp PE=3 SV=1	0	FALSE	Bacteria	5.428	6	1	1	1	188	20.7	5.27								1.97																	1
FALSE	High	Master Protein	A0A093RQS3	Elongation factor Ts OS=Pectobacterium carotovorum subsp. carotovorum OX=555 GN=tsf PE=3 SV=1	0	FALSE	Bacteria	6.236	8	2	2	2	283	30.5	5.29								0																	2
FALSE	High	Master Protein	A0A088A1L8	Elongation factor Ts, mitochondrial OS=Apis mellifera OX=7460 GN=LOC408352 PE=3 SV=1	0	FALSE		16.981	21	5	10	5	302	34	6.71	5.6		1.89		1.83	1.95					5.04	1.65						2		1		2	1					2	1
FALSE	High	Master Protein	D1MWN8	Elongation factor Tu (Fragment) OS=Pectobacterium carotovorum subsp. carotovorum OX=555 GN=tuf PE=4 SV=1	0	FALSE	Bacteria	48.842	42	8	32	1	257	28.7	4.89						2.28	0	47.13			7.22					3.83							1	1	8			4					3
FALSE	High	Master Protein	A0A087ZW54	Elongation factor Tu OS=Apis mellifera OX=7460 GN=LOC408328 PE=3 SV=1	0	FALSE		283.828	73	27	534	25	469	52.4	7.96	120.88		106.95	23.85	104.89	124.49	9.37	2.33	117.61	4.12	100.47	119.47	85.21	45.5	130.26	23.98	1.66	18		19	15	15	18	8	5	19	4	22	23	15	11	19	10	1
FALSE	High	Master Protein	A0A1B4XKS5	Elongation factor Tu OS=Enterococcus faecalis OX=1351 GN=tuf PE=3 SV=1	0	FALSE	Bacteria	28.429	13	4	17	3	395	43.4	4.83			16.5	1.86				15.23							6.89					3	1				2							1
FALSE	High	Master Protein	V5T6M5	Elongation factor Tu OS=Lactobacillus mellis OX=1218508 GN=tuf PE=3 SV=1	0	FALSE		24.396	18	5	33	2	417	46.2	4.97	9.27		6.89	1.88	3.97	10.59	1.72	4.5	4.17	0	3.99	5.96	2.37				1.66	2		2	1	1	2	1	3	1	1	1	1	1				2
FALSE	High	Master Protein	A0A0J5CD52	Elongation factor Tu OS=Serratia marcescens OX=615 GN=tuf PE=3 SV=1	0	FALSE	Bacteria	96.05	47	13	62	4	394	43.2	5.31	2.88		2.38			2.28	0	90.89			10.32				6.89	3.83		1		1			1	1	13			6				1	4
FALSE	High	Master Protein	V5RJB0	Elongation factor Tu OS=Spiroplasma apis B31 OX=1276258 GN=tufA PE=3 SV=1	0	FALSE		30.09	9	3	40	1	395	43	5.31	5.82		20.38	1.88	3.97	8.27	1.72	15.23	4.17	0	3.99	5.96	2.37		6.89		1.66	1		3	1	1	1	1	2	1	1	1	1	1		1		1
FALSE	High	Master Protein	A0A088AIA2	Elongation of very long chain fatty acids protein OS=Apis mellifera OX=7460 GN=LOC413789 PE=3 SV=1	0	FALSE		13.41	4	1	9	1	331	38.9	9.11					6.09				6.42					3.55	7.14	2.33						1				1					1	1	1
FALSE	High	Master Protein	A0A088AIA4	Elongation of very long chain fatty acids protein OS=Apis mellifera OX=7460 PE=3 SV=1	0	FALSE		13.468	23	4	10	4	139	16.4	7.4					0				2.08						7.31	0	0					2				2						3	1	1
FALSE	High	Master Protein	A0A088AIA5	Elongation of very long chain fatty acids protein OS=Apis mellifera OX=7460 PE=3 SV=1	0	FALSE		8.051	13	3	5	3	214	25.3	9.45					2.13				3.99						2.81							1				3						1
FALSE	High	Master Protein	A0A088AG65	EMC1_C domain-containing protein OS=Apis mellifera OX=7460 PE=4 SV=1	0	FALSE		26.357	7	5	11	5	947	106.2	8.44	0		6.21		3.6	2.08			4.18						3.91			1		2		3	1			3						1
FALSE	High	Master Protein	A0A088AST9	Enolase OS=Apis mellifera OX=7460 PE=4 SV=1	0	FALSE		191.663	61	16	441	16	366	39.8	7.05	148.73	0	2.25	45.89	39.86	50.15	22.39	98.67	68.64	9.18	105.56	59.39	125.44	86.6	76.99	98	23.03	13	1	2	9	9	10	8	14	11	5	14	11	11	12	13	14	7
FALSE	High	Master Protein	A0A093SNW0	Enolase OS=Pectobacterium carotovorum subsp. carotovorum OX=555 GN=eno PE=3 SV=1	0	FALSE	Bacteria	53.266	24	7	26	1	431	45.2	5.3	1.63							41.49			3.46							1							7			3
FALSE	High	Master Protein	A0A0G3SMF5	Enolase OS=Serratia marcescens OX=615 GN=eno_1 PE=3 SV=1	0	FALSE	Bacteria	53.855	28	7	25	1	431	45.4	5.38	1.63							40.92			3.46							1							7			3
FALSE	High	Master Protein	A0A093STM5	Enoyl-[acyl-carrier-protein] reductase [NADH] OS=Pectobacterium carotovorum subsp. carotovorum OX=555 GN=KP17_02455 PE=3 SV=1	0	FALSE	Bacteria	6.053	10	2	2	2	262	27.9	5.44								1.68																	2
FALSE	High	Master Protein	A0A088AQL3	ENTH domain-containing protein OS=Apis mellifera OX=7460 GN=lqfR PE=4 SV=1	0	FALSE		4.646	1	1	3	1	1443	165.4	5.53						2.01						4.09											1						1
FALSE	High	Master Protein	A0A088ATX9	ENTH domain-containing protein OS=Apis mellifera OX=7460 PE=4 SV=1	0.008	FALSE		3.108	2	1	3	1	569	62.4	5.52			1.63			0						0								1			1						1
FALSE	High	Master Protein	A0A088AKI9	Epimerase domain-containing protein OS=Apis mellifera OX=7460 GN=Gmer PE=3 SV=1	0	FALSE		14.162	15	4	5	4	322	36.8	7.05	1.97							1.65					3.1		3.44	0		1							1					1		1	1
FALSE	High	Master Protein	A0A087ZQU6	Epimerase domain-containing protein OS=Apis mellifera OX=7460 PE=4 SV=1	0	FALSE		85.377	38	15	99	15	398	45.9	8.85	15.5		21.05	6.87	31.11	30.2	4.55		40.09	0		16.67	15.41	5.44	14.86	2.44		5		5	4	7	7	4		8	1		5	6	3	5	1
FALSE	High	Master Protein	A0A087ZVE8	Epoxide hydrolase OS=Apis mellifera OX=7460 GN=LOC406152 PE=3 SV=1	0	FALSE		120.096	37	14	271	14	456	52	8.35	26.67		98.45	0	33.56	43.17		0	71.91		10.76	59.52	65.96	57.7	85.85	38.01	6.31	6		12	1	8	8		2	10		5	9	7	9	10	7	4
FALSE	High	Master Protein	A0A088A8C3	ER membrane protein complex subunit 4 OS=Apis mellifera OX=7460 GN=LOC412349 PE=3 SV=1	0	FALSE		14.427	19	2	4	2	175	19.5	9.44					3.97	4.27			7.66													1	1			2
FALSE	High	Master Protein	A0A088A7F1	ETF domain-containing protein OS=Apis mellifera OX=7460 GN=LOC410308 PE=4 SV=1	0	FALSE		70.344	61	12	92	12	253	27.6	6.93	36.12		13.97			7.39		2.2	6.08	2.07	24.7	15.09	12.44	23.38	25.9	21.37	6.17	8		4			3		1	4	1	9	5	7	6	6	5	3
FALSE	High	Master Protein	A0A088A872	ETF domain-containing protein OS=Apis mellifera OX=7460 GN=LOC551710 PE=4 SV=1	0	FALSE		99.204	64	17	110	17	333	35.4	8.32	32.98		31.23	0	8.26	14.3		3.65	28.15	0	29.07	22.24	19.17	11.06	17.21	11.76	0	8		8	1	4	6		2	8	1	12	7	6	4	6	6	2
FALSE	High	Master Protein	A0A088AFA9	ETS domain-containing protein OS=Apis mellifera OX=7460 PE=3 SV=1	0	FALSE		24.879	8	7	10	7	1075	121.7	6.67	2.54		1.83						0	0		0	1.85	0	2.08			2		1						1	1		1	2	1	1
FALSE	High	Master Protein	A0A088A560	Eukaryotic translation initiation factor 3 subunit A OS=Apis mellifera OX=7460 GN=eIF3-S10 PE=3 SV=1	0	FALSE		33.051	11	7	9	7	1098	129.8	8.84						1.75			6.23				1.97		5.8								1			3				3		2
FALSE	High	Master Protein	A0A088AC80	Eukaryotic translation initiation factor 3 subunit B OS=Apis mellifera OX=7460 GN=eIF3-S9 PE=3 SV=1	0	FALSE		36.475	16	8	19	8	702	81.5	5.55			0		6.35	0			17.54			2.27	0	3.05	1.96					1		2	1			7			2	1	1	1
FALSE	High	Master Protein	A0A087ZST3	Eukaryotic translation initiation factor 3 subunit C OS=Apis mellifera OX=7460 GN=eIF3-S8 PE=3 SV=1	0	FALSE		21.915	6	4	10	4	892	104.3	5.83			0						3.75			0	0	0	2.39					1						3			1	2	1	1
FALSE	High	Master Protein	A0A088AEQ4	Eukaryotic translation initiation factor 3 subunit D OS=Apis mellifera OX=7460 GN=eIF-3p66 PE=3 SV=1	0	FALSE		30.268	16	6	8	6	562	64.6	5.86									3.34				2.04	6.04	4.86	0										1				1	2	2	2
FALSE	High	Master Protein	A0A088AQJ3	Eukaryotic translation initiation factor 3 subunit E OS=Apis mellifera OX=7460 GN=LOC551242 PE=3 SV=1	0	FALSE		15.883	12	3	3	3	440	51.6	6.07									2.17						6.56											1						2
FALSE	High	Master Protein	A0A088A223	Eukaryotic translation initiation factor 3 subunit F OS=Apis mellifera OX=7460 GN=LOC413145 PE=3 SV=1	0	FALSE		26.552	23	5	17	5	285	31.4	5.74			2.35		1.73	1.6			9.88				5.33	2.32	7.56	0				1		2	1			4				2	2	3	1
FALSE	High	Master Protein	A0A088AKE0	Eukaryotic translation initiation factor 3 subunit G OS=Apis mellifera OX=7460 GN=LOC408386 PE=3 SV=1	0.004	FALSE		3.712	9	1	2	1	285	31.8	8.06	0					2.41												1					1
FALSE	High	Master Protein	A0A088A4N3	Eukaryotic translation initiation factor 3 subunit H OS=Apis mellifera OX=7460 PE=3 SV=1	0	FALSE		9.104	5	1	3	1	313	36.2	5.87														2.64	3.23	0															1	1	1
FALSE	High	Master Protein	A0A088A549	Eukaryotic translation initiation factor 3 subunit I OS=Apis mellifera OX=7460 GN=Trip1 PE=3 SV=1	0	FALSE		6.613	7	2	4	2	326	36.6	6.8						0			2.2				0		1.84								1			1				1		1
FALSE	High	Master Protein	A0A088A861	Eukaryotic translation initiation factor 3 subunit J OS=Apis mellifera OX=7460 GN=Adam PE=3 SV=1	0.008	FALSE		3.029	4	1	5	1	236	27.4	4.96	0				0	0						1.76						1				1	1						1
FALSE	High	Master Protein	A0A088ATI4	Eukaryotic translation initiation factor 3 subunit K OS=Apis mellifera OX=7460 GN=LOC551960 PE=3 SV=1	0	FALSE		9.04	11	2	3	2	216	24.8	5.82													0	0	2.34															1	1	1
FALSE	High	Master Protein	A0A088AQX2	Eukaryotic translation initiation factor 3 subunit L OS=Apis mellifera OX=7460 GN=LOC552056 PE=3 SV=1	0	FALSE		11.395	7	3	5	3	538	63.4	6.33						0			2.32			0			3.33								1			2			1			1
FALSE	High	Master Protein	A0A088A9L4	Eukaryotic translation initiation factor 3 subunit M OS=Apis mellifera OX=7460 GN=Tango7 PE=3 SV=1	0	FALSE		13.027	9	2	5	2	391	44.4	5.59	0								3.7				0		2.35	0		1								1				1		1	1
FALSE	High	Master Protein	A0A088ALS2	Eukaryotic translation initiation factor 5A OS=Apis mellifera OX=7460 GN=LOC552572 PE=3 SV=1	0	FALSE		34.492	44	6	51	6	160	17.6	5.4	25.49		3.65	2.68	5.43	5.98		6.64		5.84	17.92	8.97	3.19	5.73		8.68	0	5		1	1	1	1		1		3	5	3	1	3		4	1
FALSE	High	Master Protein	A0A088A9Y1	FA_desaturase domain-containing protein OS=Apis mellifera OX=7460 GN=LOC412166 PE=3 SV=1	0	FALSE		12.372	12	4	5	4	347	40.2	9.33			2.53										0		2.29					3										1		1
FALSE	High	Master Protein	A0A088ASN0	FAA_hydrolase domain-containing protein OS=Apis mellifera OX=7460 PE=4 SV=1	0	FALSE		29.624	27	5	27	5	249	27.5	5.34	14.93					2.96		1.75			8.53	6.57	5.34	8.13		4.73		4					1		1			4	2	3	2		3
FALSE	High	Master Protein	A0A088AE74	FABP domain-containing protein OS=Apis mellifera OX=7460 GN=Fabp PE=3 SV=1	0	FALSE		57.506	63	11	104	1	133	15.2	8.37	17.62			13.98	10.63	7.94	2.52	10.15	2.7	9.09	15.84	17.64	1.81	14.87		24.97	10.14	6			5	4	2	2	5	1	5	5	7	1	6		7	5
FALSE	High	Master Protein	A0A088A627	F-actin-capping protein subunit alpha OS=Apis mellifera OX=7460 GN=LOC552486 PE=3 SV=1	0	FALSE		43.185	40	7	34	7	288	32.8	5.55	9.08		7.62	0	14.25	7.35	0	0	6.49	2.04		16.91	2.18	10.92	3.95	0		3		2	2	5	2	1	1	1	1		3	2	3	2	2
FALSE	High	Master Protein	A0A088ALS0	F-actin-capping protein subunit beta OS=Apis mellifera OX=7460 GN=LOC409581 PE=3 SV=1	0	FALSE		34.301	34	6	15	6	273	30.8	5.72	3.74		2.17		2.29				6.6			3.3	7.11	0	8.03	0		1		1		1				3			1	2	1	2	1
FALSE	High	Master Protein	A0A087ZYD0	FAD-binding PCMH-type domain-containing protein OS=Apis mellifera OX=7460 PE=4 SV=1	0	FALSE		15.255	5	4	6	4	1257	140.8	7.3									0					2.8		2.17	0									1					1		1	2
FALSE	High	Master Protein	A0A088A0W3	FAS1 domain-containing protein OS=Apis mellifera OX=7460 PE=4 SV=1	0	FALSE		24.83	36	4	11	4	157	17.5	8.76				6.95	0				2.48												4	1				1
FALSE	High	Master Protein	A0A088A0W2	FAS1 domain-containing protein OS=Apis mellifera OX=7460 PE=4 SV=1	0	FALSE		56.297	38	6	23	6	290	32.5	7.34				48.69		2.91									3.66						6		1									1
FALSE	High	Master Protein	Q76LA4	Fatty acid binding protein OS=Apis mellifera OX=7460 GN=FABP PE=2 SV=1	0	FALSE		56.601	64	11	96	1	132	15	6.74	12.81			13.98	8.81	7.94	2.52	10.15	2.7	9.09	13.93	13.75	1.81	17.41		29.66	14.52	5			4	3	2	2	4	1	4	4	6	1	7		7	5
FALSE	High	Master Protein	Q76LA3	Fatty acid binding protein OS=Apis mellifera OX=7460 GN=FABP PE=2 SV=1	0	FALSE		16.337	33	3	11	3	135	15.5	5.58				13.32				0		0							1.82				3				2		2							1
FALSE	High	Master Protein	A0A1C3HLT1	Fatty acid oxidation complex subunit alpha OS=Serratia marcescens OX=615 GN=fadB PE=3 SV=1	0.01	FALSE	Bacteria	2.518	1	1	1	1	729	79.1	6.65								1.76																	1
FALSE	High	Master Protein	A0A088AU73	Fatty acyl-CoA reductase OS=Apis mellifera OX=7460 GN=100576414 PE=3 SV=1	0	FALSE		15.212	11	4	5	4	509	58.9	9.03	3.57																	4
FALSE	High	Master Protein	D9MWM7	Fatty acyl-CoA reductase OS=Apis mellifera OX=7460 GN=FAR1 PE=2 SV=1	0	FALSE		189.19	60	22	240	22	516	59.1	8.29	0		94.85	1.76	32.59	41.27			127.73		1.65	11.05	30.42	26.77	122.06	29.99	0	1		14	3	8	11			18		3	5	9	6	16	8	2
FALSE	High	Master Protein	D9MX52	Fatty acyl-CoA reductase OS=Apis mellifera OX=7460 GN=LOC411983 PE=2 SV=1	0	FALSE		138.246	50	22	124	22	541	62	8.18			44.25		15.78	7.67			80.43			4.3	11.27	26.66	102.38	5.39	0			10		7	5			17			2	4	6	17	6	1
FALSE	High	Master Protein	D9MX49	Fatty acyl-CoA reductase OS=Apis mellifera OX=7460 PE=2 SV=1	0	FALSE		33.515	19	8	12	8	490	56.3	9.06					0				16.33						2.17							1				8						2
FALSE	High	Master Protein	A0A088AD07	Fatty acyl-CoA reductase OS=Apis mellifera OX=7460 PE=3 SV=1	0	FALSE		8.618	5	2	2	2	516	59.8	8.02									6.29																	2
FALSE	High	Master Protein	A0A088AD05	Fatty acyl-CoA reductase OS=Apis mellifera OX=7460 PE=3 SV=1	0	FALSE		63.64	37	12	68	12	382	44	9.52	0		23.37		18.77	9.66			34.47			7.28	2.9	2.3	26.75			1		8		8	4			10			4	1	2	7
FALSE	High	Master Protein	A0A088A816	F-box domain-containing protein OS=Apis mellifera OX=7460 GN=LOC413670 PE=4 SV=1	0	FALSE		11.605	8	3	7	3	517	59.1	6.68									2.7				2.15	5.01	2.63	0										2				1	2	1	1
FALSE	High	Master Protein	A0A088AHC4	Fe-ADH domain-containing protein OS=Apis mellifera OX=7460 PE=4 SV=1	0	FALSE		10.447	16	2	2	2	149	16.6	9.25															2.56	0																1	1
FALSE	High	Master Protein	A0A088AHC5	Fe-ADH domain-containing protein OS=Apis mellifera OX=7460 PE=4 SV=1	0	FALSE		8.175	16	2	5	2	178	19.7	7.61					1.63						0		1.96	0		0						1						1		1	1		1
FALSE	High	Master Protein	A0A088A9A9	FERM domain-containing protein OS=Apis mellifera OX=7460 PE=4 SV=1	0	FALSE		184.57	53	30	258	30	632	74.6	6.28	39.61	0	52.12	5.41	17.35	64.04	0	1.65	15.7	13.69	6.22	23.42	20.24	34.37	10.89	43.37	43.05	15	2	15	8	7	18	1	6	7	11	7	13	9	13	7	19	16
FALSE	High	Master Protein	A0A088AEI6	FERM domain-containing protein OS=Apis mellifera OX=7460 PE=4 SV=1	0	FALSE		526.396	54	72	346	72	2042	217.9	5.81	16.64		30.38		57.73	157.27	35.95		179.04			26.75	84.31	46.7	145.96	5.23		9		12		20	47	23		48			16	30	21	35	7
FALSE	High	Master Protein	A0A087ZZ33	FERM domain-containing protein OS=Apis mellifera OX=7460 PE=4 SV=1	0	FALSE		115.435	33	21	71	21	921	104.9	8.28	7.7		33.74	0	10.36	18.92			30.82	0		3.91	14.25	2.16	30.17	2.96	0	3		10	1	5	8			10	2		2	8	2	8	2	1
FALSE	High	Master Protein	A0A084WVC3	Ferric uptake regulation protein OS=Serratia marcescens OX=615 GN=fur PE=3 SV=1	0	FALSE	Bacteria	4.778	9	1	2	1	148	16.9	6.3								4.09																	1
FALSE	High	Master Protein	A0A087ZXU0	Ferritin OS=Apis mellifera OX=7460 GN=Fer2LCH PE=3 SV=1	0	FALSE		10.86	11	2	6	2	217	25.2	6.54	2.77	0		1.79				4.63								0		1	1		1				2								1
FALSE	High	Master Protein	A0A087ZXW2	Ferritin OS=Apis mellifera OX=7460 PE=3 SV=1	0	FALSE		11.46	34	4	8	4	132	15.1	6.52								3.79				0				1.62									4				1				1
FALSE	High	Master Protein	A0A087ZU01	Ferrochelatase OS=Apis mellifera OX=7460 GN=ferrochelatase PE=3 SV=1	0	FALSE		58.649	40	12	58	12	397	45.5	8.48	2.4		14.71		4.93	5.23			14.33		1.84	22.92	0	2.78	18.49	2.23		2		6		4	4			6		7	8	1	1	5	1
FALSE	High	Master Protein	A0A1L6QLH9	Ferroxidase OS=Serratia marcescens OX=615 GN=BVG97_20390 PE=3 SV=1	0	FALSE	Bacteria	10.646	20	2	3	2	159	18.5	4.94								6.66																	2
FALSE	High	Master Protein	A0A088A280	FHA domain-containing protein OS=Apis mellifera OX=7460 GN=LOC413046 PE=4 SV=1	0.008	FALSE		2.826	2	1	37	1	795	91.4	4.97	0								0				1.65	5.12	16.02	0		1								1				1	1	1	1
FALSE	High	Master Protein	A0A087ZYL7	Fibrillar collagen NC1 domain-containing protein OS=Apis mellifera OX=7460 GN=LOC410038 PE=4 SV=1	0	FALSE		11.09	3	4	7	4	1501	148.2	8.62				1.8		6.71															3		2
FALSE	High	Master Protein	A0A088AKC6	Fibrillar collagen NC1 domain-containing protein OS=Apis mellifera OX=7460 PE=4 SV=1	0	FALSE		4.06	1	1	2	1	1755	178.4	5.33				0						0											1						1
FALSE	High	Master Protein	A0A088AK62	Fibroblast growth factor OS=Apis mellifera OX=7460 PE=3 SV=1	0	FALSE		4.198	7	2	2	2	481	54.9	9.6						2.5									0								1									1
FALSE	High	Master Protein	A0A087ZTT5	Flavin-containing monooxygenase OS=Apis mellifera OX=7460 GN=LOC410687 PE=3 SV=1	0	FALSE		36.38	33	10	13	10	419	48.3	6.8	7							4.87										5							8
FALSE	High	Master Protein	A0A088AJJ1	Flavodoxin-like domain-containing protein OS=Apis mellifera OX=7460 PE=4 SV=1	0	FALSE		44.473	43	5	18	5	190	21.2	4.78			6.65						4.2				0	12.38	9.03	2.53				1						1				1	2	3	2
FALSE	High	Master Protein	A0A088ASE8	Flavokinase domain-containing protein OS=Apis mellifera OX=7460 GN=LOC552134 PE=4 SV=1	0	FALSE		15.519	31	4	14	4	147	16.9	8.05	2.46		2	0				0	5.05	1.62	1.92	8.41						1		1	1				1	2	1	3	4
FALSE	High	Master Protein	A0A080V3M7	Formate acetyltransferase OS=Serratia marcescens OX=615 GN=pflB PE=4 SV=1	0	FALSE	Bacteria	11.991	5	4	5	3	760	85.2	5.94								5.76																	4
FALSE	High	Master Protein	A0A087ZPQ8	Fructose-bisphosphate aldolase OS=Apis mellifera OX=7460 PE=3 SV=1	0	FALSE		267.624	79	26	760	26	387	41.7	8.12	257.43	21.15	64.21	91.05	86.85	183.23	36.93	161.18	110.96	51.18	154.98	136.91	284.74	127.67	73.13	109.11	43.52	22	8	12	18	15	21	12	21	15	15	20	18	20	14	11	20	15
FALSE	High	Master Protein	A0A088ADU2	Fucosidase_C domain-containing protein OS=Apis mellifera OX=7460 GN=Fuca PE=3 SV=1	0	FALSE		7.726	5	2	5	2	471	55.7	6.47	0							0						1.89		0		1							1						2		1
FALSE	High	Master Protein	A0A0P0Q9Y2	Fumarate reductase flavoprotein subunit OS=Serratia marcescens OX=615 GN=A8A12_15015 PE=3 SV=1	0	FALSE	Bacteria	8.696	9	3	3	3	598	66.1	6.73								1.69																	3
FALSE	High	Master Protein	A0A087ZN22	Fumarylacetoacetase OS=Apis mellifera OX=7460 PE=3 SV=1	0	FALSE		9.714	12	3	5	3	374	41.6	6.19								0								2.01	2.02								1								2	2
FALSE	High	Master Protein	A0A088A8E6	G protein gamma domain-containing protein OS=Apis mellifera OX=7460 PE=4 SV=1	0.006	FALSE		3.32	0	1	12	1	2056	238.8	8.15			3.44		3.34	3.2			0				0							1		1	1			1				1
FALSE	High	Master Protein	A0A088A7S9	Gal_mutarotas_2 domain-containing protein OS=Apis mellifera OX=7460 GN=LOC551205 PE=3 SV=1	0	FALSE		35.143	16	11	12	11	925	106.8	6.27	2.35		0					5.82										1		1					10
FALSE	High	Master Protein	A0A087ZZX4	Galectin OS=Apis mellifera OX=7460 GN=galectin1 PE=4 SV=1	0	FALSE		37.892	26	7	74	7	482	49.8	5.2	24.45	1.91	4.04	17.76	22.02	11.79	2.51	4.79	3.6	10.29	16.43	20.43	5.91	1.86	4	0		3	1	1	4	5	4	2	2	1	4	3	4	2	3	2	2
FALSE	High	Master Protein	A0A087ZZN6	GB1/RHD3-type G domain-containing protein OS=Apis mellifera OX=7460 GN=atl PE=4 SV=1	0	FALSE		141.757	49	24	94	24	633	72.3	8.6	0		17.4		9.26	8.23			62.81			0	8.95	6.7	51.79			1		9		7	5			15			2	8	3	16
FALSE	High	Master Protein	A0A087ZN67	GB12811-like protein OS=Apis mellifera OX=7460 GN=LOC409962 PE=4 SV=1	0	FALSE		23.173	53	3	134	3	177	17.4	5.78	7.62		94.32	9.13	9.2	15.99	8		2.07	2.1		2.3	35.46		117.67	5.28	1.73	1		3	1	1	1	1		1	1		1	1		1	1	1
FALSE	High	Master Protein	H9K9P8	GFO_IDH_MocA domain-containing protein OS=Apis mellifera OX=7460 GN=LOC412231 PE=4 SV=1	0	FALSE		54.723	46	9	42	9	331	36.9	6.52	15.02			0		1.95		0	5.89		11.66	2.55			2.6	2.18	0	5			1		2		6	3		7	2			2	2	1
FALSE	High	Master Protein	A0A088AA33	GGACT domain-containing protein OS=Apis mellifera OX=7460 PE=4 SV=1	0	FALSE		15.869	28	4	16	4	172	20.1	6.39	0		2.03		0	0		0		0	1.8	0	0					1		2		1	1		1		1	1	1	2
FALSE	High	Master Protein	A0A088A2A8	Gln-synt_C domain-containing protein OS=Apis mellifera OX=7460 GN=GlnS PE=3 SV=1	0	FALSE		77.093	36	13	116	13	405	45.3	8.09	33.84	0	17.37	12.84	6.18	16.39	1.74	2.48	10.03	4.11	3.84	3.74	50.57	16.78	12.63	17.85	1.98	8	1	6	3	3	6	1	3	3	4	7	1	13	4	4	8	3
FALSE	High	Master Protein	Q14SN0	Globin 1 OS=Apis mellifera OX=7460 GN=glob1 PE=2 SV=1	0	FALSE		41.416	45	7	47	7	171	19.5	8.59	17.44	0		12.84	6.81	12.09		4.66		13.19	2.29	16.08	1.68	4.98	4.17		0	5	1		4	1	3		4		4	2	4	1	2	1		1
FALSE	High	Master Protein	A0A087ZRW7	GLOBIN domain-containing protein OS=Apis mellifera OX=7460 PE=3 SV=1	0	FALSE		26.707	31	6	23	6	216	24.8	5.55	1.62		1.91		10.33	4.05			10.75			0	0	2.14	3.39			2		1		4	2			4			1	1	1	2
FALSE	High	Master Protein	A0A087ZPX4	Glucosamine-6-phosphate isomerase OS=Apis mellifera OX=7460 GN=Oscillin PE=3 SV=1	0	FALSE		4.306	4	1	2	1	279	31.7	6.46					2.16											0						1											1
FALSE	High	Master Protein	A0A093SED5	Glucose-1-phosphate adenylyltransferase OS=Pectobacterium carotovorum subsp. carotovorum OX=555 GN=glgC PE=3 SV=1	0.01	FALSE	Bacteria	2.443	2	1	1	1	425	47.7	6.52								0																	1
FALSE	High	Master Protein	A0A0B4J2M6	Glucose-6-phosphate 1-dehydrogenase OS=Apis mellifera OX=7460 GN=LOC725325 PE=3 SV=1	0	FALSE		125.885	60	24	73	24	518	60.2	6.81	5.14		2.35			3.61			5.09		4.37		11.09	38.04	11.59	33.7	0	3		2			4			3		6		3	12	6	16	3
FALSE	High	Master Protein	A0A0G8BG45	Glucose-6-phosphate 1-dehydrogenase OS=Serratia marcescens OX=615 GN=zwf PE=3 SV=1	0.008	FALSE	Bacteria	2.812	2	1	1	1	491	55.8	6.49								0																	1
FALSE	High	Master Protein	A0A087ZS11	Glucose-6-phosphate 1-epimerase OS=Apis mellifera OX=7460 GN=LOC727456 PE=3 SV=1	0	FALSE		13.112	13	2	4	2	278	31.9	7.5	0											0				2.04		1											1				1
FALSE	High	Master Protein	A0A087ZPV4	Glucose-6-phosphate isomerase OS=Apis mellifera OX=7460 GN=LOC551154 PE=3 SV=1	0	FALSE		54.314	24	10	54	10	557	62.9	7.91	12.76		2.21	3.53	3.93	23.76		2.37	2.21		1.89	7.17	0	24.15		2.83	0	6		1	3	3	6		3	1		4	2	1	4		4	1
FALSE	High	Master Protein	A0A0G3SR84	Glucose-6-phosphate isomerase OS=Serratia marcescens OX=615 GN=pgi PE=3 SV=1	0	FALSE	Bacteria	7.17	5	2	2	2	548	61.1	6.49								0																	2
FALSE	High	Master Protein	A0A088APM4	Glucosylceramidase OS=Apis mellifera OX=7460 GN=LOC409708 PE=3 SV=1	0	FALSE		16.652	14	5	10	5	522	59.3	5.57																7.18	1.86																5	3
FALSE	High	Master Protein	A0A0G3SJK2	Glutamate/aspartate ABC transporter substrate-binding protein OS=Serratia marcescens OX=615 GN=gltI PE=4 SV=1	0	FALSE	Bacteria	22.534	14	3	15	2	298	33.2	8.72								24.03			7.5					0									3			2					1
FALSE	High	Master Protein	A0A088A6Y8	Glutamine amidotransferase type-2 domain-containing protein OS=Apis mellifera OX=7460 PE=4 SV=1	0	FALSE		22.704	5	7	12	7	1909	211.9	7.34	0					0			2.09		0		2.12	2.02	2.19			2					1			1		1		3	3	1
FALSE	High	Master Protein	A0A2G4QJ65	Glutamine synthetase OS=Serratia marcescens OX=615 GN=glnA PE=3 SV=1	0	FALSE	Bacteria	12.938	9	3	5	3	469	51.8	5.34								3.83																	3
FALSE	High	Master Protein	A0A093SBI3	Glutamine--fructose-6-phosphate aminotransferase [isomerizing] OS=Pectobacterium carotovorum subsp. carotovorum OX=555 GN=glmS PE=3 SV=1	0	FALSE	Bacteria	4.21	2	1	1	1	610	67	5.85								0																	1
FALSE	High	Master Protein	A0A087ZS80	Glutaredoxin domain-containing protein OS=Apis mellifera OX=7460 GN=Grx1 PE=4 SV=1	0	FALSE		28.816	55	6	30	6	98	10.9	6.52	20.75				5.65	4.11		5.46		0	4.46	4.27		2.55		0	1.81	4				1	2		3		2	3	3		2		3	2
FALSE	High	Master Protein	A0A088A6K7	Glutaredoxin domain-containing protein OS=Apis mellifera OX=7460 GN=LOC551916 PE=4 SV=1	0	FALSE		8.062	11	2	2	2	192	21.9	4.37									2.19					1.92												1					1
FALSE	High	Master Protein	A0A088ADE6	Glutaredoxin domain-containing protein OS=Apis mellifera OX=7460 GN=Trx/Gtx PE=4 SV=1	0	FALSE		16.281	17	3	13	3	223	25.3	5.26	10.61			1.62				2.32			3.66	2.25				2.1	0	3			1				2			2	1				1	1
FALSE	High	Master Protein	A0A088A226	Glutaredoxin OS=Apis mellifera OX=7460 GN=Grx2 PE=3 SV=1	0.001	FALSE		3.772	13	1	3	1	133	15	7.99	2.04										0			2.75				1										1			1
FALSE	High	Master Protein	A0A093STT1	Glutaredoxin OS=Pectobacterium carotovorum subsp. carotovorum OX=555 GN=KP17_02720 PE=3 SV=1	0	FALSE	Bacteria	6.034	22	2	2	1	116	13	4.84								2.82																	2
FALSE	High	Master Protein	A0A0F6KRM0	Glutaredoxin OS=Serratia marcescens OX=615 GN=grxD PE=3 SV=1	0	FALSE	Bacteria	6.807	29	2	2	1	115	13	4.84								2.82																	2
FALSE	High	Master Protein	Q7YXM2	Glutathione peroxidase OS=Apis mellifera ligustica OX=7469 GN=Gtpx-1 PE=2 SV=1	0	FALSE		52.327	68	11	111	11	168	19.1	7.78	33.87		11.86	1.86	15.55	14.29	0	9.82	2.54	10.37	18.72	21.68	3.64	6.42	2.6	17.03	3.87	8		4	3	4	6	2	4	2	5	8	9	2	1	1	8	3
FALSE	High	Master Protein	A0A088AB47	Glutathione peroxidase OS=Apis mellifera OX=7460 GN=Gtpx2 PE=3 SV=1	0	FALSE		56.771	53	10	114	10	201	23.1	5.91	30.47	0	17.27	5.69	11.05	15.39	2.07	28.32	2.12	6.29	0	9.13	2.03	0	1.61	17.6	13.37	7	1	5	5	5	4	2	8	1	5	6	6	1	1	1	5	8
FALSE	High	Master Protein	C3VMN1	Glutathione S-transferase S1 OS=Apis mellifera OX=7460 GN=GstS1 PE=2 SV=1	0	FALSE		19.891	19	4	33	4	204	23.7	8.81	7.1		1.95	7.08	2.24		0	0	2.03	0	0	1.81		0	10.51	0	0	2		2	4	1		2	2	1	2	1	2		1	3	1	1
FALSE	High	Master Protein	V5T6H1	Glyceraldehyde 3-phosphate dehydrogenase OS=Lactobacillus helsingborgensis OX=1218494 GN=gap PE=3 SV=1	0	FALSE		4.665	8	2	5	1	338	36.3	6.05	0										0			3.5		0		1										1			1		1
FALSE	High	Master Protein	R0MC05	Glyceraldehyde-3-phosphate dehydrogenase 2 OS=Nosema bombycis (strain CQ1 / CVCC 102059) OX=578461 GN=G3P2 PE=4 SV=1	0	FALSE	Nosema	5.575	7	1	13	1	203	22.6	8.38	2.55													13.75		2.29		1													1		1
FALSE	High	Master Protein	A0A088AHC8	Glyceraldehyde-3-phosphate dehydrogenase OS=Apis mellifera OX=7460 GN=Gapdh PE=2 SV=1	0	FALSE		118.556	48	12	254	10	333	35.9	8.02	41.08		15.75	21.54	34.48	41.81	2.58	4.76	88.19		9.63	19.99	26.43	229.95	37.07	62.67	5.93	8		5	7	8	9	1	3	10		5	7	8	11	6	10	4
FALSE	High	Master Protein	A0A093URM9	Glyceraldehyde-3-phosphate dehydrogenase OS=Pectobacterium carotovorum subsp. carotovorum OX=555 GN=KP17_17140 PE=3 SV=1	0	FALSE	Bacteria	25.73	27	7	35	4	331	35.5	6.89	3.7				3.66	1.93		19.02	4.19		3.84	1.68		3.93		1.61		1				1	1		7	1		5	1		1		3
FALSE	High	Master Protein	A0A0P0QFJ0	Glyceraldehyde-3-phosphate dehydrogenase OS=Serratia marcescens OX=615 GN=AR325_16545 PE=3 SV=1	0	FALSE	Bacteria	22.629	17	5	28	2	331	35.5	6.81	3.7				3.66	1.93		14.54	4.19		3.26	1.68		3.93		1.61		1				1	1		5	1		4	1		1		2
FALSE	High	Master Protein	O61368	Glycerol-3-phosphate dehydrogenase [NAD(+)] OS=Apis mellifera OX=7460 GN=Gpdh PE=3 SV=1	0	FALSE		83.915	54	16	101	16	363	40.1	7.06	20.3		0	8.27	2.23	24.07		8.82	14.39	0	7.2	17.29	3.79	36.83	12.17	25.91	0	8		1	4	1	7		10	3	2	8	7	2	8	2	8	2
FALSE	High	Master Protein	A0A087ZRH2	Glycerol-3-phosphate dehydrogenase [NAD(+)] OS=Apis mellifera OX=7460 PE=3 SV=1	0	FALSE		58.528	65	13	67	13	285	31.2	5.57	14.32			0		17.72		19.78		0	14.75	4.19	1.91	4.9		12.9	0	6			1		7		10		1	9	3	1	2		7	3
FALSE	High	Master Protein	A0A087ZSL0	Glycerol-3-phosphate dehydrogenase OS=Apis mellifera OX=7460 PE=3 SV=1	0	FALSE		236.944	54	35	311	35	753	84.2	6.81	31.65		91.15	4.63	79.6	64.75	4.29		101.81	2.05	14.76	73.26	60.31	74.01	112.61	7.38		16		21	3	20	19	2		20	2	8	22	14	17	18	4
FALSE	High	Master Protein	A0A087ZUC1	Glyco_18 domain-containing protein OS=Apis mellifera OX=7460 GN=100577156 PE=4 SV=1	0	FALSE		207.166	58	18	348	18	390	43.8	6.27	66.41		26.97			6.91	3.38	311.03		0	180.01	20.91	7.99			27.2	39.45	13		7			3	3	18		1	18	8	2			9	12
FALSE	High	Master Protein	A0A088AMK2	Glyco_18 domain-containing protein OS=Apis mellifera OX=7460 PE=4 SV=1	0	FALSE		165.808	65	19	528	19	449	50.1	8.44	207.36	58.36	46.07	58.81	96.19	49.45	55.17	70.67	47.9	81.23	26.14	25.06	74.7	47.51	60.98	32.59	51.63	16	15	12	12	14	12	11	14	11	14	9	7	11	9	12	9	13
FALSE	High	Master Protein	A0A088A3B7	Glyco_transf_20 domain-containing protein OS=Apis mellifera OX=7460 PE=4 SV=1	0	FALSE		102.051	37	23	96	23	771	87.2	6.62	20.35	0	8.57	2.17	4.62	26.5	0	0	33.05	1.68	24	12.33	4.39	0	23.65	8.41	0	8	1	4	3	2	9	1	2	10	3	15	5	4	1	7	7	1
FALSE	High	Master Protein	A0A088ARU9	Glycogen [starch] synthase OS=Apis mellifera OX=7460 GN=LOC552328 PE=3 SV=1	0	FALSE		22.435	12	5	8	5	692	79.6	6.42					3.98				7.7						9.03							2				2						3
FALSE	High	Master Protein	A0A087ZVX4	GMC_OxRdtase_N domain-containing protein OS=Apis mellifera OX=7460 GN=GMCOX12 PE=4 SV=1	0	FALSE		20.98	14	6	10	6	622	69.4	6.96								0	2.57		2.6					6.89	2.51								1	1		1					2	3
FALSE	High	Master Protein	A0A088A031	GMC_OxRdtase_N domain-containing protein OS=Apis mellifera OX=7460 PE=4 SV=1	0	FALSE		183.24	50	23	231	23	615	67.8	6.84	16.66	1.82	50.25		122.95	54.68		1.76	8.83		16.51	45.12	37.89		2.46	37.74	100.72	7	4	14		18	14		3	4		9	12	8		1	13	18
FALSE	High	Master Protein	A0A087ZVX2	GMC_OxRdtase_N domain-containing protein OS=Apis mellifera OX=7460 PE=4 SV=1	0	FALSE		59.287	28	13	38	13	650	73	6.25	5.13		0	1.7		6.36	5.29	1.92			2.5					15.65	2.1	3		1	2		3	5	2			3					9	2
FALSE	High	Master Protein	A0A087ZPR9	GMP reductase OS=Apis mellifera OX=7460 GN=LOC552316 PE=3 SV=1	0.008	FALSE		2.988	4	1	4	1	349	37.9	7.39	0			0	0	0												1			1	1	1
FALSE	High	Master Protein	A0A087ZP87	GOLD domain-containing protein OS=Apis mellifera OX=7460 GN=102655603 PE=3 SV=1	0	FALSE		4.468	13	1	1	1	202	23.3	6.52					0																	1
FALSE	High	Master Protein	A0A088AGB1	GOLD domain-containing protein OS=Apis mellifera OX=7460 GN=LOC412554 PE=3 SV=1	0	FALSE		33.452	32	4	28	4	215	25.3	7.01	4.88		6.08	6.58	16.98				6.52	12.21		6.03		6.44	12.14	3.11	0	3		1	2	3				2	3		2		2	2	2	1
FALSE	High	Master Protein	A0A088ANQ5	GOLD domain-containing protein OS=Apis mellifera OX=7460 GN=LOC552602 PE=3 SV=1	0	FALSE		15.408	21	4	19	4	205	23.4	5.62	4.41			0	8.67	2.14			4.07	1.68		1.72	0	1.74	2.33			2			2	2	1			2	2		1	1	1	1
FALSE	High	Master Protein	A0A087ZNT8	GOLD domain-containing protein OS=Apis mellifera OX=7460 PE=3 SV=1	0	FALSE		20.763	25	5	35	5	202	23.4	7.33	8.15		11.35	5.7	14.46	7.29	2.36		10.33	6.74		6.71		7.86	10.5	5.32		2		3	3	3	1	1		2	2		1		1	2	1
FALSE	High	Master Protein	A0A088AHI6	GP-PDE domain-containing protein OS=Apis mellifera OX=7460 PE=4 SV=1	0	FALSE		31.364	21	4	8	4	273	32.2	8.35			3.14		2.66				5.51				1.78		5.36					2		1				1				1		1
FALSE	High	Master Protein	A0A087ZV12	Gram-negative bacteria-binding protein 1-2 OS=Apis mellifera OX=7460 GN=B-gluc1 PE=4 SV=1	0	FALSE		11.848	13	5	12	5	478	54.6	6.48	2.09				0	0		0								0	0	2				1	1		2								2	4
FALSE	High	Master Protein	A0A088AGJ6	GrpE protein homolog OS=Apis mellifera OX=7460 PE=3 SV=1	0	FALSE		9.291	15	3	8	3	232	26.4	8.1	1.85		2.19			1.81						2.65		2.15		0		1		1			2						2		1		1
FALSE	High	Master Protein	A0A088A654	GST C-terminal domain-containing protein OS=Apis mellifera OX=7460 GN=100577000 PE=4 SV=1	0	FALSE		5.299	9	1	1	1	171	20.1	5.21									2.79																	1
FALSE	High	Master Protein	A0A088ADT5	GST N-terminal domain-containing protein OS=Apis mellifera OX=7460 GN=GstU1 PE=4 SV=1	0	FALSE		11.102	54	2	9	2	67	7.7	4.83	7.83					3.72		2.16	3.65		2.3	3.39	2.54					2					1		1	1		1	1	1
FALSE	High	Master Protein	A0A088AI98	GST N-terminal domain-containing protein OS=Apis mellifera OX=7460 PE=3 SV=1	0	FALSE		4.37	11	2	3	2	218	25.2	6.86						0						0				0							1						1				1
FALSE	High	Master Protein	A0A0B4J2L9	GTP:AMP phosphotransferase, mitochondrial OS=Apis mellifera OX=7460 GN=Adk3 PE=3 SV=1	0.007	FALSE		3.206	4	1	1	1	224	25.1	9.48	0																	1
FALSE	High	Master Protein	A0A087ZWI7	GTP-binding nuclear protein OS=Apis mellifera OX=7460 GN=ran PE=3 SV=1	0	FALSE		51.203	58	9	121	9	215	24.6	7.42	28.57	0	29.93	13.73	26.59	25.33	1.92	6.84	23.13	6.75	18.55	18	10.02	4.55	5.59	11.09		7	2	6	6	6	5	3	3	8	4	7	7	3	1	1	2
FALSE	High	Master Protein	A0A088AAP5	Guanine nucleotide-binding protein subunit gamma OS=Apis mellifera OX=7460 GN=LOC725453 PE=3 SV=1	0.006	FALSE		3.429	17	1	2	1	72	8.5	6.06				2.34																	1
FALSE	High	Master Protein	A0A088A648	Guanylate kinase-like domain-containing protein OS=Apis mellifera OX=7460 GN=LOC552023 PE=4 SV=1	0.007	FALSE		3.176	8	1	1	1	208	23.8	8.12															2.75																	1
FALSE	High	Master Protein	A0A087ZRE7	H/ACA ribonucleoprotein complex subunit OS=Apis mellifera OX=7460 GN=LOC413686 PE=3 SV=1	0	FALSE		9.433	18	3	4	3	201	21	11.02			2.57						0						4.48					1						1						2
FALSE	High	Master Protein	A0A088A802	H15 domain-containing protein OS=Apis mellifera OX=7460 PE=3 SV=1	0	FALSE		18.735	15	4	16	4	295	32.9	10.33	0		10.41		2.06	7.98							4.35		5.56	1.96		1		2		1	3							1		2	2
FALSE	High	Master Protein	A0A088A4Q4	HABP4_PAI-RBP1 domain-containing protein OS=Apis mellifera OX=7460 GN=LOC409410 PE=4 SV=1	0	FALSE		21.324	13	4	11	4	414	46.9	8.87	3.87				3.32	3.16			3.5			6.31		2.19	3.21			2				1	2			1			2		1	1
FALSE	High	Master Protein	H9KUJ6	HATPase_c domain-containing protein OS=Apis mellifera OX=7460 GN=LOC412150 PE=3 SV=1	0	FALSE		203.12	60	37	206	35	798	92.1	5.07	25.01		50.02	13.2	19.35	27.29		1.96	70.95	6.1	4.29	36.55	8.49	44.2	60.07	22.84	4.03	16		16	8	9	12		1	20	8	8	17	4	13	18	14	5
FALSE	High	Master Protein	A0A088A2L4	HATPase_c domain-containing protein OS=Apis mellifera OX=7460 PE=3 SV=1	0	FALSE		131.669	38	25	145	14	755	87.1	5.2	28.63	2.44	15.65	13.54	15.58	7.68		4.83	35.52	5.12	8.85	7.52	19.32	41.09	36.51	21.16	1.74	13	1	5	7	7	2		3	9	3	7	4	8	10	9	8	1
FALSE	High	Master Protein	A0A087ZQD3	HATPase_c domain-containing protein OS=Apis mellifera OX=7460 PE=3 SV=1	0	FALSE		308.391	58	43	398	30	724	83.4	5.05	85.12	2.44	46.43	44.16	36.6	48.99	0	16.89	98.6	8.94	20.45	35.86	54.92	166.84	74.65	53.18	3.62	28	3	13	17	16	14	1	9	21	7	14	16	19	22	18	20	6
FALSE	High	Master Protein	A7XZB1	Hexamerin 110 OS=Apis mellifera OX=7460 GN=hex110 PE=2 SV=1	0	FALSE		42.584	15	10	14	10	1008	111.9	6.93		0		2.5													10.71		1		4													7
FALSE	High	Master Protein	Q6J4Q1	Hexamerin OS=Apis mellifera OX=7460 GN=HEX70b PE=2 SV=1	0	FALSE		7.451	6	3	6	2	683	79.5	7.23						1.32	0	1.52									3.82						1	1	1									2
FALSE	High	Master Protein	A0A088AQM3	HIG1 domain-containing protein OS=Apis mellifera OX=7460 GN=102656599 PE=4 SV=1	0	FALSE		10.179	21	2	10	2	106	11.9	9.36	2.58		6.05	5.02	6.37	2.69	1.89					2.9						1		1	1	1	1	1					1
FALSE	High	Master Protein	A0A093SPA4	Histidine ABC transporter substrate-binding protein HisJ OS=Pectobacterium carotovorum subsp. carotovorum OX=555 GN=KP17_09215 PE=3 SV=1	0	FALSE	Bacteria	5.169	7	1	1	1	259	28	5.45								2.79																	1
FALSE	High	Master Protein	A0A088A803	Histone H2A OS=Apis mellifera OX=7460 GN=726468 PE=3 SV=1	0	FALSE		90.571	60	6	305	4	124	13.4	10.73	38.81	3.72	54.06	20.15	45.73	39.16	12.13	2.06	39.08	20.01	0	30.49	74.67	66.28	135.88	93.14	34.62	4	2	4	3	4	4	3	1	4	4	2	4	4	5	4	5	3
FALSE	High	Master Protein	A0A087ZWQ7	Histone H2A OS=Apis mellifera OX=7460 GN=His2Av PE=3 SV=1	0	FALSE		40.901	54	6	174	4	128	13.4	10.58	14.21	3.72	20.4	9.96	21.41	12.43	6.59		11.12	10.19	0	11.44	28.32	23.4	71.67	31.07	4.21	2	1	4	2	3	2	2		2	2	1	2	4	3	5	4	2
FALSE	High	Master Protein	A0A088A824	Histone H2B OS=Apis mellifera OX=7460 GN=725344 PE=3 SV=1	0	FALSE		57.842	42	6	326	4	123	13.7	10.39	44.84	5.48	71.86	24.13	49.75	38.2	9.39	4.37	39.46	22.08	0	29.33	92.38	33.37	92.03	34.83	1.69	5	3	5	3	6	4	3	1	4	4	1	4	5	4	4	4	4
FALSE	High	Master Protein	A0A088A805	Histone H2B OS=Apis mellifera OX=7460 GN=726487 PE=3 SV=1	0	FALSE		28.505	28	3	154	1	126	14	10.32	3.42	0	40.36	1.65	27.35	15.73	0		15.3	5.52		13.74	14.8	0	6.9	3.43	1.69	2	1	3	2	3	2	1		2	2		2	2	1	1	1	1
FALSE	High	Master Protein	A0A088A825	Histone H2B OS=Apis mellifera OX=7460 GN=LOC725238 PE=3 SV=1	0	FALSE		88.749	34	10	177	10	224	23.6	10.49	43.85		87.65	6.9	68.21	49.24	2.53	2.02	34.49	17.3		36.53	49.1	6.57	41.62	4.97		6		9	2	6	5	1	1	3	2		4	9	2	5	3
FALSE	High	Master Protein	H9K244	Histone H3 OS=Apis mellifera OX=7460 GN=LOC726542 PE=3 SV=1	0	FALSE		50.445	49	6	161	1	136	15.4	11.27	12.18	1.54	100.42	11.71	39	25.03	2.18		33.36	7.7		14.06	19.26	14.05	28.15	14.1		4	1	6	4	6	6	3		6	4		6	4	2	3	2
FALSE	High	Master Protein	H9K759	Histone H3 OS=Apis mellifera OX=7460 GN=LOC726692 PE=3 SV=1	0	FALSE		41.586	49	6	159	1	136	15.3	11.27	17.57	1.54	77.87	11.71	40.54	30.73	2.18		33.32	13.24		11.98	19.26	1.6	28.89	1.94		5	1	6	5	6	6	3		6	4		6	4	1	3	1
FALSE	High	Master Protein	H9KL77	Histone H4 OS=Apis mellifera OX=7460 GN=724757 PE=3 SV=1	0	FALSE		104.787	53	9	546	9	103	11.4	11.36	70.88	29.52	138.73	55.72	95.53	75.21	34.52	14.5	70.85	52.9	6.03	69.25	89.24	59.22	287.51	86.65	16.18	7	5	9	7	8	6	7	4	7	7	4	8	6	6	7	6	4
FALSE	High	Master Protein	A0A088ANV4	HIT domain-containing protein OS=Apis mellifera OX=7460 GN=LOC552803 PE=4 SV=1	0.008	FALSE		2.973	8	1	1	1	142	16.8	8.73															0																	1
FALSE	High	Master Protein	A0A088AA27	HIT domain-containing protein OS=Apis mellifera OX=7460 PE=4 SV=1	0	FALSE		34.217	40	3	51	3	126	14	7.59	11.8		7.85	8.58	3.65	13.48	4.47	15.03	3.24	8.23	11.36	16.86	4.5	10.51	4.29	11.12	2.83	1		1	1	1	2	1	2	1	2	3	2	1	2	1	2	2
FALSE	High	Master Protein	A0A088AV07	HMA domain-containing protein OS=Apis mellifera OX=7460 GN=LOC725138 PE=4 SV=1	0	FALSE		11.14	43	2	14	2	72	8	6.54	5.19				0	1.73		6.26			2	3.63				1.72	0	2				1	1		2			1	2				1	1
FALSE	High	Master Protein	A0A088AH79	HMG box domain-containing protein OS=Apis mellifera OX=7460 GN=LOC412077 PE=4 SV=1	0	FALSE		4.259	2	1	1	1	718	79.4	7.06															0																	1
FALSE	High	Master Protein	A0A087ZYL0	HTH cro/C1-type domain-containing protein OS=Apis mellifera OX=7460 PE=4 SV=1	0.006	FALSE		3.372	0	1	1	1	1609	172.7	5.11			1.8																	1
FALSE	High	Master Protein	Q08169	Hyaluronidase OS=Apis mellifera OX=7460 PE=1 SV=1	0	FALSE		32.411	29	9	42	9	382	44.2	8.51				10.36	2.64		1.7			0	14.19					13.37	0				6	1		4			3	7					7	3
FALSE	High	Master Protein	Q10416	Hymenoptaecin OS=Apis mellifera OX=7460 PE=2 SV=1	0	FALSE		22.961	37	4	43	4	129	14.5	9.42	22.11	1.62				10.86	0	12.45		2.03	0					21.06	0	4	1				3	1	4		2	2					3	1
FALSE	High	Master Protein	Q6WL04	Hyperpolarization-activated ion channel OS=Apis mellifera OX=7460 PE=2 SV=1	0	FALSE		16.236	7	3	6	3	632	72.7	7.5			4.24						3.24				0		5.31					2						1				1		2
FALSE	High	Master Protein	A0A088AEI7	I/LWEQ domain-containing protein OS=Apis mellifera OX=7460 PE=4 SV=1	0	FALSE		69.693	39	14	39	14	490	53.3	6.4	2.95		6.32		2.56	9.09	10.11		16.16			1.96	7.39	0	16.15			3		3		1	5	7		6			1	5	1	5
FALSE	High	Master Protein	A0A096XH51	Icarapin variant 1 (Fragment) OS=Apis mellifera carnica OX=88217 GN=icarapin PE=2 SV=1	0	FALSE		41.536	30	6	104	6	204	22.7	4.56	12.53	6.84		36.5	26.5	14.59	19.74	13.55	0	8.02	35.9	5.63			4.72	23.67	17.7	5	3		6	5	4	5	4	1	4	4	3			2	5	4
FALSE	High	Master Protein	A0A087ZMS1	Importin N-terminal domain-containing protein OS=Apis mellifera OX=7460 GN=emb PE=4 SV=1	0	FALSE		25.188	8	5	8	5	1062	122.3	5.6	0								9.31						2.11	0		1								4						1	1
FALSE	High	Master Protein	A0A088A9P3	Importin N-terminal domain-containing protein OS=Apis mellifera OX=7460 GN=LOC412817 PE=4 SV=1	0	FALSE		8.378	4	3	5	3	1080	121.4	4.84	0				0	0			0									1				1	1			1
FALSE	High	Master Protein	A0A088ABZ7	Importin N-terminal domain-containing protein OS=Apis mellifera OX=7460 PE=4 SV=1	0	FALSE		20.003	6	4	4	4	1029	117.8	5.03									6.05						0											3						1
FALSE	High	Master Protein	A0A087ZMX9	Importin N-terminal domain-containing protein OS=Apis mellifera OX=7460 PE=4 SV=1	0	FALSE		62.497	19	10	22	10	890	98.8	4.86	1.67								25.65				3	8.82	7.29	6.73		1								9				1	4	2	3
FALSE	High	Master Protein	A0A088ADV7	Importin subunit alpha OS=Apis mellifera OX=7460 GN=Kap-alpha1 PE=3 SV=1	0	FALSE		6.745	5	2	3	2	530	58.7	5.34									2.55				0													2				1
FALSE	High	Master Protein	A0A088ANJ0	Importin subunit alpha OS=Apis mellifera OX=7460 GN=Kap-alpha3 PE=3 SV=1	0	FALSE		27.5	17	4	12	4	516	57.3	5.17	0					0			14.66		0		3.21	2.87	3.46	0		1					1			4		1		1	1	1	1
FALSE	High	Master Protein	A0A088A2D3	Innexin OS=Apis mellifera OX=7460 GN=inx PE=3 SV=1	0	FALSE		13.76	21	2	12	2	149	17	6.65			4.76	2.67	0	5.39			2.25			0			5.19	2.56				1	2	1	2			1			1			1	1
FALSE	High	Master Protein	A0A088A2D4	Innexin OS=Apis mellifera OX=7460 GN=inx PE=3 SV=1	0	FALSE		15.176	13	3	17	3	256	30.1	8.72			12.47	2.19	2.6	6.84			2.41			4.1			6.34	2.49				3	1	1	2			1			2			1	1
FALSE	High	Master Protein	A0A088A2C9	Innexin OS=Apis mellifera OX=7460 GN=inx2 PE=3 SV=1	0	FALSE		46.209	25	7	52	7	358	41.5	6.84			45.32	7.16	3.4	13.18			11.45	0		0	6.55	2.13	13.7	0				6	5	2	4			3	1		2	2	1	3	1
FALSE	High	Master Protein	A0A088AID2	Innexin OS=Apis mellifera OX=7460 GN=inx3 PE=3 SV=1	0	FALSE		22.185	20	6	26	6	396	44.6	7.68			15.92	2.16		11.07			4.23	1.92		2.05	4.73		6.12	2.06				5	1		4			2	2		1	3		2	1
FALSE	High	Master Protein	A0A088A653	Inosine-5'-monophosphate dehydrogenase OS=Apis mellifera OX=7460 GN=ras PE=3 SV=1	0	FALSE		10.281	12	5	7	5	523	56.6	8.15			0						0			0	0		4.85	0				1						1			1	1		2	1
FALSE	High	Master Protein	P23302	Integration host factor subunit alpha OS=Serratia marcescens OX=615 GN=ihfA PE=3 SV=2	0	FALSE	Bacteria	8.451	20	2	3	2	99	11.2	9.63								3.86																	2
FALSE	High	Master Protein	A0A088AEN2	Integrin alpha-PS2 OS=Apis mellifera OX=7460 PE=3 SV=1	0	FALSE		153.04	26	31	136	31	1525	172.2	5.86	4.32		34.35	0	25.49	59.83	14.32		48.76			24.72	22.72	8.34	52.38	0		3		10	1	10	19	9		17			9	11	5	13	1
FALSE	High	Master Protein	A0A088A788	Integrin beta OS=Apis mellifera OX=7460 PE=3 SV=1	0	FALSE		108.466	34	20	97	20	761	84.9	5.49	0		26.93	0	21.23	35.3	2.1		26.67			10.39	10.52		36.5			2		9	1	10	15	4		10			7	6		11
FALSE	High	Master Protein	A0A088ACX9	Integrin_alpha2 domain-containing protein OS=Apis mellifera OX=7460 GN=mew PE=3 SV=1	0	FALSE		18.307	7	7	8	7	1101	123.7	6.18			5.4			0							3.81							4			1							3
FALSE	High	Master Protein	G9F9Z6	IRP30 OS=Apis mellifera OX=7460 GN=IRP30 PE=4 SV=1	0	FALSE		29.178	35	8	18	8	274	30.4	6.76	0							2.49		8.94							2.23	2							4		6							3
FALSE	High	Master Protein	A0A088AKC5	Iso_dh domain-containing protein OS=Apis mellifera OX=7460 GN=LOC410396 PE=4 SV=1	0	FALSE		95.786	52	14	92	14	384	42.4	8.97	37.53		10.63	0	3.74	19.1			39.61		24.86	19.48	13.85	23.15	6.77	3.02		7		4	1	1	4			7		10	4	4	7	2	4
FALSE	High	Master Protein	A0A088AA38	Isochorismatase domain-containing protein OS=Apis mellifera OX=7460 GN=LOC410420 PE=4 SV=1	0	FALSE		26.685	31	5	34	5	203	22.4	8.35	5.44		2.8	3.73		2.21			3.95		9.15	4.24		6.07	9.72	8.02		3		1	2		1			1		4	2		5	4	4
FALSE	High	Master Protein	A0A088AAU7	Isocitrate dehydrogenase [NAD] subunit, mitochondrial OS=Apis mellifera OX=7460 GN=LOC409292 PE=3 SV=1	0	FALSE		135.674	51	16	191	16	358	39.1	7.59	82.27		28.45	6.01	2.09	25.83		3.96	30.43	0	38.38	19.47	45.82	35.05	62.51	21.87		13		7	4	3	10		3	7	1	11	7	13	9	13	8
FALSE	High	Master Protein	A0A088ABZ1	Isocitrate dehydrogenase [NAD] subunit, mitochondrial OS=Apis mellifera OX=7460 GN=LOC552128 PE=3 SV=1	0	FALSE		62.281	43	11	75	11	374	40.9	8.7	26.54		4.6			15.09			18.42		6.98	4.81	5.59	11.65	19.17	0		9		4			7			7		7	5	4	4	5	2
FALSE	High	Master Protein	A0A088A1Z9	Isocitrate dehydrogenase [NADP] OS=Apis mellifera OX=7460 PE=3 SV=1	0	FALSE		106.78	55	20	166	20	409	46.6	7.3	42.82		15.88	5.15	8.95	23.06	1.73	18.62	23.91	1.65	18.64	12.82	18.58	17.67	12.06	17.66	4.31	14		7	2	4	7	2	11	9	3	11	8	10	5	5	8	5
FALSE	High	Master Protein	A0A093SSK5	Isocitrate dehydrogenase [NADP] OS=Pectobacterium carotovorum subsp. carotovorum OX=555 GN=KP17_00210 PE=4 SV=1	0	FALSE	Bacteria	10.592	9	3	8	1	417	45.9	5.2								8.47			0														3			1
FALSE	High	Master Protein	A0A2G4QGA9	Isocitrate dehydrogenase [NADP] OS=Serratia marcescens OX=615 GN=CS371_09695 PE=4 SV=1	0	FALSE	Bacteria	22.243	14	6	14	4	417	45.7	5.78								10.82			0														6			1
FALSE	High	Master Protein	A0A093UR78	Isocitrate lyase OS=Pectobacterium carotovorum subsp. carotovorum OX=555 GN=KP17_17710 PE=4 SV=1	0.008	FALSE	Bacteria	2.893	4	1	1	1	435	48	5.5								0																	1
FALSE	High	Master Protein	A0A087ZRF8	J domain-containing protein OS=Apis mellifera OX=7460 GN=LOC408863 PE=4 SV=1	0	FALSE		23.676	37	4	12	4	176	19.9	6.21	6.91					3.35		0			0	0	2.55	3.37		0		2					1		1			2	1	1	1		2
FALSE	High	Master Protein	A0A087ZSR8	J domain-containing protein OS=Apis mellifera OX=7460 GN=LOC408966 PE=4 SV=1	0	FALSE		20.903	13	2	7	2	290	32.6	9.47						2.3			0				3.13		4.3	0							1			1				1		1	1
FALSE	High	Master Protein	A0A087ZY83	J domain-containing protein OS=Apis mellifera OX=7460 GN=LOC409991 PE=4 SV=1	0.001	FALSE		3.991	2	1	3	1	561	64	8.06					1.69	2.29						2.11										1	1						1
FALSE	High	Master Protein	A0A088A635	J domain-containing protein OS=Apis mellifera OX=7460 GN=LOC411071 PE=4 SV=1	0	FALSE		77.337	51	16	92	16	354	39.1	9.13	24.36		9.04	0	23.3	30.65			41.33		3.93	32.75	12.54	18.38	23.02	2.46		7		2	1	8	9			9		4	8	6	5	6	4
FALSE	High	Master Protein	A0A088ABA4	J domain-containing protein OS=Apis mellifera OX=7460 GN=LOC412505 PE=4 SV=1	0	FALSE		19.738	5	3	5	3	761	88.2	6.52													1.65	0	6.92															1	1	3
FALSE	High	Master Protein	A0A088ATN4	J domain-containing protein OS=Apis mellifera OX=7460 PE=4 SV=1	0	FALSE		11.437	5	4	7	4	830	95.4	6.74					6.54	1.98			3.33													3	3			1
FALSE	High	Master Protein	A0A088AEP5	J domain-containing protein OS=Apis mellifera OX=7460 PE=4 SV=1	0	FALSE		11.774	13	2	5	2	223	24.4	5.11	1.94			1.67	2.44								0		3.46			1			1	1								1		1
FALSE	High	Master Protein	A0A088AJE9	J domain-containing protein OS=Apis mellifera OX=7460 PE=4 SV=1	0	FALSE		18.245	16	4	7	4	358	40.4	5.85				0											6.33	0					1											3	3
FALSE	High	Master Protein	A0A088AUA1	KA1 domain-containing protein OS=Apis mellifera OX=7460 PE=4 SV=1	0	FALSE		5.952	13	1	2	1	135	15.2	8.94					2.54				3.35													1				1
FALSE	High	Master Protein	A0A087ZMR7	KASH domain-containing protein OS=Apis mellifera OX=7460 PE=4 SV=1	0	FALSE		79.836	3	18	21	18	7454	850.8	4.86									12.28				4.18	0	21.98											7				2	1	10
FALSE	High	Master Protein	A0A088AEW6	Kazal-like domain-containing protein OS=Apis mellifera OX=7460 GN=102656354 PE=4 SV=1	0	FALSE		32.811	34	2	39	2	119	12.4	8.54	6.01	0		16.58		6.5		26.42	3.65	0				0		4.1	10.71	1	1		1		1		2	1	1				1		1	1
FALSE	High	Master Protein	A0A088AEW2	Kazal-like domain-containing protein OS=Apis mellifera OX=7460 GN=LOC552461 PE=4 SV=1	0.009	FALSE		2.592	13	1	2	1	131	14.5	6								0									0								1									1
FALSE	High	Master Protein	A0A2G4QHU9	Ketol-acid reductoisomerase (NADP(+)) OS=Serratia marcescens OX=615 GN=ilvC PE=3 SV=1	0	FALSE	Bacteria	10.885	12	4	4	4	491	53.7	5.43								0																	4
FALSE	High	Master Protein	A0A088AGZ4	KH domain-containing protein OS=Apis mellifera OX=7460 GN=408710 PE=4 SV=1	0	FALSE		23.312	19	6	24	6	397	45.3	8.84	2.14		2.25		2.24	4.08			2.54			1.96	0	2.29	4.46			1		2		2	4			2			1	3	2	2
FALSE	High	Master Protein	A0A088ADI9	KH domain-containing protein OS=Apis mellifera OX=7460 PE=4 SV=1	0	FALSE		5.515	9	2	5	2	321	35.1	7.23	0				0	1.74						1.69		0				1				1	1						1		1
FALSE	High	Master Protein	A0A087ZVJ6	KH domain-containing protein OS=Apis mellifera OX=7460 PE=4 SV=1	0	FALSE		9.279	20	3	3	3	143	15.3	7.99													2.01																	3
FALSE	High	Master Protein	A0A087ZVJ7	KH domain-containing protein OS=Apis mellifera OX=7460 PE=4 SV=1	0	FALSE		9.241	19	3	7	3	303	30	9.01	2.48				1.63	0			0			1.77		0				1				1	1			1			2		1
FALSE	High	Master Protein	A0A088AV85	KH type-2 domain-containing protein OS=Apis mellifera OX=7460 GN=RpS3 PE=4 SV=1	0	FALSE		87.051	71	16	181	16	242	26.8	9.66	20.7		51.02	1.67	50.63	37.48	1.64	0	49.23	6.46	0	28.18	15.83	31.65	59.84	10.46	0	11		12	3	12	12	1	1	14	4	2	10	8	5	13	8	3
FALSE	High	Master Protein	A0A088A7G3	Kinesin-like protein OS=Apis mellifera OX=7460 PE=3 SV=1	0	FALSE		46.656	12	9	18	9	969	110.3	6.18				0		7.09			10.56			0		0	14.95						1		3			6			2		1	5
FALSE	High	Master Protein	A0A088AV41	KOW domain-containing protein OS=Apis mellifera OX=7460 GN=mRpL24 PE=3 SV=1	0	FALSE		5.145	8	2	3	2	253	30.1	9.79						0			0						2.34								1			1						1
FALSE	High	Master Protein	A0A088AEV2	KOW domain-containing protein OS=Apis mellifera OX=7460 GN=RpL26 PE=4 SV=1	0	FALSE		22.07	35	6	38	6	148	17.4	10.86	1.73		8.56	1.88	2.24	6.34			6.89	0		2.66	4.57		10.08	3.88	0	1		3	3	1	4			4	1		2	4		4	2	1
FALSE	High	Master Protein	A0A088AVX5	L51_S25_CI-B8 domain-containing protein OS=Apis mellifera OX=7460 GN=LOC727049 PE=4 SV=1	0	FALSE		26.908	63	6	56	6	94	11	9.45	9.43		6.04	10.4	4.04	15.92	3.73		4.91	1.81		9.31	1.96	6.68	12.85	2.16		3		3	4	2	6	5		2	2		5	2	2	4	2
FALSE	High	Master Protein	A0A088AGJ0	L51_S25_CI-B8 domain-containing protein OS=Apis mellifera OX=7460 GN=mRpL43 PE=4 SV=1	0.001	FALSE		3.758	6	1	4	1	191	22.5	8.73			0		0				1.83											1		1				1
FALSE	High	Master Protein	A0A087ZV44	L51_S25_CI-B8 domain-containing protein OS=Apis mellifera OX=7460 GN=mRpS25 PE=4 SV=1	0	FALSE		7.882	15	2	2	2	169	19.5	9					0										2.99							1										1
FALSE	High	Master Protein	A0A088ALN9	Lactoylglutathione lyase OS=Apis mellifera OX=7460 PE=3 SV=1	0	FALSE		15.267	36	5	22	5	183	21.1	5.64	4.65					2.75		6.95		2.31	2.24	2.68		2.46		3.02	0	3					3		5		1	2	2		1		2	1
FALSE	High	Master Protein	A0A088AFH0	LAM_G_DOMAIN domain-containing protein OS=Apis mellifera OX=7460 PE=4 SV=1	0	FALSE		9.066	3	3	4	3	1428	159.6	4.82	0							1.61										1							2
FALSE	High	Master Protein	A0A088ALQ6	Laminin N-terminal domain-containing protein OS=Apis mellifera OX=7460 PE=4 SV=1	0	FALSE		16.943	18	1	6	1	117	12.9	5.08			5.16			11.42			4.11						4.71					1			1			1						1
FALSE	High	Master Protein	A0A088A0L8	LEM domain-containing protein OS=Apis mellifera OX=7460 PE=4 SV=1	0	FALSE		56.852	25	13	38	13	788	89.3	8.32	1.92		3.22		2.33	9.33			15.74			2.08	6.25	2.68	9.89	0		2		3		2	4			7			2	6	2	3	2
FALSE	High	Master Protein	A0A088AAR0	Letm1 RBD domain-containing protein OS=Apis mellifera OX=7460 GN=LOC727277 PE=4 SV=1	0	FALSE		6.094	10	2	2	2	346	41.6	9.98					0				0													1				1
FALSE	High	Master Protein	A0A087ZUY2	Leucine carboxyl methyltransferase 1 OS=Apis mellifera OX=7460 GN=LOC409320 PE=3 SV=1	0	FALSE		5.084	9	2	2	2	316	36.2	5.57	0					2.15												1					1
FALSE	High	Master Protein	A0A087ZXA2	Lipase domain-containing protein OS=Apis mellifera OX=7460 GN=LOC551268 PE=3 SV=1	0.008	FALSE		3.081	3	1	2	1	303	33.6	6.87							1.93										1.94							1										1
FALSE	High	Master Protein	A0A087ZXA0	Lipase domain-containing protein OS=Apis mellifera OX=7460 GN=LOC727193 PE=3 SV=1	0.006	FALSE		3.323	4	1	1	1	304	34.1	6.79	2.28																	1
FALSE	High	Master Protein	A0A088AQK3	Lipase domain-containing protein OS=Apis mellifera OX=7460 PE=3 SV=1	0.007	FALSE		3.135	5	1	1	1	359	39.9	6.6										0																	1
FALSE	High	Master Protein	A0A088A3D4	Lipase domain-containing protein OS=Apis mellifera OX=7460 PE=3 SV=1	0.001	FALSE		3.849	6	1	1	1	362	40.1	5.49	0																	1
FALSE	High	Master Protein	A0A088AN52	Lipase maturation factor OS=Apis mellifera OX=7460 GN=LOC724741 PE=3 SV=1	0	FALSE		25.022	10	4	12	4	648	75.6	9.26	2.65		3.39		2.93	2.13			9.66					0	7.97			1		1		2	1			2					1	2
FALSE	High	Master Protein	A0A088A4U1	Lipase_3 domain-containing protein OS=Apis mellifera OX=7460 GN=LOC726798 PE=4 SV=1	0	FALSE		79.781	23	12	56	12	669	76.7	9.07			32.29		7.93	14.6			14.53			0	7	2.14	19.36	3.62	0			9		4	6			3			1	3	2	6	4	2
FALSE	High	Master Protein	A0A087ZUF6	Lipase_GDSL domain-containing protein OS=Apis mellifera OX=7460 GN=725668 PE=4 SV=1	0	FALSE		4.486	5	2	2	2	414	46.5	9.47			1.72																	2
FALSE	High	Master Protein	A0A087ZUF5	Lipase_GDSL domain-containing protein OS=Apis mellifera OX=7460 GN=LOC411706 PE=4 SV=1	0	FALSE		7.87	6	2	3	2	421	48.3	8.53					4.53																	2
FALSE	High	Master Protein	A0A087ZUG0	Lipase_GDSL domain-containing protein OS=Apis mellifera OX=7460 GN=LOC551805 PE=4 SV=1	0	FALSE		12.671	8	3	5	3	405	46.5	8.19	9.77																	3
FALSE	High	Master Protein	A0A088AAT3	Lipase_GDSL domain-containing protein OS=Apis mellifera OX=7460 PE=4 SV=1	0	FALSE		11.237	8	3	4	3	407	46.7	8.25			2.14													2.34	1.72			1													1	2
FALSE	High	Master Protein	A0A088AHA7	Lipocln_cytosolic_FA-bd_dom domain-containing protein OS=Apis mellifera OX=7460 PE=3 SV=1	0	FALSE		8.342	17	2	4	2	174	19.6	5.63	1.77							4.95										1							2
FALSE	High	Master Protein	A0A088A4R2	Lipocln_cytosolic_FA-bd_dom domain-containing protein OS=Apis mellifera OX=7460 PE=3 SV=1	0	FALSE		25.315	26	6	35	6	296	33.2	7.53	1.9	5.94	9.57	0	8.43	7.42	3.6	0		7.04	0			2.23		0		3	4	2	1	2	2	2	1		4	2			1		1
FALSE	High	Master Protein	Q38RA5	Lipophorin receptor (Fragment) OS=Apis mellifera OX=7460 PE=2 SV=1	0	FALSE		4.268	10	1	1	1	128	13.6	6.02	2.09																	1
FALSE	High	Master Protein	A0A1Q4NW26	Lipoprotein OS=Serratia marcescens OX=615 GN=metQ PE=3 SV=1	0	FALSE	Bacteria	4.124	6	1	2	1	271	29.3	6.24								3.37																	1
FALSE	High	Master Protein	A0A221HCY8	Lipoprotein OS=Serratia marcescens OX=615 GN=metQ PE=3 SV=1	0	FALSE	Bacteria	10.026	13	2	4	2	271	29.4	5.4								3.96																	2
FALSE	High	Master Protein	A0A087ZZR9	Lipoyl-binding domain-containing protein OS=Apis mellifera OX=7460 GN=LOC409155 PE=4 SV=1	0	FALSE		105.682	25	10	145	10	514	55.6	9.11	26.7		15	24.34	63.38	24.67	6.45		51.46	7.66		26.66	9.71	37.79	31.54	4.72	0	7		4	8	9	6	6		7	4		6	4	7	6	3	1
FALSE	High	Master Protein	A0A088A9S3	L-lactate dehydrogenase OS=Apis mellifera OX=7460 PE=3 SV=1	0	FALSE		40.18	22	8	30	8	463	51.6	9.17			9.33	0		10.71					0	6.98	9.64		2.77	17.64				3	1		3					1	3	4		1	8
FALSE	High	Master Protein	A0A088A462	Lon protease homolog, mitochondrial OS=Apis mellifera OX=7460 GN=LOC409459 PE=3 SV=1	0	FALSE		125.978	32	22	72	22	1012	114.7	8.4	14.19		0	0	2.24	7.39			33.58		5.7	9.31	0	17.01	53.32			6		1	1	2	4			11		5	3	2	6	14
FALSE	High	Master Protein	A0A088AI22	LRRCT domain-containing protein OS=Apis mellifera OX=7460 PE=4 SV=1	0	FALSE		6.771	3	2	3	2	691	76	5.05									1.74						3.92											1						2
FALSE	High	Master Protein	A0A088AEZ9	L-type lectin-like domain-containing protein OS=Apis mellifera OX=7460 GN=Lman2 PE=4 SV=1	0	FALSE		35.108	35	8	17	8	324	37.1	6.73	0				4.81				9.43	0			2.07		11.62	2.23		1				2				4	1			2		3	2
FALSE	High	Master Protein	A0A088AEI5	L-type lectin-like domain-containing protein OS=Apis mellifera OX=7460 GN=LOC550798 PE=4 SV=1	0	FALSE		66.932	27	9	18	9	504	57.8	6.38	2.57		5.27	0	7.33	2.24			3.5				1.78		24.93			1		1	1	3	1			2				1		7
FALSE	High	Master Protein	A0A088AHQ9	Lyase_1 domain-containing protein OS=Apis mellifera OX=7460 PE=3 SV=1	0	FALSE		93.399	44	13	113	13	439	47.7	7.77	51.19		14.41	0	6.65	9.06		4.38	28.36		30.12	8.06	15.7	19.17	6.31	12.56		8		5	1	3	4		6	8		11	4	6	7	2	6
FALSE	High	Master Protein	R4TRB9	LYS1 (Fragment) OS=Apis mellifera OX=7460 GN=lys1 PE=3 SV=1	0	FALSE		8.741	22	2	3	2	156	17.8	8.4								4.22																	2
FALSE	High	Master Protein	A0A088A601	LysM domain-containing protein OS=Apis mellifera OX=7460 PE=4 SV=1	0	FALSE		8.602	3	2	2	2	1255	140.3	5.4															2.16	0																1	1
FALSE	High	Master Protein	A0A088ADU9	M20_dimer domain-containing protein OS=Apis mellifera OX=7460 GN=LOC412393 PE=4 SV=1	0	FALSE		65.022	33	13	44	13	481	54.2	6.43	14.14			0		0		11.16	5.08		0	1.85	5.57	12.09	6.88	8.05		4			1		1		7	2		3	1	5	5	2	6
FALSE	High	Master Protein	A0A088AU96	Macro domain-containing protein OS=Apis mellifera OX=7460 GN=LOC408589 PE=4 SV=1	0	FALSE		32.723	30	6	37	6	270	30.4	8.75	5					9.79	0	1.75	2.14		2.24	14.71	8.33	0	2.04	0		4					4	1	2	1		5	5	2	1	1	2
FALSE	High	Master Protein	O18330	Major royal jelly protein 1 OS=Apis mellifera OX=7460 GN=MRJP1 PE=1 SV=1	0	FALSE		39.014	20	7	13	7	432	48.9	5.34				13.58	11.54						1.84										5	5						2
FALSE	High	Master Protein	B3GM11	Major royal jelly protein 8 OS=Apis mellifera OX=7460 GN=MRJP8 PE=2 SV=1	0.006	FALSE		3.332	3	1	1	1	415	46.9	6.98																0																	1
FALSE	High	Master Protein	B3GM12	Major royal jelly protein 9 OS=Apis mellifera OX=7460 GN=MRJP9 PE=2 SV=1	0	FALSE		30.683	28	10	26	9	422	48.5	8.53	0			5.07			0			1.65	1.83					14.85	14.83	2			2			1			1	1					6	8
FALSE	High	Master Protein	U5J977	Malate dehydrogenase (Fragment) OS=Pectobacterium carotovorum subsp. carotovorum OX=555 GN=mdh PE=3 SV=1	0	FALSE	Bacteria	23.552	38	5	16	1	146	15.2	7.14								19.87			4.47					0									5			1					1
FALSE	High	Master Protein	A0A087ZUK9	Malate dehydrogenase OS=Apis mellifera OX=7460 GN=LOC408950 PE=3 SV=1	0	FALSE		131.01	70	17	287	17	338	35.8	9.29	86.69		33.59	24.3	37.57	85.07	15.43	37.99	38.22	12	48.38	74.79	15.13	80.74		32.69	8.07	15		10	11	11	15	5	14	10	7	14	15	5	11		6	7
FALSE	High	Master Protein	A0A087ZYQ1	Malate dehydrogenase OS=Apis mellifera OX=7460 GN=LOC411014 PE=3 SV=1	0	FALSE		91.941	53	15	126	15	333	36.1	6.71	13.37		17.61	19.66	2.02	35.07	4.6	21.59	21.83	13.49	6.8	34.27	4	19.21	2.5	22.19	3.97	5		4	6	2	9	4	10	7	5	7	9	3	7	1	10	2
FALSE	High	Master Protein	A0A086FJ79	Malate dehydrogenase OS=Serratia marcescens OX=615 GN=mdh PE=3 SV=1	0	FALSE	Bacteria	56.597	44	8	26	4	312	32.6	6.57								32.98			4.39					0									8			3					2
FALSE	High	Master Protein	A0A088AES7	Malic enzyme OS=Apis mellifera OX=7460 GN=Mdh PE=3 SV=1	0	FALSE		8.987	5	2	2	2	625	69.7	7.64														2.94																	2
FALSE	High	Master Protein	A0A088ATR6	Malic enzyme OS=Apis mellifera OX=7460 PE=3 SV=1	0	FALSE		40.303	28	12	17	12	632	70.7	7.11	6.41								0		0		4.2		0	5.34		4								1		2		3		1	6
FALSE	High	Master Protein	A0A087ZXG9	MARVEL domain-containing protein OS=Apis mellifera OX=7460 GN=100577682 PE=4 SV=1	0	FALSE		17.864	29	2	7	2	168	19.2	9.17			3.4		5.26				2.56						6.66	0				1		1				1						1	1
FALSE	High	Master Protein	A0A088ASR9	MARVEL domain-containing protein OS=Apis mellifera OX=7460 GN=LOC726696 PE=4 SV=1	0	FALSE		6.599	19	1	5	1	161	17.8	8.6														2.64	6.56	0	0														1	1	1	1
FALSE	High	Master Protein	A0A087ZPM2	Mast cell degranulating peptide OS=Apis mellifera OX=7460 GN=Mcdp PE=4 SV=1	0	FALSE		10.249	20	2	139	2	50	5.8	9.77	0	0		6.36	0	5.1	0	0	0	0	0	0	0			1.9	0	1	1		2	1	1	1	1	1	1	1	1	1			1	1
FALSE	High	Master Protein	A0A088AFE8	Matrin-type domain-containing protein OS=Apis mellifera OX=7460 GN=SF3A3 PE=4 SV=1	0	FALSE		4.15	4	1	3	1	501	58.3	5.41			0		0				0											1		1				1
FALSE	High	Master Protein	A0A088A676	Maxi-like antifreeze protein OS=Apis mellifera OX=7460 GN=102654146 PE=2 SV=1	0	FALSE		282.725	90	15	196	15	364	37	6.64	785.37						9.81								8.82			15						6								2
FALSE	High	Master Protein	A0A088AW52	MCU domain-containing protein OS=Apis mellifera OX=7460 PE=4 SV=1	0	FALSE		10.389	8	2	7	2	339	39.2	7.01					5.16	0			3.03			0			0							1	1			1			1			1
FALSE	High	Master Protein	P01501	Melittin OS=Apis mellifera OX=7460 GN=MELT PE=1 SV=1	0	FALSE		89.285	23	3	1578	3	70	7.6	4.72	58.56	82.84	7.61	679.61	490.23	85.51	564.79	28.73	143.62	293.97	708.52	25.45	55.26		8.24	114.37	72.4	2	2	2	3	3	2	3	2	2	3	3	2	2		1	3	2
FALSE	High	Master Protein	P0DPR9	Melittin-N OS=Apis cerana OX=7461 GN=MELT PE=1 SV=1	0	FALSE		63.908	23	3	165	3	70	7.6	4.72	19.06			67.74	0	80.42	0	15.07			22.99		0			174.81	9.35	2			2	1	2	1	2			2		1			3	2
FALSE	High	Master Protein	A0A093VDD5	Membrane protein OS=Pectobacterium carotovorum subsp. carotovorum OX=555 GN=KP17_00765 PE=3 SV=1	0	FALSE	Bacteria	29.518	17	7	27	4	366	39	8.53	5.59							31.72			9.67				3.1	2.13		2							5			3				1	3
FALSE	High	Master Protein	A0A093VEE9	Membrane protein OS=Pectobacterium carotovorum subsp. carotovorum OX=555 GN=KP17_02700 PE=4 SV=1	0.008	FALSE	Bacteria	3.07	6	1	3	1	155	15.5	9.72								2.45			0														1			1
FALSE	High	Master Protein	A0A088AII8	Methionine aminopeptidase 2 OS=Apis mellifera OX=7460 GN=Metap2 PE=3 SV=1	0.005	FALSE		3.655	2	1	1	1	474	52.5	5.99																2.03																	1
FALSE	High	Master Protein	A0A0P0QCU8	Methyl-galactoside ABC transporter substrate-binding protein OS=Serratia marcescens OX=615 GN=AR325_10035 PE=4 SV=1	0.001	FALSE	Bacteria	3.774	3	1	1	1	330	35.7	6.6								1.79																	1
FALSE	High	Master Protein	A0A087ZS22	MFS domain-containing protein OS=Apis mellifera OX=7460 GN=LOC408478 PE=3 SV=1	0	FALSE		4.451	2	1	1	1	545	60.7	9.22															3.01																	1
FALSE	High	Master Protein	A0A088A6U6	MFS domain-containing protein OS=Apis mellifera OX=7460 GN=LOC410920 PE=4 SV=1	0	FALSE		4.054	2	1	3	1	508	56.2	8.21					1.92	2.62									0							1	1									1
FALSE	High	Master Protein	A0A088A8N0	MFS domain-containing protein OS=Apis mellifera OX=7460 GN=LOC724874 PE=3 SV=1	0	FALSE		21.505	11	4	10	4	514	57.9	8.72	8.15							6.23			4.13					0		3							2			1					2
FALSE	High	Master Protein	A0A088AUA9	MFS domain-containing protein OS=Apis mellifera OX=7460 PE=3 SV=1	0	FALSE		16.781	7	3	9	3	521	57.6	8.28	3.13		2.61			2.51			2.33	6.88			2.38		2.25			1		1			1			1	2			1		1
FALSE	High	Master Protein	A0A087ZQD7	MFS domain-containing protein OS=Apis mellifera OX=7460 PE=3 SV=1	0	FALSE		4.407	1	1	2	1	784	87.1	7.34			2.4																	1
FALSE	High	Master Protein	A0A087ZWQ0	MFS domain-containing protein OS=Apis mellifera OX=7460 PE=4 SV=1	0	FALSE		8.123	5	2	2	2	673	73.9	5.16				2.56																	2
FALSE	High	Master Protein	A0A088A5U8	MFS domain-containing protein OS=Apis mellifera OX=7460 PE=4 SV=1	0	FALSE		9.17	4	2	2	2	798	86.5	5.78									0						0											1						1
FALSE	High	Master Protein	A0A088A4M6	MFS_1_like domain-containing protein OS=Apis mellifera OX=7460 GN=LOC410041 PE=4 SV=1	0	FALSE		15.567	5	3	7	3	710	79.3	6.83			3.33		3	2.69			3.29				3.75		2.36					1		1	1			1				2		1
FALSE	High	Master Protein	A0A088A9E6	MHD domain-containing protein OS=Apis mellifera OX=7460 GN=AP-50 PE=3 SV=1	0	FALSE		6.849	7	3	4	3	442	49.9	9.45					0								1.67									1								3
FALSE	High	Master Protein	A0A088A8Q1	MICOS complex subunit MIC10 OS=Apis mellifera OX=7460 GN=LOC726902 PE=3 SV=1	0	FALSE		8.508	31	1	1	1	87	9.9	8.68									3.01																	1
FALSE	High	Master Protein	A0A088AG05	MICOS complex subunit MIC13 OS=Apis mellifera OX=7460 GN=725253 PE=3 SV=1	0	FALSE		26.149	61	4	35	4	114	12.9	9.28	2.48		14.56	3.67	12.27	9.98	5.84		3.98			4.4			2.5			2		3	2	4	4	3		2			2			1
FALSE	High	Master Protein	A0A088ASI2	MICOS complex subunit MIC60 OS=Apis mellifera OX=7460 GN=LOC408548 PE=3 SV=1	0	FALSE		216.151	54	35	186	35	752	86.1	7.78	14.45		37.98	6.91	55.77	41.11	1.68		60.11			18.66	17.45	40.62	92.28	7.38		5		11	6	18	14	4		18			10	12	12	19	4
FALSE	High	Master Protein	A0A088A8C1	MICOS complex subunit OS=Apis mellifera OX=7460 GN=LOC552009 PE=4 SV=1	0	FALSE		76.968	47	8	111	8	245	27.5	8.38	4.44		25.68	12.3	44.95	35.58	3.54		48.61			18.04	16.95	28.23	28.34	1.62		2		6	3	7	7	4		8			5	5	6	6	2
FALSE	High	Master Protein	A0A088AIN2	Microtubule-associated protein OS=Apis mellifera OX=7460 PE=4 SV=1	0.01	FALSE		2.53	4	1	2	1	290	31.2	9.95	1.95			0														1			1
FALSE	High	Master Protein	A0A088A4V0	Mitochondrial fission 1 protein OS=Apis mellifera OX=7460 GN=LOC551255 PE=3 SV=1	0	FALSE		17.167	33	4	17	4	150	17.1	7.84			7.87	6.83	2.64	5.07						2.39		0		0				2	4	1	2						1		1		1
FALSE	High	Master Protein	A0A088A218	Mitochondrial import inner membrane translocase subunit TIM44 OS=Apis mellifera OX=7460 GN=LOC412409 PE=3 SV=1	0	FALSE		43.088	24	9	32	9	456	52.2	8.44	6.18		2.9		2.07	13.07			7.72		4.1	13.05		4.59	5.94			2		1		1	4			2		7	4		3	3
FALSE	High	Master Protein	A0A088AJ70	Mitochondrial import inner membrane translocase subunit TIM50 OS=Apis mellifera OX=7460 GN=LOC408569 PE=3 SV=1	0	FALSE		12.162	12	3	9	3	387	45.5	6.81				0					3.27			2.47	2.23	2.09	4.87	0					1					1			1	2	1	2	1
FALSE	High	Master Protein	A0A088AN56	Mitochondrial pyruvate carrier OS=Apis mellifera OX=7460 GN=LOC411677 PE=3 SV=1	0	FALSE		9.52	47	2	2	2	103	12.1	9.8					2.12				0													1				1
FALSE	High	Master Protein	A0A088ALK3	Mitochondrial pyruvate carrier OS=Apis mellifera OX=7460 GN=LOC413186 PE=3 SV=1	0	FALSE		5.128	10	1	2	1	125	13.9	10.23					2.02								1.65									1								1
FALSE	High	Master Protein	A0A087ZYD6	Mitogen-activated protein kinase OS=Apis mellifera OX=7460 PE=4 SV=1	0	FALSE		4.82	5	1	1	1	388	44.5	6.06			3.14																	1
FALSE	High	Master Protein	A0A087ZRW9	ML domain-containing protein OS=Apis mellifera OX=7460 GN=LOC409187 PE=4 SV=1	0	FALSE		8.863	27	2	13	2	159	18.5	7.59	0				0			4.39		0						0	3.86	1				1			1		2						1	1
FALSE	High	Master Protein	A0A087ZVK5	ML domain-containing protein OS=Apis mellifera OX=7460 GN=LOC551922 PE=4 SV=1	0	FALSE		29.171	49	5	24	5	152	17	6.73	6.32			0		0		11.52		2.42	0						0	3			1		1		3		3	2						1
FALSE	High	Master Protein	A0A087ZTA5	ML domain-containing protein OS=Apis mellifera OX=7460 GN=LOC724386 PE=4 SV=1	0	FALSE		68.595	61	5	95	5	148	16.1	7.62	2.79		7.09			0	0	64.07			47.25	10.11			2.58	19.48	30.52	2		2			1	1	4			4	3			1	3	5
FALSE	High	Master Protein	A0A088A045	ML domain-containing protein OS=Apis mellifera OX=7460 PE=4 SV=1	0	FALSE		27.088	47	5	59	5	154	16.8	6.51	17.56	6.65		0	5.47	0		7.12	0	5.49	0	1.28	3.48	0		5.5	3.66	4	3		1	3	2		4	1	3	1	3	2	1		3	3
FALSE	High	Master Protein	A0A1Q5W437	Molecular chaperone OsmY OS=Serratia marcescens OX=615 GN=A8A12_13755 PE=4 SV=1	0.001	FALSE	Bacteria	3.77	5	1	3	1	204	21.2	8.21								3.76			0														1			1
FALSE	High	Master Protein	A0A088AV56	MOSC domain-containing protein OS=Apis mellifera OX=7460 GN=LOC724919 PE=4 SV=1	0	FALSE		11.207	10	3	5	3	343	38.8	9.19				0					1.93	3.24					1.93						1					1	2					1
FALSE	High	Master Protein	A0A0B4J2N7	MPN domain-containing protein OS=Apis mellifera OX=7460 GN=CSN5 PE=4 SV=1	0	FALSE		4.365	4	1	1	1	344	38.7	6.06									0																	1
FALSE	High	Master Protein	A0A088AGS6	MPN domain-containing protein OS=Apis mellifera OX=7460 GN=LOC408413 PE=4 SV=1	0	FALSE		71.393	43	8	35	8	320	36.4	6.48	3.45		2.24		12.3	7.33			26.09	0		6.77	2.02	14.35	16.11	7.49		1		1		3	3			5	1		2	1	2	3	2
FALSE	High	Master Protein	A0A088A3I1	MPN domain-containing protein OS=Apis mellifera OX=7460 GN=LOC551620 PE=4 SV=1	0	FALSE		8.3	2	2	2	2	2374	277	8.88			2.15						0											1						1
FALSE	High	Master Protein	A0A088ATF1	MPN domain-containing protein OS=Apis mellifera OX=7460 GN=LOC552372 PE=4 SV=1	0	FALSE		7.174	24	3	3	3	207	23.5	6.15			0		2.52															1		2
FALSE	High	Master Protein	A0A087ZR05	MPN domain-containing protein OS=Apis mellifera OX=7460 GN=Rpn11 PE=4 SV=1	0	FALSE		46.472	48	8	34	8	311	34.6	6.29	4.8		7.1		13.06	7.03			13.88			5.53	0	7.9	6.98	2.37		2		3		5	4			6			4	1	3	2	2
FALSE	High	Master Protein	A0A088A8N1	MRP-S23 domain-containing protein OS=Apis mellifera OX=7460 PE=4 SV=1	0	FALSE		5.866	12	1	1	1	144	17.2	9.22					3.12																	1
FALSE	High	Master Protein	A0A088A3M3	MRP-S28 domain-containing protein OS=Apis mellifera OX=7460 GN=mRpS35 PE=4 SV=1	0	FALSE		9.691	8	2	2	2	323	37.8	9.32									3.33						2.8											1						1
FALSE	High	Master Protein	A0A087ZQD5	MSP domain-containing protein OS=Apis mellifera OX=7460 GN=Vapa PE=4 SV=1	0	FALSE		93.139	47	12	155	12	249	28.1	7.84	7.31		18.59	13.84	35.6	18.36	1.95		42.13	0		13.16	36.54	34.98	63.68	11.39	0	4		6	5	8	7	2		8	1		4	10	7	10	6	2
FALSE	High	Master Protein	A0A088A1I8	Multifunctional fusion protein OS=Apis mellifera OX=7460 GN=LOC551113 PE=3 SV=1	0	FALSE		86.931	32	17	85	17	567	63.5	8.32	9.47		16.91		0	4.88		1.71	17.19		3.82	6.45	21.96	34.42	15.32	3.66		7		5		1	4		2	7		5	2	11	8	5	4
FALSE	High	Master Protein	A0A093RDD7	Murein lipoprotein OS=Pectobacterium carotovorum subsp. carotovorum OX=555 GN=KP17_02980 PE=4 SV=1	0	FALSE	Bacteria	14.196	33	2	21	1	78	8.4	9.31	6.53			7.5		3.26	0	11.85			5.74		2.27			5.34	0	1			1		1	1	1			1		1			2	1
FALSE	High	Master Protein	A0A080UXV1	Murein-lipoprotein OS=Serratia marcescens OX=615 GN=lpp PE=4 SV=1	0	FALSE	Bacteria	19.74	33	2	34	1	78	8.3	8.84	6.53			14.54		3.26	0	19.85			10.4		4.37			8.52	1.87	1			2		1	1	2			2		2			2	2
FALSE	High	Master Protein	A0A088AJT3	Myb_DNA-bind_5 domain-containing protein OS=Apis mellifera OX=7460 PE=4 SV=1	0	FALSE		17.646	8	2	16	2	439	50.8	8.29	2.16			0		3.61	0	0		0		2.27		10.19			0	1			1		1	1	2		1		1		2			1
FALSE	High	Master Protein	A0A088AJE3	Myosin motor domain-containing protein OS=Apis mellifera OX=7460 PE=3 SV=1	0	FALSE		2796.28	68	198	9946	198	1967	226.4	5.55	1560.81		2107.7	37.71	2780.79	2297.28	1176.62	40.9	3311.68	168.25	15.45	1579.12	3534.32	4064.93	6104.43	704.52	0	137		139	23	145	157	131	26	153	56	13	129	133	129	149	102	2
FALSE	High	Master Protein	A0A087ZW20	Myosin_tail_1 domain-containing protein OS=Apis mellifera OX=7460 PE=4 SV=1	0	FALSE		561.592	53	47	1301	47	639	74.5	7.23	244.95		197.11	0	390.2	330.05	279.47	3.68	430.81	55.84	8	311.04	559.31	502.8	600.5	160.76		25		26	2	31	33	26	3	38	16	7	32	30	30	36	28
FALSE	High	Master Protein	A0A088AVZ2	Myosin_tail_1 domain-containing protein OS=Apis mellifera OX=7460 PE=4 SV=1	0	FALSE		19.916	7	5	8	4	942	107.9	5.3					0	0			6.23					0	7.69							1	1			3					1	2
FALSE	High	Master Protein	A0A087ZW19	Myosin_tail_1 domain-containing protein OS=Apis mellifera OX=7460 PE=4 SV=1	0	FALSE		693.557	67	54	1799	54	541	63.5	5.36	351.51		279.07	0	512.66	390.22	386.04	0	636.16	74.66	0	374.01	803.34	683.75	548.22	237.38		36		32	1	39	38	40	2	43	20	2	40	35	41	41	36
FALSE	High	Master Protein	A0A088AUC4	NAC-A/B domain-containing protein OS=Apis mellifera OX=7460 GN=LOC551157 PE=4 SV=1	0	FALSE		29.257	27	4	18	4	214	22.7	4.81	8.86		1.95		4.9	4.01			8.28		5.79	7.19	1.62					3		1		2	2			3		3	3	1
FALSE	High	Master Protein	A0A088AHR1	N-acetyltransferase domain-containing protein OS=Apis mellifera OX=7460 PE=4 SV=1	0	FALSE		10.89	18	4	9	4	262	29.8	5.76	7.1			5.63							1.71							4			2							1
FALSE	High	Master Protein	A0A088A0I0	NAD(P)-bd_dom domain-containing protein OS=Apis mellifera OX=7460 GN=LOC412445 PE=4 SV=1	0	FALSE		40.345	49	7	33	7	201	22.2	8.25	11.31		8.7			3.55		0	8.61	0	13.34	9.83		0	3.32	2.15		4		3			1		3	3	2	3	3		1	1	3
FALSE	High	Master Protein	A0A088A9V8	NAD(P)-bd_dom domain-containing protein OS=Apis mellifera OX=7460 PE=3 SV=1	0	FALSE		9.675	12	3	3	3	356	40.3	6.86									0		0															1		2
FALSE	High	Master Protein	A0A0A5LSR2	NAD(P)H dehydrogenase (quinone) OS=Serratia marcescens OX=615 GN=wrbA_2 PE=3 SV=1	0	FALSE	Bacteria	9.738	19	3	5	3	199	21.1	7.21								7.47																	3
FALSE	High	Master Protein	A0A087ZRH1	NAD_Gly3P_dh_N domain-containing protein OS=Apis mellifera OX=7460 PE=4 SV=1	0	FALSE		14.727	54	3	17	3	78	8.8	9.16	2.64					2.73		4.97			2.22	3.01				3.01	0	1					1		3			3	2				1	1
FALSE	High	Master Protein	A0A087ZP22	NADH dehydrogenase [ubiquinone] 1 alpha subcomplex subunit 10, mitochondrial OS=Apis mellifera OX=7460 GN=Ndufa10 PE=3 SV=1	0	FALSE		133.195	66	24	138	24	415	49.2	7.11	4.73		27.35	5.81	38.05	24.51	5.02		63.49	0		16.27	15.62	18.45	52.34	1.62		3		8	5	12	10	3		18	1		9	9	7	12	1
FALSE	High	Master Protein	A0A087ZQU2	NADH dehydrogenase [ubiquinone] 1 alpha subcomplex subunit 8 OS=Apis mellifera OX=7460 GN=Ndufa8 PE=3 SV=1	0	FALSE		22.842	33	5	33	5	174	20.2	8.05			0	4.61	13.46	5.17	2.27		5.19			4.44	2.32	6.95	2.91					1	2	4	4	3		3			4	1	2	1
FALSE	High	Master Protein	A0A088A1P8	NADH dehydrogenase [ubiquinone] flavoprotein 1, mitochondrial OS=Apis mellifera OX=7460 PE=3 SV=1	0	FALSE		106.095	61	17	113	17	469	51.5	8.34	6.67		21.48	18.53	36.22	32.86	7.2		33.56	0	0	13.07	10.98	10.28	34.94	0		3		7	7	9	11	4		10	3	2	7	6	4	5	1
FALSE	High	Master Protein	Q85SY9	NADH dehydrogenase subunit 2 (Fragment) OS=Apis mellifera pomonella OX=216129 GN=ND2 PE=4 SV=1	0.006	FALSE		3.284	6	1	1	1	208	25.2	9.5					0																	1
FALSE	High	Master Protein	A0A1X9WE15	NADH dehydrogenase subunit 6 OS=Apis mellifera meda OX=346612 GN=ND6 PE=4 SV=1	0	FALSE		5.875	13	2	5	2	167	20	9.76					2.43				4.01			0										2				1			1
FALSE	High	Master Protein	A0A088AB11	NADH-cytochrome b5 reductase OS=Apis mellifera OX=7460 GN=LOC413189 PE=3 SV=1	0	FALSE		133.001	69	19	194	19	308	34.6	8.9	2.49		38.49	7.06	57.68	36.93	4.18		78.64	0		34.68	33.12	21.28	55.09	7.64	0	4		10	10	10	11	6		12	1		10	11	6	11	7	1
FALSE	High	Master Protein	A0A060B9T4	NADH-ubiquinone oxidoreductase chain 1 OS=Apis mellifera scutellata OX=212527 GN=ND1 PE=3 SV=1	0	FALSE		7.802	5	1	8	1	305	36.7	6.54	1.63		4.12		4.74	0			0									1		1		1	1			1
FALSE	High	Master Protein	A0A0B5HAU7	NADH-ubiquinone oxidoreductase chain 3 OS=Apis mellifera syriaca OX=279977 GN=ND3 PE=3 SV=1	0	FALSE		8.733	11	1	11	1	117	14	8.1	0		4.65		2.56	2.58	0		4.34	0				2.26				1		1		1	1	1		1	1				1
FALSE	High	Master Protein	A0A088AJJ2	NADPH--cytochrome P450 reductase OS=Apis mellifera OX=7460 PE=4 SV=1	0	FALSE		117.22	48	19	116	19	523	60.3	7.05	2.54		10.88	1.74	19.89	28.08			50.04				13.53	45.61	67.84	9.97	0	2		5	2	6	13			15				5	10	13	9	2
FALSE	High	Master Protein	V5T6Q6	NADPH-dependent FMN reductase OS=Lactobacillus kimbladii OX=1218506 GN=JF75_02910 PE=4 SV=1	0	FALSE		10.291	19	3	4	3	182	20	5.15	2.36							0										1							3
FALSE	High	Master Protein	A0A088A2E5	Nfu_N domain-containing protein OS=Apis mellifera OX=7460 GN=LOC412366 PE=4 SV=1	0	FALSE		10.201	13	2	3	2	275	31.2	5.44												0		2.19		0													1		1		1
FALSE	High	Master Protein	A0A087ZYD4	Nicalin OS=Apis mellifera OX=7460 GN=Ncln PE=3 SV=1	0	FALSE		11.458	6	3	4	3	555	62	6.65			2.51						2.22						2.88					1						1						2
FALSE	High	Master Protein	A0A087ZZZ5	Nop domain-containing protein OS=Apis mellifera OX=7460 GN=LOC413935 PE=4 SV=1	0	FALSE		44.39	27	9	13	9	578	65.2	8.13					0				7.63						12.83	0						1				3						5	1
FALSE	High	Master Protein	A0A088AQN0	Nop domain-containing protein OS=Apis mellifera OX=7460 PE=4 SV=1	0	FALSE		28.549	19	5	9	5	468	52.1	9.36						2.2			5.86					0	8.66	0							1			2					1	3	1
FALSE	High	Master Protein	A0A088AC14	NRF domain-containing protein OS=Apis mellifera OX=7460 GN=LOC410736 PE=4 SV=1	0	FALSE		5.214	2	2	2	2	1738	198.9	5.17													0		2.02															1		1
FALSE	High	Master Protein	A0A088ACB7	NRF domain-containing protein OS=Apis mellifera OX=7460 GN=LOC411564 PE=4 SV=1	0	FALSE		110.802	25	18	162	18	711	82.4	8.19			53.59		32.4	22.8			48.27			12.77	7.5	43.74	87.16	43.3	11.82			10		9	6			9			5	4	5	10	7	7
FALSE	High	Master Protein	A0A088A092	NRF domain-containing protein OS=Apis mellifera OX=7460 PE=4 SV=1	0	FALSE		22.18	9	4	9	4	637	73.3	8.85			6		0				6.54					0	2.59					3		1				3					1	1
FALSE	High	Master Protein	A0A088A0Q7	Nsp1_C domain-containing protein OS=Apis mellifera OX=7460 PE=4 SV=1	0.009	FALSE		2.598	3	1	1	1	464	48.8	4.87														0																	1
FALSE	High	Master Protein	A0A088ACJ3	NTF2 domain-containing protein OS=Apis mellifera OX=7460 GN=LOC409406 PE=4 SV=1	0	FALSE		27.054	23	2	36	2	130	14.9	5.78	11.64		8.83	9.8	5.35	14.58		3.4	6	2.61	3.22	8.61	0			1.89		1		1	2	1	1		1	1	1	1	1	1			1
FALSE	High	Master Protein	A0A087ZXL9	NTP_transferase domain-containing protein OS=Apis mellifera OX=7460 GN=LOC413435 PE=4 SV=1	0	FALSE		25.431	17	6	13	6	420	46.3	8.22	0		1.93			7.64					0	0	2.26		4.79	1.9		1		1			3					1	1	1		1	2
FALSE	High	Master Protein	A0A088A202	NTP_transferase domain-containing protein OS=Apis mellifera OX=7460 PE=4 SV=1	0	FALSE		20.423	14	5	16	5	359	39.8	6.2	5.09					2.72					1.74		2.12	1.73	11.24	2.5		1					1					1		3	1	3	4
FALSE	High	Master Protein	A0A087ZPM5	NTR domain-containing protein OS=Apis mellifera OX=7460 GN=100576956 PE=4 SV=1	0	FALSE		4.935	5	1	1	1	222	26	9.38			1.98																	1
FALSE	High	Master Protein	A0A088A7R5	Nuclear pore complex protein OS=Apis mellifera OX=7460 GN=Nup107 PE=3 SV=1	0.008	FALSE		3.099	1	1	1	1	918	106.9	5.71															0																	1
FALSE	High	Master Protein	A0A088A1B8	Nuclear pore protein OS=Apis mellifera OX=7460 GN=LOC410343 PE=3 SV=1	0	FALSE		29.284	13	6	7	6	824	93.8	6.1			1.68						4.85						6.4	0				2						2						2	1
FALSE	High	Master Protein	A0A0G8B9E0	Nucleoid-associated protein A8A12_17490 OS=Serratia marcescens OX=615 GN=ybaB PE=3 SV=1	0	FALSE	Bacteria	4.314	12	1	1	1	109	12	5.07								1.81																	1
FALSE	High	Master Protein	A0A088A7S0	Nucleoplasmin domain-containing protein OS=Apis mellifera OX=7460 GN=102655896 PE=4 SV=1	0	FALSE		9.111	20	2	7	2	171	18.8	4.75	2.12			1.95				2.2						6.01		2.04	0	1			1				1						2		1	1
FALSE	High	Master Protein	A0A088ATV8	Nucleoside diphosphate kinase OS=Apis mellifera OX=7460 PE=3 SV=1	0	FALSE		46.481	71	9	75	9	154	17.6	7.33	12.02		2.47	19.09	8.02	11.53	0	8.09	9.02	0	2.08	7	2.52		7.79	2.74	0	5		2	7	4	3	1	7	2	1	4	4	1		3	4	4
FALSE	High	Master Protein	A0A088A6N0	Nudix hydrolase domain-containing protein OS=Apis mellifera OX=7460 GN=mRpL46 PE=4 SV=1	0.001	FALSE		3.829	4	1	3	1	269	31.1	8.59	0					0							2.86					1					1							1
FALSE	High	Master Protein	A0A088ASQ1	Obg-like ATPase 1 OS=Apis mellifera OX=7460 GN=LOC413266 PE=3 SV=1	0	FALSE		48.749	34	11	37	11	397	44.6	7.78	13.81		3.81			8.41		0	7.45	0	4.89	2.9	4.72	0	7.47	1.61		6		1			2		1	3	1	7	2	2	1	4	3
FALSE	High	Master Protein	A0A087ZSV5	OBG-type G domain-containing protein OS=Apis mellifera OX=7460 GN=LOC411280 PE=4 SV=1	0	FALSE		5.87	4	1	2	1	367	41	8.87											0				2.4													1				1
FALSE	High	Master Protein	Q1W641	OBP13 OS=Apis mellifera OX=7460 GN=Obp13 PE=2 SV=1	0	FALSE		53.086	48	7	48	7	132	15.1	6.61	12.58	1.95		4.49				42.94								9.97	22.35	4	1		2				7								3	6
FALSE	High	Master Protein	Q1W638	OBP16 OS=Apis mellifera OX=7460 GN=Obp16 PE=2 SV=1	0	FALSE		12.409	47	3	5	3	135	15.2	4.68																0	6.05																1	3
FALSE	High	Master Protein	Q1W637	OBP17 OS=Apis mellifera OX=7460 GN=Obp17 PE=2 SV=1	0	FALSE		25.699	56	6	35	6	135	15	4.68	5.24			0				8.15								9.02	10.02	3			5				6								5	5
FALSE	High	Master Protein	A0A088A4L3	OBP18 OS=Apis mellifera OX=7460 PE=4 SV=1	0	FALSE		81.521	54	9	113	8	149	16.4	4.84	50.96	0		7.8	0		0	36.73		2.58	0	2.04				19.02	69.98	8	2		3	1		1	7		4	1	1				5	9
FALSE	High	Master Protein	Q1W633	OBP21 OS=Apis mellifera OX=7460 GN=Obp21 PE=2 SV=1	0	FALSE		75.418	60	8	123	7	135	15.2	4.82	50.89	9.37		33.09			0	39.31		4.58	8.19	2.48				32.33	55.83	6	4		6			1	8		4	3	1				5	7
FALSE	High	Master Protein	Q1W647	OBP3 OS=Apis mellifera OX=7460 GN=Obp3 PE=2 SV=1	0	FALSE		9.998	21	2	4	2	152	17.7	4.86								1.62									0								2									1
FALSE	High	Master Protein	A0A088A3J5	OCIA domain-containing protein OS=Apis mellifera OX=7460 GN=asrij PE=4 SV=1	0	FALSE		15.389	26	3	9	3	233	27.2	5.12			5.72		0				2.88						3.07					2		1				2						1
FALSE	High	Master Protein	A0A088AW16	Oligosaccharyltransferase complex subunit OS=Apis mellifera OX=7460 PE=3 SV=1	0	FALSE		7.851	11	1	10	1	110	13	9.23	4.42		2.46	2.06	2.84				4.49	0		1.83						1		1	1	1				1	1		1
FALSE	High	Master Protein	H9KQJ7	Omega-conotoxin-like protein 1 OS=Apis mellifera OX=7460 PE=2 SV=1	0	FALSE		9.911	42	2	11	2	74	8.3	8.4	0			0				1.81									2.56	1			1				2									1
FALSE	High	Master Protein	P85832	Orcokinin peptides OS=Apis mellifera OX=7460 PE=1 SV=1	0	FALSE		6.293	14	1	1	1	147	16.6	5.91				2.88																	1
FALSE	High	Master Protein	P04845	Outer membrane protein A OS=Serratia marcescens OX=615 GN=ompA PE=3 SV=1	0	FALSE	Bacteria	17.761	20	6	17	3	359	38.4	8.25	2.58							12.38			3.59					2.13		1							4			2					3
FALSE	High	Master Protein	A0A088A9V1	Oxidored_q6 domain-containing protein OS=Apis mellifera OX=7460 GN=Ndufs7 PE=3 SV=1	0	FALSE		62	50	9	86	9	223	24.9	9.31	14.05		21.94	13.43	31.27	14.08	5.2		26.35	2.09		14.32	13.54	12.6	26.62	4.78		5		4	4	7	5	2		7	2		6	3	3	6	3
FALSE	High	Master Protein	A0A088A6G0	Oxysterol-binding protein OS=Apis mellifera OX=7460 PE=3 SV=1	0	FALSE		15.482	5	4	5	4	1034	116.3	7.4									0					1.78	3.79											1					2	2
FALSE	High	Master Protein	A0A088A4R3	PA2c domain-containing protein OS=Apis mellifera OX=7460 PE=3 SV=1	0	FALSE		9.778	20	3	11	3	230	25.6	7.5		4.02						2.42		0									2						3		3
FALSE	High	Master Protein	A0A088ATI3	PABS domain-containing protein OS=Apis mellifera OX=7460 GN=LOC410080 PE=4 SV=1	0	FALSE		44.93	29	8	28	8	366	41.2	5.07	2.6			2.87		2.77		1.86	2.85		9.3	5.6	2.96	4.65	7.41	17.62		1			2		1		1	2		4	2	1	2	2	6
FALSE	High	Master Protein	A0A088AEL4	PABS domain-containing protein OS=Apis mellifera OX=7460 GN=SpdS PE=3 SV=1	0	FALSE		5.165	9	2	3	2	293	32.6	6.16	0							0									0	1							1									1
FALSE	High	Master Protein	A0A088AST3	PCI domain-containing protein OS=Apis mellifera OX=7460 GN=LOC408397 PE=4 SV=1	0	FALSE		87.753	48	13	42	13	423	47.4	6.48	3.23		2.21		9.94	1.67			33.2			0	1.66	5.27	38.99	8.78		1		2		3	1			9			1	2	2	6	5
FALSE	High	Master Protein	A0A088AUX6	PCI domain-containing protein OS=Apis mellifera OX=7460 GN=LOC552319 PE=4 SV=1	0	FALSE		26.614	22	7	17	7	389	45.6	6.01	2.2								10.18				3.37	2.4	12.77			1								5				3	1	4
FALSE	High	Master Protein	A0A088A0Z2	PCI domain-containing protein OS=Apis mellifera OX=7460 GN=Rpn12 PE=4 SV=1	0	FALSE		22.496	24	4	11	4	266	30.4	5.07					9.76				6.76			0	0		12.1	2.59						2				1			1	1		2	1
FALSE	High	Master Protein	A0A088ASB8	PCI domain-containing protein OS=Apis mellifera OX=7460 GN=Rpn3 PE=4 SV=1	0	FALSE		53.488	24	10	19	10	495	56.9	8.28	0				2.19	0			11.26				1.8		13.93			1				3	1			6				2		2
FALSE	High	Master Protein	A0A088AP80	PCI domain-containing protein OS=Apis mellifera OX=7460 PE=4 SV=1	0	FALSE		7.588	7	2	3	2	477	54.4	7.01			0						0						2.37					1						1						1
FALSE	High	Master Protein	A0A088AM61	PCI domain-containing protein OS=Apis mellifera OX=7460 PE=4 SV=1	0	FALSE		70.221	34	11	43	11	455	52.2	6.98	4.8		3.18		8.48	3.45			29.15			4.98	2.36	6.79	23.3	4.29		3		2		5	1			8			2	2	1	8	4
FALSE	High	Master Protein	A0A088AD16	PCI domain-containing protein OS=Apis mellifera OX=7460 PE=4 SV=1	0	FALSE		52.599	35	12	40	12	373	42.3	6.71	0		4.24		8.94	4.59			14.3			3.37	7.36	6.63	21.73	2.62		2		3		3	2			7			1	4	3	6	3
FALSE	High	Master Protein	A0A088ANZ5	PCI domain-containing protein OS=Apis mellifera OX=7460 PE=4 SV=1	0.006	FALSE		3.418	3	1	1	1	418	47.5	5.72									2.49																	1
FALSE	High	Master Protein	A0A088AD77	PCI domain-containing protein OS=Apis mellifera OX=7460 PE=4 SV=1	0	FALSE		10.293	8	2	4	2	411	47.2	5.54						0			4.68						2.43								1			1						1
FALSE	High	Master Protein	A0A087ZT54	PDE4_UCR domain-containing protein OS=Apis mellifera OX=7460 PE=4 SV=1	0	FALSE		4.33	19	2	2	2	177	18.9	8.32						1.79			0														1			1
FALSE	High	Master Protein	A0A087ZXR8	PDZ domain-containing protein OS=Apis mellifera OX=7460 GN=100578519 PE=4 SV=1	0	FALSE		6.377	2	2	3	2	1116	126.5	5.86			2.09										1.72		1.98					1										1		1
FALSE	High	Master Protein	A0A088AMU0	PDZ domain-containing protein OS=Apis mellifera OX=7460 GN=HtrA2 PE=4 SV=1	0.01	FALSE		2.578	2	1	1	1	425	47.5	9.57															1.94																	1
FALSE	High	Master Protein	A0A088AUT1	PDZ domain-containing protein OS=Apis mellifera OX=7460 GN=LOC413207 PE=4 SV=1	0	FALSE		27.394	30	5	22	5	260	28.5	6.11	10.87			0	5.62	4.18		2.3	2.32	2.71	0	2.52	2.45	3.19		4.61	2.09	3			2	2	1		1	1	3	1	1	1	1		2	2
FALSE	High	Master Protein	A0A088AHV6	PDZ domain-containing protein OS=Apis mellifera OX=7460 PE=4 SV=1	0	FALSE		95.628	63	10	137	10	168	18.8	9.44	36.39		4.09		43.86	35.12			68.35		3.68	37.28	49.73	52.91	63.01	9.56		7		1		6	5			7		3	4	9	5	7	3
FALSE	High	Master Protein	A0A087ZY53	Peptidase A1 domain-containing protein OS=Apis mellifera OX=7460 GN=cathD PE=3 SV=1	0	FALSE		131.507	59	17	222	17	385	42.2	6.32	73.1	0	52.28	16.09	80.53	32.17	3.72	14.06	51.78	3.83	21.76	43.57	18.12	15.91	40.44	15	3.93	12	3	9	6	14	6	3	8	9	4	9	12	5	5	8	7	5
FALSE	High	Master Protein	A0A088ALY6	Peptidase S1 domain-containing protein OS=Apis mellifera OX=7460 GN=100576326 PE=3 SV=1	0	FALSE		90.438	42	14	176	14	417	45.9	5.71	31.94	14.27	10.83	13.54	26.33	11.07	7.77	54.69		40.62	1.67	7.54	2.02		0	2.26	5.6	10	9	4	6	8	5	6	11		10	2	4	1		1	3	5
FALSE	High	Master Protein	A0A088A9M1	Peptidase S1 domain-containing protein OS=Apis mellifera OX=7460 GN=SP22 PE=3 SV=1	0	FALSE		26.388	29	5	22	5	259	28	8.81								10.41			4	2.28				2.38	5.77								5			2	1				1	3
FALSE	High	Master Protein	A0A088ADM5	Peptidase S1 domain-containing protein OS=Apis mellifera OX=7460 GN=SP3 PE=3 SV=1	0	FALSE		56.832	43	11	34	11	353	39.5	6.81	10.84		6.38		0	17.71		0	2.07		0		11.97		2.3		0	5		4		1	5		2	3		3		5		2		2
FALSE	High	Master Protein	A0A088AGZ8	Peptidase S1 domain-containing protein OS=Apis mellifera OX=7460 GN=SP36 PE=3 SV=1	0	FALSE		71.809	53	8	91	8	263	28.1	7.68	3.29		23.52	4.72		8.13		33.57			23.26	15.25				8.93	22.27	1		6	3		2		6			6	5				5	5
FALSE	High	Master Protein	A0A088A984	Peptidase S1 domain-containing protein OS=Apis mellifera OX=7460 GN=SP44 PE=3 SV=1	0.001	FALSE		3.894	4	1	1	1	325	36.6	5.96			0																	1
FALSE	High	Master Protein	A0A088AEX0	Peptidase S1 domain-containing protein OS=Apis mellifera OX=7460 GN=SP8 PE=3 SV=1	0	FALSE		31.781	25	7	22	7	418	46.9	6.83	10.98	0		1.7				6.66		1.79							5.25	3	2		1				6		1							2
FALSE	High	Master Protein	A0A088AFN9	Peptidase S1 domain-containing protein OS=Apis mellifera OX=7460 GN=SPH55 PE=4 SV=1	0	FALSE		8.786	3	1	1	1	674	75.9	5.59			3.08																	1
FALSE	High	Master Protein	A0A088AEY3	Peptidase S1 domain-containing protein OS=Apis mellifera OX=7460 PE=3 SV=1	0	FALSE		23.463	26	4	9	4	259	28	6.77								9.88			0														4			2
FALSE	High	Master Protein	A0A088A359	Peptidase S1 domain-containing protein OS=Apis mellifera OX=7460 PE=3 SV=1	0	FALSE		44.429	41	11	105	11	391	43.7	5.39	15.98	9.57	8.58	5.19	2.09	0	5.91	22.15	0	18.84	0	0	0		8.79	0	8	6	6	4	4	3	1	7	11	1	10	1	2	1		3	1	6
FALSE	High	Master Protein	A0A087ZN40	Peptidase S1 domain-containing protein OS=Apis mellifera OX=7460 PE=3 SV=1	0	FALSE		50.366	44	8	97	8	276	29.4	8.75	15.11		25.74	11.89		9.58		54.67			22.03	14.12	0		2.26	23.28	9.9	3		6	5		4		8			8	6	1		1	5	4
FALSE	High	Master Protein	A0A087ZN39	Peptidase S1 domain-containing protein OS=Apis mellifera OX=7460 PE=3 SV=1	0	FALSE		53.117	69	10	22	10	268	28.6	8.57								35.22			0						7.15								10			1						4
FALSE	High	Master Protein	A0A087ZWJ6	Peptidase S59 domain-containing protein OS=Apis mellifera OX=7460 GN=Nup98 PE=4 SV=1	0	FALSE		9.61	2	3	3	3	1818	198.8	6.81						1.79			0						2.41								1			1						1
FALSE	High	Master Protein	A0A088A6L1	Peptidase S72 domain-containing protein OS=Apis mellifera OX=7460 GN=100576978 PE=4 SV=1	0	FALSE		16.186	14	3	25	1	276	31.2	6.25			5.13		4.56	6.68			4.25	0		0	1.92	0	2.97					1		2	2			1	2		1	2	1	1
FALSE	High	Master Protein	A0A087ZXX0	Peptidase_M14 domain-containing protein OS=Apis mellifera OX=7460 GN=LOC551327 PE=4 SV=1	0	FALSE		12.971	15	4	5	4	425	47.9	6.21								3.55									0								4									1
FALSE	High	Master Protein	A0A088ADK3	Peptidase_M24 domain-containing protein OS=Apis mellifera OX=7460 GN=LOC412221 PE=4 SV=1	0	FALSE		14.339	10	3	3	3	387	43.8	7.5	3.15														2.23	1.61		1														1	1
FALSE	High	Master Protein	A0A088AJR6	Peptidase_M28 domain-containing protein OS=Apis mellifera OX=7460 GN=LOC410149 PE=4 SV=1	0	FALSE		31.403	17	7	16	6	479	52.9	5.43	0							6.59				1.73	0				6.09	1							6				1	1				3
FALSE	High	Master Protein	A0A088ATY2	Peptidase_M28 domain-containing protein OS=Apis mellifera OX=7460 GN=LOC411943 PE=4 SV=1	0.006	FALSE		3.372	3	1	2	1	348	40.3	6.76	0												0					1												1
FALSE	High	Master Protein	A0A093S683	Peptide ABC transporter substrate-binding protein OS=Pectobacterium carotovorum subsp. carotovorum OX=555 GN=KP17_17240 PE=4 SV=1	0	FALSE	Bacteria	6.794	4	1	3	1	556	63	7.09								2.02																	1
FALSE	High	Master Protein	A0A088ABK0	Peptide-methionine (R)-S-oxide reductase OS=Apis mellifera OX=7460 PE=3 SV=1	0	FALSE		6.846	21	2	2	2	180	20.5	8.85								0			0														1			1
FALSE	High	Master Protein	A0A086FM61	Peptidoglycan-associated lipoprotein OS=Serratia marcescens OX=615 GN=pal PE=3 SV=1	0	FALSE	Bacteria	10.028	15	2	7	2	169	18.3	7.43								8.81			1.73														2			2
FALSE	High	Master Protein	A0A088A8W0	Peptidoglycan-recognition protein OS=Apis mellifera OX=7460 GN=Pgrp-s2 PE=3 SV=1	0	FALSE		5.271	12	2	2	2	194	21.5	8.66								1.87																	2
FALSE	High	Master Protein	A0A088AJM6	Peptidoglycan-recognition protein OS=Apis mellifera OX=7460 GN=PGRP-S3 PE=1 SV=1	0	FALSE		5.083	7	1	1	1	189	21.5	7.8	2.67																	1
FALSE	High	Master Protein	A0A088A8D4	Peptidyl-prolyl cis-trans isomerase OS=Apis mellifera OX=7460 GN=LOC409890 PE=3 SV=1	0	FALSE		60.85	52	10	143	9	209	22.8	9.14	45.79		10.52	12.76	12.16	15.43	4.8	12.94	5.81	12.58	11	11.89	27.37	33.38	10.75	20.88	7.13	8		3	6	3	4	2	3	2	3	5	5	6	3	3	6	4
FALSE	High	Master Protein	A0A088A5R9	Peptidyl-prolyl cis-trans isomerase OS=Apis mellifera OX=7460 PE=3 SV=1	0	FALSE		50.175	58	10	54	9	184	20.1	8.68	11.48		2.94	8.93	5.05	4.11	8.11	1.65	2.35	1.65	8		8.78	14.99	2.23	11.07	3.58	4		3	4	3	2	3	2	1	1	2		4	4	1	4	4
FALSE	High	Master Protein	A0A093SE48	Peptidyl-prolyl cis-trans isomerase OS=Pectobacterium carotovorum subsp. carotovorum OX=555 GN=KP17_10590 PE=3 SV=1	0	FALSE	Bacteria	4.754	6	1	1	1	272	28.9	5.94								3.03																	1
FALSE	High	Master Protein	A0A093SLE1	Peptidyl-prolyl cis-trans isomerase OS=Pectobacterium carotovorum subsp. carotovorum OX=555 GN=KP17_10600 PE=3 SV=1	0	FALSE	Bacteria	5.945	7	1	1	1	193	20.7	4.82								1.77																	1
FALSE	High	Master Protein	A0A088ABX3	Peptidylprolyl isomerase OS=Apis mellifera OX=7460 GN=FK506-bp1 PE=4 SV=1	0	FALSE		18.594	17	5	11	5	354	40.4	4.89	0				1.77				4.62				6.88		8.05			1				2				2				3		3
FALSE	High	Master Protein	A0A088A2S8	Peptidylprolyl isomerase OS=Apis mellifera OX=7460 GN=FK506-bp2 PE=4 SV=1	0	FALSE		18.209	29	2	24	2	109	11.8	7.99	7.26			0		3.52		3.09		11.8	5.9	7.64		3.15		4.35	0	2			1		1		1		2	2	2		1		1	1
FALSE	High	Master Protein	A0A087ZPR8	Peptidylprolyl isomerase OS=Apis mellifera OX=7460 GN=FKBP59 PE=4 SV=1	0	FALSE		24.675	19	6	14	6	459	51.5	5.58	2.38		3.89						0		0	0		4.93	3.33	2.27		2		2						1		1	1		2	1	4
FALSE	High	Master Protein	A0A088A5M5	Peptidylprolyl isomerase OS=Apis mellifera OX=7460 GN=LOC550701 PE=4 SV=1	0	FALSE		29.356	19	5	6	5	382	43.2	6.73									2.3						14.44											1						5
FALSE	High	Master Protein	A0A088AAR9	Peptidylprolyl isomerase OS=Apis mellifera OX=7460 PE=4 SV=1	0	FALSE		14.143	28	4	12	4	164	18.4	4.78	0		5.47			0						0		1.94		2.01	0	1		3			1						2		1		1	1
FALSE	High	Master Protein	A0A088A340	Peptidylprolyl isomerase OS=Apis mellifera OX=7460 PE=4 SV=1	0	FALSE		18.869	32	2	11	2	88	9.6	8.5								2.35			2.05	3.2		4.59		3.6	0								1			1	1		2		1	1
FALSE	High	Master Protein	A0A1C3HLD7	Periplasmic dipeptide transport protein OS=Serratia marcescens OX=615 GN=dppA_5 PE=4 SV=1	0	FALSE	Bacteria	7.174	6	3	4	3	535	59.8	7.2								4.09			1.67														3			1
FALSE	High	Master Protein	A0A088ADW6	Peroxidase-like protein OS=Apis mellifera OX=7460 PE=4 SV=1	0	FALSE		33.945	17	7	12	7	745	85	6.71	27.29																	7
FALSE	High	Master Protein	A0A087ZYL4	Peroxiredoxin OS=Apis mellifera OX=7460 GN=Prx5 PE=3 SV=1	0	FALSE		45.375	52	6	73	6	185	20.2	8.84	22.13	0	6.49	5.77	14.23	12.21	2.38	11.56	6.45	3.01	22.96	17.15	6.57	7.17	9.65	11.56	2.17	3	1	2	2	3	4	1	3	2	3	6	5	1	3	3	3	1
FALSE	High	Master Protein	A0A0P0QHR6	Peroxiredoxin OS=Serratia marcescens OX=615 GN=bcp PE=4 SV=1	0.01	FALSE	Bacteria	2.489	9	1	1	1	154	17.4	5.21								0																	1
FALSE	High	Master Protein	A0A2G4QAQ8	Peroxiredoxin OS=Serratia marcescens OX=615 GN=CS371_17820 PE=4 SV=1	0	FALSE	Bacteria	12.95	17	2	5	2	200	22.2	5.82								9.79																	2
FALSE	High	Master Protein	A0A088A9F5	Pex14_N domain-containing protein OS=Apis mellifera OX=7460 GN=LOC552256 PE=4 SV=1	0	FALSE		12.796	26	3	4	3	265	30	6.29									6.03							0										3							1
FALSE	High	Master Protein	A0A087ZS94	PfkB domain-containing protein OS=Apis mellifera OX=7460 GN=LOC408441 PE=4 SV=1	0	FALSE		12.623	15	3	5	3	345	38.5	5.82	1.9										0							2										2
FALSE	High	Master Protein	A0A088AFQ2	PH domain-containing protein OS=Apis mellifera OX=7460 GN=LOC408836 PE=4 SV=1	0	FALSE		44.998	18	10	24	10	713	81.1	6.8	2.04		13.31		1.63	6.55	0		3.59			5.59	5.03	1.93	3.64	2.1		1		5		2	3	1		1			2	4	1	1	1
FALSE	High	Master Protein	A0A087ZUN9	PH domain-containing protein OS=Apis mellifera OX=7460 PE=4 SV=1	0	FALSE		7.689	3	1	2	1	792	90	6.24														0	3.74																1	1
FALSE	High	Master Protein	A0A093STL4	Phage shock protein OS=Pectobacterium carotovorum subsp. carotovorum OX=555 GN=KP17_02405 PE=4 SV=1	0	FALSE	Bacteria	6.03	6	1	1	1	221	25.1	5.62								2.11																	1
FALSE	High	Master Protein	A0A088A9W3	PHB domain-containing protein OS=Apis mellifera OX=7460 GN=Flo1 PE=3 SV=1	0	FALSE		13.723	9	3	7	3	429	47.5	5.55				5.17	1.78	0			2.33				2.17	0							2	1	1			1				1	1
FALSE	High	Master Protein	A0A088AJY9	PHB domain-containing protein OS=Apis mellifera OX=7460 GN=Flo2 PE=3 SV=1	0	FALSE		48.992	32	10	23	10	402	44	5.73			0	8.47	4.51	2.03			6.7				5.92		9.61					2	4	3	3			3				4		3
FALSE	High	Master Protein	A0A088AD80	PHB domain-containing protein OS=Apis mellifera OX=7460 GN=LOC551427 PE=4 SV=1	0	FALSE		6.052	5	1	1	1	324	37.2	6.33														3.29																	1
FALSE	High	Master Protein	A0A088AMB1	PHB domain-containing protein OS=Apis mellifera OX=7460 GN=LOC551944 PE=4 SV=1	0	FALSE		123.835	51	15	287	15	353	39.5	9.06	42.34		76.92	47.25	71.87	64.14	17.89		66.73	14.73		50.42	65.48	30.4	67.63	23.74	2.26	11		12	11	13	12	8		12	8		11	8	10	6	8	2
FALSE	High	Master Protein	A0A087ZYC8	PHB domain-containing protein OS=Apis mellifera OX=7460 PE=4 SV=1	0	FALSE		67.022	44	11	47	11	380	42.7	8.43	3.46		21.9	6.22	13.2	5.46			8.61			2.88	11.42		20.42			3		8	6	5	2			3			1	6		6
FALSE	High	Master Protein	A0A088AHV4	Phos_pyr_kin domain-containing protein OS=Apis mellifera OX=7460 GN=LOC552663 PE=4 SV=1	0	FALSE		10.915	15	3	3	3	296	33.3	6.55														0		3.81															1		2
FALSE	High	Master Protein	A0A088ASM4	Phosphate carrier OS=Apis mellifera OX=7460 GN=LOC413517 PE=2 SV=1	0	FALSE		136.377	51	18	342	18	354	39.1	9.1	37.63		48.75	57.01	80.55	51.09	24.42	0	69.04	21.56	1.61	37.5	49.09	31.1	77.49	14.42	0	11		12	14	15	12	9	2	14	6	1	14	11	9	11	9	1
FALSE	High	Master Protein	A0A088AAD6	Phosphatidylinositol-4,5-bisphosphate 4-phosphatase OS=Apis mellifera OX=7460 GN=LOC408301 PE=4 SV=1	0	FALSE		11.556	13	2	3	2	253	27.3	8.4									3.15						0											1						1
FALSE	High	Master Protein	A0A0M4RKY6	Phosphocarrier protein HPr OS=Serratia marcescens OX=615 GN=ptsH PE=4 SV=1	0	FALSE	Bacteria	9.536	35	2	2	2	85	9.1	5.83								2.82																	2
FALSE	High	Master Protein	A0A087ZT55	Phosphodiesterase OS=Apis mellifera OX=7460 GN=dnc PE=3 SV=1	0	FALSE		15.42	8	3	4	3	534	59.7	5.02									2.32						3.13	0										2						1	1
FALSE	High	Master Protein	A0A1Q5W146	Phosphoenolpyruvate-protein phosphotransferase OS=Serratia marcescens OX=615 GN=A8A12_10305 PE=3 SV=1	0	FALSE	Bacteria	4.168	2	1	1	1	575	63.1	4.82								0																	1
FALSE	High	Master Protein	A0A087ZNJ8	Phosphoglycerate kinase OS=Apis mellifera OX=7460 GN=Pgk PE=3 SV=1	0	FALSE		137.888	74	24	190	24	415	45	8.12	57.43			13.59	0	22.03	0	55.62	20.27		39.61	33.38	25.61	38.59	12.4	37.01	0	13			11	1	8	2	17	9		14	11	10	11	5	17	5
FALSE	High	Master Protein	A0A093S5B7	Phosphoglycerate kinase OS=Pectobacterium carotovorum subsp. carotovorum OX=555 GN=pgk PE=3 SV=1	0	FALSE	Bacteria	19.567	20	5	9	5	387	41.1	5.47								11.16			2.07														5			3
FALSE	High	Master Protein	A0A088A4K0	Phosphoglycerate mutase OS=Apis mellifera OX=7460 PE=3 SV=1	0	FALSE		151.515	63	18	354	18	312	35.3	9.35	115.82	4.26	15.71	41.62	40.77	93.86	21.71	73.9	17.96	27.12	69.36	80.48	39.13	29.07	5.6	35.17	11.03	16	3	6	13	10	15	10	15	5	13	16	15	11	7	2	11	9
FALSE	High	Master Protein	B7UUK1	Phospholipase A2 OS=Apis mellifera OX=7460 GN=pla2 PE=2 SV=1	0	FALSE		137.641	72	11	784	11	167	19	7.39	14.33	49.73		197.65	116.36	42.72	86.44	25.15	30.99	75.11	120.77	0	5.25		5.15	538.35	98.45	4	8		9	8	8	9	7	8	8	9	3	2		2	10	8
FALSE	High	Master Protein	A0A087ZYS8	Phospholipid-transporting ATPase OS=Apis mellifera OX=7460 PE=3 SV=1	0.006	FALSE		3.485	1	1	1	1	1123	127.8	8.03															3.05																	1
FALSE	High	Master Protein	A0A088A245	Phosphomannomutase OS=Apis mellifera OX=7460 GN=LOC550926 PE=3 SV=1	0	FALSE		24.46	30	5	10	5	262	30.4	5.95	6.48			2.11							2.04	0			3.64	4.6		4			1							1	1			1	2
FALSE	High	Master Protein	A0A088A6W8	Phosphotransferase OS=Apis mellifera OX=7460 PE=3 SV=1	0	FALSE		36.218	35	11	19	11	445	49.6	6.27						1.71		8.69			2.11	1.78	0			9.79	0						1		5			1	3	1			5	2
FALSE	High	Master Protein	A0A088AMP9	PID domain-containing protein OS=Apis mellifera OX=7460 GN=102656070 PE=4 SV=1	0	FALSE		16.478	13	5	8	5	558	60.6	9.77			4.06			4.55							2.02		0					2			2							1		1
FALSE	High	Master Protein	A0A087ZS23	PID domain-containing protein OS=Apis mellifera OX=7460 GN=ced-6 PE=4 SV=1	0	FALSE		5.102	4	2	3	2	459	51.1	6.7			0			0							0							1			1							1
FALSE	High	Master Protein	A0A088AMH9	PIPK domain-containing protein OS=Apis mellifera OX=7460 GN=LOC409276 PE=4 SV=1	0	FALSE		11.751	7	3	5	3	494	56.7	7.52											0		2.38	1.68	0	2.9												1		1	1	1	1
FALSE	High	Master Protein	A0A088AEL8	PKcGMP_CC domain-containing protein OS=Apis mellifera OX=7460 PE=4 SV=1	0.006	FALSE		3.561	11	2	2	2	174	19.2	7.72									0				0													1				1
FALSE	High	Master Protein	A0A088ATI9	PKS_ER domain-containing protein OS=Apis mellifera OX=7460 GN=LOC408643 PE=4 SV=1	0	FALSE		76.844	44	12	84	12	401	44.2	6.15	3.83		25.99	0		26.9		0	5.42		7.94	11.92	4.28	21.99	6.68	15.44	0	3		7	2		9		1	3		6	8	3	5	3	6	1
FALSE	High	Master Protein	A0A088A347	PKS_ER domain-containing protein OS=Apis mellifera OX=7460 GN=LOC409207 PE=4 SV=1	0	FALSE		45.77	28	9	33	9	471	51.3	5.76	2.2			22.78	8.85				6.26	0	0		4.43	2.1	17.94	0		1			7	4				2	3	1		3	1	4	1
FALSE	High	Master Protein	A0A088AD00	PKS_ER domain-containing protein OS=Apis mellifera OX=7460 GN=LOC410167 PE=4 SV=1	0	FALSE		25.94	25	5	9	5	338	36.7	8.02	16.11							0										5							1
FALSE	High	Master Protein	A0A087ZU72	PKS_ER domain-containing protein OS=Apis mellifera OX=7460 PE=3 SV=1	0	FALSE		43.779	30	8	24	8	364	39.8	7.8	10.89		2.08	0		1.95	0	10.48			1.7		5.15	2.32		2.82	1.97	3		1	1		1	1	6			1		2	1		1	3
FALSE	High	Master Protein	A0A087ZXT8	PKS_ER domain-containing protein OS=Apis mellifera OX=7460 PE=4 SV=1	0	FALSE		38.895	33	6	28	6	342	38.1	9.04	7.38		2.65		2.7	12.65		0	7.97		5.39	9.97	2.03	8.09		0		3		1		2	4		2	3		2	4	1	3		1
FALSE	High	Master Protein	A0A088AE44	PLAC domain-containing protein OS=Apis mellifera OX=7460 GN=LOC409970 PE=4 SV=1	0	FALSE		74.419	35	13	22	13	629	70	7.23									0	32.02																1	13
FALSE	High	Master Protein	A0A088A2S7	PlsC domain-containing protein OS=Apis mellifera OX=7460 GN=LOC552089 PE=4 SV=1	0	FALSE		9.331	8	2	3	2	318	36.7	8.95			2.21		0									2.35						1		1									1
FALSE	High	Master Protein	A0A088AHM2	PlsC domain-containing protein OS=Apis mellifera OX=7460 GN=LOC552688 PE=4 SV=1	0	FALSE		6.282	8	2	2	2	376	44	8.87									0					0												1					1
FALSE	High	Master Protein	A0A088A890	PlsC domain-containing protein OS=Apis mellifera OX=7460 PE=3 SV=1	0	FALSE		51.179	25	12	15	12	661	76.4	9.23									19.84			0		4.64	6.18	1.67										9			1		2	2	1
FALSE	High	Master Protein	A0A088ALS3	PlsC domain-containing protein OS=Apis mellifera OX=7460 PE=4 SV=1	0	FALSE		29.998	37	6	15	6	273	31.6	9.55			2.61		6.53	4.77			3.01				6.72	2.14	8.78					2		3	2			1				2	1	2
FALSE	High	Master Protein	A0A087ZSU4	Plug_translocon domain-containing protein OS=Apis mellifera OX=7460 GN=Sec61alpha PE=3 SV=1	0	FALSE		39.066	25	8	16	8	476	52.4	8.38	1.74		6.58		2.52				2.74			0	2.24		8.46	0		1		3		2				3			1	1		3	1
FALSE	High	Master Protein	A0A087ZWP1	PNP_UDP_1 domain-containing protein OS=Apis mellifera OX=7460 GN=LOC411599 PE=4 SV=1	0.008	FALSE		3.055	4	1	1	1	362	41.2	8.91				0																	1
FALSE	High	Master Protein	Q15F62	Pol polyprotein OS=Nosema bombycis OX=27978 PE=4 SV=1	0.006	FALSE	Nosema	3.211	1	1	1	1	1238	140.9	8.95																0																	1
FALSE	High	Master Protein	A0A2G4P0U4	Polyribonucleotide nucleotidyltransferase OS=Serratia marcescens OX=615 GN=pnp PE=3 SV=1	0	FALSE	Bacteria	12.998	8	4	4	4	705	76.2	5.24								0																	4
FALSE	High	Master Protein	A0A2G4P5Z5	Porin OmpC OS=Serratia marcescens OX=615 GN=CS366_15700 PE=3 SV=1	0	FALSE	Bacteria	7.652	5	2	4	1	369	40.4	4.91								5.34																	2
FALSE	High	Master Protein	A0A221FMK6	Porin OS=Serratia marcescens OX=615 GN=BVG93_05450 PE=3 SV=1	0	FALSE	Bacteria	4.524	5	2	4	1	369	40.7	5.06								5.9																	2
FALSE	High	Master Protein	A0A088AHI2	POU domain protein OS=Apis mellifera OX=7460 GN=LOC410203 PE=3 SV=1	0	FALSE		8.664	4	1	1	1	460	49.3	8.19															0																	1
FALSE	High	Master Protein	A0A088AUX7	PRA1 family protein OS=Apis mellifera OX=7460 GN=LOC410130 PE=3 SV=1	0	FALSE		16.737	22	4	40	4	196	22.4	9.22	2.42		9.65	0	5.48	10.44			15.74	0		6.94	7.15	13.08	10.41			1		2	1	2	3			3	2		3	2	3	2
FALSE	High	Master Protein	A0A093RQZ3	Preprotein translocase subunit YajC OS=Pectobacterium carotovorum subsp. carotovorum OX=555 GN=yajC PE=4 SV=1	0.009	FALSE	Bacteria	2.616	8	1	2	1	110	11.8	9.52								3.95																	1
FALSE	High	Master Protein	A0A088AR33	Pribosyltran domain-containing protein OS=Apis mellifera OX=7460 GN=Aprt PE=3 SV=1	0	FALSE		13.103	21	2	3	2	178	20	6.05				2.54								3.14	3.2								1								1	1
FALSE	High	Master Protein	A0A087ZTI8	Pribosyltran_N domain-containing protein OS=Apis mellifera OX=7460 GN=LOC551448 PE=4 SV=1	0.008	FALSE		3.044	3	1	1	1	370	40.5	8.27	0																	1
FALSE	High	Master Protein	A0A084X6Y4	Probable cytosol aminopeptidase OS=Serratia marcescens OX=615 GN=pepA PE=3 SV=1	0.009	FALSE	Bacteria	2.625	2	1	1	1	503	54.7	7.23								0																	1
FALSE	High	Master Protein	A0A087ZNT2	Profilin OS=Apis mellifera OX=7460 GN=PRF PE=3 SV=1	0	FALSE		52.955	73	6	104	6	126	13.8	5.92	32.05	2.03	3	9.94	15.74	19.95	0	27.73	2.82	4.1	19.37	23.01	16.39	13.83		23.8	7.7	5	2	1	2	5	5	1	5	2	5	5	5	3	4		5	4
FALSE	High	Master Protein	A0A088AGQ1	Prohibitin OS=Apis mellifera OX=7460 GN=LOC408412 PE=3 SV=1	0	FALSE		154.066	81	17	408	17	271	30	7.06	68.01		111.51	82.02	89.23	87.87	36.82		100.01	25.22		73.91	96.52	56.82	84.41	35.09	5.01	14		15	15	13	14	9		15	11		15	12	11	13	9	3
FALSE	High	Master Protein	A0A088AGP0	Prohormone-3 Brain peptide ITGQGNRIF OS=Apis mellifera OX=7460 PE=4 SV=1	0	FALSE		12.59	23	4	6	4	264	29.5	7.08				0																	4
FALSE	High	Master Protein	F1DFM1	Projectin long variant (Fragment) OS=Apis mellifera OX=7460 GN=PEVK PE=2 SV=1	0	FALSE		125.472	38	19	61	1	482	55.3	9.45						3.54	1.92		18.6			3.45	26.34	42.46	42.03	0							2	1		7			2	10	7	8	2
FALSE	High	Master Protein	A0A088A8H2	Proline dehydrogenase OS=Apis mellifera OX=7460 PE=3 SV=1	0	FALSE		115.333	49	17	97	17	516	59.6	8.69	4.79		29.11	28.16	15.74	11.69			38.2		0	12.65	13.99	28.59	53.44			3		8	10	7	4			10		2	5	5	7	13
FALSE	High	Master Protein	Q86MV4	Prophenoloxidase OS=Apis mellifera OX=7460 GN=PPO PE=2 SV=2	0	FALSE		270.097	66	39	530	38	693	80	6.76	102.25	52.59	51.01	71.1	46.65	79.75	63.63	171.33	7.7	36.05	19.01	39.83	12.68	2.35	9.6	29.09	18.51	25	24	13	22	17	20	23	34	3	26	15	15	12	1	3	14	13
FALSE	High	Master Protein	A0A088A859	Proteasome endopeptidase complex OS=Apis mellifera OX=7460 GN=Pros29 PE=3 SV=1	0	FALSE		17.319	9	3	8	3	622	70.8	6.24	3.52					2.99			6.88				1.91	5.84		1.74		1					1			1				1	2		1
FALSE	High	Master Protein	A0A088A379	Proteasome subunit alpha type OS=Apis mellifera OX=7460 GN=LOC410095 PE=3 SV=1	0	FALSE		25.755	27	5	13	5	249	28.1	8.46				1.69		0							1.83	6.53	5.43	0	0				2		1							1	3	2	1	2
FALSE	High	Master Protein	A0A088ATC7	Proteasome subunit alpha type OS=Apis mellifera OX=7460 GN=LOC552654 PE=3 SV=1	0	FALSE		7.268	10	2	2	2	276	30.9	6.18															2.38	0																1	1
FALSE	High	Master Protein	A0A088AQ82	Proteasome subunit alpha type OS=Apis mellifera OX=7460 GN=Pros25 PE=3 SV=1	0	FALSE		5.032	8	1	4	1	234	25.8	7.36														2.49	3.17	0															1	1	1
FALSE	High	Master Protein	A0A087ZZN8	Proteasome subunit alpha type OS=Apis mellifera OX=7460 GN=Prosalpha5 PE=3 SV=1	0	FALSE		12.944	22	3	8	3	242	26.7	4.92				0	2.05			0					0	4.53	3.36	0					1	1			1					1	2	1	1
FALSE	High	Master Protein	A0A088AP06	Proteasome subunit alpha type OS=Apis mellifera OX=7460 GN=Prosalpha7 PE=3 SV=1	0.008	FALSE		3.026	4	1	1	1	254	27.9	6.09														0																	1
FALSE	High	Master Protein	A0A088A1E9	Proteasome subunit beta OS=Apis mellifera OX=7460 GN=LOC408353 PE=3 SV=1	0	FALSE		6.937	7	1	2	1	277	30.3	7.42									3.86					2.08												1					1
FALSE	High	Master Protein	A0A087ZWB2	Proteasome subunit beta OS=Apis mellifera OX=7460 GN=LOC409978 PE=3 SV=1	0.006	FALSE		3.276	4	1	7	1	207	23.6	6.92				0	0			0	1.83			1.88		3.92							1	1			1	1			1		1
FALSE	High	Master Protein	A0A088AM79	Proteasome subunit beta OS=Apis mellifera OX=7460 GN=LOC411520 PE=3 SV=1	0	FALSE		17.388	20	3	5	3	267	30	7.84	2				2.75									2.84	3.91			1				1									2	1
FALSE	High	Master Protein	A0A088AMG0	Proteasome subunit beta OS=Apis mellifera OX=7460 GN=LOC552579 PE=3 SV=1	0	FALSE		6.963	10	2	2	2	205	23	5.25	2.48				0													1				1
FALSE	High	Master Protein	A0A087ZMT8	PROTEASOME_ALPHA_1 domain-containing protein OS=Apis mellifera OX=7460 PE=4 SV=1	0	FALSE		7.029	26	2	3	2	119	13.1	6.79					1.71				1.93					0								1				1					1
FALSE	High	Master Protein	A0A088A7Y2	Protein disulfide-isomerase OS=Apis mellifera OX=7460 GN=ERp60 PE=3 SV=1	0	FALSE		138.508	55	23	158	23	490	55.8	5.77	54.59		20.39	4.27	17.64	9.86		1.97	30.23	3.45	2.15	12.36	29.53	17.36	46.21	18.79	3.97	12		5	4	9	4		4	10	6	7	7	10	6	9	10	8
FALSE	High	Master Protein	A0A088A7L2	Protein disulfide-isomerase OS=Apis mellifera OX=7460 PE=3 SV=1	0	FALSE		120.257	63	24	118	24	496	56.2	5.12	32.86		22.22	0	2.64	2.18		4.47	2.43	2.23	1.72	11.84	2.3	25.62	9.35	29.54	9.49	14		8	6	2	1		4	3	7	4	7	3	9	2	13	7
FALSE	High	Master Protein	A0A2G4Q6S8	Protein HflK OS=Serratia marcescens OX=615 GN=CS371_21170 PE=3 SV=1	0	FALSE	Bacteria	6.91	4	1	1	1	416	45.3	8.19								3.23																	1
FALSE	High	Master Protein	A0A087ZW71	Protein kinase domain-containing protein OS=Apis mellifera OX=7460 GN=CkIIalpha PE=3 SV=1	0	FALSE		43.82	16	6	19	6	468	55.6	8.56	1.97			0		10.35			10.55					3.89	14.7	0		1			1		4			4					1	3	1
FALSE	High	Master Protein	A0A088AFE4	Protein kinase domain-containing protein OS=Apis mellifera OX=7460 GN=Csnk1a1 PE=3 SV=1	0	FALSE		20.762	17	5	14	5	350	40.3	9.51			0		0	0			6.09			1.64			3.41					2		1	1			3			1			2
FALSE	High	Master Protein	A0A088AAV8	Protein kinase domain-containing protein OS=Apis mellifera OX=7460 GN=LOC413190 PE=4 SV=1	0	FALSE		14.456	8	4	6	4	703	79.7	6.57	2.89					1.64			0						2.85			1					1			1						2
FALSE	High	Master Protein	A0A088ATD3	Protein kinase domain-containing protein OS=Apis mellifera OX=7460 PE=3 SV=1	0	FALSE		26.172	27	7	15	6	410	46.4	8.51			1.95		4.54	1.76			7.44			2.07	3.56		2.53	2.01				1		2	1			4			1	2		1	3
FALSE	High	Master Protein	A0A088AP50	Protein kinase domain-containing protein OS=Apis mellifera OX=7460 PE=4 SV=1	0	FALSE		17.335	11	3	18	3	512	58.4	9.06	0		4.66	2.06	0	2.12			0		0	0		0	2.75	0		2		2	2	1	2			1		1	3		1	1	1
FALSE	High	Master Protein	A0A087ZP17	Protein kinase domain-containing protein OS=Apis mellifera OX=7460 PE=4 SV=1	0	FALSE		4.255	4	1	2	1	652	72	8.22	0													2.49				1													1
FALSE	High	Master Protein	A0A088AUS2	Protein kish OS=Apis mellifera OX=7460 GN=LOC725059 PE=3 SV=1	0.005	FALSE		3.626	14	1	1	1	74	8.4	9.22															2.33																	1
FALSE	High	Master Protein	A0A088AVD7	Protein lin-7 homolog OS=Apis mellifera OX=7460 GN=LOC552362 PE=3 SV=1	0	FALSE		30.939	34	5	12	5	198	21.8	8.15						0			5.59		0	6.17	2.06	3.06	6.61	0							1			2		1	3	1	1	2	1
FALSE	High	Master Protein	A0A088ACJ9	Protein RER1 OS=Apis mellifera OX=7460 GN=LOC410094 PE=3 SV=1	0	FALSE		14.367	18	3	6	3	197	23.6	8.82	3.35								3.01	0			0		2.76	0		1								1	1			1		1	1
FALSE	High	Master Protein	A0A088AP14	Protein transport protein SEC23 OS=Apis mellifera OX=7460 GN=LOC408983 PE=3 SV=1	0	FALSE		6.642	4	2	3	2	775	86.5	7.01					1.61								0	1.99								1								1	1
FALSE	High	Master Protein	A0A088APZ1	Protein transport protein Sec61 subunit beta OS=Apis mellifera OX=7460 GN=Sec61beta PE=3 SV=1	0	FALSE		17.043	52	2	13	2	94	10	11	2.22		5.42		2.77	1.94			4.68					0	6.01	2.56		1		1		1	1			1					1	1	1
FALSE	High	Master Protein	A0A088AA80	Protein YIPF OS=Apis mellifera OX=7460 GN=102654121 PE=3 SV=1	0	FALSE		6.585	5	1	4	1	249	27.2	4.34			2.74		1.97								2.25		3.13					1		1								1		1
FALSE	High	Master Protein	A0A086FGT2	Protein-export protein SecB OS=Serratia marcescens OX=615 GN=secB PE=3 SV=1	0	FALSE	Bacteria	5.173	13	1	2	1	156	17.2	4.25								0																	1
FALSE	High	Master Protein	A0A087ZYZ9	Protein-L-isoaspartate O-methyltransferase OS=Apis mellifera OX=7460 PE=3 SV=1	0	FALSE		18.918	33	5	11	5	264	28.6	5.41	2.14					0			0		0	0						2					2			1		3	2
FALSE	High	Master Protein	A0A087ZXB2	Protoporphyrinogen oxidase OS=Apis mellifera OX=7460 GN=Ppox PE=3 SV=1	0	FALSE		13.5	13	4	5	4	477	53.3	9			2.23								0		2.33							2								2		1
FALSE	High	Master Protein	A0A2H4MCS2	Pterin-4-alpha-carbinolamine dehydratase (Fragment) OS=Apis mellifera OX=7460 GN=PCD PE=2 SV=1	0	FALSE		9.339	32	3	10	3	117	13.8	9.14	3.91					0		0		0	0	1.69						1					1		2		2	1	2
FALSE	High	Master Protein	A0A093STK2	PTS sugar transporter OS=Pectobacterium carotovorum subsp. carotovorum OX=555 GN=KP17_11615 PE=4 SV=1	0	FALSE	Bacteria	4.3	15	1	1	1	85	9.1	5.83								2.1																	1
FALSE	High	Master Protein	Q8L3C4	PTS system glucose-specific component IIA OS=Serratia marcescens OX=615 GN=crr PE=4 SV=1	0	FALSE	Bacteria	17.183	20	3	6	2	169	18.2	4.98								11.11			0					0									3			1					1
FALSE	High	Master Protein	A0A093UYV2	PTS system glucose-specific transporter subunit IIA OS=Pectobacterium carotovorum subsp. carotovorum OX=555 GN=KP17_11625 PE=4 SV=1	0	FALSE	Bacteria	13.818	17	2	5	1	169	18.3	4.92								5.19																	2
FALSE	High	Master Protein	A0A088AP40	P-type domain-containing protein OS=Apis mellifera OX=7460 PE=3 SV=1	0	FALSE		20.38	9	6	9	6	907	105.2	7.52	2.57							1.98			0					0	0	4							1			1					1	2
FALSE	High	Master Protein	A0A087ZR59	PUA domain-containing protein OS=Apis mellifera OX=7460 GN=LOC413805 PE=4 SV=1	0	FALSE		6.126	8	2	2	2	517	58.5	9.1									3.38																	2
FALSE	High	Master Protein	A0A088AGW6	PUA domain-containing protein OS=Apis mellifera OX=7460 GN=LOC726009 PE=4 SV=1	0.001	FALSE		3.924	7	1	1	1	182	20.4	9.23	1.82																	1
FALSE	High	Master Protein	Q9NAS6	Putative cAMP-dependent protein kinase catalytic subunit OS=Apis mellifera carnica OX=88217 GN=co PE=2 SV=1	0	FALSE		12.497	12	3	9	3	353	40.6	8.81	0		2.25		0	2.04			0		0	0	1.87					1		1		1	1			1		1	1	1
FALSE	High	Master Protein	A0A222LPT2	Putative cyclin-dependent serine/threonine-protein kinase OS=Apis mellifera OX=7460 PE=2 SV=1	0	FALSE		50.044	15	12	35	12	1511	175.7	5.25	16.12	13.43			3.28	2.62		3.72		0			1.84				0	8	8			2	2		4		2			3				1
FALSE	High	Master Protein	M9T1J1	Putative elongation factor Tu (Fragment) OS=Lactobacillus apis OX=303541 GN=tuf PE=4 SV=1	0	FALSE		19.068	31	5	10	4	246	27.1	4.89	2.89							6.52							1.82		1.99	1							4							1		1
FALSE	High	Master Protein	A0A088A8F0	Putative H3K9 methyltransferase OS=Apis mellifera OX=7460 PE=4 SV=1	0	FALSE		8.527	4	3	4	3	1026	115.7	8.27	0		2.37		0											0		1		1		1											1
FALSE	High	Master Protein	A0A087ZTR2	PWWP domain-containing protein OS=Apis mellifera OX=7460 GN=LOC552332 PE=4 SV=1	0	FALSE		20.2	11	4	4	4	549	62.1	8.07			5.06												6.87					2												2
FALSE	High	Master Protein	A0A088AUI8	PWWP domain-containing protein OS=Apis mellifera OX=7460 PE=4 SV=1	0	FALSE		20.542	18	5	27	5	303	34	9.48	2.03		10.9		6.1	6.01			8.37	0		2.03	5.62		3.86			2		3		2	3			2	1		2	3		1
FALSE	High	Master Protein	A0A088A6E1	PX domain-containing protein OS=Apis mellifera OX=7460 GN=LOC409132 PE=4 SV=1	0	FALSE		8.427	13	2	3	2	163	19	9.14	2.79					1.86						1.94						1					1						1
FALSE	High	Master Protein	A0A088AL66	PX domain-containing protein OS=Apis mellifera OX=7460 PE=4 SV=1	0	FALSE		25.214	10	5	11	5	510	57.7	5.27	3.6		1.7		0	0						1.75		3.48	2.8	0		2		1		1	2						1		1	1	2
FALSE	High	Master Protein	A0A088AC70	Pyr_redox_2 domain-containing protein OS=Apis mellifera OX=7460 PE=4 SV=1	0	FALSE		147.468	45	19	123	19	469	53.3	9.1	6.08		89.45		2.15	24.56			36.01		1.61	15.76	11.87	16.53	84.05	18.8		2		13		2	8			8		5	5	4	6	13	10
FALSE	High	Master Protein	A0A087ZNH6	Pyruvate carboxylase OS=Apis mellifera OX=7460 GN=LOC412876 PE=4 SV=1	0	FALSE		153.454	37	28	67	28	1196	131.8	6.99	56.22		0		0			0	12.83		0		3.99	22.87	24.39	5.19		20		3		1			1	7		1		2	7	8	4
FALSE	High	Master Protein	A0A0G3SPY1	Pyruvate dehydrogenase E1 component OS=Serratia marcescens OX=615 GN=aceE_3 PE=4 SV=1	0	FALSE	Bacteria	19.37	7	6	6	6	887	99.5	5.69								5.77																	6
FALSE	High	Master Protein	A0A088AA89	Pyruvate dehydrogenase E1 component subunit alpha OS=Apis mellifera OX=7460 GN=LOC551103 PE=4 SV=1	0	FALSE		139.342	54	21	194	21	402	44.5	7.88	31.59		20.52	0	84.06	33.38	1.91		94.56	0	2.05	14.6	52.41	37.27	65.28	14.04		7		6	2	17	9	2		16	2	3	4	12	6	11	6
FALSE	High	Master Protein	A0A088AUU5	Pyruvate dehydrogenase E1 component subunit beta OS=Apis mellifera OX=7460 PE=4 SV=1	0	FALSE		149.162	60	14	278	14	335	36.3	5.44	69.64		44.95	32.94	77.76	35.51	12.63	2.14	102.98	1.79	12.36	34.52	100.03	72.05	112.38	22.1	0	10		7	9	9	9	6	2	10	3	7	10	12	10	12	8	1
FALSE	High	Master Protein	A0A088A5I8	Pyruvate kinase OS=Apis mellifera OX=7460 PE=3 SV=1	0	FALSE		277.111	59	29	529	29	609	66.5	7.31	174.39	0	14.18	69.02	21.1	67.11	6.01	75.62	115.44	6.38	158.12	38.69	115.51	85.65	141.44	153.33	16.5	21	1	5	15	7	16	4	19	17	6	23	14	20	15	22	24	11
FALSE	High	Master Protein	A0A093SU03	Pyruvate kinase OS=Pectobacterium carotovorum subsp. carotovorum OX=555 GN=KP17_02975 PE=3 SV=1	0	FALSE	Bacteria	5.888	9	2	2	2	470	50.4	6.29								0																	2
FALSE	High	Master Protein	A0A093V694	Quinone oxidoreductase OS=Pectobacterium carotovorum subsp. carotovorum OX=555 GN=KP17_08135 PE=4 SV=1	0.008	FALSE	Bacteria	3.087	4	1	1	1	327	34.7	7.37								1.85																	1
FALSE	High	Master Protein	A0A088AUN5	Rab GDP dissociation inhibitor OS=Apis mellifera OX=7460 GN=Gdi PE=3 SV=1	0	FALSE		40.097	31	9	28	9	442	49.8	5.58	8.16			2.64		11.12		0	2.19	0		0		7.54		5.11		4			3		4		2	1	1		4		2		3
FALSE	High	Master Protein	A0A087ZUJ9	Rab proteins geranylgeranyltransferase component A OS=Apis mellifera OX=7460 PE=3 SV=1	0	FALSE		27.166	14	5	9	5	511	57.9	4.84	2.26			8.76									0			0		1			3									2			1
FALSE	High	Master Protein	A0A088A8F1	Rab-GAP TBC domain-containing protein OS=Apis mellifera OX=7460 GN=RabGAP7 PE=4 SV=1	0.008	FALSE		2.952	3	1	1	1	357	41.6	8.34			1.69																	1
FALSE	High	Master Protein	A0A0H3V1A0	Receptor associated protein RIC-3, alternatively spliced OS=Apis mellifera OX=7460 GN=Ric-3 PE=2 SV=1	0	FALSE		77.709	36	12	42	12	454	50.2	8.06					15.57	3.92	0		26.07				4.19	7.87	35.31							4	3	1		9				2	4	7
FALSE	High	Master Protein	A0A087ZTL5	Receptor expression-enhancing protein OS=Apis mellifera OX=7460 GN=LOC551678 PE=3 SV=1	0	FALSE		32.73	31	5	40	5	178	20.8	8.28	4.4	0	12.76	2.4	5.17	4.04			6.5	2.06		6.66	2.82	12.75	19.82	6.39	3.6	2	1	4	1	1	2			3	1		2	1	2	4	2	1
FALSE	High	Master Protein	A0A087ZVF3	Reticulon-like protein OS=Apis mellifera OX=7460 GN=102656074 PE=4 SV=1	0	FALSE		86.576	34	5	155	5	210	23.4	8.25	22.34		50.78	7.78	66.09	53	4.92		75.13	19.13	4.42	35.76	101.58	56.8	98.21	14.61	0	3		3	2	4	5	1		5	3	3	3	4	3	5	3	1
FALSE	High	Master Protein	A0A087ZVF0	Reticulon-like protein OS=Apis mellifera OX=7460 PE=4 SV=1	0	FALSE		37.702	37	7	12	7	244	28.2	4.67				0					2.06				8.93		14.43	0					1					1				4		4	1
FALSE	High	Master Protein	A0A087ZYK5	RF_PROK_I domain-containing protein OS=Apis mellifera OX=7460 GN=LOC410376 PE=4 SV=1	0.006	FALSE		3.344	7	1	3	1	198	23	9.86	1.63				1.64				1.7									1				1				1
FALSE	High	Master Protein	V5RJ94	Ribonucleoside diphosphate reductase 2 betachain OS=Spiroplasma apis B31 OX=1276258 GN=nrdF PE=4 SV=1	0.007	FALSE		3.121	5	1	1	1	342	39.6	5.16							0																	1
FALSE	High	Master Protein	A0A088AQW4	Ribonucloprotein OS=Apis mellifera OX=7460 GN=102655272 PE=3 SV=1	0	FALSE		6.255	9	1	9	1	127	13.9	7.85	3.02			0	5.65	4.64				0	0	2						1			1	1	1				1	1	1
FALSE	High	Master Protein	A0A088AFB1	Ribos_L4_asso_C domain-containing protein OS=Apis mellifera OX=7460 GN=RpL4 PE=4 SV=1	0	FALSE		140.795	48	20	148	19	429	48.3	11.53	14.91		39.22	0	33.86	31.37	0		75.76			19	18.21	19.59	47.34	2.01	0	5		9	2	9	10	1		17			9	9	8	12	4	1
FALSE	High	Master Protein	A0A086FFP2	Ribose-phosphate pyrophosphokinase OS=Serratia marcescens OX=615 GN=prs PE=3 SV=1	0	FALSE	Bacteria	23.349	25	6	8	6	315	34.2	5.59								14.84																	6
FALSE	High	Master Protein	A0A087ZZ05	Ribosomal protein L15 OS=Apis mellifera OX=7460 GN=RpL15 PE=3 SV=1	0	FALSE		42.143	31	6	46	6	204	23.9	11.6	2.75		23.09		22.6	12.06			12.91			2.36	13.05		2.5			2		3		4	3			4			2	5		1
FALSE	High	Master Protein	X2JFT9	Ribosomal protein L19 OS=Apis mellifera OX=7460 GN=rpl19 PE=2 SV=1	0	FALSE		40.631	28	6	51	6	200	23.6	11.22	8.5		14.8	0	18.77	14.72			19.92			4.28	20.36	4.85	21.67	4.09		2		3	1	3	4			4			2	5	1	5	2
FALSE	High	Master Protein	A0A087ZQ36	Ribosomal_L16 domain-containing protein OS=Apis mellifera OX=7460 GN=RpL10 PE=4 SV=1	0	FALSE		51.797	47	10	47	10	219	25	10.02	0		8.65		7.72	5.25			22.63			2.03	14.21	5.98	24.06	0		1		3		4	2			5			1	6	1	5	2
FALSE	High	Master Protein	A0A088AL09	Ribosomal_L18_c domain-containing protein OS=Apis mellifera OX=7460 GN=RpL5 PE=3 SV=1	0	FALSE		63.931	48	11	50	11	298	34.3	9.69	10.19		14.96		26.5	10.18			28.62			6.15	11.66	4.55	10.54			5		4		7	3			7			2	5	2	4
FALSE	High	Master Protein	A0A088A2E6	Ribosomal_L18e/L15P domain-containing protein OS=Apis mellifera OX=7460 GN=mRpL15 PE=3 SV=1	0	FALSE		12.103	15	3	6	3	293	33.7	9.07					1.77				2.1						2.02							3				2						1
FALSE	High	Master Protein	A0A088AIL2	Ribosomal_L18e/L15P domain-containing protein OS=Apis mellifera OX=7460 GN=RpL27A PE=3 SV=1	0	FALSE		23.22	29	5	26	5	147	16.7	10.54			8.36		7.14	6.88			14.36			0	2.15		15.32					3		2	2			4			1	1		4
FALSE	High	Master Protein	A0A088ABL2	Ribosomal_L2_C domain-containing protein OS=Apis mellifera OX=7460 GN=RpL8 PE=3 SV=1	0	FALSE		69.435	55	14	48	14	257	28.1	10.92	2.03		7.84		10.88	8.11			26.86			4.77	8.61	5.45	21.05	3.68		1		3		4	4			9			2	5	3	6	1
FALSE	High	Master Protein	A0A088AJK1	Ribosomal_L23eN domain-containing protein OS=Apis mellifera OX=7460 GN=RpL23A PE=3 SV=1	0	FALSE		32.906	38	10	53	10	241	26.6	10.73	0		4.08		7.96	5.57			12.62			0	9.99	3.51	20.55	2.05		2		3		7	4			4			3	4	1	7	5
FALSE	High	Master Protein	A0A088ALQ3	Ribosomal_L28e domain-containing protein OS=Apis mellifera OX=7460 GN=RpL28 PE=4 SV=1	0	FALSE		19.271	28	3	24	3	138	15.7	11.31	2.83		6.31	0	2.56	3.65			7.27			4.85	1.75		5.47	0		2		2	1	2	2			2			2	2		1	1
FALSE	High	Master Protein	A0A088A8Q3	Ribosomal_L6e_N domain-containing protein OS=Apis mellifera OX=7460 GN=RpL6 PE=4 SV=1	0	FALSE		67.114	44	13	63	13	274	31.8	10.48	2.42		9.38		8.93	5.68			35.7			0	23.53	3.05	26.14	1.95		1		5		5	2			10			2	9	1	5	2
FALSE	High	Master Protein	A0A088AHA4	Ribosomal_L7Ae domain-containing protein OS=Apis mellifera OX=7460 GN=RpL30 PE=3 SV=1	0	FALSE		19.886	41	3	15	3	114	12.5	9.83	2.59		2.98	0	8.04	2.72			7.01			6.04	3.35			4.51	2.31	1		1	1	2	1			2			2	1			2	1
FALSE	High	Master Protein	A0A088A266	Ribosomal_L7Ae domain-containing protein OS=Apis mellifera OX=7460 GN=RpL7A PE=4 SV=1	0	FALSE		68.265	51	14	76	14	268	30.4	10.61	0		16.58	2.41	17.88	6.4			26.45			0	27.35	9.24	41.31	2.46	2.12	1		4	1	7	5			12			1	8	3	10	3	1
FALSE	High	Master Protein	A0A087ZVW5	Ribosomal_S10 domain-containing protein OS=Apis mellifera OX=7460 GN=LOC409129 PE=4 SV=1	0	FALSE		4.824	7	1	1	1	214	24.7	7.61	2.09																	1
FALSE	High	Master Protein	A0A087ZP70	Ribosomal_S10 domain-containing protein OS=Apis mellifera OX=7460 GN=RpS20 PE=3 SV=1	0	FALSE		33.812	32	3	57	3	121	13.7	9.94	19.15		14.81	2.01	12.97	16.79	1.91	0	8.19	0	2.68	12.37	3.57		21.46	7.87	0	3		2	1	3	2	2	1	1	1	2	2	1		3	2	2
FALSE	High	Master Protein	A0A087ZQ43	Ribosomal_S13_N domain-containing protein OS=Apis mellifera OX=7460 GN=RpS13 PE=3 SV=1	0	FALSE		28.312	41	6	69	6	151	17.2	10.36	6.66		11.73		11.89	17.73			17.35		0	9.58	9.98	2.64	18.93	1.64	0	3		3		4	6			6		1	6	4	2	4	2	1
FALSE	High	Master Protein	A0A088A637	Ribosomal_S17_N domain-containing protein OS=Apis mellifera OX=7460 GN=RpS11 PE=3 SV=1	0	FALSE		34.959	47	8	37	8	155	18.1	10.93	3		9.65		14.35	5.29			16.13			2.94	14.2		19.85	2.53		1		3		5	2			5			1	7		5	1
FALSE	High	Master Protein	A0A088AEQ9	Ribosomal_S7 domain-containing protein OS=Apis mellifera OX=7460 GN=mRpS7 PE=3 SV=1	0.008	FALSE		2.842	4	1	1	1	227	26.8	9.69															2.1																	1
FALSE	High	Master Protein	A0A088A389	Ribosomal_S7 domain-containing protein OS=Apis mellifera OX=7460 GN=RpS5a PE=3 SV=1	0	FALSE		64.754	36	10	105	10	216	24.1	9.45	8.08		19.73	0	21.02	14.94			28.73	0		15.19	11.38	25.76	58.56	0		3		6	4	6	6			7	1		5	7	4	8	1
FALSE	High	Master Protein	A0A087ZU68	RING-type domain-containing protein OS=Apis mellifera OX=7460 GN=LOC550689 PE=4 SV=1	0	FALSE		4.607	6	1	1	1	309	34.4	5.2															2.41																	1
FALSE	High	Master Protein	A0A088A9F4	RING-type domain-containing protein OS=Apis mellifera OX=7460 PE=4 SV=1	0	FALSE		8.006	2	3	3	3	1768	194.8	5.4													2.11																	3
FALSE	High	Master Protein	A0A093SF49	RNA polymerase-binding transcription factor DksA OS=Pectobacterium carotovorum subsp. carotovorum OX=555 GN=dksA PE=3 SV=1	0.005	FALSE	Bacteria	3.659	8	1	1	1	151	17.4	5.11								1.61																	1
FALSE	High	Master Protein	A0A088ANL1	RNase III domain-containing protein OS=Apis mellifera OX=7460 GN=mRpL44 PE=4 SV=1	0	FALSE		8.189	7	1	8	1	313	35.6	8.72			2.3		5.33	2.09			6.07			2.26								1		1	1			1			1
FALSE	High	Master Protein	A0A088A9Z3	RPN13_C domain-containing protein OS=Apis mellifera OX=7460 GN=LOC413299 PE=4 SV=1	0	FALSE		40.085	32	8	29	8	399	43.2	5.63	2.54				4.37	4.18			15.84			4.5		6.32	4.17	0		4				3	2			6			3		4	1	2
FALSE	High	Master Protein	A0A088AIM4	RPN2_C domain-containing protein OS=Apis mellifera OX=7460 PE=4 SV=1	0	FALSE		34.811	25	7	18	7	364	40.8	6.33					6.6				11.79				4.8	5.17	12.02							3				5				3	2	4
FALSE	High	Master Protein	A0A088AS20	RRF domain-containing protein OS=Apis mellifera OX=7460 PE=4 SV=1	0	FALSE		6.647	14	2	3	2	259	30.7	9.23	0					0								2.75				1					1								1
FALSE	High	Master Protein	A0A088A2F5	RRM domain-containing protein OS=Apis mellifera OX=7460 GN=100578161 PE=4 SV=1	0	FALSE		5.206	6	2	2	2	451	52.4	9.36									1.72																	2
FALSE	High	Master Protein	A0A088A8P7	RRM domain-containing protein OS=Apis mellifera OX=7460 GN=413835 PE=4 SV=1	0	FALSE		27.109	26	5	14	5	193	22.5	11.5	1.94		1.75		2.04				5.04	0			4.33	5.5	5.88	2.43		1		1		1				2	1			3	1	2	1
FALSE	High	Master Protein	A0A088AKG6	RRM domain-containing protein OS=Apis mellifera OX=7460 GN=Imp PE=4 SV=1	0	FALSE		38.132	16	6	17	6	576	62.4	8.92	5.35		0		1.66	1.6			1.95				7.71	4.59	6.35	0		2		1		1	1			2				3	2	2	1
FALSE	High	Master Protein	A0A087ZY55	RRM domain-containing protein OS=Apis mellifera OX=7460 GN=LOC409065 PE=4 SV=1	0	FALSE		7.459	5	2	3	2	464	54.5	6.57									2.06			0				0										1			1				1
FALSE	High	Master Protein	A0A088A7J9	RRM domain-containing protein OS=Apis mellifera OX=7460 GN=LOC409486 PE=4 SV=1	0	FALSE		28.107	19	5	7	5	416	43.1	8.56	2.37				2.2									7.05		0		2				1									3		1
FALSE	High	Master Protein	A0A088AM73	RRM domain-containing protein OS=Apis mellifera OX=7460 GN=LOC409862 PE=4 SV=1	0	FALSE		5.888	7	1	1	1	176	20.9	11.74	2.39																	1
FALSE	High	Master Protein	A0A087ZZC6	RRM domain-containing protein OS=Apis mellifera OX=7460 GN=Pabp2 PE=4 SV=1	0	FALSE		12.282	14	2	4	2	228	25.7	5.97									2.45					2.58	6.09											1					1	2
FALSE	High	Master Protein	A0A088A1A3	RRM domain-containing protein OS=Apis mellifera OX=7460 GN=RnpS1 PE=4 SV=1	0.01	FALSE		2.515	2	1	1	1	326	37.2	11.63															1.62																	1
FALSE	High	Master Protein	A0A088A412	RRM domain-containing protein OS=Apis mellifera OX=7460 PE=4 SV=1	0	FALSE		16.774	8	4	5	4	816	89.7	9.29	2.2		0										5.41		2.76			1		1										2		1
FALSE	High	Master Protein	A0A087ZVI1	RRM domain-containing protein OS=Apis mellifera OX=7460 PE=4 SV=1	0.006	FALSE		3.543	10	1	1	1	125	14.7	9.28															1.88																	1
FALSE	High	Master Protein	A0A088ABX8	RRM domain-containing protein OS=Apis mellifera OX=7460 PE=4 SV=1	0	FALSE		16.574	11	4	12	4	484	56.7	5.57					5.2	0			2.86			0			5.81	2.54						3	1			1			2			2	2
FALSE	High	Master Protein	A0A088A1R3	RRM domain-containing protein OS=Apis mellifera OX=7460 PE=4 SV=1	0	FALSE		4.291	5	1	4	1	241	27.9	11.78	0		0		0								2.6					1		1		1								1
FALSE	High	Master Protein	A0A087ZY56	RRM domain-containing protein OS=Apis mellifera OX=7460 PE=4 SV=1	0	FALSE		11.479	21	4	6	4	282	29.5	6.52	0				0	2.24									0			1				1	2									2
FALSE	High	Master Protein	A0A088AH65	RRM domain-containing protein OS=Apis mellifera OX=7460 PE=4 SV=1	0	FALSE		27.455	23	4	12	4	247	26.7	11.06	5.05		3						2.47			0	5.21		8.53	3.8		2		1						1			1	2		2	3
FALSE	High	Master Protein	A0A088A1R1	RRM domain-containing protein OS=Apis mellifera OX=7460 PE=4 SV=1	0	FALSE		6.735	12	2	5	2	163	18.9	8.65									0				4.22		2.38		0									1				2		1		1
FALSE	High	Master Protein	A0A087ZSJ5	RuvB-like helicase OS=Apis mellifera OX=7460 GN=pontin PE=3 SV=1	0	FALSE		15.139	10	3	3	3	456	50	6.76									2.43						3.66	1.7										1						1	1
FALSE	High	Master Protein	A0A088ARN2	RuvB-like helicase OS=Apis mellifera OX=7460 GN=Reptin PE=3 SV=1	0.01	FALSE		2.488	2	1	1	1	462	51.4	5.54																0																	1
FALSE	High	Master Protein	A0A088ANA3	S-(hydroxymethyl)glutathione dehydrogenase OS=Apis mellifera OX=7460 GN=Fdh PE=3 SV=1	0	FALSE		13.04	15	4	9	4	377	40.4	7.28	4.76					2.11		0	2.3		0		0	0				2					1		1	1		1		1	1
FALSE	High	Master Protein	A0A088AB73	S1 motif domain-containing protein OS=Apis mellifera OX=7460 PE=4 SV=1	0	FALSE		7.772	3	2	3	2	747	83.8	8.65					0								0		2.95							1								1		1
FALSE	High	Master Protein	A0A087ZNQ6	S1 motif domain-containing protein OS=Apis mellifera OX=7460 PE=4 SV=1	0	FALSE		10.147	15	3	4	3	282	31.6	4.75	0								2.33				2.31			2.41		1								1				1			1
FALSE	High	Master Protein	A0A088AHT2	S10_plectin domain-containing protein OS=Apis mellifera OX=7460 GN=LOC409552 PE=4 SV=1	0	FALSE		56.957	43	7	83	7	159	17.9	9.83	12.96		35.32	1.89	13.85	29.96	0		34.13	2.22		43.21	1.62		19.45	5.13	0	2		3	2	3	5	1		4	1		7	1		3	2	1
FALSE	High	Master Protein	A0A088AC67	S4 RNA-binding domain-containing protein OS=Apis mellifera OX=7460 GN=RpS9 PE=3 SV=1	0	FALSE		48.684	50	14	112	14	193	22.5	10.74	11.15		22.87	0	22.81	18.42	0		25.76	0		9.42	14.57	9.55	24.25	5.11		6		9	4	11	10	1		10	3		7	7	5	7	5
FALSE	High	Master Protein	A0A087ZQV2	S5 DRBM domain-containing protein OS=Apis mellifera OX=7460 GN=RpS2 PE=3 SV=1	0	FALSE		124.387	58	16	141	16	280	30.3	10.13	23.92		39.91	3.36	52.53	28.25			72.49	0		16.17	13.75	12.33	70.63	2.21		7		10	2	12	10			11	1		5	6	3	10	2
FALSE	High	Master Protein	A0A087ZZ41	SAC domain-containing protein OS=Apis mellifera OX=7460 GN=Sac1 PE=4 SV=1	0	FALSE		13.801	6	2	4	2	584	67.3	8.57									1.65						0											1						1
FALSE	High	Master Protein	A0A088AL97	Sacchrp_dh_NADP domain-containing protein OS=Apis mellifera OX=7460 PE=4 SV=1	0	FALSE		198.982	74	25	312	25	422	47.4	8.37	14.2		144.07	9.6	27.24	58.78			102.92	0	2.43	37.79	39.2	28.94	113.68	24.86	5.13	9		22	8	10	17			19	4	4	14	9	7	19	12	3
FALSE	High	Master Protein	A0A088A327	SAM domain-containing protein OS=Apis mellifera OX=7460 GN=Stim PE=4 SV=1	0	FALSE		10.094	3	2	4	2	687	76.2	5.94					1.81	1.76			1.85						3.41							1	1			1						1
FALSE	High	Master Protein	A0A088A124	SAM domain-containing protein OS=Apis mellifera OX=7460 PE=4 SV=1	0.01	FALSE		2.545	1	1	3	1	1249	140.1	7.85			2.22			0											0			1			1											1
FALSE	High	Master Protein	A0A088AK82	SAM-dependent MTase TRM10-type domain-containing protein OS=Apis mellifera OX=7460 PE=4 SV=1	0	FALSE		9.999	7	2	4	2	387	46.5	9.47	0					1.7			4.58									1					1			2
FALSE	High	Master Protein	A0A088A896	SAP domain-containing protein OS=Apis mellifera OX=7460 GN=LOC551151 PE=4 SV=1	0	FALSE		4.106	6	1	1	1	248	27.9	9.09													2.03																	1
FALSE	High	Master Protein	A0A088AIP8	SCP2 domain-containing protein OS=Apis mellifera OX=7460 GN=LOC552717 PE=4 SV=1	0	FALSE		41.366	35	10	26	10	413	45.2	8.53	0		2.02		0	0			11.5		1.77	1.62	1.91	4.85	9.16	5.76		2		1		2	1			6		1	2	1	2	3	5
FALSE	High	Master Protein	Q7YWB0	Secapin OS=Apis cerana cerana OX=94128 PE=2 SV=1	0.009	FALSE		2.69	10	1	42	1	77	8.7	9.33				28.78			0	1.63			6.72					10.66					1			1	1			1					1
FALSE	High	Master Protein	A0A088AL68	Secapin OS=Apis mellifera OX=7460 GN=LOC406145 PE=4 SV=1	0	FALSE		4.429	22	2	28	2	77	8.7	9.66				5.51			0	0								1.69	30.01				1			1	1								1	2
FALSE	High	Master Protein	A0A087ZN54	Secretory carrier-associated membrane protein OS=Apis mellifera OX=7460 GN=Scamp PE=3 SV=1	0	FALSE		12.833	11	2	3	2	354	39.4	7.25									2.23						7.85											1						2
FALSE	High	Master Protein	A0A088ATJ3	Sema domain-containing protein OS=Apis mellifera OX=7460 PE=4 SV=1	0	FALSE		6.35	1	2	3	2	1915	214.1	6.48					0				2.08				0									1				1				1
FALSE	High	Master Protein	P86905	Sensory neuron membrane protein 1 OS=Apis mellifera OX=7460 PE=3 SV=1	0	FALSE		4.753	7	2	2	2	520	58.1	6.25	0																	2
FALSE	High	Master Protein	A0A088AB82	Serine/threonine protein phosphatase 2A regulatory subunit OS=Apis mellifera OX=7460 PE=3 SV=1	0	FALSE		23.018	16	6	9	6	474	55.4	7.47									0		0			1.76	7.74											1		2			2	4
FALSE	High	Master Protein	A0A088AUP5	Serine/threonine-protein phosphatase OS=Apis mellifera OX=7460 GN=LOC409430 PE=3 SV=1	0	FALSE		9.106	14	3	4	3	329	37.4	6.76	2.3								0							0		2								1							1
FALSE	High	Master Protein	A0A088ADM2	Serine/threonine-protein phosphatase OS=Apis mellifera OX=7460 GN=LOC411046 PE=3 SV=1	0	FALSE		13.575	5	5	8	5	1283	144.8	5.11	0										0			1.79	0	0		1										1			2	1	2
FALSE	High	Master Protein	A0A088A299	Serine/threonine-protein phosphatase OS=Apis mellifera OX=7460 GN=mts PE=3 SV=1	0	FALSE		32.809	20	4	9	4	309	35.4	5.53	2.01			0										8.7	2.66	2.57		1			1										3	1	2
FALSE	High	Master Protein	A0A088AS87	SERPIN domain-containing protein OS=Apis mellifera OX=7460 GN=100577408 PE=3 SV=1	0	FALSE		46.642	22	10	25	10	640	73.1	9.33	0		2.76			6.98	15.79		3.03	0						0	0	1		1			3	9		1	1						2	2
FALSE	High	Master Protein	A0A088ASF2	SERPIN domain-containing protein OS=Apis mellifera OX=7460 GN=serpin-5 PE=3 SV=1	0	FALSE		131.534	54	18	266	18	451	50.7	7.96	50.96	10.12	29.61	22.32	21.33	39.83	11.58	44.64	2.22	47.47	5.43	12.56	25.83	1.69	15.31	12.24	32.67	15	7	10	9	6	14	4	15	1	15	4	7	9	1	5	7	9
FALSE	High	Master Protein	A0A088ABM1	SERPIN domain-containing protein OS=Apis mellifera OX=7460 PE=3 SV=1	0	FALSE		83.561	51	16	144	16	342	38.6	6.43	60.94	0	13.27	7.46	2.53	32.99	1.93	14.84		47.57	0	9.2	7.61		8.16	11.21	10.8	10	1	6	6	4	7	2	8		14	2	6	5		2	6	5
FALSE	High	Master Protein	A0A088AD78	SET domain-containing protein OS=Apis mellifera OX=7460 GN=LOC412862 PE=4 SV=1	0	FALSE		13.074	13	4	4	4	513	57.8	6.37						1.89						0				0							1						1				2
FALSE	High	Master Protein	A0A087ZSJ1	SGL domain-containing protein OS=Apis mellifera OX=7460 PE=4 SV=1	0	FALSE		6.09	36	2	2	2	94	10.2	8.69								0																	2
FALSE	High	Master Protein	A0A087ZSJ0	SGL domain-containing protein OS=Apis mellifera OX=7460 PE=4 SV=1	0	FALSE		9.37	38	3	7	3	99	11.6	6.35		0						0								5.51	2.64		1						1								3	2
FALSE	High	Master Protein	A0A087ZSJ2	SGL domain-containing protein OS=Apis mellifera OX=7460 PE=4 SV=1	0	FALSE		11.617	13	2	3	2	313	34.2	5.48								0								0									2								1
FALSE	High	Master Protein	A0A088ALL8	SH3 domain-containing protein OS=Apis mellifera OX=7460 GN=LOC408693 PE=4 SV=1	0	FALSE		120.528	37	22	57	22	878	99.8	6.09	2.91		23.58			2.12	0		3.79				18.75	9.62	39.62	1.94	0	1		7			1	3		2				9	4	12	3	5
FALSE	High	Master Protein	A0A088A3R8	SHSP domain-containing protein OS=Apis mellifera OX=7460 GN=724449 PE=3 SV=1	0	FALSE		43.345	63	8	19	8	237	27.7	7.47	4.06		0	2.53	4.01	6.27			16.58	2.27			2.64	3.56		2.65		2		1	1	2	2			5	1			1	2		1
FALSE	High	Master Protein	A0A088APK1	SHSP domain-containing protein OS=Apis mellifera OX=7460 GN=LOC408875 PE=3 SV=1	0	FALSE		54.144	50	6	200	6	184	20.5	6.96	31.65	6.69	17.41	13.65	22.24	26.37	15.02	22.25	29.32	16.32	15.55	17.38	36.64	88.79	35.2	32.57	5.46	4	2	3	4	3	3	3	3	5	3	4	3	2	5	5	4	3
FALSE	High	Master Protein	A0A088AE90	SHSP domain-containing protein OS=Apis mellifera OX=7460 GN=LOC410857 PE=3 SV=1	0	FALSE		178.581	75	14	729	14	191	22	6.23	92.16		161.86	2.06	60.95	201.24	17.68	4.48	99.14	21.15	65	163.12	283.89	91.46	202.56	139.06	4.28	10		12	2	8	11	6	5	11	7	10	13	12	7	11	12	1
FALSE	High	Master Protein	A0A088A7Z5	SHSP domain-containing protein OS=Apis mellifera OX=7460 GN=LOC412197 PE=3 SV=1	0	FALSE		99.713	70	13	115	13	174	20.4	6.43	10.28		28.43	0	11.39	33.35	38.03	0	60.14	2.26	2.1	13.97	7.35	21.08	19.8	4.24		4		7	1	5	9	7	1	10	4	4	5	2	4	4	2
FALSE	High	Master Protein	A0A088A3R5	SHSP domain-containing protein OS=Apis mellifera OX=7460 GN=LOC724274 PE=3 SV=1	0	FALSE		68.848	72	12	81	12	194	22.5	6.24	2.05		2.64	28.31	0	8.77			65.46	0	0	4.99	4.7		18.88	0		2		2	8	1	4			10	1	3	4	2		5	4
FALSE	High	Master Protein	A0A088A3R7	SHSP domain-containing protein OS=Apis mellifera OX=7460 GN=LOC724405 PE=3 SV=1	0	FALSE		41.17	50	7	24	7	193	22.4	5.5			0	3.2		2.22			2.15		1.73	0	2.82		5.67	0				1	4		4			4		1	1	3		2	1
FALSE	High	Master Protein	A0A088A3R9	SHSP domain-containing protein OS=Apis mellifera OX=7460 GN=LOC724488 PE=3 SV=1	0	FALSE		116.517	63	9	142	9	196	23	5.54	19.57		27.67		8.2	36.77	7.29	2.17	91.77	13.06	9.51	61.67	11.22	20.22	29.92	19.57		4		6		4	6	6	3	9	7	5	8	2	4	3	4
FALSE	High	Master Protein	A0A088A3R2	SHSP domain-containing protein OS=Apis mellifera OX=7460 PE=3 SV=1	0	FALSE		80.426	72	12	66	12	185	21.8	6.55				5.73		4.86			44.22	2	4.61		4.14	4.27	43.35	18.41					3		3			9	1	3		2	2	8	8
FALSE	High	Master Protein	A0A088A3R6	SHSP domain-containing protein OS=Apis mellifera OX=7460 PE=3 SV=1	0	FALSE		9.719	26	3	3	3	209	24.2	5.27									0	0						0										1	1						1
FALSE	High	Master Protein	A0A088AGC3	Sidoreflexin OS=Apis mellifera OX=7460 GN=LOC408539 PE=3 SV=1	0	FALSE		14.92	18	4	5	4	321	36.2	9.16				8.23																	4
FALSE	High	Master Protein	A0A088A4I8	Sidoreflexin OS=Apis mellifera OX=7460 GN=LOC550915 PE=3 SV=1	0	FALSE		57.976	40	10	36	10	326	36.8	9.1	0		10.66	6.21	12.4	5.44			10.9			0			11.95			2		4	7	4	2			4			1			4
FALSE	High	Master Protein	A0A088A934	Signal peptidase complex catalytic subunit SEC11 OS=Apis mellifera OX=7460 GN=Spase18-21 PE=3 SV=1	0	FALSE		21.22	19	4	19	4	180	20.7	9.13			8.88	1.93	7.16	4.71			7.32	0					6.21	1.68	0			2	1	3	2			2	2					2	1	1
FALSE	High	Master Protein	A0A088AR84	Signal recognition particle subunit SRP68 OS=Apis mellifera OX=7460 GN=Srp68 PE=3 SV=1	0	FALSE		4.13	3	1	1	1	576	66.2	8.47									0																	1
FALSE	High	Master Protein	A0A088A4L7	Signal recognition particle subunit SRP72 OS=Apis mellifera OX=7460 PE=3 SV=1	0	FALSE		14.153	10	4	5	4	630	71.4	8.7					0				0				0	0	2.41							1				1				1	1	1
FALSE	High	Master Protein	A0A088AEX7	Signal transducer and activator of transcription OS=Apis mellifera OX=7460 GN=STAT92E-like PE=3 SV=1	0	FALSE		10.89	5	2	7	2	824	92.8	6.79	0		2.29			3.04			3.37			0		0				1		1			1			1			1		1
FALSE	High	Master Protein	A0A1Q4P0U7	Single-stranded DNA-binding protein OS=Serratia marcescens OX=615 GN=BHU62_11030 PE=3 SV=1	0	FALSE	Bacteria	5.47	8	1	1	1	176	18.8	5.58								2.45																	1
FALSE	High	Master Protein	A0A093T0G8	Site-determining protein OS=Pectobacterium carotovorum subsp. carotovorum OX=555 GN=KP17_01685 PE=3 SV=1	0.007	FALSE	Bacteria	3.131	5	1	1	1	270	29.6	5.19								1.9																	1
FALSE	High	Master Protein	A0A088AF01	Small nuclear ribonucleoprotein G OS=Apis mellifera OX=7460 GN=SmG PE=3 SV=1	0.008	FALSE		3.063	17	1	1	1	76	8.6	8.78					2.27																	1
FALSE	High	Master Protein	A0A088A041	Small nuclear ribonucleoprotein Sm D1 OS=Apis mellifera OX=7460 GN=LOC552559 PE=3 SV=1	0	FALSE		5.936	16	1	3	1	123	13.6	11.44			0		0															1		1
FALSE	High	Master Protein	A0A087ZMS5	Small nuclear ribonucleoprotein Sm D2 OS=Apis mellifera OX=7460 PE=3 SV=1	0	FALSE		8.703	17	2	4	2	110	12.5	9.99					2.03					0				0	2.01							1					1				1	1
FALSE	High	Master Protein	A0A088A2F9	Small nuclear ribonucleoprotein-associated protein OS=Apis mellifera OX=7460 GN=Smb PE=3 SV=1	0.001	FALSE		3.997	4	1	3	1	217	22.7	11.08	1.81				2.11	2												1				1	1
FALSE	High	Master Protein	H9KID5	Small ubiquitin-related modifier OS=Apis mellifera OX=7460 GN=smt3 PE=3 SV=1	0	FALSE		9.805	32	3	14	3	93	10.4	5.48	3.05					4.46		1.76		0	0	2.26	2.39			3.61		2					2		1		1	1	1	1			1
FALSE	High	Master Protein	A0A087ZZ04	SMB domain-containing protein OS=Apis mellifera OX=7460 GN=LOC409789 PE=3 SV=1	0	FALSE		262.585	64	26	702	26	439	50.2	7.31	88.62		198.87	63.21	152.1	180.54	14.88		134.21	67.28		102.14	150.73	57.01	201.93	19.35		17		23	18	23	22	13		21	17		22	15	13	16	6
FALSE	High	Master Protein	A0A087ZTA6	Sodium/potassium-transporting ATPase subunit alpha OS=Apis mellifera OX=7460 PE=3 SV=1	0	FALSE		456.186	53	50	750	50	1035	115.2	5.81	47.22		189.35	439.72	188.64	166.89	2.43		168.55	56.45		39.43	158.32	107.38	249.44	29.53	3.35	18		35	48	29	31	1		31	28		16	33	23	33	21	6
FALSE	High	Master Protein	A0A088ATA4	Sorting nexin OS=Apis mellifera OX=7460 PE=3 SV=1	0	FALSE		9.458	5	2	8	2	404	46.8	6.14	0		2.57			1.77						0	1.79		2.81			1		1			1						1	1		1
FALSE	High	Master Protein	A0A088AM17	Spaetzle domain-containing protein OS=Apis mellifera OX=7460 GN=100577844 PE=4 SV=1	0	FALSE		11.703	11	2	4	2	258	29.9	6.92								2.02									0								2									1
FALSE	High	Master Protein	A0A088ALU3	Spaetzle domain-containing protein OS=Apis mellifera OX=7460 PE=4 SV=1	0	FALSE		34.612	26	6	28	6	323	36.8	8.51	2.22		27.03			7.4							6.21		10.89			2		5			3							2		3
FALSE	High	Master Protein	A0A087ZWQ6	SPARC_Ca_bdg domain-containing protein OS=Apis mellifera OX=7460 GN=BM-40-SPARC PE=4 SV=1	0	FALSE		12.483	15	4	11	4	304	35.3	5.25				0					1.89			0		0	2.13	0					2					2			1		2	1	1
FALSE	High	Master Protein	A0A088ANZ7	Spectrin beta chain OS=Apis mellifera OX=7460 GN=beta-Spec PE=3 SV=1	0	FALSE		1318.65	70	139	1641	139	2401	277.6	5.71	152.72		485.96	168.23	347.32	494.66	0		615.84	26.81		117.98	483.21	190.98	914.01	81.94		53		91	62	81	96	8		103	31		52	87	52	103	49
FALSE	High	Master Protein	A0A093V4J2	S-ribosylhomocysteine lyase OS=Pectobacterium carotovorum subsp. carotovorum OX=555 GN=luxS PE=3 SV=1	0	FALSE	Bacteria	8.877	17	2	2	2	171	19.3	5.53								1.67																	2
FALSE	High	Master Protein	A0A088AP45	SRP54 domain-containing protein OS=Apis mellifera OX=7460 GN=Gtp-bp PE=4 SV=1	0	FALSE		8.799	6	3	4	3	614	69.3	8.5									0						2.28											1						2
FALSE	High	Master Protein	A0A087ZWG1	SSD domain-containing protein OS=Apis mellifera OX=7460 PE=4 SV=1	0	FALSE		38.562	7	8	11	8	1442	161.6	6.89			10.24										1.96		14.36					4										2		5
FALSE	High	Master Protein	A0A087ZQD4	Staphylococcal nuclease domain-containing protein OS=Apis mellifera OX=7460 GN=Tudor-SN PE=4 SV=1	0	FALSE		86.177	26	17	36	17	892	100.9	7.96	9.46					1.88			12.18		0		4.94	12.58	19.41	3.7		4					1			5		4		2	6	6	5
FALSE	High	Master Protein	A0A087ZRM4	STI1 domain-containing protein OS=Apis mellifera OX=7460 PE=4 SV=1	0	FALSE		10.823	26	2	3	2	151	16.9	8.28	0												2.39	1.89				1												1	1
FALSE	High	Master Protein	A0A087ZTD1	Str_synth domain-containing protein OS=Apis mellifera OX=7460 PE=4 SV=1	0	FALSE		51.78	25	11	88	11	564	63.1	9.09	3.23		24.94		6.43	9.04			33.74			2.39	9.13	9.41	22.7	2.4	0	4		8		7	5			8			4	6	4	7	5	1
FALSE	High	Master Protein	A5A5E4	Structural cuticle protein (Fragment) OS=Apis mellifera OX=7460 PE=2 SV=1	0	FALSE		104.786	82	4	1347	4	138	14.6	4.41	25.4		568.83	122	106.18	380.59	352.12	9.88	56.11	12.18		269.66	605.54	311.46	556.85	129.82	194.67	1		3	2	3	2	2	1	2	1		2	2	1	2	2	4
FALSE	High	Master Protein	A0A088A3W0	Succinate dehydrogenase [ubiquinone] cytochrome b small subunit OS=Apis mellifera OX=7460 GN=LOC725566 PE=3 SV=1	0	FALSE		8.216	16	4	15	4	201	22.3	9.32	0				3.42	0			1.66			0	0	0	3.41			1				3	2			1			1	1	1	2
FALSE	High	Master Protein	A0A088A6T4	Succinate dehydrogenase [ubiquinone] flavoprotein subunit, mitochondrial OS=Apis mellifera OX=7460 GN=SdhA PE=3 SV=1	0	FALSE		208.542	52	22	148	22	661	72.4	7.18	22.01		25.1	22.73	71.78	48.95	7.22		60.25	0	0	22.78	22.35	19.87	63.99	3.16		5		6	5	13	11	5		13	1	1	8	4	4	12	3
FALSE	High	Master Protein	A0A088AQ13	Succinate dehydrogenase [ubiquinone] iron-sulfur subunit, mitochondrial OS=Apis mellifera OX=7460 GN=LOC551169 PE=3 SV=1	0	FALSE		62.379	52	12	122	12	254	29	8.78	10.91		7.23	4.19	53.74	29.98	3.76		34.37		0	14.42	16.35	12.35	27.16	1.7		6		4	7	12	10	7		9		1	5	6	4	8	1
FALSE	High	Master Protein	A0A0F6KX73	Succinate dehydrogenase flavoprotein subunit OS=Serratia marcescens OX=615 GN=sdhA PE=3 SV=1	0	FALSE	Bacteria	29.66	19	7	9	7	588	64.4	6.18								10.88																	7
FALSE	High	Master Protein	A0A093V9L8	Succinate dehydrogenase iron-sulfur subunit OS=Pectobacterium carotovorum subsp. carotovorum OX=555 GN=sdhB PE=3 SV=1	0	FALSE	Bacteria	9.306	13	3	3	3	238	26.7	7.21								1.81																	3
FALSE	High	Master Protein	A0A088ADV3	Succinate--CoA ligase [ADP/GDP-forming] subunit alpha, mitochondrial OS=Apis mellifera OX=7460 GN=Scsalpha PE=3 SV=1	0	FALSE		50.851	31	10	53	10	340	36	9	22.14		2.4		3.27	11.95		1.98	9.08	0	7.43	6.16	14.13	12.14	10.98	0		5		2		1	6		3	3	2	6	2	6	3	4	1
FALSE	High	Master Protein	A0A080UXF7	Succinate--CoA ligase [ADP-forming] subunit alpha OS=Serratia marcescens OX=615 GN=sucD PE=3 SV=1	0	FALSE	Bacteria	10.979	12	3	6	3	290	29.8	7.08								9.18			0														3			1
FALSE	High	Master Protein	A0A086FM50	Succinate--CoA ligase [ADP-forming] subunit beta OS=Serratia marcescens OX=615 GN=sucC PE=3 SV=1	0	FALSE	Bacteria	12.672	9	3	7	3	388	41.4	5.34								8.43			1.81														3			1
FALSE	High	Master Protein	A0A088ARY0	Succinate--CoA ligase [ADP-forming] subunit beta, mitochondrial OS=Apis mellifera OX=7460 PE=3 SV=1	0	FALSE		67.123	38	13	85	13	448	48.6	7.33	21.48		16.6	3.81	1.85	9.49		4.16	7.39	4.1	30.15	12.32	25.52	10.31	14.16	8.46		7		8	3	2	4		2	3	3	10	4	7	4	5	3
FALSE	High	Master Protein	A0A087ZV66	SUI1 domain-containing protein OS=Apis mellifera OX=7460 GN=102654691 PE=4 SV=1	0	FALSE		8.266	27	3	4	3	110	12.4	6.77	2.5							0									2.37	1							2									1
FALSE	High	Master Protein	A0A088AUJ3	Sulfatase domain-containing protein OS=Apis mellifera OX=7460 GN=LOC552073 PE=4 SV=1	0	FALSE		4.332	2	1	2	1	546	61.1	6.89																1.98	0																1	1
FALSE	High	Master Protein	A0A087ZZX7	Sulfatase domain-containing protein OS=Apis mellifera OX=7460 PE=4 SV=1	0	FALSE		38.775	23	9	27	9	528	60.1	7.84		0		1.73	10.48	7.56			1.8	13.24			5.93		4.97				1		2	3	3			2	7			3		1
FALSE	High	Master Protein	A0A088A700	SUN domain-containing protein OS=Apis mellifera OX=7460 PE=4 SV=1	0	FALSE		10.877	4	2	2	2	737	86.7	8.29			2.26						2.16											1						1
FALSE	High	Master Protein	Q7YXM6	Superoxide dismutase [Cu-Zn] OS=Apis mellifera ligustica OX=7469 GN=Sod1 PE=2 SV=1	0	FALSE		54.905	66	8	50	8	152	15.6	6.71			0	1.78		8.09		5.01	13.72		2.21	0		39.65		12.77	13.64			1	2		4		2	5		1	2		5		4	4
FALSE	High	Master Protein	A0A1B1JID1	Superoxide dismutase [Cu-Zn] OS=Apis mellifera OX=7460 PE=2 SV=1	0	FALSE		10.012	23	3	8	3	177	18.9	6.86																2.05	0																3	2
FALSE	High	Master Protein	A0A088A1K0	Superoxide dismutase OS=Apis mellifera OX=7460 GN=Sod2 PE=3 SV=1	0	FALSE		31.118	32	5	28	5	218	24.5	9.04	4.33		3.54			7.75			9.08			5.19	6.7	16.55		1.66		2		1			3			3			2	4	3		2
FALSE	High	Master Protein	A0A2G5S816	Superoxide dismutase OS=Serratia marcescens OX=615 GN=CS366_06715 PE=3 SV=1	0.01	FALSE	Bacteria	2.445	5	1	3	1	206	23.3	6.74								0			1.71														1			1
FALSE	High	Master Protein	V5T7A2	Surface layer protein OS=Lactobacillus helsingborgensis OX=1218494 GN=JF73_14730 PE=4 SV=1	0	FALSE		5.926	4	2	2	1	593	61.9	9.19	0																2.21	1																1
FALSE	High	Master Protein	V5T8V6	Surface layer protein OS=Lactobacillus kimbladii OX=1218506 GN=JF75_16750 PE=4 SV=1	0	FALSE		7.58	6	2	2	1	603	63.1	9.36	1.99																2.21	1																1
FALSE	High	Master Protein	A0A088APR8	SVWC domain-containing protein OS=Apis mellifera OX=7460 GN=LOC411622 PE=4 SV=1	0	FALSE		14.571	28	4	14	4	152	16.9	4.91	2.68							4.96									1.66	3							2									3
FALSE	High	Master Protein	A0A088AFD4	SWIB domain-containing protein OS=Apis mellifera OX=7460 GN=LOC408520 PE=4 SV=1	0	FALSE		54.594	26	6	93	6	261	29.2	7.83	35.23	0	21.72	0	18.58	10.52		2.13	10.09	5.79	10.85	23.61	17.2	13.02	32.13	12.98	0	6	2	3	1	3	3		2	2	2	4	5	3	2	4	4	1
FALSE	High	Master Protein	A0A087ZPF4	Synapsin_C domain-containing protein OS=Apis mellifera OX=7460 PE=4 SV=1	0	FALSE		29.54	24	5	8	5	305	32.7	6.62				13.08																	5
FALSE	High	Master Protein	A0A088A062	Synaptosomal-associated protein OS=Apis mellifera OX=7460 PE=3 SV=1	0	FALSE		28.908	29	3	8	3	162	18.1	4.89				15.33	1.99										3.27						3	1										1
FALSE	High	Master Protein	C0K3M9	Synaptotagmin I isoform A OS=Apis mellifera OX=7460 GN=sytI PE=2 SV=1	0	FALSE		25.189	21	8	15	8	434	48.8	5.67				18.42																	8
FALSE	High	Master Protein	Q5XUU6	Take-out-like carrier protein JHBP-1 OS=Apis mellifera OX=7460 PE=2 SV=1	0	FALSE		195.208	67	22	609	22	253	29.2	8.32	165.83	8.44	81.04	179.45	17.99	61.47	2.2	109.81	4.13	52.09	29.02	47.92	53.09	28.75	191.67	55.34	86.16	20	6	16	21	5	14	3	17	3	14	10	12	11	7	15	14	15
FALSE	High	Master Protein	A0A088AVZ9	T-complex protein 1 subunit alpha OS=Apis mellifera OX=7460 GN=LOC409134 PE=3 SV=1	0	FALSE		91.682	39	17	51	17	557	59.9	5.91	5.33			2.09	3.43	2.39			14.14		2.31		9.12	8.39	27.17	10.86		5			1	3	2			5		1		7	4	7	9
FALSE	High	Master Protein	A0A088AHM7	T-complex protein 1 subunit delta OS=Apis mellifera OX=7460 GN=LOC551275 PE=3 SV=1	0	FALSE		77.804	29	11	62	11	534	57.3	7.42	10.07		3.03	1.68	4.41	5			28		0		5	11.55	22.25	2.11		4		1	1	5	4			5		3		4	5	5	1
FALSE	High	Master Protein	A0A087ZUG4	T-complex protein 1 subunit eta OS=Apis mellifera OX=7460 GN=Tcp-1eta PE=3 SV=1	0	FALSE		91.776	46	17	42	17	542	59.9	6.42	5.62		2.77		3.54				19.97		0		10.8	13.96	19.52	4.09		2		2		2				9		1		4	4	7	3
FALSE	High	Master Protein	A0A088A3C0	T-complex protein 1 subunit gamma OS=Apis mellifera OX=7460 GN=Cctgamma PE=3 SV=1	0	FALSE		95.28	39	17	72	17	550	61	6.57	18.67			3.65	8.2	8.24		0	30.43		2.47	3.34	9.97	22.68	28.77	7.26		5			2	2	2		1	10		4	1	6	9	10	6
FALSE	High	Master Protein	A0A087ZVC8	TCTP domain-containing protein OS=Apis mellifera OX=7460 GN=Tctp PE=3 SV=1	0	FALSE		33.557	59	7	34	7	172	19.8	4.7	4.11			0	1.98	1.62		1.82		1.84	1.74	3.89		11.39		2.29	3.8	2			1	2	2		3		1	1	2		5		5	3
FALSE	High	Master Protein	A0A088AV46	Tetraspanin OS=Apis mellifera OX=7460 GN=102656585 PE=3 SV=1	0	FALSE		18.157	17	4	17	4	264	29.3	7.33	0		7.45	1.98		4.56			2.2	0		1.67	9.73		2.32			1		3	1		2			1	1		1	2		1
FALSE	High	Master Protein	A0A088AUG1	Tetraspanin OS=Apis mellifera OX=7460 GN=Tspan13 PE=3 SV=1	0	FALSE		10.77	12	3	29	3	238	26.2	7.72	0		2.11	0	1.68	0			2.06	0		0	5.63		4.3	0		1		1	2	2	1			1	2		1	2		2	1
FALSE	High	Master Protein	A0A088ASL1	Tetraspanin OS=Apis mellifera OX=7460 GN=Tspan9 PE=3 SV=1	0	FALSE		19.145	22	3	6	3	267	28.5	5.05					3.41	3.74			8.17	0			1.66									1	1			2	1			1
FALSE	High	Master Protein	Q9NB07	Tetraspanin OS=Apis mellifera OX=7460 PE=2 SV=1	0	FALSE		11.369	10	3	24	3	232	25.3	6.7	1.74		6.09		6.3				6.3	2.07		3.28		1.89	4.35	0		2		2		3				3	1		1		1	1	1
FALSE	High	Master Protein	A0A088AKR6	TGc domain-containing protein OS=Apis mellifera OX=7460 GN=LOC409425 PE=4 SV=1	0	FALSE		144.41	51	23	130	23	713	80.6	5.01	27.77	4.98	13.5	0	26.3	7.06		1.8	32.81	18.08	0	5.37	14.43	28.12	48.75	7.44	6.43	12	7	4	2	10	2		4	12	11	3	2	8	9	13	4	4
FALSE	High	Master Protein	A0A087ZQT4	TGS domain-containing protein OS=Apis mellifera OX=7460 GN=100576663 PE=4 SV=1	0	FALSE		10.507	10	3	3	3	329	37.5	8.66									0						5.03											1						2
FALSE	High	Master Protein	A0A087ZSW3	Thioredoxin domain-containing protein OS=Apis mellifera OX=7460 GN=726314 PE=4 SV=1	0	FALSE		9.411	11	3	7	3	285	33.1	8.63					3.99							1.98	1.7	2.28	2.62							3							1	1	1	1
FALSE	High	Master Protein	A0A088AS52	Thioredoxin domain-containing protein OS=Apis mellifera OX=7460 GN=LOC411255 PE=4 SV=1	0	FALSE		63.75	48	11	48	11	296	34.2	6.27	6.22		17.1	1.77	9.72	4.7			28.27	0		4.13	4.4	4.78	7.97	0		2		6	2	4	3			7	2		2	3	2	3	1
FALSE	High	Master Protein	A0A087ZY71	Thioredoxin domain-containing protein OS=Apis mellifera OX=7460 GN=LOC411391 PE=4 SV=1	0	FALSE		8.175	10	3	4	3	268	31.1	9.22			0						1.67											2						2
FALSE	High	Master Protein	A0A087ZND2	Thioredoxin domain-containing protein OS=Apis mellifera OX=7460 GN=Tpx-1 PE=4 SV=1	0	FALSE		92.838	71	14	193	13	194	21.8	5.97	61.88	4.54	9.14	31.05	24.54	32.73	7.8	28.55	18.22	24.5	19.67	27.46	17.95	23.9	19.48	41.16	19.96	9	3	2	7	7	6	5	8	5	7	8	7	8	7	4	10	7
FALSE	High	Master Protein	A0A087ZRJ5	Thioredoxin domain-containing protein OS=Apis mellifera OX=7460 GN=Tpx-4 PE=4 SV=1	0	FALSE		178.948	66	15	698	15	220	25.1	6.34	136.01	16.15	117.59	57.6	40.74	102.07	7.16	91.36	84.28	39.55	80.68	83.4	251.67	181.12	134.04	168.73	26.13	14	4	14	11	10	13	5	13	12	11	13	14	15	12	13	14	9
FALSE	High	Master Protein	A0A088AKM8	Thioredoxin domain-containing protein OS=Apis mellifera OX=7460 GN=Tpx-5 PE=4 SV=1	0	FALSE		18.584	37	6	15	6	220	24.9	5.48	4.55							0			2.29		1.66			0	0	3							2			4		1			2	1
FALSE	High	Master Protein	A0A088AA01	Thioredoxin domain-containing protein OS=Apis mellifera OX=7460 GN=Trx1-like3 PE=4 SV=1	0	FALSE		7.408	6	2	5	2	427	49.3	5.8	1.67															0		2															2
FALSE	High	Master Protein	A0A088ABX7	Thioredoxin domain-containing protein OS=Apis mellifera OX=7460 PE=4 SV=1	0	FALSE		48.063	30	7	60	7	291	33.4	6.28	3.13		12.04	4.2	12.98	18.33			32.52	0		13.96	3.06	2.64	18.32	0		1		4	2	5	6			7	2		7	1	1	4	1
FALSE	High	Master Protein	A0A088AM69	Thioredoxin OS=Apis mellifera OX=7460 GN=Trx-1 PE=3 SV=1	0.01	FALSE		2.5	12	1	1	1	136	15.2	8.43												0																	1
FALSE	High	Master Protein	A0A088AAY9	Thioredoxin OS=Apis mellifera OX=7460 GN=Trx-2 PE=3 SV=1	0	FALSE		39.649	51	4	59	4	105	12	4.92	5.46		1.71	4.74	2.7	8.07		13.93	3.43	2.46	4.03	11.07		22.07	2.05	15.78	2.34	2		1	2	1	3		4	1	3	2	2		4	1	3	2
FALSE	High	Master Protein	A0A0M3UJN4	Thioredoxin OS=Serratia marcescens OX=615 GN=trxA PE=3 SV=1	0.009	FALSE	Bacteria	2.624	8	1	4	1	108	11.8	5.01								3.62			1.62														1			1
FALSE	High	Master Protein	Q7YXM3	Thioredoxin peroxidase OS=Apis mellifera ligustica OX=7469 GN=Tpx-3 PE=2 SV=1	0	FALSE		34.316	42	8	39	8	242	27.2	8.82	12.8			2.18	8.38	15.61				0	2.21	5.13	3.44	8.63	3.97	9.58	0	4			3	3	5				1	3	2	2	3	1	5	1
FALSE	High	Master Protein	Q7YXM4	Thioredoxin reductase OS=Apis mellifera ligustica OX=7469 GN=Trxr-1 PE=2 SV=1	0	FALSE		29.139	18	6	19	6	485	53.2	7.33	2.76		0	4.82		2.84		1.96	2.86			2.18		6.89		10.38	1.84	1		1	2		1		2	1			1		3		3	2
FALSE	High	Master Protein	A0A088ARY2	TIP120 domain-containing protein OS=Apis mellifera OX=7460 GN=LOC409918 PE=4 SV=1	0	FALSE		42.008	10	9	16	9	1235	138.7	5.74	0					2			17.65					0	2.78			1					2			8					2	1
FALSE	High	Master Protein	A0A088AIS7	TLC domain-containing protein OS=Apis mellifera OX=7460 PE=4 SV=1	0.01	FALSE		2.559	3	1	1	1	306	36.4	9.11															1.8																	1
FALSE	High	Master Protein	A0A088AQ11	TOG domain-containing protein OS=Apis mellifera OX=7460 GN=LOC551331 PE=4 SV=1	0	FALSE		5.422	2	2	2	2	1315	147.6	7.01									2.78						0											1						1
FALSE	High	Master Protein	A0A087ZRD4	TOG domain-containing protein OS=Apis mellifera OX=7460 PE=4 SV=1	0	FALSE		4.395	3	2	2	2	1069	119.8	4.74									0							0										1							1
FALSE	High	Master Protein	A0A088ARK1	TPR_MLP1_2 domain-containing protein OS=Apis mellifera OX=7460 PE=4 SV=1	0	FALSE		35.704	4	6	8	6	2314	262.1	5.06									2.95				1.81	2.79	14.66											1				1	1	5
FALSE	High	Master Protein	A0A087ZYR8	TPR_REGION domain-containing protein OS=Apis mellifera OX=7460 GN=102656934 PE=4 SV=1	0	FALSE		42.589	28	11	30	11	539	61.5	6.81	9.09			0	1.64	2.7					0	0	1.64	10.73	2.52	1.9		3			1	1	1					4	1	3	5	1	6
FALSE	High	Master Protein	A0A088ATH4	TPR_REGION domain-containing protein OS=Apis mellifera OX=7460 GN=LOC411882 PE=4 SV=1	0	FALSE		4.643	8	2	2	2	289	33.8	6.99			1.84												0					1												1
FALSE	High	Master Protein	A0A088A7V2	TPR_REGION domain-containing protein OS=Apis mellifera OX=7460 GN=Sgt PE=4 SV=1	0	FALSE		9.292	8	2	5	2	299	32.8	5.17	1.7													3.01		0		1													1		2
FALSE	High	Master Protein	A0A088A423	TPR_REGION domain-containing protein OS=Apis mellifera OX=7460 GN=Tom70 PE=4 SV=1	0	FALSE		7.045	2	1	1	1	576	65.3	6.74															3.54																	1
FALSE	High	Master Protein	A0A088ASE7	TPR_REGION domain-containing protein OS=Apis mellifera OX=7460 PE=4 SV=1	0	FALSE		32.701	8	7	23	7	1006	115.4	7.27	6.95		0	1.69		0		4.5	0	0	4.03		6.34		3.6	5.15	1.76	3		1	1		1		3	1	1	2		3		1	3	1
FALSE	High	Master Protein	A0A088AGS1	TPR_REGION domain-containing protein OS=Apis mellifera OX=7460 PE=4 SV=1	0	FALSE		36.328	10	7	12	7	1028	117.8	9.99	1.71								6.97				2.8		13	0		1								3				2		3	1
FALSE	High	Master Protein	A0A087ZRM3	TPR_REGION domain-containing protein OS=Apis mellifera OX=7460 PE=4 SV=1	0	FALSE		18.304	27	5	8	5	243	27.4	4.5	4.57									0	0	0		0				3									1	1	1		1
FALSE	High	Master Protein	A0A088AKC0	TPR_REGION domain-containing protein OS=Apis mellifera OX=7460 PE=4 SV=1	0	FALSE		7.488	2	2	2	2	961	108.6	6.99									2.42																	2
FALSE	High	Master Protein	A0A087ZPV0	Transaldolase OS=Apis mellifera OX=7460 PE=3 SV=1	0	FALSE		45.093	39	12	59	12	332	37.2	8.03	18.97			0	0	3.94	0	4.11	3.78		5.59	2	4.33	2.38	6.79	19.27	0	7			2	1	3	1	6	3		6	2	2	1	3	8	2
FALSE	High	Master Protein	A0A093S5X4	Transaldolase OS=Pectobacterium carotovorum subsp. carotovorum OX=555 GN=tal PE=3 SV=1	0	FALSE	Bacteria	20.158	24	5	8	5	317	35.3	5.22								12.3																	5
FALSE	High	Master Protein	A0A088A2T5	Transcription factor BTF3 OS=Apis mellifera OX=7460 PE=3 SV=1	0	FALSE		27.53	53	5	21	5	156	16.9	8.1	23.18			0	9.02	8.73		2.32	2			3.65						5			1	3	3		1	1			2
FALSE	High	Master Protein	A0A093SJR3	Transcription termination/antitermination protein NusG OS=Pectobacterium carotovorum subsp. carotovorum OX=555 GN=nusG PE=3 SV=1	0.006	FALSE	Bacteria	3.348	10	2	2	2	181	20.6	6.09								1.75																	2
FALSE	High	Master Protein	Q86PH6	Transferrin OS=Apis mellifera OX=7460 GN=trf PE=2 SV=1	0	FALSE		352.855	68	41	485	41	712	78.6	7.06	302.88	0		22.54	65.97	19.59	19.44	182.74		136.89	4.97	33.34	4.76		2.79	27.49	127.87	37	3		8	19	8	12	37		29	4	13	6		1	13	26
FALSE	High	Master Protein	A0A088A4K4	Transferrin OS=Apis mellifera OX=7460 PE=3 SV=1	0	FALSE		14.389	6	3	3	3	702	80.5	6.43									2.69						2.62											1						2
FALSE	High	Master Protein	A0A088AJ47	Transgelin OS=Apis mellifera OX=7460 GN=Chd64 PE=3 SV=1	0	FALSE		77.693	66	11	126	10	188	20.8	8.41	44.39	0	4.17	5.42	33.4	26.29	1.81	13.47	14.14	12.27	7.14	15.78	2.6	33.41	3.36	13.43	11.9	10	1	1	3	7	8	1	7	5	6	4	6	1	5	1	6	3
FALSE	High	Master Protein	A0A088ASZ6	Transgelin OS=Apis mellifera OX=7460 GN=Mp20 PE=3 SV=1	0	FALSE		232.249	84	24	687	16	184	20.5	8.66	244.18	16.8	76.69	27.48	65.21	157.36	28.2	75.62	47.33	46.87	107.43	106.87	170.67	51.48	24.12	143.65	4.3	23	5	12	8	11	19	7	19	11	14	19	15	14	12	7	21	4
FALSE	High	Master Protein	A0A087ZNF1	Transgelin OS=Apis mellifera OX=7460 PE=3 SV=1	0	FALSE		92.298	64	11	310	3	121	13.1	9.54	132.86	2.35	37.56	10.49	16.61	83.08	10.69	14.5	13.75	4.7	28.91	73.85	32.19	56.52	7.84	52.32	4.3	10	1	9	3	4	10	2	5	4	4	6	9	4	7	2	8	2
FALSE	High	Master Protein	A0A088A372	Transglut_N domain-containing protein OS=Apis mellifera OX=7460 PE=4 SV=1	0	FALSE		4.894	7	1	1	1	241	27.4	6.55										0																	1
FALSE	High	Master Protein	A0A088A461	Transient receptor potential cation channel protein painless OS=Apis mellifera OX=7460 GN=Pain PE=2 SV=1	0	FALSE		7.299	2	2	3	2	892	102.6	7.12									2.39						4.67											1						2
FALSE	High	Master Protein	A0A088AUY4	Transket_pyr domain-containing protein OS=Apis mellifera OX=7460 GN=LOC550804 PE=4 SV=1	0	FALSE		146.899	47	22	121	22	622	67.4	7.74	42.21		2.42	0	1.92	14.35		19.53	13.07	0	2.41	3.15	1.93	60.28	4.64	31.07	2.25	14		1	1	2	8		15	6	1	4	3	1	10	1	14	5
FALSE	High	Master Protein	A0A088AHH8	Transket_pyr domain-containing protein OS=Apis mellifera OX=7460 PE=4 SV=1	0	FALSE		205.043	38	31	177	31	1121	126.5	8.09	47.38		9.15	6.42	51.63	17.09	0		42.91		11.99	1.94	31.06	51.77	87.29	9.36		16		4	6	15	7	1		15		8	2	13	14	18	4
FALSE	High	Master Protein	A0A093S6B9	Transketolase OS=Pectobacterium carotovorum subsp. carotovorum OX=555 GN=KP17_18210 PE=3 SV=1	0	FALSE	Bacteria	4.559	3	1	1	1	664	71.8	5.91								2.13																	1
FALSE	High	Master Protein	A0A1S6LRF4	Translation initiation factor IF-3 OS=Serratia marcescens OX=615 GN=infC PE=3 SV=1	0	FALSE	Bacteria	4.914	11	1	1	1	183	21	9.44								0																	1
FALSE	High	Master Protein	A0A088AJ89	Translocon-associated protein subunit beta OS=Apis mellifera OX=7460 GN=SsRbeta PE=3 SV=1	0	FALSE		4.096	6	1	2	1	191	21.9	7.14									1.85						2.24											1						1
FALSE	High	Master Protein	A0A088A1M4	Transmembrane 9 superfamily member OS=Apis mellifera OX=7460 GN=LOC552723 PE=3 SV=1	0.009	FALSE		2.658	2	1	1	1	632	72.4	8.82					0																	1
FALSE	High	Master Protein	A0A088AT93	Transporter OS=Apis mellifera OX=7460 GN=Gat-a PE=3 SV=1	0	FALSE		4.615	3	2	2	2	611	69.3	7.11				1.99																	2
FALSE	High	Master Protein	A0A087ZPI0	TRASH domain-containing protein OS=Apis mellifera OX=7460 GN=RpL24 PE=4 SV=1	0	FALSE		18.548	26	4	28	4	154	17.5	10.98	2.99		7.44	1.65	10.65	5.59	0		13.78			3.2	1.86	6.58	8.37	2.86		1		3	1	3	2	1		4			1	1	1	2	1
FALSE	High	Master Protein	A0A088AUT8	Trehalase OS=Apis mellifera OX=7460 GN=LOC410795 PE=3 SV=1	0	FALSE		37.635	19	8	16	8	662	77.2	6.19					9.24				7.94					2.19	3.73							5				5					1	2
FALSE	High	Master Protein	A0A093SIV2	Trigger factor OS=Pectobacterium carotovorum subsp. carotovorum OX=555 GN=tig PE=3 SV=1	0	FALSE	Bacteria	4.028	5	2	2	1	434	48.1	4.86								0																	2
FALSE	High	Master Protein	A0A221H4U2	Trigger factor OS=Serratia marcescens OX=615 GN=tig PE=3 SV=1	0	FALSE	Bacteria	5.015	5	2	2	1	434	48.3	4.84								1.99																	2
FALSE	High	Master Protein	A4ZXC4	Triosephosphate isomerase OS=Apis mellifera OX=7460 GN=Tpi PE=2 SV=1	0	FALSE		96.603	82	17	125	17	247	26.9	8.05	32.08			14.97	7.93	38.36	4.1	12.52	13.45	0	9.44	32.06	8.79	25.29	2.64	21.53	1.92	10			5	3	11	2	6	4	1	8	10	5	9	1	8	4
FALSE	High	Master Protein	A0A084WZB4	Triosephosphate isomerase OS=Serratia marcescens OX=615 GN=tpiA PE=3 SV=1	0.01	FALSE	Bacteria	2.573	4	1	2	1	255	26.6	6.54								1.98																	1
FALSE	High	Master Protein	I7LRF0	Troponin C type I OS=Apis mellifera OX=7460 GN=TpnCI PE=4 SV=1	0	FALSE		148.669	63	18	229	18	145	16.8	4.27	12.81		33.88		35.53	36.44	18.43	3.91	69.52	0	4.52	47.1	20.31	147.99	44.11	61.79		3		8		9	7	6	2	13	1	1	11	6	12	7	16
FALSE	High	Master Protein	A0A088A1R8	Troponin C type IIa OS=Apis mellifera OX=7460 PE=4 SV=1	0	FALSE		37.459	58	7	23	7	150	16.7	4.17	15.85						8.89	2.14								8.41		5						4	3								5
FALSE	High	Master Protein	I7LST5	Troponin C type IIb OS=Apis mellifera OX=7460 GN=TpnCIIb PE=4 SV=1	0	FALSE		5.869	10	1	2	1	148	17	4.42														2.34		0															1		1
FALSE	High	Master Protein	I7KJQ1	Troponin C type IIIa OS=Apis mellifera OX=7460 GN=TpnCIIIa PE=4 SV=1	0	FALSE		72.437	70	9	46	9	153	17.3	4.17			11.08		12.73	7.34	5.5		4.22	2.63	11.54	5.85		47.78	3.81	3.61				3		4	2	1		2	2	3	3		4	1	3
FALSE	High	Master Protein	I7L9D8	Troponin C type IIIb OS=Apis mellifera OX=7460 GN=TpnCIIIb PE=4 SV=1	0	FALSE		15.017	22	2	3	2	153	17.2	4.04	3.92																	2
FALSE	High	Master Protein	Q3B709	Troponin H isoform 1 OS=Apis mellifera OX=7460 GN=TpnH PE=4 SV=1	0	FALSE		102.281	21	16	284	0	430	45.2	5.16	44.55		44.26		80.17	52.2	22.53	2.49	70.39	2.03	7.25	34.78	42.23	49.9	46.42	15.62		10		8		13	13	9	1	12	2	2	10	9	6	7	6
FALSE	High	Master Protein	Q3B708	Troponin I isoform 6a1 OS=Apis mellifera OX=7460 GN=TpnI PE=4 SV=1	0	FALSE		150.762	42	19	558	7	212	25.4	9.72	82.94		115.93	0	162.96	135.49	55.01	4.62	204.27	2.03	12.18	85.34	126.28	152.56	145.99	45.76		11		13	1	13	16	10	2	14	3	3	12	12	10	10	9
FALSE	High	Master Protein	Q3B707	Troponin I isoform 6a2 OS=Apis mellifera OX=7460 GN=TpnI PE=4 SV=1	0	FALSE		66.504	36	14	212	3	212	25.2	9.67	26.56		32.5		55.87	40.35	16.73		45.96	0	1.62	18.58	27.67	31.15	27.53	8.28		6		7		8	10	8		9	1	1	7	7	5	5	4
FALSE	High	Master Protein	Q3B705	Troponin I isoform 6b1 OS=Apis mellifera OX=7460 GN=TpnI PE=4 SV=1	0	FALSE		80.279	41	14	245	0	204	24.6	9.69	42.28		33.02		67.48	40.03	26.31	2.49	51.41	2.03	5.63	30.36	31.96	40.76	35.31	15.62		10		6		12	11	9	1	10	2	1	8	8	5	5	5
FALSE	High	Master Protein	Q3B706	Troponin I isoform 6b2 OS=Apis mellifera OX=7460 GN=TpnI PE=4 SV=1	0	FALSE		87.942	43	13	228	4	204	24.4	9.8	44.76		25.8		86.32	46.54	14.61		61.76	0		37.04	17.4	50.43	41.52	12.13		8		7		11	11	7		10	1		8	6	7	6	5
FALSE	High	Master Protein	Q3B711	Troponin T isoform 1 OS=Apis mellifera OX=7460 GN=TpnT PE=4 SV=1	0	FALSE		321.462	49	35	1073	4	409	49.1	4.74	180.93		182.56	0	296.73	173.08	102.57	13.13	304.1	25.62	35.75	207.5	276.47	380.91	274.27	91.49	0	20		19	1	26	21	20	9	25	8	11	25	22	24	21	16	2
FALSE	High	Master Protein	A0A088A152	Tr-type G domain-containing protein OS=Apis mellifera OX=7460 GN=Elf PE=4 SV=1	0	FALSE		6.091	8	2	2	2	598	65.9	5.59														0		2.02															1		1
FALSE	High	Master Protein	A0A088A5X7	Tr-type G domain-containing protein OS=Apis mellifera OX=7460 GN=LOC409167 PE=4 SV=1	0	FALSE		170.018	50	32	151	32	844	94.5	6.52	59.36		6.79	5.98	4.79	26.37		4.22	14.74	2.34	17.69	9.06	10.15	29.49	12.95	27.34	0	18		3	4	5	13		7	6	4	16	9	7	10	5	16	2
FALSE	High	Master Protein	A0A088AA44	Tr-type G domain-containing protein OS=Apis mellifera OX=7460 GN=LOC410414 PE=4 SV=1	0	FALSE		8.198	3	2	5	2	980	110.3	5.4									0					0	2.57											2					2	1
FALSE	High	Master Protein	A0A088A9P5	t-SNARE coiled-coil homology domain-containing protein OS=Apis mellifera OX=7460 GN=Syx7 PE=3 SV=1	0	FALSE		35.672	33	6	10	6	271	30.7	8.12				2.13	2.65				4.02				3.87		8.98						2	1				2				2		3
FALSE	High	Master Protein	A0A087ZW55	t-SNARE coiled-coil homology domain-containing protein OS=Apis mellifera OX=7460 PE=3 SV=1	0	FALSE		20.489	21	5	12	5	331	38	5.4			0	0	0								0		2.3					2	3	1								1		4
FALSE	High	Master Protein	A0A088AKL6	Tubulin alpha chain OS=Apis mellifera OX=7460 GN=LOC408388 PE=3 SV=1	0	FALSE		306.152	60	25	1040	1	450	49.9	5.14	296.7	11.25	134.9	252.25	165.16	125.16	55.81	97.74	154.68	116.41	148.85	106.28	310.07	171.54	214.03	193.21	54.86	20	7	15	21	19	18	14	16	18	19	19	16	20	16	17	18	14
FALSE	High	Master Protein	A0A088ANF0	Tubulin alpha chain OS=Apis mellifera OX=7460 GN=LOC411519 PE=3 SV=1	0	FALSE		112.135	24	8	363	1	448	50.4	5.43	117.05	5.97	54.41	100.65	68.97	41.67	20.92	40.61	64.61	52.64	74.29	45.37	63.5	38.93	50.76	44.09	19.3	7	4	7	7	6	6	5	6	6	7	7	5	6	5	6	6	4
FALSE	High	Master Protein	A0A088A436	Tubulin alpha chain OS=Apis mellifera OX=7460 GN=LOC550827 PE=3 SV=1	0	FALSE		302.951	60	25	1025	1	450	49.9	5.14	283.48	11.25	139.52	248.78	164.3	120.17	55.81	97.33	149.12	116.41	145.11	101.15	305.81	168.23	208.87	188.88	54.86	20	7	16	21	19	17	13	16	18	19	19	15	19	16	17	18	13
FALSE	High	Master Protein	A0A088ATP8	Tubulin alpha chain OS=Apis mellifera OX=7460 PE=3 SV=1	0	FALSE		101.098	21	9	295	2	480	53.6	5.38	85.39	2.17	40.14	68.55	62.65	47.64	10.44	33.24	61.72	41.59	54.02	49.25	62.04	20.42	22.27	22.57	8	5	2	5	7	6	6	4	4	6	6	6	6	5	4	2	4	2
FALSE	High	Master Protein	Q86ZW8	Tubulin beta chain (Fragment) OS=Antonospora locustae OX=278021 GN=btub PE=3 SV=1	0	FALSE	Nosema	44.426	14	7	269	1	387	43	6.24	32.11	4.17	37.14	75.89	49.65	38.24	16.97	17.37	30.64	20.45	31.58	29.16	57.72	41.24	55.47	24.37	12.72	5	2	4	6	5	5	5	3	4	4	4	6	5	3	4	4	2
FALSE	High	Master Protein	A0A087ZYZ1	Tubulin beta chain OS=Apis mellifera OX=7460 GN=LOC408782 PE=3 SV=1	0	FALSE		367.092	83	29	1526	8	447	50.1	4.86	360.36	31.91	210.22	372.41	238.24	224.68	91.26	122.79	208.2	129.32	197.65	153.71	509.46	211.65	414.74	322.99	60.16	26	10	20	26	24	22	20	20	21	20	19	21	22	21	24	24	13
FALSE	High	Master Protein	A0A087ZSC1	Tubulin beta chain OS=Apis mellifera OX=7460 GN=LOC410559 PE=3 SV=1	0	FALSE		161.394	36	17	652	1	447	49.9	4.89	146.34	17.53	107.94	176.71	113.14	107.76	47.86	58.68	93.43	56.41	78.15	72	243.88	90.2	135.81	88.49	28.36	13	5	12	14	13	12	10	9	10	9	8	13	12	10	13	11	5
FALSE	High	Master Protein	A0A087ZYZ2	Tubulin beta chain OS=Apis mellifera OX=7460 GN=LOC410994 PE=3 SV=1	0	FALSE		170.603	39	16	689	1	455	51	4.86	130.16	21.57	91.16	144.2	104.08	89.3	55.65	61.19	83.19	63.12	98.96	78.68	278.63	118.24	201.8	125.8	25.55	10	6	10	13	11	11	10	9	9	9	9	12	11	11	13	12	5
FALSE	High	Master Protein	C4V944	Tubulin beta chain OS=Nosema ceranae (strain BRL01) OX=578460 GN=NCER_101053 PE=3 SV=1	0	FALSE	Nosema	22.085	10	4	103	1	439	49.1	5.06	11.88		15.87	17.44	19.32	12.86	6.31	8.08	11.75	10.59	14.77	8.91	31.49	18.02	18.18	16.8	8	1		1	2	1	1	1	1	1	1	2	2	3	2	2	2	1
FALSE	High	Master Protein	A0A088AKW3	Tubulin-specific chaperone A OS=Apis mellifera OX=7460 GN=LOC725630 PE=3 SV=1	0	FALSE		6.537	41	3	4	3	118	13.9	5.19								0						0		0									2						1		1
FALSE	High	Master Protein	B8XIJ0	Tweedle motif cuticular protein 1 (Fragment) OS=Apis mellifera OX=7460 GN=Twld1 PE=2 SV=1	0	FALSE		110.184	26	5	341	4	331	30.5	9.23	7.88		301.28	20.69	112.96	79.02	13.98		0	1.72		30.25	183.91	3.26	298.45	14.45	0	2		5	3	4	4	3		1	1		4	4	1	4	4	1
FALSE	High	Master Protein	E2IFU8	Tweedle motif cuticular protein 2 (Fragment) OS=Apis mellifera OX=7460 GN=Twdl2 PE=2 SV=2	0	FALSE		14.633	19	3	141	2	185	20.1	8.48	11		39.97	3.75	17.52	5.38	3.51		0	1.72		5.18	18.85		75.51	1.61	0	3		1	1	2	1	1		1	1		1	2		1	1	1
FALSE	High	Master Protein	A0A088AVW5	TYR_PHOSPHATASE_2 domain-containing protein OS=Apis mellifera OX=7460 PE=4 SV=1	0	FALSE		16.531	26	3	9	3	172	19.8	8.31	2.7		3.6						3.08	0	0	0	1.82					2		1						1	2	1	1	1
FALSE	High	Master Protein	A0A087ZQN7	Tyrosine-protein kinase OS=Apis mellifera OX=7460 GN=LOC412588 PE=3 SV=1	0	FALSE		15.477	10	4	7	3	505	57.7	6.43			1.95						0				1.86		4.73	0				1						1				1		2	1
FALSE	High	Master Protein	A0A088AMC1	Tyrosine--tRNA ligase OS=Apis mellifera OX=7460 GN=Aats-tyr PE=3 SV=1	0	FALSE		56.418	41	15	42	15	522	58.7	6	9.99		10.06	2.04		7.59			6.27		9.22	4.77		1.85	11.74	4.1		6		4	1		3			4		6	2		1	5	4
FALSE	High	Master Protein	A0A088A1S9	UAS domain-containing protein OS=Apis mellifera OX=7460 PE=4 SV=1	0	FALSE		21.122	11	3	5	3	409	47.8	6.07			6.08						0					3.58	5.37					2						1					1	1
FALSE	High	Master Protein	A0A088AVS9	UBA_e1_C domain-containing protein OS=Apis mellifera OX=7460 GN=Uba1 PE=3 SV=1	0	FALSE		87.253	18	17	55	17	1049	117	5.6	15.95			3.42		4.82			7.12	0	0	0	9.55	14.41	31.08	3.38		8			3		4			4	1	1	1	6	5	10	5
FALSE	High	Master Protein	A0A088A5Z8	Ubiquitin carboxyl-terminal hydrolase OS=Apis mellifera OX=7460 GN=faf PE=3 SV=1	0	FALSE		4.741	0	1	1	1	2588	294.6	6.14															0																	1
FALSE	High	Master Protein	A0A088A052	Ubiquitin carboxyl-terminal hydrolase OS=Apis mellifera OX=7460 GN=LOC552324 PE=3 SV=1	0	FALSE		17.02	7	4	7	4	802	91.4	5.67	0								2.36					1.9		0		2								1					3		1
FALSE	High	Master Protein	A0A088ADV0	Ubiquitin carboxyl-terminal hydrolase OS=Apis mellifera OX=7460 GN=Uch PE=3 SV=1	0	FALSE		15.121	21	3	19	3	234	26.2	5.01	6.8			4.91		0		4.8			2.22	5.1			0	4.69	0	1			1		1		2			2	3			1	1	1
FALSE	High	Master Protein	A0A087ZSM2	Ubiquitin carboxyl-terminal hydrolase OS=Apis mellifera OX=7460 PE=3 SV=1	0	FALSE		21.531	8	4	4	4	884	95.8	8.46									2.01						3.36											2						2
FALSE	High	Master Protein	A0A088ABX5	UBIQUITIN_CONJUGAT_2 domain-containing protein OS=Apis mellifera OX=7460 GN=LOC409225 PE=3 SV=1	0	FALSE		13.27	20	3	7	3	181	20.5	8.03	4.31										0	0	1.75	3.26		0		2										1	1	1	1		1
FALSE	High	Master Protein	A0A088A509	UBIQUITIN_CONJUGAT_2 domain-containing protein OS=Apis mellifera OX=7460 GN=LOC409920 PE=4 SV=1	0	FALSE		14.832	28	4	19	4	144	16.3	7.14	4.62			0		2.49		0		0	0	1.98	3.73	4.8		1.62		1			1		1		2		1	2	1	2	3		3
FALSE	High	Master Protein	A0A088A1Z8	UBIQUITIN_CONJUGAT_2 domain-containing protein OS=Apis mellifera OX=7460 GN=LOC413822 PE=3 SV=1	0	FALSE		30.269	47	6	25	6	158	18.2	8.56	14.77		2.36		2.73	6.4		2.31		0	2.69	14.48		2.26				4		1		1	2		3		2	1	4		1
FALSE	High	Master Protein	A0A088AG51	UBIQUITIN_CONJUGAT_2 domain-containing protein OS=Apis mellifera OX=7460 GN=LOC724793 PE=3 SV=1	0	FALSE		16.19	24	2	20	2	147	16.7	7.3	4.26			1.86	0	7.25		2.2	3.28	0	2.11	9.43	2.05			1.72		1			1	1	2		2	1	2	2	2	1			1
FALSE	High	Master Protein	A0A088A3B1	UBIQUITIN_CONJUGAT_2 domain-containing protein OS=Apis mellifera OX=7460 GN=Ubc13 PE=3 SV=1	0	FALSE		32.768	41	4	58	4	151	17.2	6.01	23.54		4.97	12.29	6.52	14.19	0	4.17	5.64	8.69	6.46	10.31	0	6.78	5.33	3.73		4		1	3	2	3	3	3	2	4	3	4	1	2	1	2
FALSE	High	Master Protein	A0A088ADQ8	UBIQUITIN_CONJUGAT_2 domain-containing protein OS=Apis mellifera OX=7460 GN=UbcD6 PE=3 SV=1	0.008	FALSE		2.866	11	1	1	1	151	17.2	5.99														0																	1
FALSE	High	Master Protein	A0A088A4Q8	Ubiquitin-fold modifier 1 OS=Apis mellifera OX=7460 GN=726196 PE=3 SV=1	0	FALSE		14.318	67	4	7	4	87	9.4	9.52	0					2.54						2.03		0				2					3						1		1
FALSE	High	Master Protein	A0A088A321	Ubiquitin-like domain-containing protein OS=Apis mellifera OX=7460 GN=e(y)2 PE=4 SV=1	0	FALSE		17.256	36	2	18	2	77	8.7	7.25	8.26			0		2.96		2.53		7.64	5.43	5.9				5.08		2			1		1		1		2	1	1				1
FALSE	High	Master Protein	A0A088ANI1	Ubiquitin-like domain-containing protein OS=Apis mellifera OX=7460 GN=Elongin-B PE=4 SV=1	0.01	FALSE		2.571	21	1	1	1	117	13.1	5.01								0																	1
FALSE	High	Master Protein	A0A087ZY80	Ubiquitin-like domain-containing protein OS=Apis mellifera OX=7460 GN=LOC551718 PE=4 SV=1	0	FALSE		7.167	17	2	4	2	150	16.8	6.55	3.76					0						2						2					1						1
FALSE	High	Master Protein	A0A088AVY1	Ubiquitin-like domain-containing protein OS=Apis mellifera OX=7460 GN=RpS27A PE=4 SV=1	0	FALSE		41.762	46	6	117	3	156	17.9	9.8	13.53	1.71	14.03	5.93	6.97	20.02	1.64	7.71	11.12	5.45	3.47	11.58	27.26	39.53	27.87	19.82	5.79	4	1	3	2	3	4	1	2	5	3	2	4	5	5	3	4	2
FALSE	High	Master Protein	A0A087ZRU4	Ubiquitin-like domain-containing protein OS=Apis mellifera OX=7460 PE=4 SV=1	0	FALSE		31.648	7	5	15	5	1310	144	5.39	2				0	9.11			7.46			7.29	2.52	0	5.72			1				1	3			1			3	1	1	2
FALSE	High	Master Protein	A0A088A3N0	U-box domain-containing protein OS=Apis mellifera OX=7460 PE=4 SV=1	0.006	FALSE		3.378	1	1	1	1	1022	116.6	5.68														0																	1
FALSE	High	Master Protein	A0A088AK76	UBR-type domain-containing protein OS=Apis mellifera OX=7460 GN=LOC412281 PE=4 SV=1	0	FALSE		4.945	0	1	1	1	5421	604.7	6.32															2.13																	1
FALSE	High	Master Protein	A0A088ANQ3	UBX domain-containing protein OS=Apis mellifera OX=7460 GN=Gint3 PE=4 SV=1	0	FALSE		7.851	4	1	3	1	441	51	8.06	1.98		0			0												1		1			1
FALSE	High	Master Protein	A0A087ZN16	UBX domain-containing protein OS=Apis mellifera OX=7460 GN=LOC408433 PE=4 SV=1	0	FALSE		54.888	23	9	20	9	521	58.5	5.52			3.11	2.37	2.88	2.14			9.57			2.61	0	4.58	21.84					1	1	1	1			4			2	1	2	6
FALSE	High	Master Protein	A0A088A7I2	UDP-glucuronosyltransferase OS=Apis mellifera OX=7460 GN=LOC409203 PE=3 SV=1	0	FALSE		201.98	49	23	289	23	526	60.2	8.81	4.26		266.94	0	50.1	80.75			70.61	0		37.78	122.84	11.59	85.43	5.08		2		22	3	8	15			11	2		10	15	4	14	5
FALSE	High	Master Protein	A0A088A7I0	UDP-glucuronosyltransferase OS=Apis mellifera OX=7460 GN=LOC727593 PE=3 SV=1	0	FALSE		61.985	25	9	30	9	523	59.7	7.99			46.9			0			15.92				0		15.77	0				7			1			4				1		3	1
FALSE	High	Master Protein	A0A087ZQF4	UDP-glucuronosyltransferase OS=Apis mellifera OX=7460 PE=3 SV=1	0	FALSE		5.81	4	2	4	2	505	58	8.57					1.77	1.63			1.77						2.83							1	1			1						1
FALSE	High	Master Protein	A0A1Y0M461	UDP-N-acetylglucosamine 2-epimerase OS=Enterococcus faecalis OX=1351 GN=A6B47_14405 PE=3 SV=1	0.007	FALSE	Bacteria	3.165	5	1	1	1	374	42.6	5.69								0																	1
FALSE	High	Master Protein	A0A0A5M402	Uncharacterized lipoprotein OS=Serratia marcescens OX=615 GN=A8A12_17700 PE=4 SV=1	0.008	FALSE	Bacteria	2.796	5	1	1	1	192	20.7	8.4								0																	1
FALSE	High	Master Protein	D3XL80	Uncharacterized protein (Fragment) OS=Apis mellifera OX=7460 PE=2 SV=1	0	FALSE		37.702	38	3	31	3	88	9.6	9.19	53.96		7.31					0							11.85		0	3		1					1							1		1
FALSE	High	Master Protein	A0A088ATW9	Uncharacterized protein OS=Apis mellifera OX=7460 GN=100302106 PE=4 SV=1	0	FALSE		17.674	43	2	13	2	61	6.9	9.13					8.36	0			2.81			3.22	0		7.58							2	1			2			1	1		1
FALSE	High	Master Protein	A0A088AG24	Uncharacterized protein OS=Apis mellifera OX=7460 GN=100576125 PE=4 SV=1	0	FALSE		6.707	3	1	3	1	425	49.2	8.29			3.03		0				2.91											1		1				1
FALSE	High	Master Protein	A0A088A3R4	Uncharacterized protein OS=Apis mellifera OX=7460 GN=100576174 PE=4 SV=1	0.008	FALSE		2.924	6	1	1	1	155	18.1	6.16			1.94																	1
FALSE	High	Master Protein	A0A088AAC3	Uncharacterized protein OS=Apis mellifera OX=7460 GN=100576193 PE=4 SV=1	0.006	FALSE		3.275	4	1	4	1	251	27.2	9.33										2.18																	1
FALSE	High	Master Protein	A0A088AGJ9	Uncharacterized protein OS=Apis mellifera OX=7460 GN=100576418 PE=4 SV=1	0	FALSE		107.15	61	12	46	11	360	39.3	9.1	121.36						2.29								3.71		0	12						1								1		1
FALSE	High	Master Protein	A0A088ACD4	Uncharacterized protein OS=Apis mellifera OX=7460 GN=100576467 PE=4 SV=1	0	FALSE		17.015	39	4	13	4	152	17.2	7.05	2.86					2.37		3.87			0	7.3		2.66				1					1		4			1	2		2
FALSE	High	Master Protein	A0A088ACU3	Uncharacterized protein OS=Apis mellifera OX=7460 GN=100576662 PE=4 SV=1	0	FALSE		4.044	14	1	1	1	155	17.4	7.69							0																	1
FALSE	High	Master Protein	A0A087ZZ49	Uncharacterized protein OS=Apis mellifera OX=7460 GN=100576745 PE=4 SV=1	0	FALSE		10.598	12	3	3	3	303	34.6	8.27														4.89	0																2	1
FALSE	High	Master Protein	A0A088A704	Uncharacterized protein OS=Apis mellifera OX=7460 GN=100576748 PE=4 SV=1	0	FALSE		13.045	22	2	6	2	127	14.3	9.09	8.61			0	2.09					0								2			1	1					1
FALSE	High	Master Protein	A0A087ZV27	Uncharacterized protein OS=Apis mellifera OX=7460 GN=100576902 PE=4 SV=1	0	FALSE		8.411	3	1	2	1	566	63.3	9.2								0																	1
FALSE	High	Master Protein	A0A088ABP4	Uncharacterized protein OS=Apis mellifera OX=7460 GN=100576916 PE=4 SV=1	0	FALSE		44.45	70	6	17	6	166	17.3	6.52							38.11																	6
FALSE	High	Master Protein	A0A087ZTF9	Uncharacterized protein OS=Apis mellifera OX=7460 GN=100576930 PE=4 SV=1	0.008	FALSE		2.709	12	1	1	1	190	22.2	9.55															2.26																	1
FALSE	High	Master Protein	A0A088AHM1	Uncharacterized protein OS=Apis mellifera OX=7460 GN=100576945 PE=4 SV=1	0	FALSE		9.742	22	2	3	2	133	15.5	8.88					2.35										0							1										1
FALSE	High	Master Protein	A0A088AEP4	Uncharacterized protein OS=Apis mellifera OX=7460 GN=100576958 PE=4 SV=1	0.009	FALSE		2.592	0	1	4	1	1938	219.6	6.37									3.46																	1
FALSE	High	Master Protein	A0A088AJX2	Uncharacterized protein OS=Apis mellifera OX=7460 GN=100577002 PE=3 SV=1	0	FALSE		83.389	35	16	123	16	466	55.2	5.68	6.62		12.63	28.57	38.59	23.7			40.08	6.25		5.67	17.14	2.68	18.7	2.14		6		6	14	12	9			10	6		4	7	2	7	3
FALSE	High	Master Protein	A0A088A884	Uncharacterized protein OS=Apis mellifera OX=7460 GN=100577163 PE=4 SV=1	0	FALSE		61.091	46	12	44	12	346	38.8	8.22	16.87	1.83		0	17.65		1.93	21				3.06					1.91	6	2		1	6		2	9				2					4
FALSE	High	Master Protein	A0A088ACR6	Uncharacterized protein OS=Apis mellifera OX=7460 GN=100577341 PE=4 SV=1	0	FALSE		5.226	13	1	1	1	107	13.2	9.99															3.46																	1
FALSE	High	Master Protein	A0A088A5S4	Uncharacterized protein OS=Apis mellifera OX=7460 GN=100577378 PE=4 SV=1	0	FALSE		4.689	4	1	1	1	393	43.2	6.34											0																	1
FALSE	High	Master Protein	A0A088A5P8	Uncharacterized protein OS=Apis mellifera OX=7460 GN=100577504 PE=4 SV=1	0.01	FALSE		2.455	2	1	1	1	788	88.1	5.29																	0																	1
FALSE	High	Master Protein	A0A088AG71	Uncharacterized protein OS=Apis mellifera OX=7460 GN=100577527 PE=4 SV=1	0	FALSE		38.41	33	4	111	4	145	15.8	7.5	27.24		62.4	33.27	2.74	8.4	0	38.33		6.13	10.97	10.03	18.72		13.14	20.68	12.8	4		4	4	2	3	1	4		3	4	3	2		2	4	3
FALSE	High	Master Protein	A0A088AG38	Uncharacterized protein OS=Apis mellifera OX=7460 GN=100577562 PE=4 SV=1	0	FALSE		38.534	18	8	12	8	724	81.9	8.54	23.55																	8
FALSE	High	Master Protein	A0A087ZR63	Uncharacterized protein OS=Apis mellifera OX=7460 GN=100577576 PE=4 SV=1	0	FALSE		34.741	33	6	14	6	257	28.8	5.35	18.71																	6
FALSE	High	Master Protein	A0A088AUM9	Uncharacterized protein OS=Apis mellifera OX=7460 GN=100577661 PE=4 SV=1	0	FALSE		9.333	15	3	5	3	229	27	9.03					1.67				1.81			0	0		2.78							1				1			1	1		1
FALSE	High	Master Protein	A0A087ZSI6	Uncharacterized protein OS=Apis mellifera OX=7460 GN=100577901 PE=4 SV=1	0.006	FALSE		3.533	5	1	2	1	215	23	7.34	0							2.26										1							1
FALSE	High	Master Protein	A0A088ANF1	Uncharacterized protein OS=Apis mellifera OX=7460 GN=100578006 PE=4 SV=1	0	FALSE		31.452	33	7	16	7	332	37.6	7.03	6.74			1.82				6.01			0			2.38		2.66		3			1				3			2			2		4
FALSE	High	Master Protein	A0A088AEY6	Uncharacterized protein OS=Apis mellifera OX=7460 GN=100578218 PE=4 SV=1	0	FALSE		10.351	15	2	2	2	149	18.1	9.45															3.94																	2
FALSE	High	Master Protein	A0A087ZXS1	Uncharacterized protein OS=Apis mellifera OX=7460 GN=100578392 PE=4 SV=1	0	FALSE		28.16	37	7	30	7	216	24.4	7.43	2.62							15.4			8.24					3.6	5.66	1							4			6					2	4
FALSE	High	Master Protein	A0A088AEB6	Uncharacterized protein OS=Apis mellifera OX=7460 GN=100578478 PE=4 SV=1	0	FALSE		6.99	9	1	2	1	190	21.6	7.77	3.07																	1
FALSE	High	Master Protein	A0A088A5K5	Uncharacterized protein OS=Apis mellifera OX=7460 GN=100578514 PE=4 SV=1	0	FALSE		98.887	54	10	58	9	232	23.9	8.95	206.22																	10
FALSE	High	Master Protein	A0A088AIT9	Uncharacterized protein OS=Apis mellifera OX=7460 GN=100578586 PE=4 SV=1	0	FALSE		220.957	53	25	80	25	761	85.5	8.81	228.78																	25
FALSE	High	Master Protein	A0A087ZX19	Uncharacterized protein OS=Apis mellifera OX=7460 GN=100578624 PE=3 SV=1	0.009	FALSE		2.613	3	1	2	1	306	34.4	7.83	0															1.61		1															1
FALSE	High	Master Protein	A0A087ZUS8	Uncharacterized protein OS=Apis mellifera OX=7460 GN=100578625 PE=4 SV=1	0	FALSE		147.114	83	11	119	11	166	17.7	9.55	324.32		0				0								9.08		2.45	11		1				1								2		3
FALSE	High	Master Protein	A0A088AG45	Uncharacterized protein OS=Apis mellifera OX=7460 GN=100578672 PE=4 SV=1	0	FALSE		22.619	21	5	9	5	308	36.1	8.18	4.63		10.41															3		3
FALSE	High	Master Protein	A0A088AHX1	Uncharacterized protein OS=Apis mellifera OX=7460 GN=100578731 PE=4 SV=1	0.009	FALSE		2.59	6	1	1	1	246	28	9.06								0																	1
FALSE	High	Master Protein	A0A088AUA5	Uncharacterized protein OS=Apis mellifera OX=7460 GN=100578782 PE=4 SV=1	0	FALSE		14.718	26	1	39	1	58	6.9	8.5	6.22		6.15	7.84	11.74	9.53	5.59		14.34	4.1		8.57	11.95	4.69	6.85	2.64	0	1		1	1	1	1	1		1	1		1	1	1	1	1	1
FALSE	High	Master Protein	A0A088A5K7	Uncharacterized protein OS=Apis mellifera OX=7460 GN=100579019 PE=4 SV=1	0	FALSE		15.127	17	2	21	2	134	15	10.52			2.49				8.87	41.54								3.37	8.26			1				2	2								1	2
FALSE	High	Master Protein	A0A088AF65	Uncharacterized protein OS=Apis mellifera OX=7460 GN=102653784 PE=4 SV=1	0.009	FALSE		2.617	5	1	1	1	223	24.6	8.84										1.67																	1
FALSE	High	Master Protein	A0A088AVC5	Uncharacterized protein OS=Apis mellifera OX=7460 GN=102653862 PE=4 SV=1	0	FALSE		24.59	24	3	29	3	152	17.8	7.49	5.92		6.22	10.63	10.26	6.24	2.5		13.41	1.67		8.73	2.06	2.37	10.56	0		1		2	3	2	1	1		3	1		2	1	1	2	1
FALSE	High	Master Protein	A0A087ZNY8	Uncharacterized protein OS=Apis mellifera OX=7460 GN=102654371 PE=4 SV=1	0	FALSE		25.474	33	5	19	5	299	31	8.13							30.43							2.77										5							1
FALSE	High	Master Protein	A0A087ZX74	Uncharacterized protein OS=Apis mellifera OX=7460 GN=102654955 PE=4 SV=1	0	FALSE		156.903	63	18	247	18	238	27.8	7.43	38.67		69.9	32.91	83.12	20.92	11.61	0	78.73	4.22	0	32.74	30.52	30.59	94.07	9.41		8		9	7	12	7	5	1	13	4	1	7	5	6	14	6
FALSE	High	Master Protein	A0A087ZT74	Uncharacterized protein OS=Apis mellifera OX=7460 GN=102654987 PE=4 SV=1	0	FALSE		67.906	62	10	105	8	206	23.1	5.68	16.63	0	19.26	6.69	10.07	16.85	1.77		24.03	2.02	2.48	17.77	44.31	20.7	29.31	11.4	0	4	1	5	2	3	4	2		4	3	3	4	7	5	5	7	1
FALSE	High	Master Protein	A0A088A5E0	Uncharacterized protein OS=Apis mellifera OX=7460 GN=102656491 PE=4 SV=1	0	FALSE		16.318	17	2	3	2	95	11	9.94									0						8.53											1						2
FALSE	High	Master Protein	A0A087ZWD6	Uncharacterized protein OS=Apis mellifera OX=7460 GN=102656587 PE=4 SV=1	0	FALSE		42.665	44	8	42	8	201	22.9	7.88	2.16		8.26	9.02	6.5	7.7			6.17	0		0	7.06	7.65	10.08	1.77	0	1		3	4	3	3			2	2		1	4	3	4	2	1
FALSE	High	Master Protein	A0A088AHD0	Uncharacterized protein OS=Apis mellifera OX=7460 GN=102656594 PE=4 SV=1	0	FALSE		31.775	37	5	39	5	173	19.1	7.15	3.36		4.41	11.73	14.21	2.89			2.43	4.01			4.62		2.93			2		2	4	5	2			2	3			3		1
FALSE	High	Master Protein	A0A088A1K6	Uncharacterized protein OS=Apis mellifera OX=7460 GN=107963960 PE=4 SV=1	0.008	FALSE		2.875	3	1	2	1	312	35.1	8.72	0											0						1											1
FALSE	High	Master Protein	A0A088A882	Uncharacterized protein OS=Apis mellifera OX=7460 GN=107963996 PE=4 SV=1	0	FALSE		28.024	25	8	15	8	377	42.8	5.8	1.89							4.25		3.95							0	3							4		3							4
FALSE	High	Master Protein	A0A088AN83	Uncharacterized protein OS=Apis mellifera OX=7460 GN=107964351 PE=4 SV=1	0	FALSE		82.952	48	14	99	14	261	30.6	10.99	8.06		43.09		18.89	9.65			36.09			10.31	2.24	0	47.79	1.72		6		7		8	4			5			5	2	1	11	4
FALSE	High	Master Protein	A0A088A9K7	Uncharacterized protein OS=Apis mellifera OX=7460 GN=107964828 PE=4 SV=1	0	FALSE		15.742	23	4	8	4	203	22	8.38							12.93																	4
FALSE	High	Master Protein	A0A0B4J2M0	Uncharacterized protein OS=Apis mellifera OX=7460 GN=107964992 PE=4 SV=1	0	FALSE		20.429	26	5	14	5	205	23.5	5.31	6.64			2.29		0		0		0	0		1.7			0	0	2			1		1		3		1	1		1			2	1
FALSE	High	Master Protein	A0A088A1N6	Uncharacterized protein OS=Apis mellifera OX=7460 GN=107965147 PE=4 SV=1	0	FALSE		23.45	32	3	7	3	134	15.3	5.27					3.14				6.01			2.23		5.44	3.51							1				2			1		2	1
FALSE	High	Master Protein	A0A088ARM4	Uncharacterized protein OS=Apis mellifera OX=7460 GN=107965674 PE=4 SV=1	0	FALSE		7.596	13	1	2	1	122	14.6	8.65	2.6				1.64													1				1
FALSE	High	Master Protein	A0A087ZN37	Uncharacterized protein OS=Apis mellifera OX=7460 GN=408429 PE=4 SV=1	0	FALSE		136.864	26	29	58	29	1617	177.7	8.16	2.86					29.76	3.38		26.37			0	29.63	0	27.96	0		3					11	4		11			1	13	1	10	1
FALSE	High	Master Protein	A0A087ZRX1	Uncharacterized protein OS=Apis mellifera OX=7460 GN=410078 PE=4 SV=1	0	FALSE		8.115	3	2	2	2	904	100.1	7.28													0		2.8															1		1
FALSE	High	Master Protein	A0A088AFE6	Uncharacterized protein OS=Apis mellifera OX=7460 GN=413959 PE=4 SV=1	0	FALSE		7.694	1	1	1	1	1356	154.4	7.17															3.22																	1
FALSE	High	Master Protein	A0A088AF37	Uncharacterized protein OS=Apis mellifera OX=7460 GN=552666 PE=4 SV=1	0	FALSE		12.351	19	2	2	2	149	17.3	5.39			5.69																	2
FALSE	High	Master Protein	A0A087ZZZ6	Uncharacterized protein OS=Apis mellifera OX=7460 GN=552679 PE=3 SV=1	0	FALSE		4.066	2	1	2	1	501	57.7	8.31			2.16																	1
FALSE	High	Master Protein	A0A088AGM5	Uncharacterized protein OS=Apis mellifera OX=7460 GN=724382 PE=4 SV=1	0	FALSE		9.324	13	2	5	2	232	26	4.93	9.3							0										2							1
FALSE	High	Master Protein	A0A087ZZ78	Uncharacterized protein OS=Apis mellifera OX=7460 GN=724481 PE=4 SV=1	0	FALSE		90.175	27	17	80	17	744	86.2	7.25	5.26				23.53	19.49	1.8		52.01			29.9	7.32	23.01	29.08			2				8	5	4		14			9	4	6	7
FALSE	High	Master Protein	A0A088A955	Uncharacterized protein OS=Apis mellifera OX=7460 GN=724624 PE=4 SV=1	0	FALSE		98.323	51	7	129	7	137	15.4	5.8							358.78																	7
FALSE	High	Master Protein	A0A087ZY44	Uncharacterized protein OS=Apis mellifera OX=7460 GN=724708 PE=4 SV=1	0	FALSE		5.451	12	2	4	2	144	17.4	9.38					0	0			1.81													1	1			2
FALSE	High	Master Protein	A0A087ZV73	Uncharacterized protein OS=Apis mellifera OX=7460 GN=724873 PE=4 SV=1	0	FALSE		61.079	65	11	46	11	207	23.2	6.06	6.12		17.31	13.35	7.79	7.32			10.33	0		0	9.7	2.52	29.89	3.66	0	1		5	6	3	2			3	1		2	5	1	6	2	1
FALSE	High	Master Protein	A0A088AQK1	Uncharacterized protein OS=Apis mellifera OX=7460 GN=724993 PE=4 SV=1	0.006	FALSE		3.27	3	1	2	1	315	35.3	5.62																0	0																1	1
FALSE	High	Master Protein	A0A087ZZ18	Uncharacterized protein OS=Apis mellifera OX=7460 GN=725102 PE=4 SV=1	0	FALSE		7.626	14	1	10	1	112	12.1	5.45	4.94		0		0					0	0	3.44						1		1		1					1	1	1
FALSE	High	Master Protein	A0A087ZTD7	Uncharacterized protein OS=Apis mellifera OX=7460 GN=725147 PE=4 SV=1	0	FALSE		4.089	16	1	7	1	56	6.6	9.82	1.98		1.7	0		1.8						1.32						1		1	1		1						1
FALSE	High	Master Protein	A0A088A042	Uncharacterized protein OS=Apis mellifera OX=7460 GN=725148 PE=4 SV=1	0	FALSE		147.982	67	15	159	15	301	33.9	7.97	51.45		2.3		59.15	43.64	13.05		58.43		1.64	31.28	29.69	52.32	58.74	10.43		10		1		9	9	8		9		3	8	4	9	9	6
FALSE	High	Master Protein	A0A087ZRK0	Uncharacterized protein OS=Apis mellifera OX=7460 GN=725217 PE=4 SV=1	0	FALSE		21.352	11	6	13	6	752	85.8	5.19	4.28							10.6									0	2							6									2
FALSE	High	Master Protein	A0A088ADR6	Uncharacterized protein OS=Apis mellifera OX=7460 GN=725645 PE=4 SV=1	0	FALSE		7.276	10	1	4	1	193	21.7	6.81			6.24		2.06															1		1
FALSE	High	Master Protein	A0A087ZY69	Uncharacterized protein OS=Apis mellifera OX=7460 GN=725679 PE=4 SV=1	0	FALSE		20.829	21	4	9	4	283	32	5.57	6.13				2.12				2.55		0	2.67		2.64	2.8			3				1				1		1	1		1	1
FALSE	High	Master Protein	A0A088AGW9	Uncharacterized protein OS=Apis mellifera OX=7460 GN=725789 PE=4 SV=1	0.008	FALSE		2.799	10	1	1	1	166	18.1	5.02			2.79																	1
FALSE	High	Master Protein	A0A087ZVZ6	Uncharacterized protein OS=Apis mellifera OX=7460 GN=725851 PE=3 SV=1	0	FALSE		742.93	95	35	5395	3	332	37.3	5.55	636.95	23.73	1168.97	160.55	1439.16	816.5	386.44	104.65	1447.59	159.96	134.67	703.54	2172.19	2191.11	3574.92	971.9	112.21	19	8	18	14	22	17	17	13	19	13	14	17	24	24	27	23	17
FALSE	High	Master Protein	A0A088AD81	Uncharacterized protein OS=Apis mellifera OX=7460 GN=725855 PE=4 SV=1	0	FALSE		8.272	15	1	1	1	124	13.4	6.77	2.45																	1
FALSE	High	Master Protein	A0A087ZVG6	Uncharacterized protein OS=Apis mellifera OX=7460 GN=726030 PE=4 SV=1	0	FALSE		15.996	10	5	7	5	675	77.6	9.19			3.63	0					6.09						0	1.6				2	1					2						1	1
FALSE	High	Master Protein	A0A088ALR1	Uncharacterized protein OS=Apis mellifera OX=7460 GN=726199 PE=4 SV=1	0	FALSE		42.062	27	10	44	10	368	41.6	4.97	12.47		1.93		7.86	11.34			1.63	1.65	1.73	10.93	12.07	5.79	10.76	6.29	0	3		1		2	3			1	2	1	7	5	2	3	4	2
FALSE	High	Master Protein	A0A088AEW9	Uncharacterized protein OS=Apis mellifera OX=7460 GN=726323 PE=4 SV=1	0	FALSE		25.323	37	4	5	4	164	18.5	7.61	10.16																	4
FALSE	High	Master Protein	A0A088ALH7	Uncharacterized protein OS=Apis mellifera OX=7460 GN=726803 PE=4 SV=1	0	FALSE		11.603	20	3	4	3	138	15.6	9.35								1.96		0															2		2
FALSE	High	Master Protein	A0A088ABQ2	Uncharacterized protein OS=Apis mellifera OX=7460 GN=727106 PE=4 SV=1	0	FALSE		5.708	8	2	3	2	403	44.4	8.09	4.12					0												2					1
FALSE	High	Master Protein	A0A088AMY2	Uncharacterized protein OS=Apis mellifera OX=7460 GN=727241 PE=4 SV=1	0	FALSE		9.854	12	3	4	3	277	31.5	10.76							6.03																	3
FALSE	High	Master Protein	A0A088AW53	Uncharacterized protein OS=Apis mellifera OX=7460 GN=727261 PE=4 SV=1	0.01	FALSE		2.451	2	1	1	1	460	52.4	5.63															2.02																	1
FALSE	High	Master Protein	A0A087ZQI2	Uncharacterized protein OS=Apis mellifera OX=7460 GN=727263 PE=4 SV=1	0	FALSE		32.459	27	7	22	7	333	39	9.07			2.25		4.98	2.23			7.28			0	7.01	2.07	8.22	0				1		1	2			4			1	5	2	2	1
FALSE	High	Master Protein	A0A088ADS7	Uncharacterized protein OS=Apis mellifera OX=7460 GN=727483 PE=4 SV=1	0	FALSE		7.075	26	1	26	1	58	6.8	10.17	2.59		7.73	7.09	5.79	5.94	3.86		5.53	1.73		6.85	8.54	3.58	6.94	1.9		1		1	1	1	1	1		1	1		1	1	1	1	1
FALSE	High	Master Protein	A0A087ZWV6	Uncharacterized protein OS=Apis mellifera OX=7460 GN=727578 PE=4 SV=1	0	FALSE		64.593	43	9	32	9	327	37.9	9.23	10.61		4.66		3.55		37.21			9.31								3		1		1		9			4
FALSE	High	Master Protein	A0A087ZR95	Uncharacterized protein OS=Apis mellifera OX=7460 GN=Aats-gln PE=3 SV=1	0.001	FALSE		3.817	2	1	1	1	776	89.1	7.02									2.63																	1
FALSE	High	Master Protein	A0A088AKB2	Uncharacterized protein OS=Apis mellifera OX=7460 GN=Aats-gly PE=4 SV=1	0	FALSE		33.225	19	9	21	9	740	84.3	7.56	4.05		4.24		2.71	6.29			4.62		2.07	1.86	0	2.1	3.08			1		2		1	2			5		3	2	1	1	1
FALSE	High	Master Protein	A0A088ANI3	Uncharacterized protein OS=Apis mellifera OX=7460 GN=Aats-ile PE=3 SV=1	0	FALSE		11.592	3	2	2	2	1246	144.3	7.05									2.45						2.98											1						1
FALSE	High	Master Protein	A0A088A661	Uncharacterized protein OS=Apis mellifera OX=7460 GN=Aats-trp PE=3 SV=1	0	FALSE		27.35	20	5	10	5	410	46.7	7.34	0										0	9.22		0	4.39			1										3	4		1	1
FALSE	High	Master Protein	A0A088A222	Uncharacterized protein OS=Apis mellifera OX=7460 GN=Aats-val PE=3 SV=1	0	FALSE		6.199	2	2	2	2	1149	133.6	8.16									0						0											1						1
FALSE	High	Master Protein	A0A087ZUB8	Uncharacterized protein OS=Apis mellifera OX=7460 GN=Adk1 PE=3 SV=1	0	FALSE		31.696	54	8	34	8	192	21.9	6.37	9.97			0		0	2.27	3.89		0	9.28	7.68		2.07	2.92	1.78		2			2		2	2	4		1	4	4		3	1	2
FALSE	High	Master Protein	A0A087ZPU6	Uncharacterized protein OS=Apis mellifera OX=7460 GN=AIF PE=4 SV=1	0	FALSE		56.496	22	10	38	10	661	74.3	8.51			23.51	0	5.69	3.02			12.03			2.76	5.53	5.6	17.42					6	1	3	2			6			1	3	2	5
FALSE	High	Master Protein	A0A088AF89	Uncharacterized protein OS=Apis mellifera OX=7460 GN=alpha-Cat PE=4 SV=1	0.005	FALSE		3.68	1	1	1	1	918	102.4	6.81															0																	1
FALSE	High	Master Protein	A0A088AND4	Uncharacterized protein OS=Apis mellifera OX=7460 GN=Apd-2 PE=4 SV=1	0	FALSE		132.219	69	7	531	7	77	7.7	10.43	746.1	40.01		46.02	39.19	31.77	29.12	86.08	10.6	38.21	12.53	13.64	7.95		7.53	47.77	68.99	7	3		3	3	3	3	3	3	3	3	3	3		1	3	3
FALSE	High	Master Protein	A0A088AV14	Uncharacterized protein OS=Apis mellifera OX=7460 GN=Arc42 PE=3 SV=1	0	FALSE		34.352	30	9	28	9	408	44.6	8.53	4.23		2.67		5.23	2.69			4.91		0	4.31	4.48	4.21	20.74	3.95		1		1		3	1			3		1	2	2	2	7	3
FALSE	High	Master Protein	A0A087ZZF3	Uncharacterized protein OS=Apis mellifera OX=7460 GN=Arp1 PE=3 SV=1	0	FALSE		522.8	81	31	4331	5	376	41.8	5.48	519.43	31.05	704.87	226.02	949.88	538.4	336.21	111.7	796.45	158.17	131.65	482.72	1701.8	1606.24	2418.55	570.82	90.14	21	8	20	19	22	21	18	15	21	15	17	22	22	21	22	20	16
FALSE	High	Master Protein	A0A087ZPV6	Uncharacterized protein OS=Apis mellifera OX=7460 GN=ArrL3 PE=4 SV=1	0	FALSE		99.23	49	14	61	14	393	43.8	5.27	0		25.62	2.64	5.27	12.78			19.22	2.27		8.85	20.63	5.47	32.36	2.04	0	1		8	1	2	6			6	1		5	8	3	7	1	1
FALSE	High	Master Protein	A0A088AGJ1	Uncharacterized protein OS=Apis mellifera OX=7460 GN=Atp5i PE=4 SV=1	0	FALSE		22.152	40	4	54	4	84	9.8	9.74	5.81		5.93	0	10.32	0	1.91		8.87			7.83	6.58	6.47	9.18	0		2		2	3	2	3	2		3			3	3	1	2	2
FALSE	High	Master Protein	A0A088AM30	Uncharacterized protein OS=Apis mellifera OX=7460 GN=ATPsyn-Cf6 PE=4 SV=1	0	FALSE		15.088	21	3	31	3	95	11	9.41	2.37		6.56	12.9	6.36	1.67	8.49	2.18	2.57	1.77		4.84		8.63		4.51		1		2	3	3	2	3	1	1	2		2		2		2
FALSE	High	Master Protein	A0A088AKM9	Uncharacterized protein OS=Apis mellifera OX=7460 GN=baf PE=4 SV=1	0	FALSE		21.96	59	4	22	4	90	10.1	5.45			6.64	2.48	9.75	4.44			9.97	3.43		3.06	4.05	3.68	7.75	2.32	0			2	1	2	1			2	2		1	2	1	2	2	1
FALSE	High	Master Protein	A0A0B4J2N5	Uncharacterized protein OS=Apis mellifera OX=7460 GN=bel PE=3 SV=1	0	FALSE		13.999	7	4	4	4	701	78.6	8.95	0														8.8			1														3
FALSE	High	Master Protein	A0A088ASX2	Uncharacterized protein OS=Apis mellifera OX=7460 GN=bur PE=4 SV=1	0	FALSE		9.454	3	1	1	1	718	78.7	7.42															3.52																	1
FALSE	High	Master Protein	A0A088AAI5	Uncharacterized protein OS=Apis mellifera OX=7460 GN=Catsup PE=4 SV=1	0	FALSE		6.37	9	3	6	3	404	45.5	6.4					0				2.11	0					2.3							1				2	1					1
FALSE	High	Master Protein	A0A088AGP1	Uncharacterized protein OS=Apis mellifera OX=7460 GN=Cct5 PE=3 SV=1	0	FALSE		83.793	42	17	43	17	544	59.4	6.02	7.61			1.61	2.49				20.3		2.35		8.21	5.91	20.22	6.65		3			1	1				9		2		4	2	7	8
FALSE	High	Master Protein	A0A0B4J2M3	Uncharacterized protein OS=Apis mellifera OX=7460 GN=Cdc42 PE=4 SV=1	0	FALSE		36.211	42	6	30	3	191	21.2	6.55	3.41		13.18	0	8.87	1.92			6.57	0		2.55	3.51	2.07	7.88			2		4	1	3	1			3	1		2	2	2	2
FALSE	High	Master Protein	A0A087ZSF4	Uncharacterized protein OS=Apis mellifera OX=7460 GN=chb PE=4 SV=1	0.008	FALSE		2.802	1	1	1	1	1301	144.9	9.42									2.15																	1
FALSE	High	Master Protein	A0A087ZWC4	Uncharacterized protein OS=Apis mellifera OX=7460 GN=cib PE=4 SV=1	0	FALSE		11.694	27	3	5	3	166	18.5	5.62								0									0								2									1
FALSE	High	Master Protein	A0A087ZS24	Uncharacterized protein OS=Apis mellifera OX=7460 GN=Clic PE=4 SV=1	0	FALSE		54.791	55	10	65	10	260	29.9	6.19	0		9.22	2.18	2.22	15.33		0	13.81	0	4.62	11.66		2.56	9.99	10.09	1.75	3		2	2	1	6		1	3	2	5	4		3	3	6	4
FALSE	High	Master Protein	A0A087ZVP7	Uncharacterized protein OS=Apis mellifera OX=7460 GN=Cox4I1 PE=4 SV=1	0	FALSE		74.727	64	10	263	10	168	19.1	9.35	34.35		29.03	31.24	47.37	36.37	19.29	4.17	28.39	16.01	2.1	28.61	50.5	100.16	120.12	25.75	5.86	7		5	6	7	5	5	1	5	5	1	5	5	7	6	6	3
FALSE	High	Master Protein	A0A087ZZU9	Uncharacterized protein OS=Apis mellifera OX=7460 GN=Cox5a PE=4 SV=1	0	FALSE		56.157	63	7	194	7	152	17.6	5.92	32.9		36.9	39.71	40.83	42.41	31.37	2.35	44.02	22.85	0	36.59	70.26	40.18	47.28	17.28	0	4		5	6	5	5	5	2	6	4	1	5	3	4	6	4	1
FALSE	High	Master Protein	A0A088A8C7	Uncharacterized protein OS=Apis mellifera OX=7460 GN=Cox5b PE=4 SV=1	0	FALSE		84.601	56	6	154	6	122	13.9	8.32	30.09		41.51	37.38	49.6	45.43	21.19		41.59	7.24	3.79	30.9	11.34	64.11	38.5	14.08	0	3		4	4	4	5	3		5	3	2	4	2	6	4	3	1
FALSE	High	Master Protein	A0A088AQ34	Uncharacterized protein OS=Apis mellifera OX=7460 GN=Cox6a1 PE=3 SV=1	0	FALSE		81.336	73	6	239	6	114	13.4	9	10.41		39.63	13.25	55.62	44.71	20.39		72.14	7.29		45.54	20.66	32.43	123.04	5.88	0	3		6	5	6	5	5		5	4		4	5	2	4	3	1
FALSE	High	Master Protein	A0A087ZR01	Uncharacterized protein OS=Apis mellifera OX=7460 GN=Cpap3-c PE=4 SV=1	0	FALSE		113.847	77	15	86	15	269	29.5	5.01	113.97			2.68			6.3	14.54								0	2.09	15			2			4	9								2	4
FALSE	High	Master Protein	A0A087ZT04	Uncharacterized protein OS=Apis mellifera OX=7460 GN=Cpap3-d PE=4 SV=1	0	FALSE		61.759	40	7	44	7	232	25.4	6.11	47.59		14.37			6.65	3.64	2.84	3.06			3.92		0	3.45	0	0	6		5			2	2	2	1			1		2	1	2	3
FALSE	High	Master Protein	A0A088AMM7	Uncharacterized protein OS=Apis mellifera OX=7460 GN=Cpap3-e PE=4 SV=1	0	FALSE		153.403	59	10	246	10	259	29.1	5.06			213.28	14.48	19.79	89.57	13.95		35.87	0		66.58	38.1	11.41	47.99		23.61			10	5	7	9	4		6	1		8	7	5	8		7
FALSE	High	Master Protein	A0A088AFI7	Uncharacterized protein OS=Apis mellifera OX=7460 GN=CPF2 PE=4 SV=1	0.006	FALSE		3.328	6	1	4	1	172	16.3	10.01																3.77	0																1	1
FALSE	High	Master Protein	A0A088ABN3	Uncharacterized protein OS=Apis mellifera OX=7460 GN=CPR1 PE=4 SV=1	0	FALSE		19.946	63	6	15	5	216	21.6	7.47	5.08			1.8	4.99					6.74								1			1	1					6
FALSE	High	Master Protein	A0A088AMU2	Uncharacterized protein OS=Apis mellifera OX=7460 GN=CPR16 PE=4 SV=1	0	FALSE		120.65	59	17	65	17	327	35.8	6.92							133.02																	17
FALSE	High	Master Protein	A0A088A4U6	Uncharacterized protein OS=Apis mellifera OX=7460 GN=CPR17 PE=4 SV=1	0	FALSE		25.261	27	3	52	3	158	17.5	6.3			29.38	0		11.1	22.98	0	3.67			6.26	12.02	8.62	11.83	6.68	14.59			3	1		2	2	1	2			2	2	1	2	2	2
FALSE	High	Master Protein	A0A088AG49	Uncharacterized protein OS=Apis mellifera OX=7460 GN=CPR19 PE=4 SV=1	0	FALSE		15.172	15	3	5	3	234	26.3	6.73	12.49																	3
FALSE	High	Master Protein	A0A088ABM3	Uncharacterized protein OS=Apis mellifera OX=7460 GN=CPR2 PE=4 SV=1	0	FALSE		36.034	45	7	20	6	264	26.4	8.28	4			2.37	2.07					19.37								2			1	2					7
FALSE	High	Master Protein	A0A088AMJ8	Uncharacterized protein OS=Apis mellifera OX=7460 GN=CPR23 PE=4 SV=1	0	FALSE		56.772	48	7	34	7	191	21.4	7.64	11.81						90.69											2						7
FALSE	High	Master Protein	A0A088A956	Uncharacterized protein OS=Apis mellifera OX=7460 GN=CPR24 PE=4 SV=1	0	FALSE		127.178	83	10	129	10	171	19.2	7.33							350.36																	10
FALSE	High	Master Protein	A0A087ZUU1	Uncharacterized protein OS=Apis mellifera OX=7460 GN=CPR25 PE=4 SV=1	0	FALSE		5.474	4	1	7	1	268	25.1	5.2	11.92						4.53								3.28			1						1								1
FALSE	High	Master Protein	A0A088AC28	Uncharacterized protein OS=Apis mellifera OX=7460 GN=CPR26 PE=4 SV=1	0	FALSE		21.231	18	2	7	2	189	21.1	6.44	8.59						4.99											2						2
FALSE	High	Master Protein	A0A088AG34	Uncharacterized protein OS=Apis mellifera OX=7460 GN=CPR27 PE=4 SV=1	0	FALSE		37.783	32	6	13	6	231	26.1	8	34.62																	6
FALSE	High	Master Protein	A0A088ABN1	Uncharacterized protein OS=Apis mellifera OX=7460 GN=CPR4 PE=4 SV=1	0	FALSE		24.283	64	5	8	5	123	13.2	8.13	3.11			0						9.74								1			1						4
FALSE	High	Master Protein	A0A087ZP95	Uncharacterized protein OS=Apis mellifera OX=7460 GN=CPR6 PE=4 SV=1	0	FALSE		24.691	36	4	9	4	188	20.6	6.47	6.56						4.65			0								3						2			1
FALSE	High	Master Protein	A0A088AKM4	Uncharacterized protein OS=Apis mellifera OX=7460 GN=CREG PE=4 SV=1	0	FALSE		16.069	16	3	7	3	290	33.7	7.55	2.28							3.59			0							1							3			1
FALSE	High	Master Protein	A0A087ZPK0	Uncharacterized protein OS=Apis mellifera OX=7460 GN=Cryl1 PE=4 SV=1	0	FALSE		85.531	67	16	76	16	317	35.8	7.03	46.81			4.01		4.46	2.02	23.88		1.6	1.62	4.78	5.86		8.48	11.9	3.42	12			5		2	3	12		2	4	3	3		3	6	5
FALSE	High	Master Protein	A0A087ZWM2	Uncharacterized protein OS=Apis mellifera OX=7460 GN=CtBP PE=3 SV=1	0.009	FALSE		2.625	4	1	1	1	472	49.7	7.09																0																	1
FALSE	High	Master Protein	A0A088A988	Uncharacterized protein OS=Apis mellifera OX=7460 GN=CTL4 PE=4 SV=1	0	FALSE		167.142	15	35	60	35	3510	383.4	5.17	0		79.88		2.57	5.91							7.61		22.71	0	0	1		22		1	3							11		12	1	2
FALSE	High	Master Protein	A0A088A503	Uncharacterized protein OS=Apis mellifera OX=7460 GN=Cyc1 PE=4 SV=1	0	FALSE		120.366	32	7	207	7	311	34.9	8.12	45.66		54.41	38.42	81.21	53.29	22.88		66.05	10.54		43.83	39.78	45.64	70.95	13.82	0	6		7	7	7	7	5		7	4		7	4	4	4	4	1
FALSE	High	Master Protein	A0A088AIK9	Uncharacterized protein OS=Apis mellifera OX=7460 GN=Cyp4g11 PE=3 SV=1	0	FALSE		53.195	28	11	29	10	560	63.3	8.38	48.1	0		0	1.64													10	2		1	3
FALSE	High	Master Protein	A0A088AEJ9	Uncharacterized protein OS=Apis mellifera OX=7460 GN=CYP6AS4 PE=3 SV=1	0	FALSE		80.241	36	17	49	15	501	57.8	8.9			15.78		0	4.09			29.76				0	13.41	28.48	3.78				8		1	3			12				1	4	9	3
FALSE	High	Master Protein	A0A088AEK7	Uncharacterized protein OS=Apis mellifera OX=7460 GN=CYP6AS7 PE=3 SV=1	0	FALSE		41.199	25	10	33	8	505	59	8.87			15.8	0	2.71	3.32			6.06	0	0	2.42	3.36	3.06	9.74					9	1	2	1			4	1	1	2	1	1	4
FALSE	High	Master Protein	A0A087ZXU5	Uncharacterized protein OS=Apis mellifera OX=7460 GN=CYP9Q1 PE=3 SV=1	0	FALSE		79.086	44	16	35	16	510	58.8	8.72			55.34			18.67							4.08		7.68					11			7							2		4
FALSE	High	Master Protein	A0A087ZXV8	Uncharacterized protein OS=Apis mellifera OX=7460 GN=CYP9Q2 PE=3 SV=1	0	FALSE		101.574	41	17	98	17	532	60.9	8.38	11.07		77.97	8.4	2.77	23.42			12.15	1.71		0	8.85	10.02	25.43	0		5		15	2	2	8			5	2		1	5	3	5	1
FALSE	High	Master Protein	A0A087ZXV9	Uncharacterized protein OS=Apis mellifera OX=7460 GN=CYP9Q3 PE=3 SV=1	0	FALSE		112.813	52	23	96	23	517	58.9	8.41			99.72			20.66			10.23	0		4.48	47.56		12.86					20			8			3	1		4	8		6
FALSE	High	Master Protein	A0A088ARQ2	Uncharacterized protein OS=Apis mellifera OX=7460 GN=Dbp80 PE=4 SV=1	0	FALSE		26.06	16	7	17	7	475	53.2	6.48	2.59			2.04	2.19	2.11			2.96			7.16	1.88		4.4	0		3			1	1	1			1			5	1		2	1
FALSE	High	Master Protein	A0A088ACJ2	Uncharacterized protein OS=Apis mellifera OX=7460 GN=Dctn2 PE=4 SV=1	0	FALSE		18.245	10	3	5	3	405	46	5.02					0									4.97	7.6							1									1	2
FALSE	High	Master Protein	A0A088A3X5	Uncharacterized protein OS=Apis mellifera OX=7460 GN=Ddc PE=3 SV=1	0.01	FALSE		2.478	3	1	1	1	480	54.7	6.84															0																	1
FALSE	High	Master Protein	A0A088AGA6	Uncharacterized protein OS=Apis mellifera OX=7460 GN=Dhpr PE=4 SV=1	0	FALSE		29.66	45	7	23	1	237	25.7	8.76	15.05			4.24				4.12		0	0		1.64			7.75	1.69	7			2				2		1	1		1			3	3
FALSE	High	Master Protein	A0A088AAD0	Uncharacterized protein OS=Apis mellifera OX=7460 GN=DHRS4 PE=4 SV=1	0	FALSE		5.342	7	1	1	1	272	29.8	9.29									2.37																	1
FALSE	High	Master Protein	A0A088A5J1	Uncharacterized protein OS=Apis mellifera OX=7460 GN=Droj2 PE=3 SV=1	0	FALSE		89.272	50	13	99	13	399	44.8	6.61	12.89		15.77	1.91	17.33	31.69		0	35.11		5.64	23.79	14.97	18.29	18.64	8.4		6		5	4	3	8		1	8		5	6	4	6	6	2
FALSE	High	Master Protein	A0A088A7W1	Uncharacterized protein OS=Apis mellifera OX=7460 GN=Drp1 PE=3 SV=1	0	FALSE		104.858	42	20	80	20	739	83	7.33	4.03		5.07	0	8.75	21.24			33.15		0	8.79	4.62	13.36	32.51	1.64		6		3	1	5	8			13		4	7	4	7	11	3
FALSE	High	Master Protein	A0A088A558	Uncharacterized protein OS=Apis mellifera OX=7460 GN=ebony PE=4 SV=1	0	FALSE		44.29	16	9	12	9	860	98.2	5.15									4.91		0	0	8.48	1.91	2.23	0										3		1	1	2	2	1	1
FALSE	High	Master Protein	A0A087ZNZ9	Uncharacterized protein OS=Apis mellifera OX=7460 GN=Echs1 PE=3 SV=1	0	FALSE		100.657	44	12	186	12	295	32.5	9.06	58.97		11.15	1.74		22.25		1.72	40.97	0	46.98	23.42	37.57	17.7	70.64	40.31	5.85	11		6	1		7		4	11	3	9	9	7	4	12	9	5
FALSE	High	Master Protein	A0A087ZVI0	Uncharacterized protein OS=Apis mellifera OX=7460 GN=eEF1delta PE=3 SV=1	0	FALSE		15.728	10	3	13	3	426	48.1	5.95					2.58	1.94		0	5.38			5.43	2.19	5.35		4.49	0					1	1		1	2			2	1	1		2	1
FALSE	High	Master Protein	A0A088A6Z1	Uncharacterized protein OS=Apis mellifera OX=7460 GN=Ef1beta PE=4 SV=1	0	FALSE		48.584	47	7	47	7	217	24.6	4.79	12		2.2	2.52	5.09	6.46		2.27	11.3	0	3.81	7.83	10.18	12.43	9.57	7.08	2.18	2		1	2	2	2		2	3	1	2	3	4	3	2	2	1
FALSE	High	Master Protein	A0A088AW55	Uncharacterized protein OS=Apis mellifera OX=7460 GN=eIF-4E PE=3 SV=1	0	FALSE		16.704	17	2	3	2	213	24.8	5.68	0														3.56	1.74		1														1	1
FALSE	High	Master Protein	A0A088AP58	Uncharacterized protein OS=Apis mellifera OX=7460 GN=elm PE=4 SV=1	0	FALSE		6.036	14	1	1	1	189	21.7	4.89														2.17																	1
FALSE	High	Master Protein	A0A088AUZ0	Uncharacterized protein OS=Apis mellifera OX=7460 GN=Ero1L PE=4 SV=1	0	FALSE		5.619	5	2	3	2	471	55	7.06						0			2.01					1.7									1			1					1
FALSE	High	Master Protein	A0A088APW3	Uncharacterized protein OS=Apis mellifera OX=7460 GN=fax PE=4 SV=1	0	FALSE		91.374	44	16	130	16	391	44.6	5.64	16.65	0	29.01	48.32	65.29	16.32			21.43	12.82		2.09	13.07		5.17			6	2	8	11	13	4			10	9		2	7		3
FALSE	High	Master Protein	A0A088ALP1	Uncharacterized protein OS=Apis mellifera OX=7460 GN=Fib PE=3 SV=1	0	FALSE		55.584	38	9	32	9	310	32.3	10.02	7.26		4.75		2.87	4.94			25.22	0		6.82	2.38	3.95	17.61	7.34		3		1		1	2			5	1		3	2	1	5	4
FALSE	High	Master Protein	A0A088ALH6	Uncharacterized protein OS=Apis mellifera OX=7460 GN=Fim PE=4 SV=1	0	FALSE		15.535	9	5	6	5	631	70.7	5.55	1.68									0					2.18			3									2					1
FALSE	High	Master Protein	A0A088AFK9	Uncharacterized protein OS=Apis mellifera OX=7460 GN=Fmr1 PE=4 SV=1	0	FALSE		20.151	7	4	6	4	621	69.4	8.57													1.98	3.38	6.54															2	1	3
FALSE	High	Master Protein	A0A088AEW8	Uncharacterized protein OS=Apis mellifera OX=7460 GN=Gad1 PE=3 SV=1	0	FALSE		7.874	5	2	2	2	491	55.7	6.65														2.12																	2
FALSE	High	Master Protein	A0A088AFL5	Uncharacterized protein OS=Apis mellifera OX=7460 GN=GstD1 PE=4 SV=1	0	FALSE		78.283	55	11	82	11	240	27.6	7.88	19.7	2.13	38.87	6.26		2.29	1.74	5.91	20.2	0	1.61	2.1	6	2.19	8.09		0	8	2	8	4		4	1	5	9	2	3	2	2	1	3		2
FALSE	High	Master Protein	A0A088AV36	Uncharacterized protein OS=Apis mellifera OX=7460 GN=GST-mic1 PE=4 SV=1	0	FALSE		32.674	31	4	88	4	149	17.1	9.74	21.81		32.77	13.91	24.07	11	3.75		23.19	4.72		14.93	15.49	9.25	18.15	4.25	3.67	4		4	2	4	3	1		4	2		3	2	1	2	1	1
FALSE	High	Master Protein	A0A088A0S0	Uncharacterized protein OS=Apis mellifera OX=7460 GN=GstO1 PE=3 SV=1	0	FALSE		5.2	10	2	5	2	241	28	6.95				0				0		0											1				2		2
FALSE	High	Master Protein	A0A087ZVS9	Uncharacterized protein OS=Apis mellifera OX=7460 GN=GstT1 PE=3 SV=1	0	FALSE		25.126	31	6	16	6	230	27.2	8.7	3.26		5.21			1.83					0	0	4.61	1.89	6.57	0		1		3			1					2	1	3	1	3	1
FALSE	High	Master Protein	A0A088ARD0	Uncharacterized protein OS=Apis mellifera OX=7460 GN=Hmt-1 PE=4 SV=1	0	FALSE		21.172	6	3	8	3	818	93.2	8.82			7.07		0				0					3.27	8.8					2		1				1					1	2
FALSE	High	Master Protein	A0A087ZTY7	Uncharacterized protein OS=Apis mellifera OX=7460 GN=Hsc70-5 PE=3 SV=1	0	FALSE		245.705	47	28	374	28	687	75.4	6.76	109.74		67.63	9.11	32.08	56.25	1.64	5.2	126.33	3.4	44.25	66.38	71.12	117.33	165.27	45.02	0	22		16	6	9	13	1	6	22	6	17	21	15	17	20	16	3
FALSE	High	Master Protein	A0A088AGW8	Uncharacterized protein OS=Apis mellifera OX=7460 GN=Hsc70cb PE=4 SV=1	0	FALSE		166.995	46	30	122	30	867	97.7	6.04	23.71			12.47	0	2.59		0	47.38	2.05	13.79	3.75	23.68	37.05	58.92	6.38		14			6	1	3		3	16	1	9	2	13	10	15	7
FALSE	High	Master Protein	A0A088A4Z4	Uncharacterized protein OS=Apis mellifera OX=7460 GN=IGFn3-12 PE=4 SV=1	0	FALSE		11.34	4	3	5	3	778	87.2	6.51				1.74		1.86			2.53						4.49						1		1			1						2
FALSE	High	Master Protein	A0A088A0C7	Uncharacterized protein OS=Apis mellifera OX=7460 GN=IGFn3-7 PE=4 SV=1	0	FALSE		271.727	41	38	228	38	1251	139.7	5.57	9.64		129.57	21.51	43.2	54.14		0	45.71	8.01		10.09	43.56	11.34	122.53	8.31	3.87	5		25	14	13	18		1	15	10		5	16	5	25	6	4
FALSE	High	Master Protein	A0A088ACY6	Uncharacterized protein OS=Apis mellifera OX=7460 GN=jagn PE=4 SV=1	0	FALSE		15.144	15	2	7	2	192	22.6	9.01			0		3.09	3.55			4.32			3.15			3.25					1		1	1			2			1			1
FALSE	High	Master Protein	A0A088AUH9	Uncharacterized protein OS=Apis mellifera OX=7460 GN=Kr-h2 PE=4 SV=1	0	FALSE		26.336	31	6	29	6	252	29.1	9.99			7.44	0	10.02	1.73			8.97			4.16	0	4.49	11.49	1.87	4.08			3	1	2	1			5			3	1	1	2	2	3
FALSE	High	Master Protein	A0A087ZV19	Uncharacterized protein OS=Apis mellifera OX=7460 GN=La PE=4 SV=1	0	FALSE		15.481	14	4	4	4	404	46.9	6.16	1.79													1.97		0		1													2		1
FALSE	High	Master Protein	A0A088AI31	Uncharacterized protein OS=Apis mellifera OX=7460 GN=LOC408280 PE=4 SV=1	0	FALSE		7.299	12	2	3	2	573	61.5	6.18								0		3.63															1		2
FALSE	High	Master Protein	A0A088AHF2	Uncharacterized protein OS=Apis mellifera OX=7460 GN=LOC408284 PE=4 SV=1	0	FALSE		32.528	20	5	41	5	332	35.3	7.81	0		6.31	1.99	11.49	9.77	0		10.29	0		6.58	2.62	1.68	18.09	1.62		2		3	3	3	4	1		3	1		2	2	2	3	3
FALSE	High	Master Protein	A0A088AHJ0	Uncharacterized protein OS=Apis mellifera OX=7460 GN=LOC408291 PE=3 SV=1	0	FALSE		82.222	60	16	61	16	399	42.5	8.75	5.63		9.92					5.19	14.42		2.62	9.06	9.25	36.68	10.93	4.63	0	3		4					5	4		3	4	6	10	3	4	4
FALSE	High	Master Protein	A0A088A1L3	Uncharacterized protein OS=Apis mellifera OX=7460 GN=LOC408349 PE=3 SV=1	0	FALSE		36.948	25	9	30	9	432	49.2	9.26	2.35		7.82		12.35	2.53			6.67			2.62	4.1		2.1			2		3		7	1			5			1	3		1
FALSE	High	Master Protein	A0A088A9D8	Uncharacterized protein OS=Apis mellifera OX=7460 GN=LOC408414 PE=3 SV=1	0	FALSE		427.31	73	35	703	33	284	32.1	4.78	75.95		216.49	5.25	178.77	146.41	161.14	10.57	272.17	23.95	2.41	171.3	51.57	310.18	218.16	125.87		15		26	1	22	23	27	8	29	9	1	26	11	23	25	25
FALSE	High	Master Protein	A0A087ZN21	Uncharacterized protein OS=Apis mellifera OX=7460 GN=LOC408432 PE=3 SV=1	0	FALSE		10.664	8	3	3	3	539	61.3	7.27				1.65																	3
FALSE	High	Master Protein	A0A087ZSF5	Uncharacterized protein OS=Apis mellifera OX=7460 GN=LOC408477 PE=4 SV=1	0	FALSE		21.064	25	5	57	5	185	22.4	9.74	2.62		8.51	3.88	8.71	5.74	3.72		3.78	0		4.27	10.33	3.6	11.11	0		3		5	4	3	3	3		3	1		4	4	1	3	1
FALSE	High	Master Protein	A0A087ZSB5	Uncharacterized protein OS=Apis mellifera OX=7460 GN=LOC408497 PE=4 SV=1	0	FALSE		15.566	5	4	6	4	1088	125	5.12									2.3				0		2.38											2				1		3
FALSE	High	Master Protein	A0A088AEV7	Uncharacterized protein OS=Apis mellifera OX=7460 GN=LOC408516 PE=4 SV=1	0	FALSE		38.012	43	7	83	7	209	23.6	9.16	17.86		0	3.69	5.71	9.3	2.01	20.2	0	5.86	4.07	21.82	5.96	5.67		7.43	6.83	6		1	2	3	4	3	6	2	2	4	6	1	2		4	2
FALSE	High	Master Protein	A0A088AGG3	Uncharacterized protein OS=Apis mellifera OX=7460 GN=LOC408538 PE=4 SV=1	0.007	FALSE		3.292	4	1	1	1	267	28.7	8.75			1.92																	1
FALSE	High	Master Protein	A0A088ASM7	Uncharacterized protein OS=Apis mellifera OX=7460 GN=LOC408547 PE=4 SV=1	0	FALSE		5.105	14	2	2	2	125	13.6	7.14				1.71					0												1					1
FALSE	High	Master Protein	A0A088A3U0	Uncharacterized protein OS=Apis mellifera OX=7460 GN=LOC408564 PE=4 SV=1	0	FALSE		4.04	2	1	2	1	648	73.1	9.19					1.73				2.63													1				1
FALSE	High	Master Protein	A0A087ZTI9	Uncharacterized protein OS=Apis mellifera OX=7460 GN=LOC408567 PE=3 SV=1	0	FALSE		97.343	41	14	160	14	417	46.5	8.31	44.61		17.5		5.65	16.92		11.09	55.17	4.78	37.86	20.36	7.26	54.45	63.47	30.22	5.37	10		5		2	4		6	11	3	10	6	2	8	11	11	5
FALSE	High	Master Protein	A0A088AC16	Uncharacterized protein OS=Apis mellifera OX=7460 GN=LOC408608 PE=4 SV=1	0	FALSE		62.247	32	6	104	6	181	19.4	7.18	63.55	17.39	45.62	1.89	8.86	35.06	2.29	12.66	17.81	1.81	11.58	5.05	5.14		12.7	9.66	16.77	6	4	5	2	2	4	1	2	4	2	2	2	2		2	2	3
FALSE	High	Master Protein	A0A088AUM2	Uncharacterized protein OS=Apis mellifera OX=7460 GN=LOC408672 PE=4 SV=1	0	FALSE		27.059	43	6	41	6	190	22	4.88	2.02	0	4.71	4.17		10.09	1.76	1.7	2.24	1.97	2.08	4.99	8.11	18.53		2.23	2.01	1	1	2	2		3	2	2	1	2	3	2	3	5		1	1
FALSE	High	Master Protein	A0A088AV37	Uncharacterized protein OS=Apis mellifera OX=7460 GN=LOC408677 PE=4 SV=1	0	FALSE		165.36	21	26	60	26	4696	537.6	8.28	8.61		7.65		0	7.98	4.15		23.38	0			7.78	16.91	74.18	0	2.6	2		3		1	3	4		5	1			4	5	20	1	1
FALSE	High	Master Protein	A0A088AGM2	Uncharacterized protein OS=Apis mellifera OX=7460 GN=LOC408721 PE=4 SV=1	0.007	FALSE		3.139	6	1	3	1	192	22	5.25					1.71							0		0								1							1		1
FALSE	High	Master Protein	A0A088A4D4	Uncharacterized protein OS=Apis mellifera OX=7460 GN=LOC408722 PE=4 SV=1	0	FALSE		96.76	52	12	59	11	315	36	7.97			0	101.87	3.89	3.59			3.31	1.76			0		0					1	12	2	1			2	3			1		1
FALSE	High	Master Protein	A0A088ADL7	Uncharacterized protein OS=Apis mellifera OX=7460 GN=LOC408817 PE=3 SV=1	0	FALSE		8.805	5	2	2	2	482	53.8	7.17														2.25																	2
FALSE	High	Master Protein	A0A088A015	Uncharacterized protein OS=Apis mellifera OX=7460 GN=LOC408851 PE=3 SV=1	0	FALSE		123.622	30	20	147	20	881	100.3	6.1	64.54	26.04	0	7.23	22.94	6.26	0	46.23	3.08	15.58	2.72	2.24	2.39		3.16	11.52	19.42	9	8	1	4	8	4	2	11	2	7	5	3	1		2	7	7
FALSE	High	Master Protein	A0A088A9R3	Uncharacterized protein OS=Apis mellifera OX=7460 GN=LOC408904 PE=3 SV=1	0	FALSE		222.256	68	23	384	23	539	59	8.47	93.4	0	60.14	4.56	60.54	62.44		0	87.37		82.86	44.9	48.85	83.37	131.3	78.35	1.74	19	1	15	6	11	15		1	18		21	14	15	13	16	16	7
FALSE	High	Master Protein	A0A087ZYN5	Uncharacterized protein OS=Apis mellifera OX=7460 GN=LOC408920 PE=4 SV=1	0	FALSE		86.768	32	15	43	15	626	70.1	8.38			22.47		2.7	4.58			36.7				7.05	13.17	31.31	1.85				6		2	2			9				3	6	8	1
FALSE	High	Master Protein	A0A087ZSI7	Uncharacterized protein OS=Apis mellifera OX=7460 GN=LOC408970 PE=4 SV=1	0	FALSE		12.533	4	3	3	3	962	104.7	6.02	4.43							0										2							1
FALSE	High	Master Protein	A0A087ZUS7	Uncharacterized protein OS=Apis mellifera OX=7460 GN=LOC409002 PE=4 SV=1	0	FALSE		203.695	81	13	147	13	174	18.6	9.29	514.54																	13
FALSE	High	Master Protein	A0A087ZVH6	Uncharacterized protein OS=Apis mellifera OX=7460 GN=LOC409016 PE=3 SV=1	0	FALSE		6.002	7	1	2	1	229	26	8.53						0			0														1			1
FALSE	High	Master Protein	A0A088A7W2	Uncharacterized protein OS=Apis mellifera OX=7460 GN=LOC409074 PE=3 SV=1	0.01	FALSE		2.573	4	1	4	1	207	21.6	9.03					0	0			0													1	1			1
FALSE	High	Master Protein	A0A088AV05	Uncharacterized protein OS=Apis mellifera OX=7460 GN=LOC409087 PE=4 SV=1	0	FALSE		82.77	46	17	127	17	366	41.2	7.4	4.33		21.83		47.74	20.99	3.96		39.24	0		15.7	31.42	12.74	50.52	2.24		1		7		13	7	2		10	1		5	11	5	6	2
FALSE	High	Master Protein	A0A088ATI7	Uncharacterized protein OS=Apis mellifera OX=7460 GN=LOC409126 PE=4 SV=1	0	FALSE		43.762	57	10	66	10	214	23.7	6.68	7.52		23.52	17.2	19.21	17.46	0		18.6	5.33	0	10.92	12.53	4.94	25.91	5.76		2		6	5	4	4	1		4	3	1	5	3	2	6	2
FALSE	High	Master Protein	A0A088ATB5	Uncharacterized protein OS=Apis mellifera OX=7460 GN=LOC409189 PE=3 SV=1	0	FALSE		4.677	3	1	3	1	339	36.3	9.85			0									0			1.95					1									1			1
FALSE	High	Master Protein	A0A087ZQI7	Uncharacterized protein OS=Apis mellifera OX=7460 GN=LOC409340 PE=4 SV=1	0	FALSE		15.899	16	4	10	4	364	39.6	4.68	6.44				1.68	2.22					0	2.27				0		2				1	1					1	2				2
FALSE	High	Master Protein	A0A088ART2	Uncharacterized protein OS=Apis mellifera OX=7460 GN=LOC409384 PE=3 SV=1	0	FALSE		284.986	66	31	356	31	570	60.4	5.83	56.4	0	86.91	24.44	35.12	78.73	2.06	15.47	118.24	4.65	12.84	48.8	43.18	172.57	64.67	40.26	4.04	16	1	17	13	12	20	2	10	21	7	12	14	13	24	16	13	8
FALSE	High	Master Protein	A0A088A2R1	Uncharacterized protein OS=Apis mellifera OX=7460 GN=LOC409411 PE=4 SV=1	0	FALSE		7.936	8	2	4	2	259	29.3	9.23			2.04						3.8						2.28					1						2						1
FALSE	High	Master Protein	A0A088ABA5	Uncharacterized protein OS=Apis mellifera OX=7460 GN=LOC409457 PE=4 SV=1	0	FALSE		6.579	1	3	5	3	2646	293.7	7.53						0			1.87			0			0								1			2			1			1
FALSE	High	Master Protein	A0A088A5A6	Uncharacterized protein OS=Apis mellifera OX=7460 GN=LOC409481 PE=3 SV=1	0	FALSE		88.503	65	11	177	10	182	20.7	6.58	43.09	6.05	55.11	28.88	24.11	31.78	1.68	3.68	23.99	12.91	22.87	49.95	13.99	6.31	24.03	13.59	6.09	8	3	10	6	6	7	3	2	7	6	7	8	6	3	5	4	4
FALSE	High	Master Protein	A0A088A4K3	Uncharacterized protein OS=Apis mellifera OX=7460 GN=LOC409485 PE=3 SV=1	0	FALSE		7.595	2	1	1	1	890	98.8	6.95														3.56																	1
FALSE	High	Master Protein	A0A088A241	Uncharacterized protein OS=Apis mellifera OX=7460 GN=LOC409494 PE=3 SV=1	0	FALSE		5.899	5	1	1	1	300	32.4	9.48												3.29																	1
FALSE	High	Master Protein	A0A087ZT28	Uncharacterized protein OS=Apis mellifera OX=7460 GN=LOC409529 PE=4 SV=1	0	FALSE		51.131	50	9	53	8	199	23	7.77	0		18.5	1.73	11.12	21.14	9.07		26.72	2.33		8.21	2.5	9.35	27.14	3.26		1		4	1	2	5	5		5	2		3	1	2	6	2
FALSE	High	Master Protein	A0A087ZQ92	Uncharacterized protein OS=Apis mellifera OX=7460 GN=LOC409547 PE=4 SV=1	0.008	FALSE		2.712	5	1	1	1	385	43	5.1																0																	1
FALSE	High	Master Protein	A0A088A2R3	Uncharacterized protein OS=Apis mellifera OX=7460 GN=LOC409586 PE=3 SV=1	0	FALSE		52.556	49	9	99	9	145	17.4	9.42	4.89		4.1	9.32	30.02	23.91	5.5		27.22	2.88		21.08	0	19.29	31.05	0		2		2	5	7	8	5		5	1		6	1	3	6	3
FALSE	High	Master Protein	A0A087ZVB3	Uncharacterized protein OS=Apis mellifera OX=7460 GN=LOC409602 PE=4 SV=1	0	FALSE		25.586	27	6	24	6	245	28	5.12	16			6.43				2.49		0						2.05	0	6			5				2		2						2	2
FALSE	High	Master Protein	H9KQA6	Uncharacterized protein OS=Apis mellifera OX=7460 GN=LOC409613 PE=3 SV=1	0	FALSE		103.926	76	12	213	12	193	21.8	6.93	29.46		53.33	22.88	47.28	64.33	2.03	0	66.53	10.58	17.22	55.32	25.61	16.89	50.52	14.71		6		9	7	8	10	3	1	9	4	7	10	4	4	8	6
FALSE	High	Master Protein	A0A088AVV4	Uncharacterized protein OS=Apis mellifera OX=7460 GN=LOC409668 PE=4 SV=1	0.001	FALSE		3.954	4	1	3	1	277	31.2	5.34	2.57					2.3										1.94		1					1										1
FALSE	High	Master Protein	A0A088AFJ0	Uncharacterized protein OS=Apis mellifera OX=7460 GN=LOC409712 PE=3 SV=1	0	FALSE		30.216	19	6	7	6	414	45.9	8.1									3.54				3.55		10.05											1				2		4
FALSE	High	Master Protein	A0A088A5E4	Uncharacterized protein OS=Apis mellifera OX=7460 GN=LOC409739 PE=4 SV=1	0	FALSE		39.03	15	6	10	6	493	56.6	7.24					0				6.38					1.7	10.23	0						1				3					1	3	1
FALSE	High	Master Protein	A0A088A3I9	Uncharacterized protein OS=Apis mellifera OX=7460 GN=LOC409755 PE=4 SV=1	0	FALSE		84.733	56	15	81	15	365	41.7	6.49	8.8		7.07	0	4.76	36.49	1.7		39.2		3.8	13.21	12.9	7.56	20.02	4.26		5		3	1	3	10	1		12		3	7	6	4	7	5
FALSE	High	Master Protein	A0A088AG46	Uncharacterized protein OS=Apis mellifera OX=7460 GN=LOC409776 PE=4 SV=1	0	FALSE		152.304	59	17	47	17	540	60.3	9.07	147.13		7.08															17		2
FALSE	High	Master Protein	A0A088AAV5	Uncharacterized protein OS=Apis mellifera OX=7460 GN=LOC409809 PE=3 SV=1	0	FALSE		151.479	56	22	99	22	534	57.9	6.64	29.11		7.67	0	11.2	9.79			23	0	2.41	0	4.32	30.51	55.15	6.93		9		3	1	5	5			7	1	5	1	7	7	13	12
FALSE	High	Master Protein	A0A087ZZS7	Uncharacterized protein OS=Apis mellifera OX=7460 GN=LOC409866 PE=4 SV=1	0	FALSE		29.031	16	4	12	3	403	46.2	6.24	13.16			4.29				2.19	5.87	2.46	2.89				2.25			2			1				1	2	1	1				1
FALSE	High	Master Protein	A0A087ZWE0	Uncharacterized protein OS=Apis mellifera OX=7460 GN=LOC409870 PE=4 SV=1	0	FALSE		13.751	12	4	20	4	373	41.6	6.79	1.65		7.76		3.94	0			8.86			0	2.38		6.03			1		2		4	1			4			1	1		1
FALSE	High	Master Protein	A0A088AT91	Uncharacterized protein OS=Apis mellifera OX=7460 GN=LOC409886 PE=4 SV=1	0.001	FALSE		3.859	3	1	7	1	338	39.4	7.55				0		3.93						1.94		1.94	2.48	1.75					1		1						1		1	1	1
FALSE	High	Master Protein	A0A088AT65	Uncharacterized protein OS=Apis mellifera OX=7460 GN=LOC409905 PE=4 SV=1	0	FALSE		15.461	11	3	6	3	348	40.4	9.52				0	2.18				3.17						3.16						1	2				1						2
FALSE	High	Master Protein	A0A088A8I9	Uncharacterized protein OS=Apis mellifera OX=7460 GN=LOC409930 PE=4 SV=1	0	FALSE		71.948	64	6	195	6	121	14.3	9.79	28.46		40.3	22.31	63.61	50.01	18.14	0	40.55	9.75		33.71	29.28	26.45	113.2	8.97		3		5	3	6	5	3	1	5	3		5	4	3	5	4
FALSE	High	Master Protein	A0A088AGT8	Uncharacterized protein OS=Apis mellifera OX=7460 GN=LOC409950 PE=4 SV=1	0	FALSE		28.655	7	9	16	9	1625	180.2	5.35	0				0	0		0		0			0		0	0	0	5				1	1		2		2			1		1	1	1
FALSE	High	Master Protein	A0A088AVD8	Uncharacterized protein OS=Apis mellifera OX=7460 GN=LOC409986 PE=4 SV=1	0	FALSE		245.113	61	34	321	34	727	80.5	6.93	53		62.65	2.04	19.64	54.84			113.87	0	42.37	34.35	18.67	64.68	146.73	92.38	5.43	15		19	4	7	20			27	1	22	15	8	13	21	27	7
FALSE	High	Master Protein	A0A088A820	Uncharacterized protein OS=Apis mellifera OX=7460 GN=LOC410022 PE=3 SV=1	0	FALSE		222.512	60	22	426	22	477	53.3	5.53	69.12		100.37	78.73	131.59	114.27	59.91	0	105.81	22.39	0	80.72	52.18	125.47	120.21	37.96		14		15	16	17	16	15	3	15	9	1	14	9	14	12	10
FALSE	High	Master Protein	A0A088A464	Uncharacterized protein OS=Apis mellifera OX=7460 GN=LOC410054 PE=4 SV=1	0	FALSE		40.722	26	9	23	9	529	58.4	5.21	6.33				0	1.62				0	1.62	1.62		10.76	0	4.68		3				1	3				1	2	1		4	1	4
FALSE	High	Master Protein	A0A087ZPT8	Uncharacterized protein OS=Apis mellifera OX=7460 GN=LOC410071 PE=3 SV=1	0	FALSE		11.123	16	3	4	3	307	34.1	5.27				0		3.07		0						0							1		1		1						1
FALSE	High	Master Protein	A0A088A3M1	Uncharacterized protein OS=Apis mellifera OX=7460 GN=LOC410115 PE=3 SV=1	0	FALSE		18.595	16	5	14	5	417	46.8	5.99	2.39		2.28		2.01	0			2.34			0	2.01		3.62	1.74		2		2		1	1			1			2	2		1	1
FALSE	High	Master Protein	A0A088AB41	Uncharacterized protein OS=Apis mellifera OX=7460 GN=LOC410165 PE=4 SV=1	0	FALSE		45.42	25	9	31	9	514	54.2	7.74	0		9.46	1.91		2.53			11.44		1.63	2.41	7.02	0	13.54			1		3	1		2			6		1	2	1	1	5
FALSE	High	Master Protein	A0A088AHR3	Uncharacterized protein OS=Apis mellifera OX=7460 GN=LOC410218 PE=4 SV=1	0	FALSE		38.472	28	4	26	4	192	21.3	6.18	2.77		8.46	2.35	16.93	8.22			9.42	0		2.4	1.77		7.43			1		2	2	3	2			1	1		1	1		1
FALSE	High	Master Protein	A0A088AWB2	Uncharacterized protein OS=Apis mellifera OX=7460 GN=LOC410244 PE=4 SV=1	0	FALSE		17.107	10	1	15	1	152	17.2	7.5	4.57		9.69		7.52	2.91							0		6.77	0	0	1		1		1	1							1		1	1	1
FALSE	High	Master Protein	A0A088A7D1	Uncharacterized protein OS=Apis mellifera OX=7460 GN=LOC410306 PE=3 SV=1	0	FALSE		44.012	53	8	63	7	180	20.4	7.37	9.05	2.61	17.45	9.28	12.76	11.02	1.68	2	8.64	3.96	4.61	22.38	4.94	1.9	13.19	4.31	2.44	2	2	5	3	5	2	1	1	3	1	1	6	2	1	3	2	1
FALSE	High	Master Protein	A0A088A1M5	Uncharacterized protein OS=Apis mellifera OX=7460 GN=LOC410325 PE=3 SV=1	0	FALSE		220.441	45	28	332	28	764	84.3	9.01	49.33		110.01	12.51	75.26	45.24			136.57	3.9	1.77	40.69	73.58	39.74	107.36	18.91		11		22	7	16	13			22	6	3	15	15	9	19	11
FALSE	High	Master Protein	A0A088AD75	Uncharacterized protein OS=Apis mellifera OX=7460 GN=LOC410373 PE=4 SV=1	0	FALSE		46.055	35	10	22	10	484	54.3	6.57				28.84	3.41					11.22											9	1					5
FALSE	High	Master Protein	A0A088AGR8	Uncharacterized protein OS=Apis mellifera OX=7460 GN=LOC410429 PE=4 SV=1	0	FALSE		5.592	6	1	5	1	244	26.9	5.83			2.75			2.46			4.81			1.95								1			1			1			1
FALSE	High	Master Protein	A0A088AF49	Uncharacterized protein OS=Apis mellifera OX=7460 GN=LOC410617 PE=3 SV=1	0	FALSE		4.674	5	2	5	2	431	48.9	9.88					0	0			0				1.88									1	1			1				1
FALSE	High	Master Protein	A0A088AGJ8	Uncharacterized protein OS=Apis mellifera OX=7460 GN=LOC410620 PE=3 SV=1	0	FALSE		263.862	59	31	537	14	640	70.3	5.82	133.61	2.78	53.78	33.57	63.32	92.48	17.49	25.99	114.5	16.3	83.7	52.26	119.71	138.48	236.16	92.75	7.39	20	2	11	13	11	16	7	14	19	12	21	13	20	18	22	20	6
FALSE	High	Master Protein	A0A087ZTT0	Uncharacterized protein OS=Apis mellifera OX=7460 GN=LOC410690 PE=4 SV=1	0	FALSE		21.672	14	4	13	4	394	44.2	7.77	0		0						1.6		0	0	2.17	0	2.77	0		2		1						1		2	1	2	1	1	2
FALSE	High	Master Protein	A0A088AUT9	Uncharacterized protein OS=Apis mellifera OX=7460 GN=LOC410793 PE=4 SV=1	0.008	FALSE		2.89	0	1	1	1	4361	499.9	6.67															2.83																	1
FALSE	High	Master Protein	A0A088AUS1	Uncharacterized protein OS=Apis mellifera OX=7460 GN=LOC410812 PE=4 SV=1	0	FALSE		15.769	25	3	17	2	194	22.1	8.12			5.52	3.95	5.46	5.01	2.21		2.62			2.09	2.5	5.71	9.67					2	1	1	2	1		1			1	1	1	2
FALSE	High	Master Protein	A0A088AUL6	Uncharacterized protein OS=Apis mellifera OX=7460 GN=LOC410816 PE=4 SV=1	0	FALSE		5.066	3	1	1	1	594	67.7	8.63									2.55																	1
FALSE	High	Master Protein	A0A088AH67	Uncharacterized protein OS=Apis mellifera OX=7460 GN=LOC410889 PE=4 SV=1	0.001	FALSE		3.912	4	1	1	1	232	27	9.83									2.47																	1
FALSE	High	Master Protein	A0A087ZR22	Uncharacterized protein OS=Apis mellifera OX=7460 GN=LOC410915 PE=3 SV=1	0	FALSE		43.403	19	4	82	4	264	27	8.18	0		22.4	51.49	30.22	11.96			43.3	43.46		3.93	13.48		16.06	0		1		2	3	3	1			2	4		1	2		2	1
FALSE	High	Master Protein	A0A088AVJ1	Uncharacterized protein OS=Apis mellifera OX=7460 GN=LOC410952 PE=3 SV=1	0	FALSE		31.051	26	6	14	6	317	36.1	9.28					3.33				16.26						5.13	0						3				5						2	1
FALSE	High	Master Protein	A0A087ZZ43	Uncharacterized protein OS=Apis mellifera OX=7460 GN=LOC411011 PE=4 SV=1	0	FALSE		14.245	13	3	16	2	381	44.2	7.88	2.2		1.67	4.3	4.63				4.61				5.74	5.07	5.51	2.25		1		1	1	1				3				2	1	2	1
FALSE	High	Master Protein	A0A087ZU42	Uncharacterized protein OS=Apis mellifera OX=7460 GN=LOC411141 PE=4 SV=1	0	FALSE		8.993	4	2	4	2	586	64.4	8.19			2.34						1.7			1.78								1						1			2
FALSE	High	Master Protein	A0A088ASZ7	Uncharacterized protein OS=Apis mellifera OX=7460 GN=LOC411285 PE=4 SV=1	0	FALSE		187.551	47	16	347	16	493	53.2	8.18	38.59	0	25.86	2.13	170.61	69.21	34.1	12.48	90.77	6	16.73	18.8	11.68	132.04	73.14	62.46		7	1	9	1	15	10	9	3	12	3	7	5	3	13	13	9
FALSE	High	Master Protein	A0A088AP17	Uncharacterized protein OS=Apis mellifera OX=7460 GN=LOC411295 PE=4 SV=1	0	FALSE		35.609	37	6	35	6	245	27.4	9.48	0		7.42	6.25	5.99	11.02			7.59			1.82	2.1	12.44	6.06	2.39	2.16	2		2	3	4	4			5			2	1	2	2	2	1
FALSE	High	Master Protein	A0A087ZUS6	Uncharacterized protein OS=Apis mellifera OX=7460 GN=LOC411317 PE=4 SV=1	0	FALSE		15.006	12	4	11	4	424	45.8	5.5								0								0	0								4								1	2
FALSE	High	Master Protein	A0A088AD26	Uncharacterized protein OS=Apis mellifera OX=7460 GN=LOC411378 PE=4 SV=1	0	FALSE		33.319	37	9	18	9	337	37.6	8.84	2.05					4.31						6.54		3.55		10.23	0	1					3						5		1		4	3
FALSE	High	Master Protein	A0A088ALS8	Uncharacterized protein OS=Apis mellifera OX=7460 GN=LOC411488 PE=4 SV=1	0	FALSE		4.283	1	1	1	1	1556	177.4	6.07					0																	1
FALSE	High	Master Protein	A0A088AN97	Uncharacterized protein OS=Apis mellifera OX=7460 GN=LOC411533 PE=4 SV=1	0	FALSE		16.16	12	4	13	4	365	42.9	7.34	3.93									3.32		2.67		2.09	4.81	2.6	1.91	1									2		1		1	2	3	2
FALSE	High	Master Protein	A0A087ZR82	Uncharacterized protein OS=Apis mellifera OX=7460 GN=LOC411664 PE=4 SV=1	0	FALSE		4.492	8	1	2	1	167	18.6	7.08				2.39																	1
FALSE	High	Master Protein	A0A088A7Y3	Uncharacterized protein OS=Apis mellifera OX=7460 GN=LOC411704 PE=4 SV=1	0	FALSE		8.442	6	2	12	1	356	40.3	6.43	2.2		0	4.3	4.63				2.17				3.13	5.07	2.62	2.25		1		1	1	1				1				1	1	1	1
FALSE	High	Master Protein	A0A088ADG3	Uncharacterized protein OS=Apis mellifera OX=7460 GN=LOC411730 PE=4 SV=1	0	FALSE		11.166	6	3	5	3	809	93.7	8.92									2.5				2.49		0											2				1		1
FALSE	High	Master Protein	A0A087ZY47	Uncharacterized protein OS=Apis mellifera OX=7460 GN=LOC411732 PE=4 SV=1	0	FALSE		25.059	20	4	11	4	275	30.7	8.87			1.98		6.66	0			2.55			0	5.44							1		2	1			2			1	1
FALSE	High	Master Protein	A0A088A108	Uncharacterized protein OS=Apis mellifera OX=7460 GN=LOC411863 PE=4 SV=1	0	FALSE		46.136	30	7	28	7	329	37.1	8.62			2.53		7.97	2.95			23.94			1.85	5.32		8.51	0				1		4	1			6			2	2		2	1
FALSE	High	Master Protein	A0A087ZYG3	Uncharacterized protein OS=Apis mellifera OX=7460 GN=LOC411889 PE=4 SV=1	0	FALSE		16.721	13	4	7	4	494	56.4	8.03			2.12						6.7											3						3
FALSE	High	Master Protein	A0A087ZV93	Uncharacterized protein OS=Apis mellifera OX=7460 GN=LOC411923 PE=3 SV=1	0	FALSE		27.988	7	6	11	5	1194	135.1	6.83			1.97		1.89	1.63			2.87				2.01	0	6.28					1		1	1			3				1	1	3
FALSE	High	Master Protein	A0A088AJJ6	Uncharacterized protein OS=Apis mellifera OX=7460 GN=LOC411989 PE=3 SV=1	0	FALSE		103.792	50	17	110	15	423	48.1	5.49	52.32		11.16	15.91	9.64	24.24		8.44	18.98	4.72	24.35	16.38	22.52	2.35	15.69	9.73	3.61	11		4	4	2	5		6	4	2	9	6	6	1	4	6	2
FALSE	High	Master Protein	A0A088A9I3	Uncharacterized protein OS=Apis mellifera OX=7460 GN=LOC412017 PE=4 SV=1	0.009	FALSE		2.69	5	1	1	1	318	35.9	9.31									0																	1
FALSE	High	Master Protein	A0A088AQ15	Uncharacterized protein OS=Apis mellifera OX=7460 GN=LOC412111 PE=4 SV=1	0	FALSE		20.329	7	5	6	5	1233	138.6	6.9			0						4.53				0	2.31	3.3					1						2				1	1	1
FALSE	High	Master Protein	A0A088AGW2	Uncharacterized protein OS=Apis mellifera OX=7460 GN=LOC412127 PE=4 SV=1	0	FALSE		10.297	14	2	2	2	169	18.4	9.16					0										3.44							1										1
FALSE	High	Master Protein	A0A088A023	Uncharacterized protein OS=Apis mellifera OX=7460 GN=LOC412232 PE=4 SV=1	0	FALSE		18.422	9	6	7	6	790	90.1	6.92	1.98							2.3	2.39							2.08		1							2	1							3
FALSE	High	Master Protein	A0A087ZV03	Uncharacterized protein OS=Apis mellifera OX=7460 GN=LOC412276 PE=4 SV=1	0	FALSE		19.131	26	6	15	6	297	33.3	9.06					0	2.85			4.49		2.32	0	1.73	0	3.18							1	2			1		2	1	3	1	3
FALSE	High	Master Protein	A0A088AT22	Uncharacterized protein OS=Apis mellifera OX=7460 GN=LOC412282 PE=3 SV=1	0	FALSE		35.537	8	7	8	7	1181	136.7	8						1.87			4.18						9.37								1			4						3
FALSE	High	Master Protein	A0A087ZZP4	Uncharacterized protein OS=Apis mellifera OX=7460 GN=LOC412442 PE=3 SV=1	0	FALSE		16.204	18	4	18	3	325	36.7	9.14	0		4.09	0	7.21	1.99			4.56			2.36	0		7.76			1		2	1	3	1			3			2	1		2
FALSE	High	Master Protein	A0A088ASE3	Uncharacterized protein OS=Apis mellifera OX=7460 GN=LOC412526 PE=3 SV=1	0	FALSE		55.103	29	10	62	10	427	47.2	5.26	16.16		17.1	2.23	2.68	10.85			5.97	0	5.56	10.23	8.82	16	9.72	8.82	0	5		6	2	1	4			2	2	6	6	5	3	3	5	3
FALSE	High	Master Protein	A0A087ZZR1	Uncharacterized protein OS=Apis mellifera OX=7460 GN=LOC412543 PE=4 SV=1	0	FALSE		203.075	67	19	326	19	447	49	5.34	29.97		99.77	24.8	156.16	66.64	3.06	0	118.88	29.77	2.63	48.79	61.56	114.55	98.88	17.11	4.97	7		10	6	17	10	1	1	13	10	2	10	9	11	12	8	3
FALSE	High	Master Protein	A0A088AAI6	Uncharacterized protein OS=Apis mellifera OX=7460 GN=LOC412598 PE=4 SV=1	0	FALSE		21.223	11	4	6	4	457	52.2	7.84			1.85						2.53				0		3.54					2						1				1		2
FALSE	High	Master Protein	A0A088AAC0	Uncharacterized protein OS=Apis mellifera OX=7460 GN=LOC412607 PE=4 SV=1	0	FALSE		15.453	4	4	5	4	1173	131	8.38									1.76						5.48											3						2
FALSE	High	Master Protein	A0A087ZRN3	Uncharacterized protein OS=Apis mellifera OX=7460 GN=LOC412666 PE=4 SV=1	0.001	FALSE		3.943	4	1	2	1	275	31.7	9.36			2.21			2.03														1			1
FALSE	High	Master Protein	A0A088AH83	Uncharacterized protein OS=Apis mellifera OX=7460 GN=LOC412678 PE=3 SV=1	0	FALSE		15.322	21	5	7	5	329	36.3	9.39			2.18		0	0			2.43				2.23							2		2	1			1				1
FALSE	High	Master Protein	A0A088AK08	Uncharacterized protein OS=Apis mellifera OX=7460 GN=LOC412708 PE=4 SV=1	0	FALSE		18.331	25	5	7	5	228	25.9	7.44	0				0						0			2	5.06	0		1				1						1			1	2	1
FALSE	High	Master Protein	A0A087ZUH2	Uncharacterized protein OS=Apis mellifera OX=7460 GN=LOC412806 PE=4 SV=1	0	FALSE		5.96	15	2	3	2	140	15	9.91	0		0										1.66					1		1										1
FALSE	High	Master Protein	A0A087ZPB7	Uncharacterized protein OS=Apis mellifera OX=7460 GN=LOC412864 PE=4 SV=1	0	FALSE		23.615	19	3	38	3	200	22.5	9.85	6.47		17.55	12.17	13.95	12.38	2.41		8.5			8.43	6.33	2.18	10.98	2.28		1		3	2	1	2	1		2			2	2	1	1	1
FALSE	High	Master Protein	A0A088AP41	Uncharacterized protein OS=Apis mellifera OX=7460 GN=LOC412885 PE=4 SV=1	0.001	FALSE		3.936	4	1	1	1	310	34.2	6.02	2.1																	1
FALSE	High	Master Protein	A0A088AEJ8	Uncharacterized protein OS=Apis mellifera OX=7460 GN=LOC412935 PE=4 SV=1	0.009	FALSE		2.59	2	1	1	1	467	53.7	5.8													0																	1
FALSE	High	Master Protein	A0A088A9K8	Uncharacterized protein OS=Apis mellifera OX=7460 GN=LOC413048 PE=3 SV=1	0	FALSE		6.79	4	2	2	2	628	71.5	7.62					2.21																	2
FALSE	High	Master Protein	A0A087ZYF6	Uncharacterized protein OS=Apis mellifera OX=7460 GN=LOC413054 PE=4 SV=1	0	FALSE		161.202	26	24	61	24	1314	146.4	6.7			122.35			8.96	0						12.62		22.44					20			3	1						5		9
FALSE	High	Master Protein	A0A087ZW78	Uncharacterized protein OS=Apis mellifera OX=7460 GN=LOC413091 PE=4 SV=1	0	FALSE		6.059	2	2	2	2	916	104.3	5.59									0						1.87											1						1
FALSE	High	Master Protein	A0A087ZQ67	Uncharacterized protein OS=Apis mellifera OX=7460 GN=LOC413128 PE=4 SV=1	0	FALSE		44.613	22	9	17	9	623	69.2	7.01	2.1		16.45		2.51	2.35			2.25	0			2.66		7.61			1		6		1	1			1	1			1		4
FALSE	High	Master Protein	A0A088AQ58	Uncharacterized protein OS=Apis mellifera OX=7460 GN=LOC413168 PE=4 SV=1	0	FALSE		10.673	7	2	5	2	331	36.7	8.07					2.18				2.74				0		2.34							2				1				1		1
FALSE	High	Master Protein	A0A087ZP04	Uncharacterized protein OS=Apis mellifera OX=7460 GN=LOC413252 PE=4 SV=1	0	FALSE		8.951	4	2	2	2	632	71.7	7.28						3.31							0										1							1
FALSE	High	Master Protein	A0A088AMI2	Uncharacterized protein OS=Apis mellifera OX=7460 GN=LOC413305 PE=3 SV=1	0	FALSE		11.019	7	3	9	3	461	54.1	8.78			2.3		2.02				2.01				1.74		2.69					2		3				1				1		2
FALSE	High	Master Protein	A0A088A9C2	Uncharacterized protein OS=Apis mellifera OX=7460 GN=LOC413354 PE=4 SV=1	0	FALSE		72.942	40	16	76	16	449	50.5	7.62	1.73		10.13		10.9	15.98	0		21.18	0	1.61	3.42	10.19	21.4	24.28	2.01		4		5		7	3	4		5	1	4	2	7	6	8	6
FALSE	High	Master Protein	A0A088AK13	Uncharacterized protein OS=Apis mellifera OX=7460 GN=LOC413394 PE=3 SV=1	0	FALSE		46.001	35	6	31	6	213	24.7	9.07	3.14		7.49	0	6.97	5.01			10.44			0	1.71	2.01	29.59	2.03		2		4	1	3	3			3			1	1	1	6	1
FALSE	High	Master Protein	A0A088AQM9	Uncharacterized protein OS=Apis mellifera OX=7460 GN=LOC413551 PE=3 SV=1	0	FALSE		9.572	13	2	4	2	338	37.5	9.99			3.93			0			1.87											1			1			1
FALSE	High	Master Protein	A0A0B4J2P7	Uncharacterized protein OS=Apis mellifera OX=7460 GN=LOC413567 PE=4 SV=1	0	FALSE		39.038	43	9	39	9	244	26.5	8.51	16.4		2.67			7.01	3.57	2.34		2.06	0	4.21	6.99	5.29	2.63	11.86	1.79	6		1			3	2	2		2	2	2	4	3	1	4	2
FALSE	High	Master Protein	A0A088AVC9	Uncharacterized protein OS=Apis mellifera OX=7460 GN=LOC413613 PE=4 SV=1	0	FALSE		38.21	37	6	33	6	229	26.6	7.49	0		3.14	0	6.32	3.26			7.5	0		3.4	1.74	4.73	21.54	2.66	0	1		1	1	2	1			3	1		1	1	3	4	3	1
FALSE	High	Master Protein	A0A088AEP8	Uncharacterized protein OS=Apis mellifera OX=7460 GN=LOC413697 PE=4 SV=1	0	FALSE		44.18	28	10	11	10	627	68.6	7.74	13.92							0										9							1
FALSE	High	Master Protein	A0A087ZST6	Uncharacterized protein OS=Apis mellifera OX=7460 GN=LOC413724 PE=4 SV=1	0	FALSE		7.359	3	1	1	1	426	47.8	8.66															3.37																	1
FALSE	High	Master Protein	A0A088A0G9	Uncharacterized protein OS=Apis mellifera OX=7460 GN=LOC413762 PE=4 SV=1	0	FALSE		73.73	39	9	86	9	267	29.9	4.98	25.18		4.16	3.46	2.19	16.92		0	19.32		2.2	11.16	2.87	54.24	8.93	17.73	0	6		2	3	1	6		2	5		5	6	1	8	3	7	1
FALSE	High	Master Protein	A0A088A3B9	Uncharacterized protein OS=Apis mellifera OX=7460 GN=LOC413796 PE=3 SV=1	0	FALSE		4.929	3	1	2	1	960	109.5	8.13			0						0											1						1
FALSE	High	Master Protein	A0A088ALN8	Uncharacterized protein OS=Apis mellifera OX=7460 GN=LOC413845 PE=3 SV=1	0	FALSE		20.7	17	2	25	2	145	16.3	8.28	5.49		10.35	4.46	13.78	6.95	0		14.18			2.91	5.86			2.19		1		1	1	1	1	1		2			1	2			1
FALSE	High	Master Protein	A0A087ZX60	Uncharacterized protein OS=Apis mellifera OX=7460 GN=LOC413869 PE=4 SV=1	0	FALSE		6.456	11	2	2	2	326	36.7	9.23									2.55				1.89													1				1
FALSE	High	Master Protein	A0A088APV9	Uncharacterized protein OS=Apis mellifera OX=7460 GN=LOC413997 PE=4 SV=1	0	FALSE		11.754	27	3	8	3	171	19.5	9.26			2.03						2.09						2.22					2						3						1
FALSE	High	Master Protein	A0A088AD67	Uncharacterized protein OS=Apis mellifera OX=7460 GN=LOC414035 PE=4 SV=1	0	FALSE		75.487	38	10	109	10	363	40.8	7.66	19.9		39.73	6.22	25.93	24.73		4.32	4.62	5.88		18.4	26.83	5.27	13.67	14.74	4.62	6		7	4	7	6		5	2	6		6	5	2	3	7	6
FALSE	High	Master Protein	A0A088ARI3	Uncharacterized protein OS=Apis mellifera OX=7460 GN=LOC550885 PE=4 SV=1	0	FALSE		4.054	2	1	2	1	611	68.9	8.09	0								2.15									1								1
FALSE	High	Master Protein	A0A088AVL8	Uncharacterized protein OS=Apis mellifera OX=7460 GN=LOC551042 PE=3 SV=1	0	FALSE		34.874	60	6	61	6	122	14.4	9.67	1.78		7.22	8.19	10.54	16.72	6.54		19.03	2.3		7.17		5.41	9.79	2.9		1		3	4	4	5	4		4	2		3		3	2	1
FALSE	High	Master Protein	A0A088A215	Uncharacterized protein OS=Apis mellifera OX=7460 GN=LOC551061 PE=4 SV=1	0	FALSE		25.376	7	6	11	6	1392	156.8	8.57			6.88		0				3.82				0		6.66					4		2				2				1		2
FALSE	High	Master Protein	A0A088ANZ0	Uncharacterized protein OS=Apis mellifera OX=7460 GN=LOC551093 PE=3 SV=1	0	FALSE		233.688	68	29	373	29	616	68.3	5.43	28.96		95.01	59	98.33	96.62	5.93	19.72	85.54	8.84	7.66	29.73	26.05	87.52	111.74	44.55	9.84	14		20	20	22	23	3	9	18	11	8	11	10	19	18	15	15
FALSE	High	Master Protein	A0A088ACK4	Uncharacterized protein OS=Apis mellifera OX=7460 GN=LOC551125 PE=3 SV=1	0	FALSE		50.33	59	8	85	8	130	14.8	10.05	3.82		19.48	0	26.09	9.83	0		24.44	1.63		10.45	13.31	8.92	30.19	10.37	0	5		6	2	5	5	1		7	3		5	5	2	8	4	2
FALSE	High	Master Protein	A0A087ZVW2	Uncharacterized protein OS=Apis mellifera OX=7460 GN=LOC551126 PE=4 SV=1	0	FALSE		8.094	17	2	5	2	161	18.6	9.96				0		3.42	0		3.79				0								1		1	1		1				1
FALSE	High	Master Protein	A0A088ATY1	Uncharacterized protein OS=Apis mellifera OX=7460 GN=LOC551144 PE=4 SV=1	0	FALSE		19.041	14	4	9	4	288	32.7	7.05			13.25			2.75							4.21							4			1							2
FALSE	High	Master Protein	A0A088AUI4	Uncharacterized protein OS=Apis mellifera OX=7460 GN=LOC551167 PE=4 SV=1	0	FALSE		185.986	25	27	128	27	1343	147.3	7.64	15.98		17.7		50.87	30.53	4.33		69.96			13.53	36.85	14.76	101.91	0		5		5		15	11	4		19			6	11	4	18	1
FALSE	High	Master Protein	A0A088AM39	Uncharacterized protein OS=Apis mellifera OX=7460 GN=LOC551189 PE=3 SV=1	0	FALSE		29.98	25	7	17	7	359	41.8	6.79	3.75		2.27			2.03			6.46		0	1.67			3.95	2.57		2		2			2			3		1	1			2	2
FALSE	High	Master Protein	A0A088A224	Uncharacterized protein OS=Apis mellifera OX=7460 GN=LOC551211 PE=4 SV=1	0	FALSE		123.576	51	19	121	18	425	49	6.33	11.93		10.74	2.1	17.79	15.44			39.75	2.47	0	5.17	35.54	46.76	35.56	8.57	0	7		6	3	6	8			14	3	1	4	12	11	7	6	2
FALSE	High	Master Protein	A0A087ZRI0	Uncharacterized protein OS=Apis mellifera OX=7460 GN=LOC551227 PE=4 SV=1	0.006	FALSE		3.377	3	1	1	1	478	54.8	5.44									0																	1
FALSE	High	Master Protein	A0A088AC08	Uncharacterized protein OS=Apis mellifera OX=7460 GN=LOC551241 PE=3 SV=1	0	FALSE		9.869	11	3	3	3	308	34.9	9.99									4.2																	3
FALSE	High	Master Protein	A0A088AIF9	Uncharacterized protein OS=Apis mellifera OX=7460 GN=LOC551252 PE=4 SV=1	0	FALSE		16.636	23	5	8	5	351	39.7	4.7											0		2.17	4.34		0												2		1	3		2
FALSE	High	Master Protein	A0A088ACE3	Uncharacterized protein OS=Apis mellifera OX=7460 GN=LOC551291 PE=4 SV=1	0	FALSE		1617.18	74	172	1974	172	2433	280	5.26	132.32		724.59	272.71	545.37	535.98	7.9		810.72	82.34		123.2	440.73	345.07	1045.33	164.99		50		112	86	103	107	11		122	54		53	102	75	123	70
FALSE	High	Master Protein	A0A088AC05	Uncharacterized protein OS=Apis mellifera OX=7460 GN=LOC551318 PE=4 SV=1	0	FALSE		11.187	43	4	16	4	109	12.9	9.55	0		1.82	0	1.87		1.72		3.77	0		1.7	2.1		0	0		1		1	1	1		2		3	1		2	1		1	1
FALSE	High	Master Protein	A0A088A892	Uncharacterized protein OS=Apis mellifera OX=7460 GN=LOC551436 PE=3 SV=1	0	FALSE		107.98	56	21	70	21	544	59.1	5.91	6.79		5.9	0	11.5	0			36.58		1.98	2.48	11.12	7.09	33.23	3.51		6		2	2	5	3			12		3	2	6	4	10	6
FALSE	High	Master Protein	A0A088ADG4	Uncharacterized protein OS=Apis mellifera OX=7460 GN=LOC551438 PE=3 SV=1	0	FALSE		41.242	27	6	20	6	376	42.6	6.81			3.31		8.49	5.56			8.83			0	1.74	8.31	17.66	2.42				1		3	2			4			1	1	3	3	1
FALSE	High	Master Protein	A0A088ABT5	Uncharacterized protein OS=Apis mellifera OX=7460 GN=LOC551459 PE=4 SV=1	0	FALSE		6.797	6	2	3	2	326	37.1	8.65			0		0								1.71							1		1								1
FALSE	High	Master Protein	A0A087ZNQ7	Uncharacterized protein OS=Apis mellifera OX=7460 GN=LOC551462 PE=4 SV=1	0	FALSE		4.796	1	1	1	1	1210	138.6	7.3													0																	1
FALSE	High	Master Protein	A0A088AAK6	Uncharacterized protein OS=Apis mellifera OX=7460 GN=LOC551499 PE=4 SV=1	0	FALSE		6.53	5	2	5	2	392	44.2	9.82			2.3		1.94				3.8						2.04					1		1				2						1
FALSE	High	Master Protein	A0A088ARH0	Uncharacterized protein OS=Apis mellifera OX=7460 GN=LOC551516 PE=4 SV=1	0	FALSE		6.831	10	2	3	2	221	24.9	8.56			0			0									2.46					1			1									1
FALSE	High	Master Protein	A0A088A4S2	Uncharacterized protein OS=Apis mellifera OX=7460 GN=LOC551524 PE=4 SV=1	0	FALSE		55.433	31	8	28	8	408	46.6	6.87								20.41			33.42						2.94								5			7						2
FALSE	High	Master Protein	A0A088AN29	Uncharacterized protein OS=Apis mellifera OX=7460 GN=LOC551541 PE=4 SV=1	0	FALSE		56.823	41	5	155	5	118	13.7	10.24	28.03		34.47	28.41	58.91	44.44	21.76	0	53.23	7.59		41.18	68.73	8.91	22.69	9.14	1.68	5		3	5	5	5	5	1	5	3		5	4	3	4	4	1
FALSE	High	Master Protein	A0A087ZQI4	Uncharacterized protein OS=Apis mellifera OX=7460 GN=LOC551546 PE=4 SV=1	0	FALSE		27.303	45	6	15	6	185	21.2	5.14	1.81					5.25			7.22		5.42			5.85	6.12	6.12		1					2			3		4			2	1	1
FALSE	High	Master Protein	A0A088AG47	Uncharacterized protein OS=Apis mellifera OX=7460 GN=LOC551656 PE=4 SV=1	0	FALSE		43.326	72	5	27	5	191	21.4	9.95	101.6																	5
FALSE	High	Master Protein	A0A088AVE9	Uncharacterized protein OS=Apis mellifera OX=7460 GN=LOC551660 PE=4 SV=1	0	FALSE		36.535	39	7	71	7	187	21.7	6.77	4.02		1.71	11.48	12.88	21.42	6.65		19.15	0		13.61	0	11.79	37.21			2		2	3	4	3	3		4	1		4	2	4	4
FALSE	High	Master Protein	A0A088ABI0	Uncharacterized protein OS=Apis mellifera OX=7460 GN=LOC551682 PE=4 SV=1	0.001	FALSE		3.899	3	1	1	1	425	48.5	7.01															2.52																	1
FALSE	High	Master Protein	A0A088AVC8	Uncharacterized protein OS=Apis mellifera OX=7460 GN=LOC551742 PE=4 SV=1	0	FALSE		64.837	70	8	56	8	190	21.6	5.31	2.32		7.35	7.88	10.04	13.68	0		13.31			2.21	3.4	15.86	28.26	2.82		1		2	3	6	4	3		5			3	2	3	5	2
FALSE	High	Master Protein	A0A088A6Z7	Uncharacterized protein OS=Apis mellifera OX=7460 GN=LOC551755 PE=4 SV=1	0	FALSE		23.769	34	4	35	4	156	17.7	9.73	0		6.26		9.72	5.85			11.33	1.68		8.03			8.1			1		3		3	3			4	2		3			1
FALSE	High	Master Protein	A0A088AVC4	Uncharacterized protein OS=Apis mellifera OX=7460 GN=LOC551768 PE=4 SV=1	0	FALSE		31.885	32	5	41	5	230	26.7	8.65	2.33		0	0	11.06	8.19			20.16	2.15		10.29	8.43	2.92	28.24	0		2		1	1	3	3			3	2		3	3	1	5	1
FALSE	High	Master Protein	A0A088ANE5	Uncharacterized protein OS=Apis mellifera OX=7460 GN=LOC551775 PE=3 SV=1	0	FALSE		141.7	65	22	193	22	466	50.9	9.54	28.86		70.16	12.97	36.1	27.33			71.02	1.87	0	34.89	32.65	34.16	64.1	10.01	1.66	9		13	7	13	11			15	5	2	12	13	7	13	6	2
FALSE	High	Master Protein	A0A087ZYA4	Uncharacterized protein OS=Apis mellifera OX=7460 GN=LOC551806 PE=3 SV=1	0	FALSE		15.211	17	2	2	2	269	28.5	6.86															5.09		0															1		1
FALSE	High	Master Protein	A0A088A7R3	Uncharacterized protein OS=Apis mellifera OX=7460 GN=LOC551843 PE=4 SV=1	0	FALSE		38.111	15	8	16	8	773	88.8	8.4			7.03		5.18				11.76					0	5.88					3		2				7					1	3
FALSE	High	Master Protein	A0A088AD49	Uncharacterized protein OS=Apis mellifera OX=7460 GN=LOC551857 PE=4 SV=1	0	FALSE		6.369	10	2	4	2	263	29.5	6.8	2.46							1.89										2							1
FALSE	High	Master Protein	A0A088AD88	Uncharacterized protein OS=Apis mellifera OX=7460 GN=LOC551859 PE=3 SV=1	0	FALSE		17.028	30	4	16	4	149	16.8	4.22	2.69			8.48	4.06	3.37		2.15	0	0				2.11		2.81	0	1			3	1	1		1	1	1				1		1	1
FALSE	High	Master Protein	A0A088AJA7	Uncharacterized protein OS=Apis mellifera OX=7460 GN=LOC551912 PE=4 SV=1	0	FALSE		4.416	22	1	1	1	93	10.7	4.83																0																	1
FALSE	High	Master Protein	A0A087ZZN9	Uncharacterized protein OS=Apis mellifera OX=7460 GN=LOC551929 PE=4 SV=1	0	FALSE		22.593	25	7	15	6	360	39.2	8.73	14.33																	7
FALSE	High	Master Protein	A0A088AHT8	Uncharacterized protein OS=Apis mellifera OX=7460 GN=LOC551986 PE=4 SV=1	0	FALSE		28.854	26	5	6	5	293	32.8	6.43	14.12																	5
FALSE	High	Master Protein	A0A087ZZE0	Uncharacterized protein OS=Apis mellifera OX=7460 GN=LOC552000 PE=4 SV=1	0	FALSE		11.346	10	2	5	2	280	31.8	9.11	2.09													2.49	7.42			1													1	1
FALSE	High	Master Protein	A0A088ARX8	Uncharacterized protein OS=Apis mellifera OX=7460 GN=LOC552006 PE=4 SV=1	0.001	FALSE		3.955	3	1	1	1	395	44.8	12.1													2.49																	1
FALSE	High	Master Protein	A0A088ASQ4	Uncharacterized protein OS=Apis mellifera OX=7460 GN=LOC552016 PE=3 SV=1	0	FALSE		45.367	42	11	56	11	292	32.2	9.63	3.76		26.46	0	12.33	11.58			23.81	1.68		5.92	3.99	0	7.84	1.91		2		7	4	5	5			8	2		3	3	1	2	4
FALSE	High	Master Protein	A0A087ZRH4	Uncharacterized protein OS=Apis mellifera OX=7460 GN=LOC552027 PE=4 SV=1	0	FALSE		37.579	23	7	38	7	378	39.1	9.39	5.76		0		7.83	10.33			4.22	0			7.77	6.28	4.91	0		2		1		3	4			4	1			4	4	2	3
FALSE	High	Master Protein	A0A087ZPN0	Uncharacterized protein OS=Apis mellifera OX=7460 GN=LOC552121 PE=4 SV=1	0.008	FALSE		3.106	4	1	1	1	288	31.7	5.72																0																	1
FALSE	High	Master Protein	A0A0B4J2P8	Uncharacterized protein OS=Apis mellifera OX=7460 GN=LOC552138 PE=4 SV=1	0.006	FALSE		3.519	11	2	3	2	195	21.9	7.99					0	0									0							1	1									1
FALSE	High	Master Protein	A0A087ZR36	Uncharacterized protein OS=Apis mellifera OX=7460 GN=LOC552149 PE=3 SV=1	0	FALSE		4.57	6	1	1	1	251	26.4	6.96										0																	1
FALSE	High	Master Protein	A0A088AK95	Uncharacterized protein OS=Apis mellifera OX=7460 GN=LOC552190 PE=4 SV=1	0	FALSE		28.953	32	4	21	4	242	25.1	8.32	11.85	1.92	11.73		4.98		6.52			3.83			4		3.97		0	2	1	2		1		3			2			2		1		2
FALSE	High	Master Protein	A0A087ZPS2	Uncharacterized protein OS=Apis mellifera OX=7460 GN=LOC552206 PE=3 SV=1	0	FALSE		25.62	17	5	24	5	444	50.6	7.74	0		4.78			2.69			6.34			0		4.55	11.08	0		1		3			1			3			2		3	3	1
FALSE	High	Master Protein	A0A088AUJ8	Uncharacterized protein OS=Apis mellifera OX=7460 GN=LOC552211 PE=4 SV=1	0	FALSE		36.806	34	5	27	5	199	23.2	9.09	2.66		12.15		7.01				13.56				2.93	2.33	23.34	0	0	1		4		3				3				1	1	4	1	1
FALSE	High	Master Protein	A0A087ZV89	Uncharacterized protein OS=Apis mellifera OX=7460 GN=LOC552217 PE=4 SV=1	0	FALSE		14.113	11	4	4	4	403	44.5	9.03	6.57																	4
FALSE	High	Master Protein	A0A088A2A5	Uncharacterized protein OS=Apis mellifera OX=7460 GN=LOC552272 PE=3 SV=1	0	FALSE		45.875	43	6	43	6	143	16	10.56	6.14		6.55	0	12.35	6.88			11.87			3.45	5.2	2.5	24.66	5.26	0	3		2	1	4	3			5			3	3	2	4	2	1
FALSE	High	Master Protein	U3KR34	Uncharacterized protein OS=Apis mellifera OX=7460 GN=LOC552295 PE=4 SV=1	0	FALSE		7.965	8	2	6	2	182	20.7	9.47						2.87				0		2.52		2.35	7.04								1				1		1		1	1
FALSE	High	Master Protein	A0A088A196	Uncharacterized protein OS=Apis mellifera OX=7460 GN=LOC552303 PE=4 SV=1	0	FALSE		5.167	4	1	1	1	415	42.8	9.63													2.38																	1
FALSE	High	Master Protein	A0A088AV58	Uncharacterized protein OS=Apis mellifera OX=7460 GN=LOC552320 PE=4 SV=1	0	FALSE		28.881	27	5	16	5	291	31.4	8.03	17.02		16.67			4.29							5.61					5		2			2							2
FALSE	High	Master Protein	A0A087ZXL8	Uncharacterized protein OS=Apis mellifera OX=7460 GN=LOC552361 PE=3 SV=1	0	FALSE		12.242	12	4	19	4	290	31.7	9.03			1.74		1.68	1.61			5.15	0		0	0		3.91					2		4	2			3	1		1	1		3
FALSE	High	Master Protein	A0A088A2F7	Uncharacterized protein OS=Apis mellifera OX=7460 GN=LOC552419 PE=4 SV=1	0	FALSE		6.11	6	1	1	1	193	22.1	8.05															3.25																	1
FALSE	High	Master Protein	A0A087ZXL3	Uncharacterized protein OS=Apis mellifera OX=7460 GN=LOC552424 PE=4 SV=1	0	FALSE		77.825	69	12	134	12	160	19.5	7.33	17.4		28.41	26.54	32.3	36.25	17.03		44.5	1.76		24.85	26.19	9.75	21.12	2.66		5		6	7	7	8	8		8	2		7	7	3	5	1
FALSE	High	Master Protein	A0A087ZTD8	Uncharacterized protein OS=Apis mellifera OX=7460 GN=LOC552441 PE=4 SV=1	0.004	FALSE		3.707	6	1	2	1	158	17.9	9.2				1.69					2.25												1					1
FALSE	High	Master Protein	A0A087ZWG6	Uncharacterized protein OS=Apis mellifera OX=7460 GN=LOC552446 PE=4 SV=1	0	FALSE		104.397	20	13	33	13	1075	110.7	7.36							73.26																	13
FALSE	High	Master Protein	A0A088AIA6	Uncharacterized protein OS=Apis mellifera OX=7460 GN=LOC552448 PE=3 SV=1	0	FALSE		30.24	28	5	12	5	186	21.3	7.3			4.55	1.88					6.06	0			4.02	3.37	7.23					1	1					2	1			2	2	1
FALSE	High	Master Protein	A0A088ADH2	Uncharacterized protein OS=Apis mellifera OX=7460 GN=LOC552452 PE=4 SV=1	0	FALSE		11.838	10	3	3	3	383	42.5	7.56															6.45																	3
FALSE	High	Master Protein	A0A087ZW77	Uncharacterized protein OS=Apis mellifera OX=7460 GN=LOC552459 PE=4 SV=1	0	FALSE		93.127	18	6	159	6	663	52.7	9.01	89.92	36.36	31.66	41.54	16.87	26.02	13.92	12.77		34.81	0	0	37.29	0	35.07	4.11	5.09	5	5	4	6	2	4	4	4		5	1	3	5	1	3	3	3
FALSE	High	Master Protein	A0A087ZY59	Uncharacterized protein OS=Apis mellifera OX=7460 GN=LOC552495 PE=4 SV=1	0	FALSE		10.73	6	3	5	3	664	76.9	9.47					0				4.93						0							1				2						1
FALSE	High	Master Protein	A0A087ZQU9	Uncharacterized protein OS=Apis mellifera OX=7460 GN=LOC552528 PE=3 SV=1	0	FALSE		20.174	12	6	9	6	602	70.2	4.91				1.67		0			0				0		4.28						2		1			1				1		3
FALSE	High	Master Protein	A0A088ARQ3	Uncharacterized protein OS=Apis mellifera OX=7460 GN=LOC552531 PE=3 SV=1	0	FALSE		52.923	65	7	87	7	104	11.4	8.44	13.11		5.77	9.43	9.23	21.5		10.16	4.67	7.66	9.46	15.27	7.72	12.36		10.66	2.59	5		5	4	4	6		5	4	3	4	4	3	3		3	3
FALSE	High	Master Protein	A0A088AA90	Uncharacterized protein OS=Apis mellifera OX=7460 GN=LOC552534 PE=4 SV=1	0	FALSE		47.075	44	5	71	5	153	16.1	9.85	11.58		25.08	17.41	34.88	21.16	8.08		26.56	6.51		14.94	19.56		2.29	0		3		4	2	5	4	2		5	1		4	3		1	1
FALSE	High	Master Protein	A0A088AV16	Uncharacterized protein OS=Apis mellifera OX=7460 GN=LOC552562 PE=4 SV=1	0	FALSE		35.975	31	7	29	7	316	37.2	9.47			12.35	0	0	1.9			14.78	0		0	2.05		4.91	1.67				5	1	1	1			5	2		1	1		2	2
FALSE	High	Master Protein	A0A088A1N5	Uncharacterized protein OS=Apis mellifera OX=7460 GN=LOC552577 PE=4 SV=1	0	FALSE		4.81	3	2	3	2	948	103.2	9.79									1.66						2.23											1						1
FALSE	High	Master Protein	A0A087ZNF8	Uncharacterized protein OS=Apis mellifera OX=7460 GN=LOC552600 PE=4 SV=1	0.006	FALSE		3.392	7	1	1	1	229	25.5	5.38								2.05																	1
FALSE	High	Master Protein	A0A088ARP9	Uncharacterized protein OS=Apis mellifera OX=7460 GN=LOC552637 PE=3 SV=1	0	FALSE		385.166	65	25	3089	1	376	41.8	5.48	305.04	24.72	468.11	146.16	654.89	357.93	231.28	71.07	507.85	97.4	79.74	338.86	1129.72	983.14	1538.25	456.51	82.67	14	7	16	14	16	13	13	10	14	10	13	16	18	14	18	17	14
FALSE	High	Master Protein	A0A087ZUQ1	Uncharacterized protein OS=Apis mellifera OX=7460 GN=LOC552638 PE=4 SV=1	0	FALSE		18.264	35	5	7	5	173	19.9	4.91	3.85				2.41					0			1.68	0				1				1					1			2	1
FALSE	High	Master Protein	A0A088A0F7	Uncharacterized protein OS=Apis mellifera OX=7460 GN=LOC552659 PE=4 SV=1	0.006	FALSE		3.391	8	1	2	1	212	24.4	9.45					0				2.02													1				1
FALSE	High	Master Protein	A0A087ZSC9	Uncharacterized protein OS=Apis mellifera OX=7460 GN=LOC552671 PE=4 SV=1	0	FALSE		233.106	67	26	450	26	442	47.6	7.81	57.16		101.07	81.64	157.65	106.65	57.47		111.69	17.2		87.25	73.03	112.2	122.04	17.03	0	11		14	18	18	18	16		15	9		16	16	17	17	9	2
FALSE	High	Master Protein	A0A088AM27	Uncharacterized protein OS=Apis mellifera OX=7460 GN=LOC552722 PE=4 SV=1	0	FALSE		36.066	36	7	23	7	281	32.1	5.73	2.09			7.03				2.89		2.06	2.93	2.91		3.1		7.2	0	2			5				3		2	2	2		1		5	1
FALSE	High	Master Protein	A0A088ARP1	Uncharacterized protein OS=Apis mellifera OX=7460 GN=LOC552756 PE=3 SV=1	0	FALSE		13.286	22	4	5	4	345	38.7	7.27	2.78		2.04					0			0					0		1		1					1			1					1
FALSE	High	Master Protein	A0A088A958	Uncharacterized protein OS=Apis mellifera OX=7460 GN=LOC552758 PE=3 SV=1	0	FALSE		15.814	14	4	12	3	328	36.8	7.96			7.98	0	8.04	2.96						2.36	1.83		4.25					3	1	2	1						1	1		1
FALSE	High	Master Protein	A0A087ZVB7	Uncharacterized protein OS=Apis mellifera OX=7460 GN=LOC552773 PE=4 SV=1	0	FALSE		14.669	20	4	6	4	248	28	8.24	10.88																	4
FALSE	High	Master Protein	A0A088A330	Uncharacterized protein OS=Apis mellifera OX=7460 GN=LOC552786 PE=4 SV=1	0	FALSE		16.539	19	3	10	3	227	25.8	5.62	2.99		0		3.24			0			0	2.6	4.15		5.24	1.68		1		1		1			1			1	1	2		1	1
FALSE	High	Master Protein	A0A087ZX77	Uncharacterized protein OS=Apis mellifera OX=7460 GN=LOC552790 PE=4 SV=1	0	FALSE		4.123	8	2	2	2	372	42.4	8.76									0						0											1						1
FALSE	High	Master Protein	A0A087ZZ11	Uncharacterized protein OS=Apis mellifera OX=7460 GN=LOC552809 PE=4 SV=1	0	FALSE		39.402	56	5	120	5	85	9.7	9.58	17.39		17.66	15.5	36.82	17.03	13.24		30.71	7.53		15.57	19.62	11.61	36.8	10.28	1.67	3		4	3	4	3	4		4	2		4	3	2	5	2	1
FALSE	High	Master Protein	A0A088A0Z6	Uncharacterized protein OS=Apis mellifera OX=7460 GN=LOC552843 PE=4 SV=1	0.01	FALSE		2.531	1	1	1	1	824	93.7	6.27								2.15																	1
FALSE	High	Master Protein	A0A088A939	Uncharacterized protein OS=Apis mellifera OX=7460 GN=LOC724264 PE=4 SV=1	0	FALSE		39.93	50	5	28	5	98	11.2	9.99	2.33		5.05	2.69	7.26	4.86	4.33		6.08			4.36	0	4.7	10.92			1		2	2	2	2	1		2			2	1	1	2
FALSE	High	Master Protein	A0A087ZQ23	Uncharacterized protein OS=Apis mellifera OX=7460 GN=LOC724280 PE=4 SV=1	0	FALSE		5.475	15	2	2	2	149	18.2	7.17									0						2.34											1						1
FALSE	High	Master Protein	A0A088AU33	Uncharacterized protein OS=Apis mellifera OX=7460 GN=LOC724286 PE=4 SV=1	0	FALSE		4.292	7	1	6	1	167	19.2	9.25									5.06			0	2.59		2.73	0										1			1	1		1	1
FALSE	High	Master Protein	A0A088AUP4	Uncharacterized protein OS=Apis mellifera OX=7460 GN=LOC724341 PE=4 SV=1	0	FALSE		48.565	49	11	42	11	243	27.5	7.33	4.12		2.36	2.09		2.26		0	4.18	0	9.06	7.57			4.96	14.02	11.38	1		2	1		2		1	2	1	9	3			2	6	7
FALSE	High	Master Protein	A0A088AR21	Uncharacterized protein OS=Apis mellifera OX=7460 GN=LOC724365 PE=4 SV=1	0	FALSE		6.339	25	1	2	1	114	12.7	6.3					3.2					0												1					1
FALSE	High	Master Protein	A0A088ADM7	Uncharacterized protein OS=Apis mellifera OX=7460 GN=LOC724531 PE=3 SV=1	0	FALSE		9.482	32	2	19	2	65	7.4	10.37	3.07		1.82	2.06		6.13		0	5	2.2		2.22	4.57	5.54		4.21	2.17	1		1	1		1		1	1	1		1	1	1		2	1
FALSE	High	Master Protein	A0A088A7D2	Uncharacterized protein OS=Apis mellifera OX=7460 GN=LOC724580 PE=4 SV=1	0	FALSE		17.699	17	1	12	1	128	13.9	7.42														6.08	17.16	6.18	6.67														1	1	1	1
FALSE	High	Master Protein	A0A087ZVS0	Uncharacterized protein OS=Apis mellifera OX=7460 GN=LOC724676 PE=3 SV=1	0	FALSE		9.999	16	2	3	2	180	20.2	7.14				0					1.69			2.11									1					1			1
FALSE	High	Master Protein	A0A088A5C5	Uncharacterized protein OS=Apis mellifera OX=7460 GN=LOC724680 PE=4 SV=1	0	FALSE		16.716	28	3	29	3	128	15.3	5.74	0		19.25	0	7.47	2.98			6.13	0		2.12	8.05		2.25	4.55	0	1		3	1	3	1			1	2		1	2		1	2	1
FALSE	High	Master Protein	A0A087ZPU1	Uncharacterized protein OS=Apis mellifera OX=7460 GN=LOC724721 PE=3 SV=1	0	FALSE		155.117	83	16	365	16	252	28.1	8.37	51	15.22	10.44	14.38	63.42	133.74	4.23	7.5	44.49	11.68	32.77	102.24	162.99	21.06	90	35.52	8.35	8	5	3	3	9	14	3	4	9	6	6	13	13	6	11	10	4
FALSE	High	Master Protein	A0A087ZUH7	Uncharacterized protein OS=Apis mellifera OX=7460 GN=LOC724749 PE=4 SV=1	0	FALSE		218.454	37	29	177	29	1311	143.2	8.98	32.21		5.14		4.14	53.87			10.13	106.1		29.84	17.12	47.16	84.3	7.34		9		1		2	14			4	24		12	6	11	17	7
FALSE	High	Master Protein	A0A088AQB0	Uncharacterized protein OS=Apis mellifera OX=7460 GN=LOC724779 PE=4 SV=1	0	FALSE		158.357	33	17	268	17	671	75.7	6.55	136.78	12.94		49.1	46.42	36.69	33.67	92.04		37.13	19.54	24.03	4.55			18.73	35.71	14	6		10	9	8	10	16		11	9	8	2			6	7
FALSE	High	Master Protein	A0A088ARL3	Uncharacterized protein OS=Apis mellifera OX=7460 GN=LOC724827 PE=4 SV=1	0	FALSE		43.004	60	6	91	6	121	14.6	7.3	10.36		18.09	19.63	27.54	21.3	5.26		27.23	0		13.71	2.23	8.24	8.5	0		5		5	6	6	5	5		6	1		5	1	3	3	1
FALSE	High	Master Protein	A0A087ZMW2	Uncharacterized protein OS=Apis mellifera OX=7460 GN=LOC724829 PE=4 SV=1	0.01	FALSE		2.571	10	1	8	1	82	9.1	9.11			1.68		0	0			1.97			0			3.95					1		1	1			1			1			1
FALSE	High	Master Protein	A0A088AG74	Uncharacterized protein OS=Apis mellifera OX=7460 GN=LOC725011 PE=3 SV=1	0.008	FALSE		2.697	4	1	1	1	347	40.2	9.52					0																	1
FALSE	High	Master Protein	A0A087ZVA0	Uncharacterized protein OS=Apis mellifera OX=7460 GN=LOC725076 PE=4 SV=1	0	FALSE		11.816	13	2	7	2	155	17	8.22														0	2.43																2	2
FALSE	High	Master Protein	A0A088A5L1	Uncharacterized protein OS=Apis mellifera OX=7460 GN=LOC725089 PE=4 SV=1	0	FALSE		99.431	59	13	61	12	249	24.5	9.26	161.71																	13
FALSE	High	Master Protein	A0A088A633	Uncharacterized protein OS=Apis mellifera OX=7460 GN=LOC725146 PE=4 SV=1	0	FALSE		43.491	37	11	73	11	300	34.5	9.69	0		24.23	0	9.63	10.87			31.74			4.7	5.92	6.66	22.89	7.68	0	1		8	1	4	5			5			3	4	3	5	6	3
FALSE	High	Master Protein	A0A087ZZ67	Uncharacterized protein OS=Apis mellifera OX=7460 GN=LOC725169 PE=4 SV=1	0	FALSE		190.803	38	32	125	32	1224	140	6.49	13.3		45.5	0	23.65	34.27			6.8	0		4.59	36.34	6.93	82.6	5.18	0	7		12	1	9	11			4	3		3	15	4	21	7	4
FALSE	High	Master Protein	A0A087ZT72	Uncharacterized protein OS=Apis mellifera OX=7460 GN=LOC725171 PE=4 SV=1	0	FALSE		11.723	17	3	7	3	229	26.5	10.02			0		0	0			3.13			0			2.68					1		1	2			1			1			1
FALSE	High	Master Protein	A0A088AJ54	Uncharacterized protein OS=Apis mellifera OX=7460 GN=LOC725239 PE=4 SV=1	0	FALSE		70.179	14	9	26	9	1037	117.1	8.31			32.21		3.6	2.12				2.23		2.76	0		12.08					8		1	2				1		1	1		4
FALSE	High	Master Protein	A0A087ZU39	Uncharacterized protein OS=Apis mellifera OX=7460 GN=LOC725258 PE=3 SV=1	0	FALSE		94.654	71	16	182	16	326	35.7	9.29	2.7		41.96	16.01	35.51	10.25			58.93			15.45	28.91	16.34	102.91	19.38	4.02	3		9	6	12	3			12			6	8	4	8	5	3
FALSE	High	Master Protein	A0A088ASH3	Uncharacterized protein OS=Apis mellifera OX=7460 GN=LOC725260 PE=4 SV=1	0	FALSE		5.598	5	1	3	1	233	27	6.99					1.78										5.17							1										1
FALSE	High	Master Protein	A0A088AU44	Uncharacterized protein OS=Apis mellifera OX=7460 GN=LOC725274 PE=3 SV=1	0	FALSE		227.662	89	18	714	18	254	27.1	9.09	163.69	3.94	131.1	103.68	140.7	121.35	23.86	36.36	161.09	28.79	109.68	172.24	136.65	90.05	276.63	182.18	26.39	16	2	16	15	15	15	5	9	16	5	14	17	10	9	14	13	11
FALSE	High	Master Protein	A0A088ACW9	Uncharacterized protein OS=Apis mellifera OX=7460 GN=LOC725283 PE=4 SV=1	0	FALSE		40.849	49	6	8	6	230	25.3	5.8	25.25																	6
FALSE	High	Master Protein	A0A088ARU2	Uncharacterized protein OS=Apis mellifera OX=7460 GN=LOC725315 PE=4 SV=1	0	FALSE		26.067	42	6	52	6	117	13.9	9.86	5.06		10.23	13.27	11.01	10.32	9.03		6.51	0		5.95	7.4	1.73	4.06	1.75		2		2	5	2	3	5		3	1		4	3	2	2	1
FALSE	High	Master Protein	A0A088AJX4	Uncharacterized protein OS=Apis mellifera OX=7460 GN=LOC725318 PE=4 SV=1	0	FALSE		29.109	20	4	18	4	246	27.9	9.2					8.85	3.12			13.6			6.8	4.75	3.8	13.95							3	1			2			2	2	1	3
FALSE	High	Master Protein	A0A088A9B3	Uncharacterized protein OS=Apis mellifera OX=7460 GN=LOC725515 PE=4 SV=1	0	FALSE		7.962	8	2	2	2	439	50.1	7.47															2.44																	2
FALSE	High	Master Protein	A0A088AN34	Uncharacterized protein OS=Apis mellifera OX=7460 GN=LOC725548 PE=4 SV=1	0	FALSE		12.262	11	3	9	3	323	35	6.04				2.14		0			0			0			5.03	0					2		1			1			1			2	1
FALSE	High	Master Protein	A0A088A0H9	Uncharacterized protein OS=Apis mellifera OX=7460 GN=LOC725550 PE=4 SV=1	0.008	FALSE		2.788	0	1	1	1	1834	213	7.58									1.92																	1
FALSE	High	Master Protein	A0A088AJC6	Uncharacterized protein OS=Apis mellifera OX=7460 GN=LOC725572 PE=4 SV=1	0	FALSE		24.222	27	3	10	3	96	10.8	7.77	1.93		2.92	1.65	4.55	2.02						1.9			10.33			1		1	1	1	1						1			3
FALSE	High	Master Protein	A0A088A9A7	Uncharacterized protein OS=Apis mellifera OX=7460 GN=LOC725594 PE=4 SV=1	0	FALSE		44.716	55	8	29	8	288	31.7	9.76					7.28		10.41		25.09			0		11.94	2.76	3.81						2		5		7			1		4	1	2
FALSE	High	Master Protein	A0A088AF83	Uncharacterized protein OS=Apis mellifera OX=7460 GN=LOC725623 PE=4 SV=1	0	FALSE		20.21	10	4	14	4	528	60.1	8.62	11.26		2.82		1.7	1.81		1.76	2.15	0	0							4		1		1	1		2	1	1	1
FALSE	High	Master Protein	A0A088AUY1	Uncharacterized protein OS=Apis mellifera OX=7460 GN=LOC725626 PE=4 SV=1	0	FALSE		27.368	25	6	20	6	296	33.5	8.85	6.26		4.27	0	4.22				2.44			0	4.04	0	8.56	1.71		2		1	1	2				2			2	1	1	2	2
FALSE	High	Master Protein	A0A088AF62	Uncharacterized protein OS=Apis mellifera OX=7460 GN=LOC725661 PE=4 SV=1	0	FALSE		23.678	16	6	24	6	390	44.9	6.99	0		6.61	4.76	10.42	5.02		0	5.41	0		4.35	2.04				0	1		2	3	3	2		1	2	1		1	1				1
FALSE	High	Master Protein	A0A088A494	Uncharacterized protein OS=Apis mellifera OX=7460 GN=LOC725680 PE=4 SV=1	0	FALSE		102.781	42	21	54	20	743	82.6	7.33				34.94		6.97			21.28		0	2.59	4.93		28.54	3.61	0				16		3			7		1	1	2		10	1	1
FALSE	High	Master Protein	A0A088A5F7	Uncharacterized protein OS=Apis mellifera OX=7460 GN=LOC725740 PE=4 SV=1	0	FALSE		17.939	12	4	10	4	373	44.3	9.74	1.62					0			0		0	4.2						2					1			1		1	3
FALSE	High	Master Protein	A0A088A086	Uncharacterized protein OS=Apis mellifera OX=7460 GN=LOC725797 PE=4 SV=1	0	FALSE		44.328	45	3	50	3	104	11.8	7.81	6.51		10.75	9.02	15.14	14.74	5.89		18.57	2.09		11.44		13.99	14.41	5.46		2		2	2	3	3	2		3	1		2		2	3	2
FALSE	High	Master Protein	A0A088ABR2	Uncharacterized protein OS=Apis mellifera OX=7460 GN=LOC725804 PE=4 SV=1	0	FALSE		8.837	9	2	2	2	293	28.9	6.54																3.95																	2
FALSE	High	Master Protein	H9JZY2	Uncharacterized protein OS=Apis mellifera OX=7460 GN=LOC725881 PE=4 SV=1	0	FALSE		36.802	52	4	61	4	122	14.3	8.97	2.18		10.81	2	15.71	9.84	4.42		19.72	2.02		9.83	2.81	10.59	10.63	0		1		1	3	3	3	2		4	1		3	2	2	3	1
FALSE	High	Master Protein	A0A088A0P7	Uncharacterized protein OS=Apis mellifera OX=7460 GN=LOC725882 PE=4 SV=1	0	FALSE		44.97	70	5	58	5	97	10.9	4.72	9.16		47.53	11.41	12.94	13.06	13.47			16.36		6	3.7		9.49			2		4	3	2	1	2			3		1	2		1
FALSE	High	Master Protein	A0A088AV86	Uncharacterized protein OS=Apis mellifera OX=7460 GN=LOC725930 PE=3 SV=1	0.006	FALSE		3.42	3	1	1	1	350	40.1	9.04															2																	1
FALSE	High	Master Protein	A0A087ZP36	Uncharacterized protein OS=Apis mellifera OX=7460 GN=LOC725967 PE=4 SV=1	0	FALSE		11.317	8	3	3	3	513	55.9	6.98														0		1.64															2		1
FALSE	High	Master Protein	A0A088AS47	Uncharacterized protein OS=Apis mellifera OX=7460 GN=LOC726027 PE=4 SV=1	0	FALSE		4.55	6	1	2	1	243	27.3	6.9															0																	1
FALSE	High	Master Protein	A0A087ZMY1	Uncharacterized protein OS=Apis mellifera OX=7460 GN=LOC726040 PE=4 SV=1	0	FALSE		143.249	53	22	92	22	586	65.6	8.47	5.54		2.85		0	5.16		0	24.28		4.21	12.19	5.32	60.51	15.85	31.01	0	2		1		1	1		5	9		7	5	3	13	7	12	4
FALSE	High	Master Protein	A0A088ACM2	Uncharacterized protein OS=Apis mellifera OX=7460 GN=LOC726043 PE=4 SV=1	0.006	FALSE		3.572	4	1	2	1	238	26.9	9.1												0			1.62														1			1
FALSE	High	Master Protein	A0A087ZQA3	Uncharacterized protein OS=Apis mellifera OX=7460 GN=LOC726088 PE=4 SV=1	0	FALSE		64.084	24	10	53	10	590	65.7	5.06	6.79		0	0	1.86	12.43			27.66		0	0	4.02	9.78	6.35	3.18		3		1	1	1	4			6		4	1	4	5	2	3
FALSE	High	Master Protein	A0A088A0F9	Uncharacterized protein OS=Apis mellifera OX=7460 GN=LOC726118 PE=4 SV=1	0	FALSE		36.25	68	8	108	8	78	9.5	9.6	15.86		14.58	0	17.58	12.67	0		16.65	1.64		7.59	3.71	1.97	19.18	0	0	6		5	4	4	6	3		4	2		4	5	1	4	1	1
FALSE	High	Master Protein	A0A088APW5	Uncharacterized protein OS=Apis mellifera OX=7460 GN=LOC726147 PE=4 SV=1	0.008	FALSE		2.961	4	1	10	1	185	20.7	4.83	0		0			0		0			0	0		0	0	0		1		1			1		1			1	1		1	1	1
FALSE	High	Master Protein	A0A088ATG4	Uncharacterized protein OS=Apis mellifera OX=7460 GN=LOC726178 PE=4 SV=1	0	FALSE		56.105	29	12	33	12	563	63.9	7.87			2.9		4.37	2.33			6.5			2.2	8.45	17	16.27	2.31				2		3	1			3			1	5	7	5	3
FALSE	High	Master Protein	A0A087ZQ97	Uncharacterized protein OS=Apis mellifera OX=7460 GN=LOC726221 PE=4 SV=1	0	FALSE		13.036	26	2	10	2	113	11.6	8.69	1.76		2.03		4.07	1.76			2.32						4.65			1		1		1	1			1						1
FALSE	High	Master Protein	A0A088AHD2	Uncharacterized protein OS=Apis mellifera OX=7460 GN=LOC726268 PE=4 SV=1	0	FALSE		44.83	24	3	86	3	152	16.6	6.7	28.3	0	7.5	26.47	47.66	36.08	7.44	0	21.34	33.67		9.01	9.75	7.91	22.01	5.22		3	2	2	3	3	3	2	1	2	2		2	2	1	1	1
FALSE	High	Master Protein	A0A088AHM6	Uncharacterized protein OS=Apis mellifera OX=7460 GN=LOC726364 PE=4 SV=1	0	FALSE		21.23	23	5	15	5	265	30	5.2			5.09		6.13	4.21			5.99			0	2.55		0					1		2	2			1			1	1		2
FALSE	High	Master Protein	A0A088AEV8	Uncharacterized protein OS=Apis mellifera OX=7460 GN=LOC726495 PE=4 SV=1	0	FALSE		44.784	63	9	52	9	202	23.1	8.47	19.9		2.15	0		13.2		16.46				6.56	4.08		0	1.62	23.48	7		1	1		6		8				6	2		1	3	7
FALSE	High	Master Protein	A0A088AJL8	Uncharacterized protein OS=Apis mellifera OX=7460 GN=LOC726571 PE=3 SV=1	0	FALSE		23.042	29	7	11	7	391	45.1	8.51								6.71								0	0								7								1	1
FALSE	High	Master Protein	A0A088AAG8	Uncharacterized protein OS=Apis mellifera OX=7460 GN=LOC726592 PE=4 SV=1	0	FALSE		15.751	10	2	15	2	459	47.7	4.2	6.32							25.67									0	1							2									1
FALSE	High	Master Protein	A0A088AJL4	Uncharacterized protein OS=Apis mellifera OX=7460 GN=LOC726625 PE=4 SV=1	0	FALSE		41.167	23	8	12	8	537	59.9	8.31									20		0				2.91	3.84										5		1				1	2
FALSE	High	Master Protein	A0A087ZUV3	Uncharacterized protein OS=Apis mellifera OX=7460 GN=LOC726629 PE=4 SV=1	0.008	FALSE		2.874	20	1	1	1	119	13.3	10.11																	0																	1
FALSE	High	Master Protein	A0A087ZST0	Uncharacterized protein OS=Apis mellifera OX=7460 GN=LOC726689 PE=4 SV=1	0	FALSE		5.268	9	1	2	1	126	14.9	9.09	3.89																	1
FALSE	High	Master Protein	A0A088ALL7	Uncharacterized protein OS=Apis mellifera OX=7460 GN=LOC726747 PE=4 SV=1	0	FALSE		15.699	25	3	74	3	81	9.3	9.76	12.74		21.98	6.48	18.79	14.72	7.86		16.37	1.94		10.25	10.91	5.45	8.9	2.31		2		3	1	3	3	2		3	2		2	3	1	2	2
FALSE	High	Master Protein	A0A087ZUV0	Uncharacterized protein OS=Apis mellifera OX=7460 GN=LOC726750 PE=4 SV=1	0	FALSE		42.139	8	7	47	7	1483	136.8	6.05	25.24	2.13	2.91	2.48	18.85	3.08	5.42	2.3		11.12					2.51			6	1	1	3	4	1	3	1		5					1
FALSE	High	Master Protein	A0A087ZN03	Uncharacterized protein OS=Apis mellifera OX=7460 GN=LOC726759 PE=4 SV=1	0	FALSE		7.33	2	2	2	2	1185	132.5	8.79									1.9						2.37											1						1
FALSE	High	Master Protein	A0A087ZZE1	Uncharacterized protein OS=Apis mellifera OX=7460 GN=LOC726833 PE=4 SV=1	0	FALSE		4.768	2	1	2	1	525	58.4	4.97	2.48											1.72						1											1
FALSE	High	Master Protein	A0A087ZYV9	Uncharacterized protein OS=Apis mellifera OX=7460 GN=LOC726855 PE=4 SV=1	0	FALSE		5.897	5	2	2	2	366	36.5	5.64																0																	2
FALSE	High	Master Protein	A0A088A314	Uncharacterized protein OS=Apis mellifera OX=7460 GN=LOC726894 PE=4 SV=1	0	FALSE		4.327	10	1	3	1	107	12.3	8.53			2.78		2.25				2.22											1		1				1
FALSE	High	Master Protein	A0A088A5N5	Uncharacterized protein OS=Apis mellifera OX=7460 GN=LOC726955 PE=4 SV=1	0	FALSE		4.074	5	1	1	1	252	29.4	8.35												0																	1
FALSE	High	Master Protein	A0A087ZVB6	Uncharacterized protein OS=Apis mellifera OX=7460 GN=LOC726981 PE=4 SV=1	0.009	FALSE		2.645	4	1	2	1	249	27.7	6.58				1.61																	1
FALSE	High	Master Protein	A0A088A2Z6	Uncharacterized protein OS=Apis mellifera OX=7460 GN=LOC726990 PE=4 SV=1	0	FALSE		5.633	10	2	5	2	292	33.2	7.2					0					0												1					2
FALSE	High	Master Protein	A0A088A959	Uncharacterized protein OS=Apis mellifera OX=7460 GN=LOC726995 PE=4 SV=1	0	FALSE		41.507	36	6	22	6	183	20.7	5.41	0		9.99			4.75	37.76					2.39						1		2			1	6					1
FALSE	High	Master Protein	A0A087ZV28	Uncharacterized protein OS=Apis mellifera OX=7460 GN=LOC727010 PE=4 SV=1	0	FALSE		36.644	28	4	7	4	248	26.8	8.4	19.44																	4
FALSE	High	Master Protein	A0A087ZQE3	Uncharacterized protein OS=Apis mellifera OX=7460 GN=LOC727126 PE=4 SV=1	0	FALSE		16.184	27	3	15	3	153	17.2	5.48			6.97			2.12			0				0		4.98					2			2			1				1		3
FALSE	High	Master Protein	A0A088AQG0	Uncharacterized protein OS=Apis mellifera OX=7460 GN=LOC727141 PE=4 SV=1	0.008	FALSE		3.035	5	1	1	1	357	40.6	5.44					0																	1
FALSE	High	Master Protein	A0A087ZSB8	Uncharacterized protein OS=Apis mellifera OX=7460 GN=LOC727232 PE=4 SV=1	0	FALSE		71.774	22	12	23	12	904	98.4	8.37					4.61	2.05			21.26				2.18		13.27							4	1			7				2		4
FALSE	High	Master Protein	A0A087ZXS3	Uncharacterized protein OS=Apis mellifera OX=7460 GN=LOC727344 PE=4 SV=1	0	FALSE		18.172	10	4	7	4	420	48.6	5.48								9.36			0						2.1								3			1						1
FALSE	High	Master Protein	A0A088A6Y5	Uncharacterized protein OS=Apis mellifera OX=7460 GN=LOC727354 PE=4 SV=1	0	FALSE		30.815	34	6	8	6	286	32.5	5.1	1.69										0			0	10	0		2										1			1	3	1
FALSE	High	Master Protein	A0A087ZYC0	Uncharacterized protein OS=Apis mellifera OX=7460 GN=LOC727408 PE=4 SV=1	0	FALSE		74.782	24	18	54	18	951	110.3	6.47					11.83	37.07	0		34.62			2.74	3.97		9.56							3	16	3		11			3	2		4
FALSE	High	Master Protein	A0A087ZXS2	Uncharacterized protein OS=Apis mellifera OX=7460 GN=LOC727522 PE=4 SV=1	0	FALSE		4.58	13	2	2	2	226	25.6	5.9								1.66																	2
FALSE	High	Master Protein	A0A088A6Z2	Uncharacterized protein OS=Apis mellifera OX=7460 GN=Lys-3 PE=4 SV=1	0	FALSE		18.918	35	3	8	3	153	17.1	4.88	5.54						0	0							0		0	2						1	2							1		1
FALSE	High	Master Protein	A0A088A3A2	Uncharacterized protein OS=Apis mellifera OX=7460 GN=mge PE=4 SV=1	0	FALSE		26.725	58	5	22	5	143	15.7	4.23	2.81		3.02	3.73	5.94	5.24	1.79		5.19			2.4	3.07	2.58	6.15			1		1	1	1	1	1		2			1	3	2	2
FALSE	High	Master Protein	A0A088AJL9	Uncharacterized protein OS=Apis mellifera OX=7460 GN=Mhc2 PE=3 SV=1	0	FALSE		112.14	14	19	38	19	1980	228	5.53			21.81			4.42			19.94				4.08	2.17	36.53					8			2			6				5	2	11
FALSE	High	Master Protein	A0A087ZND8	Uncharacterized protein OS=Apis mellifera OX=7460 GN=Mlc2 PE=4 SV=1	0	FALSE		313.814	85	18	855	18	213	23.5	4.89	246.33		209.35	0	318.49	128.73	146.69	13.16	145.69	50.75	184.76	220.57	135	530.73	166.37	154.49		15		15	1	15	12	11	3	14	12	14	15	11	16	9	11
FALSE	High	Master Protein	A0A088ASU4	Uncharacterized protein OS=Apis mellifera OX=7460 GN=Mlc-c PE=4 SV=1	0	FALSE		22.363	41	4	18	4	155	17.6	4.87			7.5		0	2.75			0	0		0		4.44		2.33	2.09			2		2	2			1	2		1		3		2	1
FALSE	High	Master Protein	A0A088AET5	Uncharacterized protein OS=Apis mellifera OX=7460 GN=mRpL1 PE=4 SV=1	0	FALSE		10.407	5	1	1	1	351	41.1	9.04															3.91																	1
FALSE	High	Master Protein	A0A088AH49	Uncharacterized protein OS=Apis mellifera OX=7460 GN=mRpL13 PE=3 SV=1	0	FALSE		12.735	23	3	3	3	178	21.1	9.22									2.56						0											2						1
FALSE	High	Master Protein	A0A088A2Z8	Uncharacterized protein OS=Apis mellifera OX=7460 GN=mRpL17 PE=4 SV=1	0	FALSE		4.243	7	1	2	1	180	21.3	9.82						1.76			2.47														1			1
FALSE	High	Master Protein	A0A088AUS6	Uncharacterized protein OS=Apis mellifera OX=7460 GN=mRpL19 PE=4 SV=1	0	FALSE		6.492	7	1	1	1	300	35.7	8.97															3.69																	1
FALSE	High	Master Protein	A0A088AFV4	Uncharacterized protein OS=Apis mellifera OX=7460 GN=mRpL28 PE=4 SV=1	0.006	FALSE		3.452	4	1	1	1	274	32.8	9.35															2.25																	1
FALSE	High	Master Protein	A0A088ANR4	Uncharacterized protein OS=Apis mellifera OX=7460 GN=mRpL3 PE=4 SV=1	0	FALSE		6.833	6	1	1	1	364	41.3	9.94															3.34																	1
FALSE	High	Master Protein	A0A088ASM8	Uncharacterized protein OS=Apis mellifera OX=7460 GN=mRpL35 PE=4 SV=1	0.007	FALSE		3.145	4	1	2	1	185	22.1	10.83					0				0													1				1
FALSE	High	Master Protein	A0A088AHA1	Uncharacterized protein OS=Apis mellifera OX=7460 GN=mRpL41 PE=4 SV=1	0	FALSE		6.196	16	2	2	2	167	19.6	9.51									0					1.66												1					1
FALSE	High	Master Protein	A0A088AAI2	Uncharacterized protein OS=Apis mellifera OX=7460 GN=mRpS18B PE=4 SV=1	0	FALSE		4.083	10	2	2	2	189	22.1	9.17	0											1.6						1											1
FALSE	High	Master Protein	A0A088A204	Uncharacterized protein OS=Apis mellifera OX=7460 GN=mRpS2 PE=3 SV=1	0	FALSE		5.421	6	1	2	1	259	29.6	8.22									0																	1
FALSE	High	Master Protein	A0A088APH0	Uncharacterized protein OS=Apis mellifera OX=7460 GN=mRpS30 PE=4 SV=1	0.006	FALSE		3.463	3	1	1	1	551	65	9.01									0																	1
FALSE	High	Master Protein	A0A088AAQ6	Uncharacterized protein OS=Apis mellifera OX=7460 GN=mRpS33 PE=4 SV=1	0	FALSE		4.292	8	1	1	1	108	13.3	10.11															2.5																	1
FALSE	High	Master Protein	A0A088AJB4	Uncharacterized protein OS=Apis mellifera OX=7460 GN=mRpS6 PE=4 SV=1	0.004	FALSE		3.682	7	1	1	1	150	17.7	9.5															2.46																	1
FALSE	High	Master Protein	A0A088A8Y4	Uncharacterized protein OS=Apis mellifera OX=7460 GN=msps PE=4 SV=1	0	FALSE		6.794	1	2	2	2	1985	223	7.99									1.61																	2
FALSE	High	Master Protein	A0A088A0N4	Uncharacterized protein OS=Apis mellifera OX=7460 GN=Mtch PE=3 SV=1	0.008	FALSE		2.995	4	1	2	1	313	35.6	8.9			2.35		0															1		1
FALSE	High	Master Protein	A0A088AR18	Uncharacterized protein OS=Apis mellifera OX=7460 GN=Mvl PE=3 SV=1	0	FALSE		10.195	7	3	5	3	587	65.6	6.62			2.49							0					1.62					2							1					1
FALSE	High	Master Protein	A0A088A019	Uncharacterized protein OS=Apis mellifera OX=7460 GN=Myo1A PE=3 SV=1	0	FALSE		16.173	5	4	4	4	1017	118	9.14			0			0							1.66		3.55					1			1							1		1
FALSE	High	Master Protein	A0A088A390	Uncharacterized protein OS=Apis mellifera OX=7460 GN=Ndufa5 PE=4 SV=1	0	FALSE		41.824	69	7	109	7	118	13.8	8.37	14.85		14.31	20.16	31.85	29.01	14.54		33.3	4.64		32.71	10.83	11.89	13.53	7.94	0	5		3	5	6	6	5		6	3		6	3	3	3	3	1
FALSE	High	Master Protein	A0A088ATD6	Uncharacterized protein OS=Apis mellifera OX=7460 GN=Ndufb6 PE=4 SV=1	0	FALSE		30.379	33	6	50	6	161	18.9	9.82	2.7		10.11	4.38	14.67	7.23	2.37		13.13	0		3.79	9.4		16.66	5.45		3		2	3	3	2	2		3	1		1	4		4	2
FALSE	High	Master Protein	A0A088A768	Uncharacterized protein OS=Apis mellifera OX=7460 GN=Ndufs4 PE=4 SV=1	0	FALSE		39.079	48	6	26	6	186	21.6	9.52	2.51		6.52	4.3	11.57	8.4	2.3		12.49			5.17	0	0	6.32			1		2	3	3	2	2		4			2	1	1	2
FALSE	High	Master Protein	A0A088AFL8	Uncharacterized protein OS=Apis mellifera OX=7460 GN=Ndufs8 PE=3 SV=1	0	FALSE		35.083	35	6	70	6	201	23.3	5.92	5.48		10.81	3.51	12.7	19.29	1.77		29.99	0	0	8.77	3.63	5.51	16.21	2.56		3		4	3	4	5	3		6	1	1	3	3	1	4	1
FALSE	High	Master Protein	A0A087ZU85	Uncharacterized protein OS=Apis mellifera OX=7460 GN=Ndufv2 PE=4 SV=1	0	FALSE		80.598	47	9	99	9	243	27.4	8	21.84		28.71	22.84	32.09	25.89	8.74		31.27	2.47		11.4	13.53	6.32	29.02	0		7		4	6	7	7	5		5	1		4	4	3	5	1
FALSE	High	Master Protein	A0A088AKD7	Uncharacterized protein OS=Apis mellifera OX=7460 GN=Nep2 PE=4 SV=1	0	FALSE		5.769	2	1	1	1	775	88.5	6.58					2.6																	1
FALSE	High	Master Protein	A0A087ZVN6	Uncharacterized protein OS=Apis mellifera OX=7460 GN=Nipsnap PE=4 SV=1	0	FALSE		27.785	24	5	25	5	283	33	9.47	9.19		5.91	4.05	5.91	15.79			3.27	0	2.59	7.64				2.34		2		1	2	2	5			1	1	2	2				1
FALSE	High	Master Protein	A0A088A7C0	Uncharacterized protein OS=Apis mellifera OX=7460 GN=nkd PE=4 SV=1	0.008	FALSE		2.829	4	1	1	1	604	66.6	9.77									2.02																	1
FALSE	High	Master Protein	A0A088A4D5	Uncharacterized protein OS=Apis mellifera OX=7460 GN=nrv2 PE=4 SV=1	0	FALSE		68.1	56	13	94	12	322	36.9	7.91	0		19.27	33.38	27.34	15.25			21.28	2.17		2.14	5.64	4.52	17.36	0		4		7	11	8	4			8	4		1	6	2	6	2
FALSE	High	Master Protein	A0A087ZWC1	Uncharacterized protein OS=Apis mellifera OX=7460 GN=NUP205 PE=4 SV=1	0	FALSE		10.852	2	2	2	2	1918	219.2	6.6															5.86																	2
FALSE	High	Master Protein	A0A088AV89	Uncharacterized protein OS=Apis mellifera OX=7460 GN=Oscp PE=3 SV=1	0	FALSE		101.203	56	12	229	12	207	22.6	9.73	33.13		43.88	19.68	68.49	35.39	14.89	0	38.4	5.97	11.76	33.61	29.8	12.26	82.68	18.49	0	6		7	6	8	8	5	1	8	5	5	6	6	5	9	7	1
FALSE	High	Master Protein	A0A088ABL3	Uncharacterized protein OS=Apis mellifera OX=7460 GN=P58IPK PE=4 SV=1	0	FALSE		9.041	6	3	4	3	482	55.5	6.95	0					2.01			0						2.19			1					1			1						1
FALSE	High	Master Protein	A0A088ARH1	Uncharacterized protein OS=Apis mellifera OX=7460 GN=pck PE=4 SV=1	0	FALSE		10.838	12	2	2	2	234	27.4	7.8													0		3.67															1		1
FALSE	High	Master Protein	A0A088ASJ9	Uncharacterized protein OS=Apis mellifera OX=7460 GN=Pgm1 PE=3 SV=1	0	FALSE		24.924	19	8	13	8	563	61.9	6.48	0			0				0	2.8				0	2.1		1.79		1			1				3	1				1	3		3
FALSE	High	Master Protein	A0A087ZR35	Uncharacterized protein OS=Apis mellifera OX=7460 GN=pita PE=4 SV=1	0	FALSE		20.066	7	5	6	5	1217	140.1	5.95			0										2.51		5.01	0				1										2		2	1
FALSE	High	Master Protein	A0A087ZR09	Uncharacterized protein OS=Apis mellifera OX=7460 GN=pix PE=4 SV=1	0	FALSE		9.174	5	2	5	2	608	68.4	7.94	0					0					0	2.85						1					1					1	2
FALSE	High	Master Protein	A0A087ZUY6	Uncharacterized protein OS=Apis mellifera OX=7460 GN=Pka-R1 PE=4 SV=1	0	FALSE		56.582	44	8	37	8	321	35.5	4.93	20.15		2.07			15.97		4.77			7.56	3.38		14.24		4.95		5		1			4		2			5	3		4		3
FALSE	High	Master Protein	A0A088AVS0	Uncharacterized protein OS=Apis mellifera OX=7460 GN=Pmi PE=4 SV=1	0	FALSE		6.626	11	1	6	1	175	19.5	4.87			3.61	2.33	5.69	2.81														1	1	1	1
FALSE	High	Master Protein	A0A088ACZ3	Uncharacterized protein OS=Apis mellifera OX=7460 GN=porin PE=4 SV=1	0	FALSE		141.334	79	15	738	15	283	30.5	8.18	84.52		99.76	103.79	159.95	110.71	73.79	0	188.27	31.01	0	83.13	169.82	212.46	348.02	88.35	5.78	10		9	10	12	11	9	2	12	9	2	11	11	10	11	11	6
FALSE	High	Master Protein	A0A088A2D7	Uncharacterized protein OS=Apis mellifera OX=7460 GN=pot PE=4 SV=1	0	FALSE		28.141	13	7	7	7	996	111	6.39							7.77																	7
FALSE	High	Master Protein	A0A088A9Q2	Uncharacterized protein OS=Apis mellifera OX=7460 GN=Pros26 PE=4 SV=1	0	FALSE		23.298	25	4	5	4	236	26.1	5.95						2.34							2.58	4.6	2.47								1							1	2	1
FALSE	High	Master Protein	A0A088AVT5	Uncharacterized protein OS=Apis mellifera OX=7460 GN=Prp19 PE=4 SV=1	0	FALSE		12.755	6	2	3	2	504	55	6.84					2.17				2.77						2.63							1				1						1
FALSE	High	Master Protein	A0A088ABT0	Uncharacterized protein OS=Apis mellifera OX=7460 GN=pug PE=3 SV=1	0	FALSE		60.471	19	12	20	12	951	103.2	8.91	29.97					3.97		0							4.66			10					2		2							2
FALSE	High	Master Protein	A0A088A0S4	Uncharacterized protein OS=Apis mellifera OX=7460 GN=Pxn PE=4 SV=1	0	FALSE		7.286	2	2	2	2	1293	147.1	6.86									1.78						3.52											1						1
FALSE	High	Master Protein	A0A087ZZ92	Uncharacterized protein OS=Apis mellifera OX=7460 GN=R PE=4 SV=1	0	FALSE		74.365	58	10	83	10	184	20.9	6.71	2.39		29.7	11.48	20.69	12.7			19.47	0		2.27	28.38	12.99	36.71	8.95	0	2		8	4	5	4			4	1		2	7	4	8	4	2
FALSE	High	Master Protein	A0A087ZVR2	Uncharacterized protein OS=Apis mellifera OX=7460 GN=Rab10 PE=4 SV=1	0	FALSE		31.083	34	6	58	4	200	22.9	7.4	2.6	0	15.74	4.6	7.92	7.73	1.76		13.86	2.02	2.48	14.92	5.08	12.09	8.33	6.16	0	2	1	3	2	2	3	2		3	2	2	5	2	2	3	3	1
FALSE	High	Master Protein	A0A087ZNX0	Uncharacterized protein OS=Apis mellifera OX=7460 GN=Rab11 PE=4 SV=1	0	FALSE		59.517	54	9	120	9	215	24.4	6.01	16.27		20.85	23.16	25.32	28.67	3.76	0	32.04	10.81	0	13.8	12.17	10.69	49.25	15.44	1.91	7		7	8	7	8	2	2	7	6	4	5	4	3	9	5	2
FALSE	High	Master Protein	A0A088A3U8	Uncharacterized protein OS=Apis mellifera OX=7460 GN=Rab14 PE=4 SV=1	0	FALSE		37.644	40	7	42	6	218	24.3	6.68	8.02	0	11.09	2.13	9.29	8.47	0		11.18	0	2.48	10.72	5.7	8.99	8.29	4.33	0	3	1	4	1	2	3	1		4	1	1	4	2	2	3	1	2
FALSE	High	Master Protein	A0A088AML5	Uncharacterized protein OS=Apis mellifera OX=7460 GN=Rab3 PE=4 SV=1	0	FALSE		24.038	26	5	27	4	269	30.6	5.47		0	4.63	13.08		2.56	0		2.55		2.48	4.97	2.81	4.74	2.74	4.33	0		1	1	4		1	1		1		1	1	1	1	1	1	1
FALSE	High	Master Protein	A0A087ZMS7	Uncharacterized protein OS=Apis mellifera OX=7460 GN=Rab39 PE=4 SV=1	0	FALSE		20.323	20	3	20	2	218	24.7	6.3	10.72		2.36	5.03	8.33	4.7	2.29		2.93	2		2.45			7.55			1		1	1	1	2	1		1	1		1			2
FALSE	High	Master Protein	A0A087ZVJ9	Uncharacterized protein OS=Apis mellifera OX=7460 GN=Rab6 PE=4 SV=1	0	FALSE		35.757	52	8	60	7	209	23.6	5.53	16.22		9.53	20.42	16.6	11.84	2.29		11.54	3.66		9.95	1.68	4.56	17.6	5.92	0	2		4	6	3	4	1		4	2		5	1	3	5	4	1
FALSE	High	Master Protein	A0A088AW65	Uncharacterized protein OS=Apis mellifera OX=7460 GN=Rab-RP4 PE=4 SV=1	0	FALSE		5.457	5	1	1	1	223	25.4	6.13															2.38																	1
FALSE	High	Master Protein	A0A0B4J2M1	Uncharacterized protein OS=Apis mellifera OX=7460 GN=Rac PE=4 SV=1	0	FALSE		55.152	60	9	108	8	192	21.5	8.15	1.62		40.82	5.38	13.55	20.88	0		13.44	0		5.52	18.78	5.44	21.32	0		1		9	7	6	8	1		7	3		5	6	2	6	2
FALSE	High	Master Protein	A0A088AHI9	Uncharacterized protein OS=Apis mellifera OX=7460 GN=RANBP2 PE=4 SV=1	0	FALSE		6.789	1	1	1	1	2804	316.2	5.82															3.79																	1
FALSE	High	Master Protein	A0A088ARZ9	Uncharacterized protein OS=Apis mellifera OX=7460 GN=Rap2l PE=4 SV=1	0	FALSE		8.408	19	2	4	2	181	20.3	5.43			2.62			2.28									6.29					1			1									2
FALSE	High	Master Protein	A0A088ATB4	Uncharacterized protein OS=Apis mellifera OX=7460 GN=Rbcn-3B PE=4 SV=1	0.008	FALSE		2.699	1	1	1	1	1514	167.6	7.47															1.75																	1
FALSE	High	Master Protein	A0A088AQM1	Uncharacterized protein OS=Apis mellifera OX=7460 GN=Rheb PE=4 SV=1	0	FALSE		5.19	14	2	2	2	182	20.5	5.38																0																	2
FALSE	High	Master Protein	A0A0B4J2N2	Uncharacterized protein OS=Apis mellifera OX=7460 GN=Rho1 PE=4 SV=1	0	FALSE		81.501	65	10	112	10	213	23.9	5.57	12.27		43.27	7.23	22.88	15.54			30.25	2.91	0	14.69	12.07	13.3	13.5	0		6		8	7	6	6			7	4	4	7	4	3	4	1
FALSE	High	Master Protein	A0A087ZWQ5	Uncharacterized protein OS=Apis mellifera OX=7460 GN=rin PE=4 SV=1	0	FALSE		25.649	12	4	8	4	614	67.9	6.54	0								9.8					0	4.23			1								4					1	2
FALSE	High	Master Protein	A0A088A059	Uncharacterized protein OS=Apis mellifera OX=7460 GN=Rox8 PE=4 SV=1	0	FALSE		9.806	6	2	3	2	392	43.3	8.13	3.98														2.74			2														1
FALSE	High	Master Protein	A0A088A6M9	Uncharacterized protein OS=Apis mellifera OX=7460 GN=RpL12 PE=3 SV=1	0	FALSE		51.587	55	7	55	7	165	17.9	9.69	2.45		10.1	1.85	10.2	5.12			22.95		0	15.58	8.37	11.42	23.03	10.19		2		3	1	3	3			5		2	4	3	4	4	5
FALSE	High	Master Protein	A0A088AJ39	Uncharacterized protein OS=Apis mellifera OX=7460 GN=RpL13A PE=3 SV=1	0	FALSE		24.029	37	8	33	8	204	23.3	11.36	4.56		8.84	1.97	10.15	4.94			10.4	0		2.56	4.83	0	11.96	2.38		2		2	1	4	3			5	1		1	3	1	3	1
FALSE	High	Master Protein	A0A087ZQJ6	Uncharacterized protein OS=Apis mellifera OX=7460 GN=RpL17 PE=3 SV=1	0	FALSE		31.818	22	4	47	4	185	21.4	10.1	9.46		17.85	2.23	16.18	12.83			31.5	0		6.18	5.92		11.84	2.23		2		4	1	4	3			4	1		2	2		2	1
FALSE	High	Master Protein	A0A0B4J2P6	Uncharacterized protein OS=Apis mellifera OX=7460 GN=RpL21 PE=4 SV=1	0	FALSE		45.853	41	7	39	7	159	18.3	10.64			14.61	0	10.17	5.47			12.15			2.68	13.41	16.63	13.68	1.81				4	1	2	3			4			1	4	3	4	1
FALSE	High	Master Protein	A0A088AMG7	Uncharacterized protein OS=Apis mellifera OX=7460 GN=RpL22 PE=4 SV=1	0	FALSE		47.029	38	5	40	5	139	16.2	9.5	8.05		6.63		20.56				24.76	0		6.14	8.14	6.37	35.91	6.38		2		1		3				4	2		3	2	3	4	3
FALSE	High	Master Protein	A0A088AHQ5	Uncharacterized protein OS=Apis mellifera OX=7460 GN=RpL23 PE=3 SV=1	0	FALSE		39.752	54	7	79	7	140	14.8	10.58	8.4		27.97	9.84	24.07	20.76	0		22.28	0	0	17.5	26.53	17.4	65.59	4.75		2		3	3	3	3	2		2	1	1	4	6	4	4	3
FALSE	High	Master Protein	A0A088ASZ3	Uncharacterized protein OS=Apis mellifera OX=7460 GN=RpL31 PE=4 SV=1	0	FALSE		25.706	40	6	36	6	123	14.2	10.49	8.55		6.49	2.21	9.74	9.01			8.94			4.4	2.44		4.62	2.14	0	3		4	1	4	2			3			2	2		3	2	1
FALSE	High	Master Protein	A0A087ZS49	Uncharacterized protein OS=Apis mellifera OX=7460 GN=RpL34 PE=3 SV=1	0	FALSE		6.943	21	3	16	3	118	14.1	11.21	0		1.85		0	0			1.69				2.25		0	0		1		3		1	1			3				3		1	2
FALSE	High	Master Protein	A0A087ZNY9	Uncharacterized protein OS=Apis mellifera OX=7460 GN=RpL35 PE=3 SV=1	0	FALSE		18.618	19	4	14	4	123	14.4	10.9			3.15		1.95	5.39			3.53				3.42		6.93	2.59				1		1	2			2				2		1	2
FALSE	High	Master Protein	A0A087ZV22	Uncharacterized protein OS=Apis mellifera OX=7460 GN=RpL35A PE=3 SV=1	0	FALSE		17.091	32	6	25	6	146	16.7	10.98	0		2.56		2.24	2.46			1.67				2.69	3.58	8.11			2		1		3	2			2				3	1	3
FALSE	High	Master Protein	A0A087ZYP6	Uncharacterized protein OS=Apis mellifera OX=7460 GN=RpL36A PE=3 SV=1	0	FALSE		7.263	20	2	5	2	104	12.5	10.78			2.78		0	1.96			4.94											1		1	1			2
FALSE	High	Master Protein	A0A087ZQN9	Uncharacterized protein OS=Apis mellifera OX=7460 GN=RpL38 PE=3 SV=1	0	FALSE		13.332	40	4	29	4	75	8.9	10.26	4.9		7.4	0	8.3	6.58			5.31	2.05		5.52	2.14	1.82	2.27			3		2	1	3	2			3	1		2	1	1	2
FALSE	High	Master Protein	A0A088A8G1	Uncharacterized protein OS=Apis mellifera OX=7460 GN=Rpl39 PE=3 SV=1	0	FALSE		5.849	20	1	8	1	51	6.4	12.56			2.5		2.53				2.99			0	5.98		3.39					1		1				1			1	1		1
FALSE	High	Master Protein	A0A088A0L9	Uncharacterized protein OS=Apis mellifera OX=7460 GN=RpL9 PE=4 SV=1	0	FALSE		55.028	53	8	66	8	190	21.5	9.86	10.44		10.45	5.75	15.62	14.28			25.92	0		13.3	15.84	7.2	24.26	10.19		3		4	3	5	6			8	1		6	5	1	5	4
FALSE	High	Master Protein	A0A088AHE1	Uncharacterized protein OS=Apis mellifera OX=7460 GN=RpLP1 PE=3 SV=1	0	FALSE		74.594	92	8	112	8	111	11.6	4.5	23.87	0	13.63	11.11	26.68	13.07	4.08	0	24.42	9.25	10.33	21.26	20.09	35.24	41.36	21.75	2.54	5	1	2	2	5	2	1	2	4	2	2	4	4	5	7	6	1
FALSE	High	Master Protein	A0A088AFV5	Uncharacterized protein OS=Apis mellifera OX=7460 GN=RpLP2 PE=3 SV=1	0	FALSE		53.366	82	7	68	7	114	12	4.56	17.48		3.13	0	14.19	5.69	0	1.84	13.95	11.13	10.11	17.65	2.74	19.82	24.56	5.69	3.24	3		1	1	2	1	1	2	5	5	3	5	2	4	4	2	2
FALSE	High	Master Protein	A0A087ZUL8	Uncharacterized protein OS=Apis mellifera OX=7460 GN=RpS15 PE=3 SV=1	0	FALSE		56.522	55	5	65	5	147	16.9	10.37	17.96		24.25		24.76	13.98			24.09			15.92	3.16	6.83	17.62	0		3		3		4	2			4			3	3	1	3	1
FALSE	High	Master Protein	A0A088A612	Uncharacterized protein OS=Apis mellifera OX=7460 GN=RpS16 PE=3 SV=1	0	FALSE		18.867	43	7	54	7	148	16.9	10.18	6.4		12.29	0	11.49	3.71			8.58			3.96	12.59	6.59	14.54	2.1		4		4	2	5	4			4			2	5	2	4	2
FALSE	High	Master Protein	A0A088ANM8	Uncharacterized protein OS=Apis mellifera OX=7460 GN=RpS17 PE=3 SV=1	0	FALSE		40.101	61	6	60	6	131	15.4	9.82	6.76		21.48	0	7.86	12.89			25.38	0		12.28	2.32	4.83	20.47	4.64		3		5	1	3	4			4	1		4	2	3	5	3
FALSE	High	Master Protein	H9KEI2	Uncharacterized protein OS=Apis mellifera OX=7460 GN=RpS19a PE=4 SV=1	0	FALSE		40.377	34	8	60	8	154	17.3	10.42	4.21		9.77	1.97	7.29	10.08	0		14.39	0	0	10.87	17.94	7.71	18.55	6.98		3		3	3	3	4	2		5	1	2	5	4	2	5	3
FALSE	High	Master Protein	A0A088AG18	Uncharacterized protein OS=Apis mellifera OX=7460 GN=Sap-r PE=4 SV=1	0	FALSE		42.95	20	14	57	14	887	100	5.5	0		0	8.65	14.21	0	9.11			2.15	7.05	2.02		0		1.79	0	2		2	7	7	1	6			3	7	2		1		5	1
FALSE	High	Master Protein	A0A088A8Z2	Uncharacterized protein OS=Apis mellifera OX=7460 GN=scf PE=4 SV=1	0	FALSE		29.42	19	5	9	5	324	37.7	4.61	4.81			2.2				0						10.3			2.17	2			1				1						4			1
FALSE	High	Master Protein	A0A088AMD5	Uncharacterized protein OS=Apis mellifera OX=7460 GN=SdhC PE=4 SV=1	0	FALSE		7.716	9	1	3	1	174	19.2	8.88			4.07		4.04	3.37														1		1	1
FALSE	High	Master Protein	A0A088ARB1	Uncharacterized protein OS=Apis mellifera OX=7460 GN=shrb PE=4 SV=1	0	FALSE		29.133	26	4	38	4	221	24.9	4.82			4		17.3	12.13	2.42		13.43			10.06			11.65					1		3	1	1		2			2			2
FALSE	High	Master Protein	A0A088AV18	Uncharacterized protein OS=Apis mellifera OX=7460 GN=skp1 PE=3 SV=1	0	FALSE		16.749	35	3	4	3	162	18.5	4.5	1.86													2.04		0		1													2		1
FALSE	High	Master Protein	A0A088A0Y4	Uncharacterized protein OS=Apis mellifera OX=7460 GN=Snap PE=4 SV=1	0	FALSE		66.666	55	12	78	12	292	33.3	5.55	10.91		6.08	21.7	21.83	13.35		0	2.17	0	7.96	21.94	7.08	4.47	14.94	6.5		4		2	8	7	5		1	1	5	10	9	3	3	5	5
FALSE	High	Master Protein	A0A088A3K0	Uncharacterized protein OS=Apis mellifera OX=7460 GN=snapin PE=4 SV=1	0.001	FALSE		3.897	13	1	4	1	158	18.1	5.08	0					0			0			0						1					1			1			1
FALSE	High	Master Protein	A0A088AET0	Uncharacterized protein OS=Apis mellifera OX=7460 GN=Sply PE=3 SV=1	0.007	FALSE		3.131	2	1	1	1	549	61.6	8.51									0																	1
FALSE	High	Master Protein	A0A088ATP6	Uncharacterized protein OS=Apis mellifera OX=7460 GN=Srp19 PE=4 SV=1	0	FALSE		5.178	9	1	1	1	146	16.5	10.2															0																	1
FALSE	High	Master Protein	A0A088A8V7	Uncharacterized protein OS=Apis mellifera OX=7460 GN=SrpRbeta PE=4 SV=1	0	FALSE		4.029	7	1	1	1	244	27.7	8.21									0																	1
FALSE	High	Master Protein	A0A088AW94	Uncharacterized protein OS=Apis mellifera OX=7460 GN=Surf4 PE=4 SV=1	0	FALSE		32.857	24	6	20	6	270	30.4	8.16			2.59		6.74	0			11.55	0			1.88		9.73	0				1		4	1			3	1			1		3	1
FALSE	High	Master Protein	A0A087ZQ38	Uncharacterized protein OS=Apis mellifera OX=7460 GN=Tapdelta PE=4 SV=1	0	FALSE		13.172	21	2	4	2	174	19.3	7.83			0										0		7.12					1										1		2
FALSE	High	Master Protein	A0A088A9Z0	Uncharacterized protein OS=Apis mellifera OX=7460 GN=TEPA PE=4 SV=1	0	FALSE		225.666	36	41	141	41	1612	184.9	6.62	3.75		128.25	0	6.73	31.94			26.88			2.59	33.29	2.46	74.15	5.29	0	4		28	1	3	10			15			3	11	4	19	7	4
FALSE	High	Master Protein	A0A088AFM4	Uncharacterized protein OS=Apis mellifera OX=7460 GN=TER94 PE=3 SV=1	0	FALSE		239.602	62	35	187	33	800	88.8	5.33	14.32		5.23	3.93	16.25	30.55		0	54.88		0	9	41.31	143.97	44.6	23.06	0	5		2	3	9	8		2	16		2	7	15	24	11	14	3
FALSE	High	Master Protein	A0A088AIG1	Uncharacterized protein OS=Apis mellifera OX=7460 GN=Tim17 PE=4 SV=1	0.008	FALSE		2.725	6	1	1	1	160	16.9	8.69															1.73																	1
FALSE	High	Master Protein	A0A088A0V7	Uncharacterized protein OS=Apis mellifera OX=7460 GN=tmod PE=4 SV=1	0	FALSE		100.154	40	13	93	13	444	49.7	4.96	3.6		13.84	2.97	35.65	20.44	2.42		42.58	1.95		21.65	9.31	42.86	30.52	2.66	0	2		6	5	7	6	1		7	1		7	7	10	7	1	1
FALSE	High	Master Protein	A0A087ZSA0	Uncharacterized protein OS=Apis mellifera OX=7460 GN=Tom7 PE=4 SV=1	0	FALSE		5.006	48	2	8	2	54	6.1	10.01			2.5		0	0			4.24			0	0							1		1	2			1			1	1
FALSE	High	Master Protein	A0A088A4X3	Uncharacterized protein OS=Apis mellifera OX=7460 GN=Trap1 PE=3 SV=1	0	FALSE		33.999	13	6	10	6	693	79.5	8.32			0						5.52		0	2		0	3.12					1						3		1	1		1	1
FALSE	High	Master Protein	A0A088AQ77	Uncharacterized protein OS=Apis mellifera OX=7460 GN=Tsf2 PE=4 SV=1	0	FALSE		133.009	41	23	71	23	829	94.5	6.54	4.51		55.72	0	12.39	19.47			4.33	1.69			14.56	0	49.45	2.2		2		16	1	6	8			1	1			6	1	13	3
FALSE	High	Master Protein	A0A088ARL2	Uncharacterized protein OS=Apis mellifera OX=7460 GN=U2A PE=4 SV=1	0	FALSE		7.821	13	2	2	2	246	28.4	7.93														0	2.4																1	1
FALSE	High	Master Protein	A0A088A5W9	Uncharacterized protein OS=Apis mellifera OX=7460 GN=Unc-89 PE=4 SV=1	0	FALSE		1431.09	42	192	1346	191	5693	641.3	5.62	70.06	1.73	43.86		462.76	337.87	9.12	0	737.54		0	105.03	397.97	398.76	765.17	10.89		31	1	17		102	97	15	1	139		5	46	94	85	125	11
FALSE	High	Master Protein	A0A088AC03	Uncharacterized protein OS=Apis mellifera OX=7460 GN=Uqcr11 PE=4 SV=1	0	FALSE		8.918	37	2	19	2	51	5.8	9.7			4.46	4.7	2.76	8.81	2.33		2.61	0		7.08	2.13			1.94				1	1	1	2	1		1	1		2	1			2
FALSE	High	Master Protein	A0A088A1P0	Uncharacterized protein OS=Apis mellifera OX=7460 GN=vari PE=3 SV=1	0	FALSE		126.655	42	19	89	19	603	68.2	6.09	0		32.74		14.44	31.76			12.23	0		3.66	15.07	14.86	59.46	10.04	0	1		8		4	9			6	2		4	10	6	11	5	1
FALSE	High	Master Protein	A0A087ZQ48	Uncharacterized protein OS=Apis mellifera OX=7460 GN=Vha26 PE=3 SV=1	0	FALSE		92.42	59	12	130	12	226	26.1	7.85	13.86	1.79	24.84	19.72	35.08	28.44	0	4.01	24.45	4.91	2.58	13.82	26.32	18.76	29.77	7.35	1.95	3	1	7	8	8	9	1	3	6	3	1	7	5	5	6	6	3
FALSE	High	Master Protein	A0A088AUP1	Uncharacterized protein OS=Apis mellifera OX=7460 GN=vib PE=4 SV=1	0	FALSE		33.342	35	7	15	7	271	31.5	6.65	10			5.87		1.82					1.64	0	6.76			1.86		4			4		1					1	1	3			1
FALSE	High	Master Protein	A0A088AER6	Uncharacterized protein OS=Apis mellifera OX=7460 GN=Vmp1 PE=4 SV=1	0.008	FALSE		2.763	2	1	1	1	410	46.7	8.88															1.94																	1
FALSE	High	Master Protein	A0A088AF24	Uncharacterized protein OS=Apis mellifera OX=7460 GN=Vps24 PE=4 SV=1	0	FALSE		6.294	6	1	1	1	221	24.9	5.12															3.14																	1
FALSE	High	Master Protein	A0A088A3I7	Uncharacterized protein OS=Apis mellifera OX=7460 GN=Vps4 PE=3 SV=1	0	FALSE		8.798	7	3	8	3	441	49.3	6.49											3.35	0			7.71	3.68												2	1			3	2
FALSE	High	Master Protein	A0A088AU17	Uncharacterized protein OS=Apis mellifera OX=7460 GN=Y-e PE=4 SV=1	0.008	FALSE		2.897	3	2	2	2	413	47.2	5.95	0																	2
FALSE	High	Master Protein	A0A087ZNU2	Uncharacterized protein OS=Apis mellifera OX=7460 GN=Ykt6 PE=3 SV=1	0	FALSE		7.434	11	2	6	2	200	22.7	8.13	1.83		1.61	0								1.67						2		1	2								1
FALSE	High	Master Protein	A0A088AMI6	Uncharacterized protein OS=Apis mellifera OX=7460 GN=Y-x1 PE=4 SV=1	0	FALSE		256.772	55	19	446	19	431	48.3	6.54	25.71	10.93	180.39	28.73	128.45	99.24	3.33	0	79.05	64.06	0	48.04	150.46	37.37	149.91	16.9	21.06	8	9	17	9	17	17	5	1	16	18	1	15	13	7	16	8	9
FALSE	High	Master Protein	A0A088AVG8	Uncharacterized protein OS=Apis mellifera OX=7460 GN=Y-x2 PE=4 SV=1	0	FALSE		50.567	25	8	14	8	409	46.3	6.14	25.75																	8
FALSE	High	Master Protein	A0A088A9K6	Uncharacterized protein OS=Apis mellifera OX=7460 PE=3 SV=1	0	FALSE		5.33	5	1	1	1	274	32.4	9.52															2.18																	1
FALSE	High	Master Protein	A0A087ZVG0	Uncharacterized protein OS=Apis mellifera OX=7460 PE=3 SV=1	0	FALSE		142.954	43	23	123	23	613	68.3	7.4	5.13		25.78	2.15	20.81	10.41			45.65		0	9	16.23	7.18	51.3	5.75		3		14	3	15	7			17		1	7	5	6	13	6
FALSE	High	Master Protein	A0A088AE98	Uncharacterized protein OS=Apis mellifera OX=7460 PE=3 SV=1	0	FALSE		18.018	22	5	9	5	353	36.8	7.46						4.35		0						4.8		3.35							2		1						1		3
FALSE	High	Master Protein	A0A088ADS8	Uncharacterized protein OS=Apis mellifera OX=7460 PE=3 SV=1	0	FALSE		10.791	13	2	2	2	350	38.7	6.93			0												3.07					1												1
FALSE	High	Master Protein	A0A088A4P9	Uncharacterized protein OS=Apis mellifera OX=7460 PE=3 SV=1	0	FALSE		85.996	40	15	49	15	529	58.2	6.71	10.82				2.4	12.97			13.81	0	4.08	4.46	6.74	10.99	25.6	7.03	0	4				2	5			5	1	4	3	4	5	5	7	1
FALSE	High	Master Protein	A0A088ACF4	Uncharacterized protein OS=Apis mellifera OX=7460 PE=3 SV=1	0	FALSE		255.932	48	30	525	26	655	72.4	5.34	116.82	2.78	82.69	48.37	61.57	68.02	7.27	15.28	129.17	35.84	61.55	79.34	122.8	183.73	178.56	95.14	27.71	23	1	20	15	15	14	2	9	20	14	18	18	19	16	20	19	15
FALSE	High	Master Protein	A0A088A448	Uncharacterized protein OS=Apis mellifera OX=7460 PE=3 SV=1	0	FALSE		51.921	52	9	90	9	180	20.4	5.71	22.06	0	6.75	13.29	3.91	11.6	4.3	2.6	9.44	6.2	16.41	15.18	8.55	2.63	2.34	5.55		7	1	4	4	2	4	2	4	4	3	7	3	4	1	1	3
FALSE	High	Master Protein	A0A088AD32	Uncharacterized protein OS=Apis mellifera OX=7460 PE=3 SV=1	0	FALSE		324.639	65	53	606	53	655	75.1	7.34	106.93	3.4	244.64	56.78	140.69	133.78	35.08	0	132.51	73.77	0	104.01	154.8	86.29	162.85	69.89		24	5	40	20	32	29	14	1	29	19	1	27	33	23	29	23
FALSE	High	Master Protein	A0A088ADL9	Uncharacterized protein OS=Apis mellifera OX=7460 PE=3 SV=1	0.006	FALSE		3.271	7	1	1	1	206	23.6	8.43	1.9																	1
FALSE	High	Master Protein	A0A088AN65	Uncharacterized protein OS=Apis mellifera OX=7460 PE=3 SV=1	0	FALSE		11.076	13	3	11	3	270	32	7.64	1.73				4.4			1.82							4.37	0	2.89	1				1			3							2	1	2
FALSE	High	Master Protein	A0A088AJQ9	Uncharacterized protein OS=Apis mellifera OX=7460 PE=3 SV=1	0	FALSE		10.936	2	2	2	2	1110	128.8	8.97															5.01																	2
FALSE	High	Master Protein	A0A087ZXU8	Uncharacterized protein OS=Apis mellifera OX=7460 PE=3 SV=1	0	FALSE		346.043	74	35	849	35	531	61.3	7.96	52.66		441.42	29.35	114.31	222.53	0		151.77	31.8	0	78.11	298.68	103.62	448.43	28.05	0	18		34	11	25	29	1		28	19	2	26	26	19	29	15	1
FALSE	High	Master Protein	A0A088ABS5	Uncharacterized protein OS=Apis mellifera OX=7460 PE=3 SV=1	0.008	FALSE		2.94	4	1	1	1	431	49.6	8.81					0																	1
FALSE	High	Master Protein	A0A088A891	Uncharacterized protein OS=Apis mellifera OX=7460 PE=3 SV=1	0	FALSE		27.627	6	6	10	6	1556	180.3	8.44									8.56					5.93	6.18											5					2	3
FALSE	High	Master Protein	A0A088ADQ6	Uncharacterized protein OS=Apis mellifera OX=7460 PE=3 SV=1	0	FALSE		39.58	44	6	57	6	129	13.9	10.61	12.78	0	11.81	4.02	12.87	8.62	3.56		13.28	0		8.75	17.53	3.89	30.17	2.4	0	3	1	3	2	2	3	2		4	2		4	4	1	5	1	1
FALSE	High	Master Protein	A0A088APP1	Uncharacterized protein OS=Apis mellifera OX=7460 PE=3 SV=1	0	FALSE		8.146	4	2	4	2	595	67.6	8.09					1.83				3.81						2.13							1				1						1
FALSE	High	Master Protein	A0A088A376	Uncharacterized protein OS=Apis mellifera OX=7460 PE=3 SV=1	0	FALSE		45.063	6	7	8	7	2094	242.9	9.07			2.28			3.04									11.99					3			1									4
FALSE	High	Master Protein	A0A087ZXF7	Uncharacterized protein OS=Apis mellifera OX=7460 PE=3 SV=1	0.008	FALSE		3.064	2	1	1	1	791	86.8	8.22																	0																	1
FALSE	High	Master Protein	A0A088AT41	Uncharacterized protein OS=Apis mellifera OX=7460 PE=3 SV=1	0	FALSE		11.837	16	4	10	4	338	38.1	7.01	1.68				1.62				2.52				0	0	1.68	0		1				1				3				1	1	1	1
FALSE	High	Master Protein	A0A088A395	Uncharacterized protein OS=Apis mellifera OX=7460 PE=3 SV=1	0	FALSE		87.748	43	18	83	18	534	60.9	6.83	24.66		9.72	0	1.75	14.15			17.55	0	4.13	10.83	3.61	12.01	29.41	6.9	0	10		3	5	3	7			7	3	8	6	2	7	9	4	1
FALSE	High	Master Protein	A0A088A7V7	Uncharacterized protein OS=Apis mellifera OX=7460 PE=3 SV=1	0	FALSE		17.578	13	4	15	4	501	55	8.4	4.44		3.68			3.31					1.79		2.26	5.31	7.68			1		2			2					2		1	2	2
FALSE	High	Master Protein	A0A088AHG5	Uncharacterized protein OS=Apis mellifera OX=7460 PE=3 SV=1	0	FALSE		99.408	45	15	209	13	397	45.1	5.58	38.35	3.95	20.36	36.52	21.93	35.42	2.84	29.35	20.67	16.46	18.4	22.24	16.82	26.84	5.3	24.16	10.15	11	2	6	10	6	10	2	10	5	8	8	6	7	9	2	8	6
FALSE	High	Master Protein	A0A088A6T0	Uncharacterized protein OS=Apis mellifera OX=7460 PE=3 SV=1	0	FALSE		31.222	14	9	11	9	909	101.7	8.25				6.76											0						9											1
FALSE	High	Master Protein	A0A087ZQ05	Uncharacterized protein OS=Apis mellifera OX=7460 PE=3 SV=1	0	FALSE		19.627	12	5	7	5	637	70.3	6.62							10.8																	5
FALSE	High	Master Protein	A0A087ZUJ1	Uncharacterized protein OS=Apis mellifera OX=7460 PE=3 SV=1	0	FALSE		4.215	1	1	6	1	2299	261.6	8.97														13.9																	1
FALSE	High	Master Protein	A0A088AUD4	Uncharacterized protein OS=Apis mellifera OX=7460 PE=3 SV=1	0	FALSE		242.71	44	24	452	22	351	40.1	4.88	22.54		125.82	18.38	71.47	65.96	86.6	8.81	122.2	7.21	4.25	70.35	24.1	341.99	78.2	49.14	3.99	5		17	4	9	13	15	3	15	6	2	13	8	14	13	11	2
FALSE	High	Master Protein	A0A088AG76	Uncharacterized protein OS=Apis mellifera OX=7460 PE=3 SV=1	0	FALSE		16.053	3	4	5	4	2303	261.3	6.1			5.99				2.06			0										2				1			2
FALSE	High	Master Protein	A0A088A6A4	Uncharacterized protein OS=Apis mellifera OX=7460 PE=3 SV=1	0	FALSE		8.893	20	1	4	1	92	10.3	10.61			3.14		3.54	1.86			2.32											1		1	1			1
FALSE	High	Master Protein	A0A087ZU87	Uncharacterized protein OS=Apis mellifera OX=7460 PE=3 SV=1	0	FALSE		26.797	31	6	27	6	244	26.2	9.44			10.11	0	7.37	8.87			6.98	1.79		3.02	4.43		7.93					4	2	5	4			3	1		1	3		2
FALSE	High	Master Protein	A0A087ZPF2	Uncharacterized protein OS=Apis mellifera OX=7460 PE=3 SV=1	0	FALSE		110.578	33	15	30	15	746	83.2	6.4	90.51																	15
FALSE	High	Master Protein	A0A088AKU8	Uncharacterized protein OS=Apis mellifera OX=7460 PE=3 SV=1	0	FALSE		5.461	4	2	4	2	674	74.6	6.11								0									0								2									1
FALSE	High	Master Protein	A0A088AJE2	Uncharacterized protein OS=Apis mellifera OX=7460 PE=3 SV=1	0	FALSE		383.014	48	23	1701	23	413	46.6	8.54	215.96		324.86	9.34	473.84	373.96	165.43	2.53	563.6	19.13	1.89	266.95	985.31	507.09	1122.24	156.47		17		21	4	20	21	19	2	22	8	1	21	22	17	22	19
FALSE	High	Master Protein	A0A087ZS81	Uncharacterized protein OS=Apis mellifera OX=7460 PE=3 SV=1	0.001	FALSE		3.778	7	1	1	1	206	22.9	6.7												0																	1
FALSE	High	Master Protein	A0A088AGW1	Uncharacterized protein OS=Apis mellifera OX=7460 PE=3 SV=1	0	FALSE		24.201	38	5	40	5	112	12.8	9.61	5.63		4.51		9.68	6.24			6.08			2.4	6.85	6.67	10.04	0		3		4		4	4			2			1	3	2	2	1
FALSE	High	Master Protein	A0A088A460	Uncharacterized protein OS=Apis mellifera OX=7460 PE=3 SV=1	0	FALSE		4.339	3	1	1	1	367	42.3	4.51																0																	1
FALSE	High	Master Protein	A0A087ZQ27	Uncharacterized protein OS=Apis mellifera OX=7460 PE=3 SV=1	0	FALSE		343.886	57	35	799	18	658	71.7	5.58	189.82	4.38	72.22	71.16	97.98	129.71	20.91	43.08	177.47	32.49	108.09	90.6	181.97	208.8	319.77	136.41	24.2	25	4	18	20	18	23	9	18	25	18	24	22	26	23	26	24	12
FALSE	High	Master Protein	A0A087ZXE4	Uncharacterized protein OS=Apis mellifera OX=7460 PE=3 SV=1	0	FALSE		68.152	42	13	88	13	311	35.4	10.15	5.98		25.23		24.03	13.9			57.77			0	16.68	14.15	33.26	1.63		4		7		7	6			9			2	6	2	6	1
FALSE	High	Master Protein	A0A088A7G1	Uncharacterized protein OS=Apis mellifera OX=7460 PE=3 SV=1	0	FALSE		16.956	13	5	5	5	518	60	9.13			4.91									2.35								4									1
FALSE	High	Master Protein	A0A088AA98	Uncharacterized protein OS=Apis mellifera OX=7460 PE=3 SV=1	0	FALSE		8.298	17	3	15	3	191	21	5.54			3.58		3.45	3.44			4.05			1.89	1.79	4.93	3.59					1		1	1			1			1	1	2	1
FALSE	High	Master Protein	A0A088A787	Uncharacterized protein OS=Apis mellifera OX=7460 PE=3 SV=1	0.007	FALSE		3.165	5	1	2	1	325	35.7	8.27											0	0																1	1
FALSE	High	Master Protein	A0A088AC74	Uncharacterized protein OS=Apis mellifera OX=7460 PE=3 SV=1	0	FALSE		39.503	51	11	140	11	152	17.7	10.3	12.5		18.38	7.44	17.18	29.63	0	0	23.25	2.08	3.77	15.6	23.71	16.38	25.23	7.83	0	5		8	4	6	9	2	1	8	4	4	5	6	3	6	5	1
FALSE	High	Master Protein	A0A087ZX44	Uncharacterized protein OS=Apis mellifera OX=7460 PE=3 SV=1	0	FALSE		31.683	15	7	12	7	758	88.1	4.91	2.71				2.18	2.08			1.79	0		0		8.93	5.36			2				1	2			1	1		1		3	1
FALSE	High	Master Protein	A0A088AEQ3	Uncharacterized protein OS=Apis mellifera OX=7460 PE=3 SV=1	0	FALSE		13.808	19	4	16	4	266	29.4	9.6			4.52	1.62	1.9	4.41			8.71			0			2.3					2	2	1	3			4			1			1
FALSE	High	Master Protein	A0A088ABV3	Uncharacterized protein OS=Apis mellifera OX=7460 PE=3 SV=1	0	FALSE		157.27	26	10	675	10	311	35.8	7.05	302.67	4.64	162.62	92.07	135.91	148.81	22.41	123.77	90.24	93.71	120.31	143.07	73.99	159.66	131.19	116.13	37.8	9	5	9	9	9	10	8	9	9	9	10	10	7	8	9	9	8
FALSE	High	Master Protein	A0A087ZNL6	Uncharacterized protein OS=Apis mellifera OX=7460 PE=3 SV=1	0	FALSE		17.012	9	3	8	3	541	60.4	9.17					2.68	2.14			2.87			2.42		1.87	6.05							1	2			1			1		1	2
FALSE	High	Master Protein	A0A087ZPU0	Uncharacterized protein OS=Apis mellifera OX=7460 PE=3 SV=1	0	FALSE		120.968	74	13	139	13	262	28.7	7.49	11.53		64.67	8	2.81	36.94		0	27.12	0	14.25	42.06	14.21	14.5	28.7	26.42	0	4		7	7	1	9		1	6	1	7	10	6	3	7	8	1
FALSE	High	Master Protein	A0A088AEK0	Uncharacterized protein OS=Apis mellifera OX=7460 PE=3 SV=1	0	FALSE		14.213	6	3	23	1	498	57.7	8.53	4.16		7.25	0	5.12	5.07			4.85	0	0	2.2			10.13	1.91	0	1		2	1	1	1			1	1	1	1			3	1	1
FALSE	High	Master Protein	A0A088AVI5	Uncharacterized protein OS=Apis mellifera OX=7460 PE=3 SV=1	0	FALSE		11.233	16	2	5	2	186	21.3	9.72			2.22		2.27				3.95			0								1		1				1			2
FALSE	High	Master Protein	A0A088AH97	Uncharacterized protein OS=Apis mellifera OX=7460 PE=3 SV=1	0	FALSE		72.053	38	11	70	11	387	42.6	6.01			11.46	0	5.89	4.62			47.83	0		10.05	11.41	8.07	27.31	12.35	14.33			5	3	2	1			9	2		3	4	4	5	4	5
FALSE	High	Master Protein	A0A087ZRD2	Uncharacterized protein OS=Apis mellifera OX=7460 PE=3 SV=1	0.01	FALSE		2.518	4	1	1	1	393	44.1	6.71				1.87																	1
FALSE	High	Master Protein	A0A087ZRA1	Uncharacterized protein OS=Apis mellifera OX=7460 PE=3 SV=1	0	FALSE		803.634	91	39	6106	1	388	43	5.49	708.27	31.52	1257.23	220.51	1552.6	870.48	443.5	128.86	1541.21	182.25	157.68	752.97	2307.71	2298.06	3639.42	981.09	137.01	22	9	20	18	24	20	20	16	22	15	17	21	27	28	30	26	21
FALSE	High	Master Protein	A0A088ADQ7	Uncharacterized protein OS=Apis mellifera OX=7460 PE=3 SV=1	0	FALSE		20.34	12	5	9	5	621	71.6	7.3	0				0	0			10.91									1				1	1			5
FALSE	High	Master Protein	A0A087ZTW9	Uncharacterized protein OS=Apis mellifera OX=7460 PE=3 SV=1	0	FALSE		8.392	7	3	5	1	430	48.7	8.38			1.88			1.68							0		2.7					1			1							1		2
FALSE	High	Master Protein	A0A087ZQH3	Uncharacterized protein OS=Apis mellifera OX=7460 PE=3 SV=1	0.008	FALSE		3.048	12	1	1	1	84	9.3	4.88			0																	1
FALSE	High	Master Protein	A0A088A6Z4	Uncharacterized protein OS=Apis mellifera OX=7460 PE=3 SV=1	0	FALSE		201.269	57	32	256	32	711	78.4	6.05	25.09		57.58	58.56	87.44	106.62	35		69.56	4.57	0	42.15	17.21	69.74	54.77	9.4		9		12	15	17	22	14		20	6	1	15	8	19	12	7
FALSE	High	Master Protein	A0A087ZUE4	Uncharacterized protein OS=Apis mellifera OX=7460 PE=3 SV=1	0.007	FALSE		3.163	4	1	2	1	315	36.4	7.01	0		0															1		1
FALSE	High	Master Protein	A0A088ARX6	Uncharacterized protein OS=Apis mellifera OX=7460 PE=3 SV=1	0	FALSE		28.025	44	8	27	8	246	27.2	5.83	14.13			0	4.5		0	2.72		4.66	0	0					0	6			2	2		1	5		4	1	1					2
FALSE	High	Master Protein	A0A088ACI1	Uncharacterized protein OS=Apis mellifera OX=7460 PE=3 SV=1	0	FALSE		70.061	25	13	25	13	616	70.2	7.5			1.62	2.15	0	3.77			2.81				7.52	0	17.79	0				2	3	1	2			3				4	1	6	1
FALSE	High	Master Protein	A0A088A500	Uncharacterized protein OS=Apis mellifera OX=7460 PE=3 SV=1	0	FALSE		24.021	34	5	19	5	263	28.8	8.31	17.89	7.04		0			0	4.27		0	0							4	3		1			3	2		1	1
FALSE	High	Master Protein	A0A087ZR10	Uncharacterized protein OS=Apis mellifera OX=7460 PE=3 SV=1	0.006	FALSE		3.374	3	2	3	2	640	73.5	6.6																0	0																1	2
FALSE	High	Master Protein	A0A088AR30	Uncharacterized protein OS=Apis mellifera OX=7460 PE=3 SV=1	0	FALSE		10.764	4	2	10	2	869	101.7	8.44	0		0			0			2.27				0	2.15	2.85			1		1			1			1				1	2	1
FALSE	High	Master Protein	A0A087ZSN2	Uncharacterized protein OS=Apis mellifera OX=7460 PE=3 SV=1	0	FALSE		104.209	46	19	86	19	681	76	8.37	1.73		29.97	2.7	20.17	19.61			24.8	0		4.23	4.23		28.38	0		3		14	5	11	10			11	2		3	3		7	1
FALSE	High	Master Protein	A0A087ZSY5	Uncharacterized protein OS=Apis mellifera OX=7460 PE=3 SV=1	0.001	FALSE		3.915	6	1	2	1	174	20.5	4.5			0						0											1						1
FALSE	High	Master Protein	A0A087ZXJ6	Uncharacterized protein OS=Apis mellifera OX=7460 PE=3 SV=1	0	FALSE		34.261	4	7	13	7	2112	238.5	9.32			14.35			2.36							2.71		7.13					6			1							1		3
FALSE	High	Master Protein	A0A088A7F3	Uncharacterized protein OS=Apis mellifera OX=7460 PE=3 SV=1	0	FALSE		66.698	32	14	44	14	488	57.7	8.75					4.53	2.03			37.8					7.74	38.53	1.6						6	1			9					2	10	1
FALSE	High	Master Protein	A0A088AVB4	Uncharacterized protein OS=Apis mellifera OX=7460 PE=3 SV=1	0	FALSE		48.852	28	11	45	11	496	57.1	8.48	11.19			13.15	5.74	0			11.59	0			1.82					8			9	5	3			5	2			1
FALSE	High	Master Protein	A0A088A7T5	Uncharacterized protein OS=Apis mellifera OX=7460 PE=3 SV=1	0	FALSE		15.783	7	3	5	3	614	68.7	6.57			4.48						2.47						3.15					2						2						1
FALSE	High	Master Protein	A0A087ZPH5	Uncharacterized protein OS=Apis mellifera OX=7460 PE=3 SV=1	0	FALSE		98.044	31	13	39	13	542	61.9	5.31	0				10.25	5.63			28.13			3.32	16.77	14.97	21.22			1				2	2			8			2	6	3	5
FALSE	High	Master Protein	A0A088A7J1	Uncharacterized protein OS=Apis mellifera OX=7460 PE=3 SV=1	0	FALSE		11.52	9	4	6	1	430	49	8.92	1.86		1.88			1.68			2.18				0		2.7			1		1			1			1				1		1
FALSE	High	Master Protein	A0A088ADU7	Uncharacterized protein OS=Apis mellifera OX=7460 PE=3 SV=1	0	FALSE		74.312	39	14	84	14	378	44	8.46					7.88	1.95			57.52			3.55	1.94	32.2	37.51	8.73	2.27					3	1			13			2	1	7	9	5	2
FALSE	High	Master Protein	A0A088AHE9	Uncharacterized protein OS=Apis mellifera OX=7460 PE=4 SV=1	0	FALSE		6.131	6	1	1	1	299	35	9.5															3.13																	1
FALSE	High	Master Protein	A0A088AVX7	Uncharacterized protein OS=Apis mellifera OX=7460 PE=4 SV=1	0	FALSE		24.07	8	4	11	4	582	69.5	4.37	1.91				2.48				4.92				4.08		12.12			1				1				2				2		3
FALSE	High	Master Protein	A0A088ASI1	Uncharacterized protein OS=Apis mellifera OX=7460 PE=4 SV=1	0	FALSE		5.973	21	2	2	2	111	12.7	5.17			0						2.57											1						1
FALSE	High	Master Protein	A0A087ZZY5	Uncharacterized protein OS=Apis mellifera OX=7460 PE=4 SV=1	0	FALSE		122.642	39	17	114	17	475	54.7	4.25	22.14		2.89		30.84	21.3	10.13		57.4			19.33	40.71	37.22	57.96	5.85		4		2		8	7	5		11			5	9	8	12	4
FALSE	High	Master Protein	A0A088A2C4	Uncharacterized protein OS=Apis mellifera OX=7460 PE=4 SV=1	0	FALSE		9.125	6	4	6	4	975	114	5.67	1.91							1.62						0		3.59		1							2						1		2
FALSE	High	Master Protein	A0A087ZQS4	Uncharacterized protein OS=Apis mellifera OX=7460 PE=4 SV=1	0	FALSE		7.196	1	2	2	2	3276	374.6	6.74									2.21						2.85											1						1
FALSE	High	Master Protein	A0A088AT40	Uncharacterized protein OS=Apis mellifera OX=7460 PE=4 SV=1	0	FALSE		12.498	19	4	16	4	205	23.8	8.68	2.09		2.26		0			0				2.04	0		4.55	3.69	0	2		2		1			1				1	1		2	3	2
FALSE	High	Master Protein	A0A088ALR8	Uncharacterized protein OS=Apis mellifera OX=7460 PE=4 SV=1	0	FALSE		5.733	16	1	5	1	73	8	8						4.27			5.69			2.11											1			1			1
[truncated: 356 more rows]
[truncated: 28 more columns]

## Sheet: Feuil1
Table S3_Multireport of proteins identified in the esophagus section
[truncated: 2,186 more rows]
[truncated: 28 more columns]
